# Supplementary material for: Modular, cascade-like transcriptional program of regeneration in Stentor
Source: eLife. 2022 Aug 4;11:e80778. doi: 10.7554/eLife.80778 (PMC9371601; doi:10.7554/eLife.80778)
Supplement: Supplementary file 1. [file elife-80778-supp1.xlsx]

## Sheet: Sheet1
Gene	CHX/E2F/Pumilio	manual annotation	StentorDB_Description	blastp_trinity	pfam	Cluster
SteCoe_11507		Aldo/keto reductase	Aldo_ket_red domain protein	blastp_trinity:KCAB_ARATH|271;	pfam:KCAB_ARATH|271;	1
SteCoe_12188		hypothetical protein	hypothetical protein			1
SteCoe_12572		chorein vesicle mediated sorter	Chorein_N domain protein	blastp_trinity:VP13A_DICDI|133;	pfam:VP13A_DICDI|133;	1
SteCoe_13238		Glyoxalase	Glyoxalase_4 domain protein	blastp_trinity:YQJC_BACSU|47.0;	pfam:YQJC_BACSU|47.0;	1
SteCoe_16057		TPR Domain protein	TPR_12 domain protein			1
SteCoe_16295		ring finger domain protein	zf-RING_2 domain protein	blastp_trinity:RHC2A_ARATH|77.8;	pfam:RHC2A_ARATH|77.8;	1
SteCoe_17003		serine carboxypeptidase	Peptidase_S10 domain protein	blastp_trinity:PPGB_HUMAN|263;	pfam:PPGB_HUMAN|263;	1
SteCoe_17020	unaffected in CHX	PIEZO, ISOFORM E	Piezo_RRas_bdg domain protein	blastp_trinity:PIEZ2_MOUSE|132;	pfam:PIEZ2_MOUSE|132;	1
SteCoe_19597		Glycosyl hydrolase family	Glyco_hydro_1 domain protein	blastp_trinity:BGL40_ARATH|401;	pfam:BGL40_ARATH|401;	1
SteCoe_21125		serine carboxypeptidase	Peptidase_S10 domain protein	blastp_trinity:CPVL_DICDI|193;	pfam:CPVL_DICDI|193;	1
SteCoe_25044	unaffected in CHX	Aldo/keto reductase	Aldo_ket_red domain protein	blastp_trinity:KCAB2_HUMAN|286;	pfam:KCAB2_HUMAN|286;	1
SteCoe_25658		von willebrand factor domain	VWA domain protein	blastp_trinity:WAV3_ARATH|70.9;	pfam:WAV3_ARATH|70.9;	1
SteCoe_27035		CDPK family kinase	CDPK family kinase			1
SteCoe_28597		Acyltransferase family protein	hypothetical protein			1
SteCoe_29480		papain family cysteine protease	Inhibitor_I29 domain protein	blastp_trinity:CYSP3_SOLLC|319;	pfam:CYSP3_SOLLC|319;	1
SteCoe_29951		hypothetical protein	hypothetical protein	blastp_trinity:ABPF_DICDI|126;	pfam:ABPF_DICDI|126;	1
SteCoe_30028		dehydrogenase	ELFV_dehydrog_N domain protein	blastp_trinity:DHE3_DICDI|435;	pfam:DHE3_DICDI|435;	1
SteCoe_30064		hypothetical protein	hypothetical protein			1
SteCoe_30537		patatin-like phospholipase	Patatin domain protein			1
SteCoe_30872		papain family cysteine protease	Inhibitor_I29 domain protein	blastp_trinity:SAG39_ORYSJ|254;	pfam:SAG39_ORYSJ|254;	1
SteCoe_31401		hypothetical protein	hypothetical protein			1
SteCoe_31974		SHIPPO-rpt domain protein	SHIPPO-rpt domain protein			1
SteCoe_33477		S1/P1 Nuclease	hypothetical protein	blastp_trinity:ENDO1_ARATH|95.1;	pfam:ENDO1_ARATH|95.1;	1
SteCoe_34506		Peptidase family M1	hypothetical protein	blastp_trinity:AMPN_STRLI|382;	pfam:AMPN_STRLI|382;	1
SteCoe_35507		nucleoporin	hypothetical protein	blastp_trinity:NU98B_ARATH|84.7;	pfam:NU98B_ARATH|84.7;	1
SteCoe_6625		Copine family protein	C2 domain protein	blastp_trinity:CPNE1_HUMAN|296;	pfam:CPNE1_HUMAN|296;	1
SteCoe_7234		Lyase	Lyase_1 domain protein	blastp_trinity:FUMH_DANRE|640;	pfam:FUMH_DANRE|640;	1
SteCoe_8304		Peptidase C26	Peptidase_C26 domain protein	blastp_trinity:GGHA_DICDI|196;	pfam:GGHA_DICDI|196;	1
SteCoe_8314		Nicotinate phosphoribosyltransferase	NAPRTase domain protein	blastp_trinity:PNCB_DICDI|555;	pfam:PNCB_DICDI|555;	1
SteCoe_853		PEPCK	PEPCK_ATP domain protein	blastp_trinity:PCKA_DICDI|661;	pfam:PCKA_DICDI|661;	1
SteCoe_893		MIP-T3 domain protein	MIP-T3 domain protein			1
SteCoe_10077		RCC1 repeat protein	RCC1 domain protein	blastp_trinity:HERC3_HUMAN|54.7;	pfam:HERC3_HUMAN|54.7;	2
SteCoe_10435		E3 ubiquitin ligase	HECT domain protein	blastp_trinity:UPL4_ARATH|93.6;	pfam:UPL4_ARATH|93.6;	2
SteCoe_11278		Rb	RB_A domain protein	blastp_trinity:RB_CHICK|102;	pfam:RB_CHICK|102;	2
SteCoe_11468		cyclin	Cyclin	blastp_trinity:CCB15_ORYSJ|75.9;	pfam:CCB15_ORYSJ|75.9;	2
SteCoe_11669		calpain family cysteine protease	Peptidase_C2 domain protein	blastp_trinity:DEK1_ARATH|155;	pfam:DEK1_ARATH|155;	2
SteCoe_11863		hypothetical protein	hypothetical protein			2
SteCoe_11902	unaffected in CHX	hypothetical protein	hypothetical protein			2
SteCoe_12064		T-complex protein 10	Tcp10_C domain protein	blastp_trinity:CENPJ_MOUSE|170;	pfam:CENPJ_MOUSE|170;	2
SteCoe_12066		hypothetical protein	hypothetical protein			2
SteCoe_12147	pumilio target	POC5	hypothetical protein	blastp_trinity:POC5_MACFA|60.8;	pfam:POC5_MACFA|60.8;	2
SteCoe_12169		hypothetical protein	hypothetical protein			2
SteCoe_12202		POC18	hypothetical protein	blastp_trinity:TBC31_HUMAN|212;	pfam:TBC31_HUMAN|212;	2
SteCoe_12256		cyclic nucleotide binding domain protein	cNMP_binding domain protein	blastp_trinity:KAPR_EMENI|222;	pfam:KAPR_EMENI|222;	2
SteCoe_12689		hypothetical protein	hypothetical protein			2
SteCoe_12750		E2F	E2F_TDP domain protein	blastp_trinity:E2FB_ARATH|157;	pfam:E2FB_ARATH|157;	2
SteCoe_12767	E2F target	Cyclin A associated protein	hypothetical protein	blastp_trinity:SCAPE_HUMAN|163;		2
SteCoe_13076		EF hand protein	hypothetical protein			2
SteCoe_1322		hypothetical protein	hypothetical protein			2
SteCoe_13246		kinesin protein	Kinesin domain protein	blastp_trinity:KN14E_ARATH|376;	pfam:KN14E_ARATH|376;	2
SteCoe_13324		DUF2475 domain protein	hypothetical protein			2
SteCoe_13417		kinesin protein	Kinesin domain protein	blastp_trinity:KRP95_STRPU|336;	pfam:KRP95_STRPU|336;	2
SteCoe_13815		Peptidase family M1	Peptidase_M1 domain protein	blastp_trinity:AMPN_STRLI|436;	pfam:AMPN_STRLI|436;	2
SteCoe_13822		hypothetical protein	hypothetical protein			2
SteCoe_13955		hypothetical protein	hypothetical protein			2
SteCoe_14196		Gamma-tubulin	Tubulin domain protein			2
SteCoe_14283		TATA element modulatory factor I	hypothetical protein			2
SteCoe_14328		hypothetical protein	DUF4457 domain protein	blastp_trinity:K0556_MOUSE|60.8;	pfam:K0556_MOUSE|60.8;	2
SteCoe_14511		hypothetical protein	hypothetical protein			2
SteCoe_14889		MORN domain PI5 kinase	MORN domain protein	blastp_trinity:PI5K8_ARATH|85.9;	pfam:PI5K8_ARATH|85.9;	2
SteCoe_14908		hypothetical protein	hypothetical protein			2
SteCoe_15022		hypothetical protein	hypothetical protein	blastp_trinity:CCD77_XENLA|73.2;	pfam:CCD77_XENLA|73.2;	2
SteCoe_15273		Fidgetin AAA MT depolymerase	AAA domain protein	blastp_trinity:FIGL1_HUMAN|369;	pfam:FIGL1_HUMAN|369;	2
SteCoe_153		DYRK family kinase	DYRK family kinase			2
SteCoe_15442		Enkurin domain protein	Enkurin domain protein			2
SteCoe_15774		condensin subunit required for MAC and MIC division	SMC_N domain protein	blastp_trinity:SMC3_XENLA|587;	pfam:SMC3_XENLA|587;	2
SteCoe_15897		hypothetical protein	hypothetical protein			2
SteCoe_16010		VPS13/chorein	Chorein_N domain protein	blastp_trinity:VP13A_MOUSE|62.8;	pfam:VP13A_MOUSE|62.8;	2
SteCoe_16028		hypothetical protein	hypothetical protein			2
SteCoe_16279		hypothetical protein	hypothetical protein			2
SteCoe_1656		MCM2/3/5 family	MCM_N domain protein	blastp_trinity:MCM4_HUMAN|718;	pfam:MCM4_HUMAN|718;	2
SteCoe_166		JOUBERIN	WD40 domain protein	blastp_trinity:AHI1_MOUSE|234;	pfam:AHI1_MOUSE|234;	2
SteCoe_17149		hypothetical protein	hypothetical protein			2
SteCoe_17186		hypothetical protein	hypothetical protein			2
SteCoe_17199		hypothetical protein	RPA_C domain protein			2
SteCoe_17518		XRN 5'-3' exonuclease	XRN_N domain protein	blastp_trinity:XRN4_ARATH|532;	pfam:XRN4_ARATH|532;	2
SteCoe_17585		MutS domain III mismatch repair gene	MutS_I domain protein	blastp_trinity:MSH6_CHICK|515;	pfam:MSH6_CHICK|515;	2
SteCoe_17690		hypothetical protein	hypothetical protein			2
SteCoe_17725		SNF2 family	SNF2_N domain protein	blastp_trinity:RAD54_CHICK|420;	pfam:RAD54_CHICK|420;	2
SteCoe_17744		hypothetical protein	hypothetical protein			2
SteCoe_17804		Thymidylate synthase	DHFR_1 domain protein	blastp_trinity:DRTS_MAIZE|497;	pfam:DRTS_MAIZE|497;	2
SteCoe_17827		hypothetical protein	hypothetical protein			2
SteCoe_17833	pumilio target	flap endonuclease-1	XPG_N domain protein	blastp_trinity:FEN11_PARTE|346;	pfam:FEN11_PARTE|346;	2
SteCoe_17985	pumilio target	RNA recognition motif protein	hypothetical protein	blastp_trinity:SYC_CYAP7|55.5;	pfam:SYC_CYAP7|55.5;	2
SteCoe_18056	E2F target	Alpha/beta hydrolase family	Toprim_2 domain protein	blastp_trinity:PEO1_HUMAN|348;	pfam:PEO1_HUMAN|348;	2
SteCoe_18273		Spc97 / Spc98 family protein	Spc97_Spc98 domain protein			2
SteCoe_18411		MRX meiotic dsb formation protein	AAA_23 domain protein	blastp_trinity:RAD50_DICDI|136;	pfam:RAD50_DICDI|136;	2
SteCoe_1855		hypothetical protein	hypothetical protein			2
SteCoe_18713		importin alpha	Arm domain protein	blastp_trinity:IMPA5_ARATH|78.2;	pfam:IMPA5_ARATH|78.2;	2
SteCoe_18908		hypothetical protein	hypothetical protein			2
SteCoe_19609		EF-hand_7 domain protein	EF-hand_7 domain protein			2
SteCoe_19832		hypothetical protein	GAS2 domain protein			2
SteCoe_20010		Ribonucleotide reductase	ATP-cone domain protein	blastp_trinity:RIR1_MOUSE|1068;	pfam:RIR1_MOUSE|1068;	2
SteCoe_20039		ExoIII family purinicapyrimidinic endonuclease	Exo_endo_phos domain protein	blastp_trinity:APEX1_DANRE|263;	pfam:APEX1_DANRE|263;	2
SteCoe_20145		PCNA	PCNA_N domain protein	blastp_trinity:PCNA_MAIZE|250;	pfam:PCNA_MAIZE|250;	2
SteCoe_20174		kinesin family member	Kinesin domain protein	blastp_trinity:KI21B_RAT|84.7;	pfam:KI21B_RAT|84.7;	2
SteCoe_20199		LRR domain protein	LRR_6 domain protein	blastp_trinity:PP1R7_ARATH|55.8;	pfam:PP1R7_ARATH|55.8;	2
SteCoe_20205	E2F target	MORN domain PI5 kinase	IQ domain protein	blastp_trinity:PI5K4_ARATH|75.5;	pfam:PI5K4_ARATH|75.5;	2
SteCoe_20228		hypothetical protein	hypothetical protein	blastp_trinity:TRAD1_MOUSE|68.9;	pfam:TRAD1_MOUSE|68.9;	2
SteCoe_20343		SAS6	SAS-6_N domain protein	blastp_trinity:SAS6_XENLA|208;	pfam:SAS6_XENLA|208;	2
SteCoe_20709		ERK7 subfamily kinase	ERK7 subfamily kinase			2
SteCoe_20715		WD repeat protin	hypothetical protein	blastp_trinity:WRP73_HUMAN|274;	pfam:WRP73_HUMAN|274;	2
SteCoe_20737		hypothetical protein	IQ domain protein			2
SteCoe_2089		Oxysterol-binding protein	PH domain protein	blastp_trinity:OSBL6_HUMAN|291;	pfam:OSBL6_HUMAN|291;	2
SteCoe_2092		14-3-3 protein	14-3-3 domain protein	blastp_trinity:14338_ARATH|267;	pfam:14338_ARATH|267;	2
SteCoe_20991		Kelch motif family member	zf-C3HC4 domain protein	blastp_trinity:KLH10_HUMAN|66.2;	pfam:KLH10_HUMAN|66.2;	2
SteCoe_21018	pumilio target	DYRK family kinase	DYRK family kinase	blastp_trinity:DYRK4_HUMAN|385;	pfam:DYRK4_HUMAN|385;	2
SteCoe_21451		hypothetical protein	Kelch_1 domain protein			2
SteCoe_2152	unaffected in CHX - E2F target	hypothetical protein	DUF4378 domain protein			2
SteCoe_21625		Rb	RB_A domain protein	blastp_trinity:RB_HUMAN|99.0;	pfam:RB_HUMAN|99.0;	2
SteCoe_21711		hypothetical protein	hypothetical protein			2
SteCoe_22277		hypothetical protein	hypothetical protein			2
SteCoe_22280		hypothetical protein	hypothetical protein			2
SteCoe_22457		hypothetical protein	hypothetical protein			2
SteCoe_22986		hypothetical protein	hypothetical protein			2
SteCoe_23002		hypothetical protein	hypothetical protein			2
SteCoe_23009		hypothetical protein	hypothetical protein			2
SteCoe_23171		RNA helicase	DEAD domain protein	blastp_trinity:ESP3_ARATH|58.5;	pfam:ESP3_ARATH|58.5;	2
SteCoe_23241		BTB/POZ domain	BTB domain protein	blastp_trinity:UFD4_DROME|114;	pfam:UFD4_DROME|114;	2
SteCoe_23427		hypothetical protein	hypothetical protein			2
SteCoe_23434		hypothetical protein	hypothetical protein			2
SteCoe_23557		FOP dimerization domain protei	FOP_dimer domain protein			2
SteCoe_23683	E2F target	hypothetical protein	hypothetical protein			2
SteCoe_23903		PARP	WGR domain protein	blastp_trinity:PARP2_ARATH|442;	pfam:PARP2_ARATH|442;	2
SteCoe_24205		hypothetical protein	hypothetical protein			2
SteCoe_24252	unaffected in CHX	hypothetical protein	hypothetical protein			2
SteCoe_24345	pumilio target	NEK family kinase	NEK family kinase	blastp_trinity:NEK1_MOUSE|221;	pfam:NEK1_MOUSE|221;	2
SteCoe_24362		Kinesin domain protein	Kinesin domain protein			2
SteCoe_24378		amidase family protein	Amidase domain protein	blastp_trinity:FAAH1_CAEEL|188;	pfam:FAAH1_CAEEL|188;	2
SteCoe_24542		kinesin family member	Kinesin domain protein	blastp_trinity:KIF4_XENLA|387;	pfam:KIF4_XENLA|387;	2
SteCoe_24581		POC18	RabGAP-TBC domain protein	blastp_trinity:TBC31_BOVIN|243;	pfam:TBC31_BOVIN|243;	2
SteCoe_24817		hypothetical protein	hypothetical protein			2
SteCoe_24855		hypothetical protein	hypothetical protein			2
SteCoe_24864		Iguana ciliogenesis related dzip1 like protein	Dzip-like_N domain protein	blastp_trinity:DZIP1_HUMAN|82.4;	pfam:DZIP1_HUMAN|82.4;	2
SteCoe_24999		ODA11 outer dynein arm heavy chain	hypothetical protein			2
SteCoe_25279		kinesin family member	Kinesin domain protein	blastp_trinity:KN13B_ARATH|423;	pfam:KN13B_ARATH|423;	2
SteCoe_25356		zf-C2H2 domain protein	zf-C2H2 domain protein			2
SteCoe_25392		hypothetical protein	hypothetical protein			2
SteCoe_25552		zf-C2H2 domain protein	zf-C2H2 domain protein			2
SteCoe_25916		Iguana ciliogenesis related dzip1 like protein	Dzip-like_N domain protein	blastp_trinity:DZIP1_DANRE|71.2;	pfam:DZIP1_DANRE|71.2;	2
SteCoe_25937		hypothetical protein	hypothetical protein			2
SteCoe_2670		DYRK family kinase	DYRK family kinase	blastp_trinity:DYRK3_MOUSE|209;	pfam:DYRK3_MOUSE|209;	2
SteCoe_26710		hypothetical protein	hypothetical protein			2
SteCoe_26764		axonemal dynein heavy chain	DHC_N2 domain protein	blastp_trinity:DYH6_HUMAN|69.7;	pfam:DYH6_HUMAN|69.7;	2
SteCoe_26943		Histone H2A	CBFD_NFYB_HMF domain protein			2
SteCoe_27200	unaffected in CHX	hypothetical protein	zf-LITAF-like domain protein			2
SteCoe_27215		hypothetical protein	hypothetical protein	blastp_trinity:CT194_HUMAN|63.9;	pfam:CT194_HUMAN|63.9;	2
SteCoe_27269		NEK family kinase	NEK family kinase	blastp_trinity:NEK1_HUMAN|306;	pfam:NEK1_HUMAN|306;	2
SteCoe_27331		RRM RNA recognition motif protein	hypothetical protein	blastp_trinity:SYC_CYAP7|53.1;	pfam:SYC_CYAP7|53.1;	2
SteCoe_27339		pumilio	PUF domain protein	blastp_trinity:PUM_DROME|102;	pfam:PUM_DROME|102;	2
SteCoe_27385		actin	Actin domain protein	blastp_trinity:ACT13_SOLTU|396;	pfam:ACT13_SOLTU|396;	2
SteCoe_27613		MMS1_N domain protein	MMS1_N domain protein			2
SteCoe_27617		hypothetical protein	POT1 domain protein			2
SteCoe_27630		HEAT repeat protein	hypothetical protein			2
SteCoe_27672		Guanylate-binding protei	GBP domain protein	blastp_trinity:GBP1_PONAB|251;	pfam:GBP1_PONAB|251;	2
SteCoe_27758		zf-C3HC4 domain protein	zf-C3HC4 domain protein			2
SteCoe_27794		FAP256	PH domain protein	blastp_trinity:CLU_ARATH|69.7;	pfam:CLU_ARATH|69.7;	2
SteCoe_27796		hypothetical protein	hypothetical protein			2
SteCoe_27984	pumilio target	PARP	WGR domain protein	blastp_trinity:PARP1_BOVIN|340;	pfam:PARP1_BOVIN|340;	2
SteCoe_2811	E2F target	hypothetical protein	hypothetical protein			2
SteCoe_28156		DNA repair helicase	DEAD_2 domain protein	blastp_trinity:DDX11_MOUSE|58.2;	pfam:DDX11_MOUSE|58.2;	2
SteCoe_28216		topoisomerase II	DNA_gyraseB domain protein	blastp_trinity:TOP2_SCHPO|87.8;	pfam:TOP2_SCHPO|87.8;	2
SteCoe_2829		thymidine kinase	TK domain protein	blastp_trinity:KITH_DICDI|194;	pfam:KITH_DICDI|194;	2
SteCoe_28336		BLD10/CEP135	hypothetical protein	blastp_trinity:CP135_DANRE|96.3;	pfam:CP135_DANRE|96.3;	2
SteCoe_28361	unaffected in CHX	SERINE/THREONINE-PROTEIN PHOSPHATASE 2A REGULATORY SUBUNIT	hypothetical protein	blastp_trinity:P2R3C_HUMAN|392;	pfam:P2R3C_HUMAN|392;	2
SteCoe_28380		E2FDP - DP1 dimerization partner of E2F	E2F_TDP domain protein	blastp_trinity:DPB_ARATH|81.6;	pfam:DPB_ARATH|81.6;	2
SteCoe_28661		fizzy/CDH1 APC cofactor	ANAPC4_WD40 domain protein	blastp_trinity:FZR1_HUMAN|332;	pfam:FZR1_HUMAN|332;	2
SteCoe_2879		hypothetical protein	hypothetical protein			2
SteCoe_29039	unaffected in CHX	plk polo like kinase	PLK family kinase	blastp_trinity:CCR1_MAIZE|159;	pfam:CCR1_MAIZE|159;	2
SteCoe_29081		hypothetical protein	hypothetical protein			2
SteCoe_29412		hypothetical protein	hypothetical protein			2
SteCoe_29775		Rb	RB_A domain protein	blastp_trinity:RBF_DROME|100;	pfam:RBF_DROME|100;	2
SteCoe_29832	unaffected in CHX	FlxA-like protein	hypothetical protein			2
SteCoe_29885		TIMELESS DNA replication protein	TIMELESS domain protein	blastp_trinity:TIM_RAT|131;	pfam:TIM_RAT|131;	2
SteCoe_30283		kinesin family member	Kinesin domain protein	blastp_trinity:KIFC1_MOUSE|173;	pfam:KIFC1_MOUSE|173;	2
SteCoe_30307		Methyltransferase	Methyltransf_11 domain protein	blastp_trinity:MET13_MOUSE|129;	pfam:MET13_MOUSE|129;	2
SteCoe_30496		hypothetical protein	hypothetical protein			2
SteCoe_30598		hypothetical protein	hypothetical protein			2
SteCoe_30636		chromatin assembly factor CAF1	ANAPC4_WD40 domain protein	blastp_trinity:CAF1B_MOUSE|207;	pfam:CAF1B_MOUSE|207;	2
SteCoe_30650		Radial spoke protein 3	Radial_spoke_3 domain protein			2
SteCoe_30786		hypothetical protein	hypothetical protein			2
SteCoe_30802		hypothetical protein	hypothetical protein	blastp_trinity:IMA3_HUMAN|58.2;	pfam:IMA3_HUMAN|58.2;	2
SteCoe_30997	unaffected in CHX	hypothetical protein	hypothetical protein			2
SteCoe_31055	unaffected in CHX	hypothetical protein	Enkurin domain protein			2
SteCoe_3122	E2F target	STE7 family protein kinase	STE7 family kinase	blastp_trinity:M2K3_ARATH|251;	pfam:M2K3_ARATH|251;	2
SteCoe_3125		hypothetical protein	hypothetical protein			2
SteCoe_31257		hypothetical protein	hypothetical protein			2
SteCoe_31301		rttn	hypothetical protein	blastp_trinity:RTTN_MOUSE|61.2;	pfam:RTTN_MOUSE|61.2;	2
SteCoe_31645		hypothetical protein	hypothetical protein	blastp_trinity:ARMC9_BOVIN|249;	pfam:ARMC9_BOVIN|249;	2
SteCoe_31674		GSK family kinase, RIM11 related	GSK family kinase			2
SteCoe_32087		FOP N terminal dimerization domain	hypothetical protein			2
SteCoe_32192		hypothetical protein	hypothetical protein			2
SteCoe_32411		VFL3	hypothetical protein	blastp_trinity:CCD61_DANRE|130;	pfam:CCD61_DANRE|130;	2
SteCoe_32481		hypothetical protein	hypothetical protein			2
SteCoe_33071		anaphase-promoting complex subunit 2 (APC2)	hypothetical protein	blastp_trinity:APC2_ARATH|213;	pfam:APC2_ARATH|213;	2
SteCoe_33156	unaffected in CHX	hypothetical protein	hypothetical protein			2
SteCoe_33260		Kinesin motor domain	hypothetical protein			2
SteCoe_33320		NEK family kinase	NEK family kinase	blastp_trinity:NEK2_DICDI|366;	pfam:NEK2_DICDI|366;	2
SteCoe_33393		hypothetical protein	hypothetical protein			2
SteCoe_33421		hypothetical protein	hypothetical protein			2
SteCoe_33580		POC16	hypothetical protein	blastp_trinity:WDR90_XENTR|271;	pfam:WDR90_XENTR|271;	2
SteCoe_33673	unaffected in CHX	hypothetical protein	hypothetical protein			2
SteCoe_3381		STIL	STIL_N domain protein	blastp_trinity:STIL_HUMAN|89.0;	pfam:STIL_HUMAN|89.0;	2
SteCoe_34687		hypothetical protein	hypothetical protein			2
SteCoe_34812		hypothetical protein	hypothetical protein			2
SteCoe_34958	unaffected in CHX	Centrin	hypothetical protein			2
SteCoe_35100		tubulin chaperone E	hypothetical protein	blastp_trinity:TBCE_ARATH|169;	pfam:TBCE_ARATH|169;	2
SteCoe_35245		hypothetical protein	hypothetical protein			2
SteCoe_35496		Meckel syndrom MKS-6/CC2D2A,	hypothetical protein	blastp_trinity:C2D2A_HUMAN|226;	pfam:C2D2A_HUMAN|226;	2
SteCoe_35584		hypothetical protein	hypothetical protein			2
SteCoe_35974		Rb	hypothetical protein	blastp_trinity:RB_CHICK|140;	pfam:RB_CHICK|140;	2
SteCoe_36042		Calcineurin-like phosphoesterase	hypothetical protein	blastp_trinity:BSU1_ARATH|444;	pfam:BSU1_ARATH|444;	2
SteCoe_36135		hypothetical protein	hypothetical protein			2
SteCoe_36229		hypothetical protein	hypothetical protein			2
SteCoe_36532		kinesin family member	Kinesin domain protein	blastp_trinity:KIF3B_HUMAN|235;	pfam:KIF3B_HUMAN|235;	2
SteCoe_36815		hypothetical protein	hypothetical protein			2
SteCoe_36997		Hsp90	HATPase_c domain protein	blastp_trinity:HSP83_ORYSJ|969;	pfam:HSP83_ORYSJ|969;	2
SteCoe_37042		hypothetical protein	hypothetical protein			2
SteCoe_37168		CLASP_N domain protein	CLASP_N domain protein			2
SteCoe_37257		hypothetical protein	hypothetical protein			2
SteCoe_37356		basal body transition fiber protein XRP2/TBCC	TBCC domain protein	blastp_trinity:XRP2_XENLA|137;	pfam:XRP2_XENLA|137;	2
SteCoe_37654		hypothetical protein	hypothetical protein			2
SteCoe_37713		WD40 protein	WD40 domain protein	blastp_trinity:YY46_NOSS1|99.4;	pfam:YY46_NOSS1|99.4;	2
SteCoe_3815		CEP350 centriole protein involved in ciliogenesis	DUF4378 domain protein	blastp_trinity:ZAN_HUMAN|80.1;	pfam:ZAN_HUMAN|80.1;	2
SteCoe_404		gamma tubulin ring complex protein GCP2/Spc97	Spc97_Spc98 domain protein	blastp_trinity:GCP6_HUMAN|90.1;	pfam:GCP6_HUMAN|90.1;	2
SteCoe_4146		TWI1 twister like protein	PIH1 domain protein	blastp_trinity:PIHD3_HUMAN|103;	pfam:PIHD3_HUMAN|103;	2
SteCoe_4188		MCM2/3/5 family	MCM_N domain protein	blastp_trinity:MCM7_ARATH|674;	pfam:MCM7_ARATH|674;	2
SteCoe_4345		EF-hand_7 domain protein	EF-hand_7 domain protein			2
SteCoe_4416	E2F target	Calcineurin-like phosphoesterase	Metallophos domain protein	blastp_trinity:PP2BA_DICDI|408;	pfam:PP2BA_DICDI|408;	2
SteCoe_4424		hypothetical protein	hypothetical protein			2
SteCoe_4593		Alpha/beta hydrolase family	Hydrolase_4 domain protein	blastp_trinity:YQKD_BACSU|67.8;	pfam:YQKD_BACSU|67.8;	2
SteCoe_5031		hypothetical protein	hypothetical protein	blastp_trinity:RRBP1_HUMAN|55.1;		2
SteCoe_5035		hypothetical protein	hypothetical protein			2
SteCoe_517		EF-hand 7 protein	EF-hand_7 domain protein	blastp_trinity:CATR_SCHDU|189;	pfam:CATR_SCHDU|189;	2
SteCoe_519	E2F target	TPR protein	TPR_16 domain protein	blastp_trinity:SRFR1_ARATH|60.1;	pfam:SRFR1_ARATH|60.1;	2
SteCoe_5315		PLD-like domain protein	PLDc_2 domain protein	blastp_trinity:PLD6_CHLRE|125;	pfam:PLD6_CHLRE|125;	2
SteCoe_5445		hypothetical protein	hypothetical protein			2
SteCoe_5532		cyclic nucleotide binding domain protein	hypothetical protein			2
SteCoe_5537		hypothetical protein	BET domain protein			2
SteCoe_570		hypothetical protein	hypothetical protein			2
SteCoe_5759		hypothetical protein	hypothetical protein			2
SteCoe_5830		Ribonucleotide reductase	Ribonuc_red_sm domain protein	blastp_trinity:RIR2_TRYBB|473;	pfam:RIR2_TRYBB|473;	2
SteCoe_5866		hypothetical protein	hypothetical protein			2
SteCoe_5922		hypothetical protein	hypothetical protein			2
SteCoe_6117		hypothetical protein	DUF4457 domain protein	blastp_trinity:K0556_MOUSE|58.2;	pfam:K0556_MOUSE|58.2;	2
SteCoe_6161		Importin alpha	hypothetical protein	blastp_trinity:IMPA4_ARATH|94.4;	pfam:IMPA4_ARATH|94.4;	2
SteCoe_6334		MKS1 meckel syndrom protein	B9-C2 domain protein	blastp_trinity:B9D1_XENLA|103;	pfam:B9D1_XENLA|103;	2
SteCoe_6426		hypothetical protein	hypothetical protein	blastp_trinity:C2CD3_MOUSE|60.1;	pfam:C2CD3_MOUSE|60.1;	2
SteCoe_6601		hypothetical protein	EF-hand_5 domain protein			2
SteCoe_6661		Spt5-NGN domain transcriptional elongation protein	Spt5-NGN domain protein			2
SteCoe_6770		DYRK kinase	DYRK family kinase	blastp_trinity:DYRK4_MOUSE|428;	pfam:DYRK4_MOUSE|428;	2
SteCoe_6850		hypothetical protein	CDT1 domain protein			2
SteCoe_6913	unaffected in CHX	MEMBRANE ASSOCIATED RING FINGER	RINGv domain protein	blastp_trinity:MARHA_RAT|58.5;	pfam:MARHA_RAT|58.5;	2
SteCoe_7054		hypothetical protein	hypothetical protein			2
SteCoe_7260		hypothetical protein	hypothetical protein			2
SteCoe_7359		POC11	hypothetical protein	blastp_trinity:CCD77_XENLA|71.6;	pfam:CCD77_XENLA|71.6;	2
SteCoe_7370	E2F target	kinesin family member	Kinesin domain protein	blastp_trinity:KIF15_STRPU|451;	pfam:KIF15_STRPU|451;	2
SteCoe_7436	Pumilio target	MKS3 meckel syndrome protein	Meckelin domain protein	blastp_trinity:MKS3_HUMAN|288;	pfam:MKS3_HUMAN|288;	2
SteCoe_7656		Ribonucleoside-diphosphate reductase	ATP-cone domain protein	blastp_trinity:RIR1_MOUSE|1066;	pfam:RIR1_MOUSE|1066;	2
SteCoe_7981		hypothetical protein	hypothetical protein			2
SteCoe_8491		DEAD domain RNA helicase	DEAD domain protein			2
SteCoe_8503		hypothtical protein	LRR_6 domain protein	blastp_trinity:NLRC3_HUMAN|107;	pfam:NLRC3_HUMAN|107;	2
SteCoe_8727		Gamma tubulin interacting protein	Spc97_Spc98 domain protein	blastp_trinity:GCP4_MEDTR|94.7;	pfam:GCP4_MEDTR|94.7;	2
SteCoe_9308		MAPK family kinase	MAPK family kinase	blastp_trinity:ERK1_DICDI|384;	pfam:ERK1_DICDI|384;	2
SteCoe_9673		STIL	STIL_N domain protein	blastp_trinity:STIL_HUMAN|85.5;	pfam:STIL_HUMAN|85.5;	2
SteCoe_9704		hypothetical protein	hypothetical protein			2
SteCoe_9712	pumilio target	YAK subfamily kinase	YAK subfamily kinase	blastp_trinity:PPK15_SCHPO|387;	pfam:PPK15_SCHPO|387;	2
SteCoe_9930		SAS6	SAS-6_N domain protein	blastp_trinity:SAS6_DANRE|199;	pfam:SAS6_DANRE|199;	2
SteCoe_9939		FBB19 flagella basal body protein	hypothetical protein	blastp_trinity:TEX9_HUMAN|143;	pfam:TEX9_HUMAN|143;	2
SteCoe_9996		DNA polymerase epsilon subunit 1	DNA_pol_B_exo1 domain protein	blastp_trinity:DPOE1_ARATH|1475;	pfam:DPOE1_ARATH|1475;	2
SteCoe_10		RNA Demethylase	ARID domain protein	blastp_trinity:ALKB5_RAT|85.9;	pfam:ALKB5_RAT|85.9;	3
SteCoe_10424		APC3	ANAPC3 domain protein	blastp_trinity:CD27B_ARATH|68.9;	pfam:CD27B_ARATH|68.9;	3
SteCoe_10652	pumilio target	CAMK kinase	CAMKL family kinase	blastp_trinity:NIM1_HUMAN|222;	pfam:NIM1_HUMAN|222;	3
SteCoe_10743		hypothetical protein	hypothetical protein			3
SteCoe_10912		Dual specificity phosphatase	DSPn domain protein	blastp_trinity:CC14A_HUMAN|374;	pfam:CC14A_HUMAN|374;	3
SteCoe_11168		BLD10/CEP135	hypothetical protein	blastp_trinity:CP135_HUMAN|108;	pfam:CP135_HUMAN|108;	3
SteCoe_11369		hypothetical protein	hypothetical protein			3
SteCoe_11558		hypothetical protein	hypothetical protein			3
SteCoe_1173		hypothetical protein	hypothetical protein			3
SteCoe_11874		hypothetical protein	hypothetical protein			3
SteCoe_12021		DYRK kinase	DYRK family kinase	blastp_trinity:DYRK4_HUMAN|145;	pfam:DYRK4_HUMAN|145;	3
SteCoe_12037		Sperm-tail PG-rich repeat	hypothetical protein			3
SteCoe_12038		hypothetical protein	hypothetical protein	blastp_trinity:PIBF1_HUMAN|145;	pfam:PIBF1_HUMAN|145;	3
SteCoe_12054	unaffected in CHX	centrin	EF-hand_7 domain protein	blastp_trinity:CATR_SCHDU|248;	pfam:CATR_SCHDU|248;	3
SteCoe_12190	E2F target	cyclin	Cyclin	blastp_trinity:CCNA2_CHICK|106;	pfam:CCNA2_CHICK|106;	3
SteCoe_130		SHIPPO-rpt domain protein	SHIPPO-rpt domain protein			3
SteCoe_13830		PLDc_2 domain protein	PLDc_2 domain protein	blastp_trinity:PLD6_HUMAN|90.9;	pfam:PLD6_HUMAN|90.9;	3
SteCoe_13870		hypothetical protein	hypothetical protein			3
SteCoe_13943		Cnd2 domain protein	Cnd2 domain protein			3
SteCoe_13964		Major facilitator superfamily protein	MFS_1 domain protein	blastp_trinity:FLVC1_MOUSE|91.7;	pfam:FLVC1_MOUSE|91.7;	3
SteCoe_14675		hypothetical protein	hypothetical protein			3
SteCoe_14736		hypothetical protein	hypothetical protein			3
SteCoe_14923		hypothetical protein	hypothetical protein			3
SteCoe_14978	E2F target	SRPK family kinase	SRPK family kinase	blastp_trinity:DSK1_SCHPO|370;	pfam:DSK1_SCHPO|370;	3
SteCoe_15136		Zinc carboxypeptidase	Peptidase_M14 domain protein			3
SteCoe_152	pumilio target	BLD10/CEP135	hypothetical protein	blastp_trinity:CP135_DANRE|76.3;	pfam:CP135_DANRE|76.3;	3
SteCoe_15203		MORN domain protein	MORN domain protein			3
SteCoe_1541		Melibiase	Melibiase_2 domain protein			3
SteCoe_15518	unaffected in CHX	IFT52	ABC_transp_aux domain protein	blastp_trinity:IFT52_MOUSE|352;	pfam:IFT52_MOUSE|352;	3
SteCoe_15529		FAP164	Ank_2 domain protein			3
SteCoe_16100		POC12	B9-C2 domain protein			3
SteCoe_16297	unaffected in CHX	hypothetical protein	hypothetical protein			3
SteCoe_16773		hypothetical protein	hypothetical protein			3
SteCoe_17535	unaffected in CHX	hypothetical protein	hypothetical protein			3
SteCoe_17781		hypothetical protein	Homeobox domain protein			3
SteCoe_17800		hypothetical protein	hypothetical protein			3
SteCoe_17810		Ubiquitin-conjugating enzyme	UQ_con domain protein	blastp_trinity:UBC5_ARATH|201;	pfam:UBC5_ARATH|201;	3
SteCoe_17831		WD40 protein	WD40 domain protein	blastp_trinity:YY46_NOSS1|72.8;	pfam:YY46_NOSS1|72.8;	3
SteCoe_18153		hypothetical protein	hypothetical protein			3
SteCoe_18671		kinetochore protein Spc25, animal type	Spindle_Spc25 domain protein	blastp_trinity:SPC25_XENLA|48.9;	pfam:SPC25_XENLA|48.9;	3
SteCoe_18798		ULK family kinase	ULK family kinase			3
SteCoe_18814		AMPK subfamily kinase	AMPK subfamily kinase	blastp_trinity:KIN10_ARATH|319;	pfam:KIN10_ARATH|319;	3
SteCoe_19164		DYRK kinase	DYRK family kinase	blastp_trinity:DYRK4_MOUSE|213;	pfam:DYRK4_MOUSE|213;	3
SteCoe_19614		hypothetical protein	hypothetical protein			3
SteCoe_19766		hypothetical protein	hypothetical protein			3
SteCoe_19775		cation channel family protein	Ins145_P3_rec domain protein	blastp_trinity:ITPR1_MOUSE|109;	pfam:ITPR1_MOUSE|109;	3
SteCoe_20069		Guanylate-binding protei	GBP domain protein	blastp_trinity:GBP4_HUMAN|236;	pfam:GBP4_HUMAN|236;	3
SteCoe_20079		hypothetical protein	SAM_1 domain protein			3
SteCoe_20110		hypothetical protein	hypothetical protein			3
SteCoe_20890		hypothetical protein	hypothetical protein			3
SteCoe_2104		HSP70 domain protein	HSP70 domain protein	blastp_trinity:HS12B_HUMAN|271;	pfam:HS12B_HUMAN|271;	3
SteCoe_2128	E2F target	hypothetical protein	hypothetical protein			3
SteCoe_21317		hypothetical protein	hypothetical protein			3
SteCoe_21624		Cyclin	Cyclin			3
SteCoe_22434		hypothetical protein	hypothetical protein			3
SteCoe_22549		hypothetical protein	hypothetical protein			3
SteCoe_22784		Mre11	Metallophos domain protein			3
SteCoe_22864		POC16	DUF667 domain protein			3
SteCoe_22989		zf-RanBP domain protein	zf-RanBP domain protein			3
SteCoe_23234	unaffected in CHX	hypothetical protein	hypothetical protein			3
SteCoe_2338		hypothetical protein	hypothetical protein			3
SteCoe_23681		ERK subfamily kinase	ERK subfamily kinase	blastp_trinity:ERK1_DICDI|410;	pfam:ERK1_DICDI|410;	3
SteCoe_23728	pumilio target	centrin 3	EF-hand_7 domain protein	blastp_trinity:CETN3_HUMAN|207;	pfam:CETN3_HUMAN|207;	3
SteCoe_23751		hypothetical protein	hypothetical protein			3
SteCoe_23845		LRR domain protein	LRR_6 domain protein	blastp_trinity:INLI_LISMO|55.8;	pfam:INLI_LISMO|55.8;	3
SteCoe_24424		MOT43 motile cilia associated protein	MORN domain protein	blastp_trinity:RS10B_DANRE|94.7;	pfam:RS10B_DANRE|94.7;	3
SteCoe_24425		serine esterase	DUF3657 domain protein	blastp_trinity:F135B_XENLA|159;	pfam:F135B_XENLA|159;	3
SteCoe_24474		hypothetical protein	Cnd2 domain protein	blastp_trinity:CND2_ARATH|137;	pfam:CND2_ARATH|137;	3
SteCoe_24733		hypothetical protein	hypothetical protein			3
SteCoe_25219		hypothetical protein	hypothetical protein			3
SteCoe_25318		DNA repair helicase	DEAD_2 domain protein	blastp_trinity:CHL1_ASPCL|371;	pfam:CHL1_ASPCL|371;	3
SteCoe_25584		Tubulin-tyrosine ligase	TTL domain protein	blastp_trinity:TTLL5_MOUSE|333;	pfam:TTLL5_MOUSE|333;	3
SteCoe_25702		hypothetical protein	hypothetical protein			3
SteCoe_25703		hypothetical protein	hypothetical protein			3
SteCoe_25926		hypothetical protein	hypothetical protein			3
SteCoe_25927		membrane associated ring finger	RINGv domain protein	blastp_trinity:MARHA_RAT|58.5;	pfam:MARHA_RAT|58.5;	3
SteCoe_25933		hypothetical protein	DUF4586 domain protein			3
SteCoe_26063		APC subunit 8	ANAPC8 domain protein	blastp_trinity:CDC23_ARATH|367;	pfam:CDC23_ARATH|367;	3
SteCoe_2623		IFT52	hypothetical protein	blastp_trinity:IFT52_MOUSE|382;	pfam:IFT52_MOUSE|382;	3
SteCoe_26439		Rab family GTPase	Ras domain protein	blastp_trinity:RB11A_CHICK|283;	pfam:RB11A_CHICK|283;	3
SteCoe_2694		hypothetical protein	hypothetical protein			3
SteCoe_2719		hypothetical protein	hypothetical protein			3
SteCoe_27191		cohesin loading factor subunit SCC2	PHD domain protein	blastp_trinity:SCC2_ARATH|185;	pfam:SCC2_ARATH|185;	3
SteCoe_27220		hypothetical protein	hypothetical protein			3
SteCoe_27264		ULK family kinase	ULK family kinase	blastp_trinity:TIO_ARATH|192;	pfam:TIO_ARATH|192;	3
SteCoe_27470		hypothetical protein	hypothetical protein			3
SteCoe_27755		hypothetical protein	hypothetical protein			3
SteCoe_28576		katanin p60 catalytic subunit	AAA domain protein	blastp_trinity:KATL1_DANRE|454;	pfam:KATL1_DANRE|454;	3
SteCoe_28670		TPR_8 domain protein	TPR_8 domain protein			3
SteCoe_28803	unaffected in CHX	Wee1 like kinase	Wee1 like kinase	blastp_trinity:WEE1_ARATH|167;	pfam:WEE1_ARATH|167;	3
SteCoe_28884		kinesin family member	Kinesin domain protein	blastp_trinity:KIF15_STRPU|306;	pfam:KIF15_STRPU|306;	3
SteCoe_29410		CDK family kinase	CDK family kinase	blastp_trinity:CDK2_HUMAN|312;	pfam:CDK2_HUMAN|312;	3
SteCoe_29471		hypothetical protein	hypothetical protein			3
SteCoe_30493		FAP250/DRC2	NYD-SP28 domain protein	blastp_trinity:DRC2_CHLRE|311;	pfam:DRC2_CHLRE|311;	3
SteCoe_30604		hypothetical protein	hypothetical protein			3
SteCoe_30660		hypothetical protein	Homeobox domain protein			3
SteCoe_30950		hypothetical protein	zf-RanBP domain protein			3
SteCoe_31187		CTD small phosphatase-like protein 2	NIF domain protein	blastp_trinity:CTSL2_MOUSE|160;	pfam:CTSL2_MOUSE|160;	3
SteCoe_31535		hypothetical protein	hypothetical protein			3
SteCoe_31756		hypothetical protein	hypothetical protein			3
SteCoe_31816		PCNA	PCNA_N domain protein			3
SteCoe_31837		hypothetical protein	hypothetical protein			3
SteCoe_31852		ABC transporter	ABC_tran domain protein			3
SteCoe_32107		ARMC9/TOGARAM Joubert syndrome ciliary protein	hypothetical protein	blastp_trinity:ARMC9_HUMAN|261;	pfam:ARMC9_HUMAN|261;	3
SteCoe_32263		hypothetical protein	hypothetical protein			3
SteCoe_32381		RPGRIP1 Leber congenital amaurosis - related to Joubert and Meckel syndrom RPGRIP1L	C2-C2_1 domain protein	blastp_trinity:FTM_HUMAN|140;	pfam:FTM_HUMAN|140;	3
SteCoe_32383		WD REPEAT-CONTAINING PROTEIN 49	WD40 domain protein	blastp_trinity:Y2800_NOSS1|69.7;	pfam:Y2800_NOSS1|69.7;	3
SteCoe_3272		MKS3 meckel syndrome protein	Meckelin domain protein	blastp_trinity:MKS3_MOUSE|287;	pfam:MKS3_MOUSE|287;	3
SteCoe_32791		hypothetical protein	hypothetical protein			3
SteCoe_32966		separase	hypothetical protein	blastp_trinity:BIMB_EMENI|199;	pfam:BIMB_EMENI|199;	3
SteCoe_33500		hypothetical protein	hypothetical protein			3
SteCoe_33633		Vacuolar sorting-associated protein 13	hypothetical protein	blastp_trinity:VP13A_DICDI|65.9;	pfam:VP13A_DICDI|65.9;	3
SteCoe_33649		hypothetical protein	hypothetical protein			3
SteCoe_33830		hypothetical protein	hypothetical protein			3
SteCoe_34197		hypothetical protein	hypothetical protein			3
SteCoe_34259	unaffected in CHX	hypothetical protein	hypothetical protein	blastp_trinity:SUN1_MOUSE|72.8;	pfam:SUN1_MOUSE|72.8;	3
SteCoe_34276	pumilio target	Dual specificity phosphatase	hypothetical protein	blastp_trinity:MKP1_ARATH|177;	pfam:MKP1_ARATH|177;	3
SteCoe_34591		WDHD1 TULP3 interacting protin	hypothetical protein	blastp_trinity:WDHD1_XENLA|107;	pfam:WDHD1_XENLA|107;	3
SteCoe_34719		FAP267 tubulin tyrosine ligase	hypothetical protein	blastp_trinity:TTLL9_RAT|414;	pfam:TTLL9_RAT|414;	3
SteCoe_34839		CDK kinase regulatory subunit	hypothetical protein	blastp_trinity:CKS1_ORYSJ|113;	pfam:CKS1_ORYSJ|113;	3
SteCoe_35428		voltage gated calcium channel	hypothetical protein	blastp_trinity:SCN1_HETBL|152;	pfam:SCN1_HETBL|152;	3
SteCoe_35824		RCC1	hypothetical protein	blastp_trinity:HERC2_HUMAN|79.7;	pfam:HERC2_HUMAN|79.7;	3
SteCoe_35957		hypothetical protein	hypothetical protein			3
SteCoe_36236		CK1 protein kinase	CK1 kinase	blastp_trinity:KC1_PLAF7|201;	pfam:KC1_PLAF7|201;	3
SteCoe_36285		DRC3	hypothetical protein	blastp_trinity:CNTRL_HUMAN|146;	pfam:CNTRL_HUMAN|146;	3
SteCoe_36748		hypothetical protein	hypothetical protein			3
SteCoe_36757		RNA recognition motif protein	hypothetical protein	blastp_trinity:SYC_SYNJB|53.5;	pfam:SYC_SYNJB|53.5;	3
SteCoe_37096		hypothetical protein	FAM91_N domain protein	blastp_trinity:F91A1_MOUSE|113;	pfam:F91A1_MOUSE|113;	3
SteCoe_37707		hypothetical protein	hypothetical protein			3
SteCoe_38074		RAB11	Ras domain protein	blastp_trinity:RB11A_CHICK|283;	pfam:RB11A_CHICK|283;	3
SteCoe_38344		Cyclin	Cyclin			3
SteCoe_3904		hypothetical protein	hypothetical protein	blastp_trinity:FBF1_MOUSE|66.2;	pfam:FBF1_MOUSE|66.2;	3
SteCoe_4315		EF-hand_7 domain protein	EF-hand_7 domain protein	blastp_trinity:CATR_SCHDU|183;	pfam:CATR_SCHDU|183;	3
SteCoe_4454		NEK family kinase	NEK family kinase	blastp_trinity:NEK1_HUMAN|344;	pfam:NEK1_HUMAN|344;	3
SteCoe_4528		hypothetical protein	hypothetical protein			3
SteCoe_4933		hypothetical protein	hypothetical protein			3
SteCoe_4943		Methyltransferase domain protein	Methyltransf_11 domain protein	blastp_trinity:MET13_MOUSE|126;	pfam:MET13_MOUSE|126;	3
SteCoe_4957		B-box zinc finger protein	zf-B_box domain protein	blastp_trinity:TRI37_HUMAN|397;	pfam:TRI37_HUMAN|397;	3
SteCoe_4980		hypothetical protein	hypothetical protein			3
SteCoe_5650		hypothetical protein	hypothetical protein			3
SteCoe_5964		hypothetical protein	hypothetical protein			3
SteCoe_6059		ODA7 outer dynein arm assembly factor (cytoplasmic)	LRR_4 domain protein	blastp_trinity:DAAF1_MOUSE|220;	pfam:DAAF1_MOUSE|220;	3
SteCoe_6127		hypothetical protein	hypothetical protein			3
SteCoe_6223		CEP350 centriole protein involved in ciliogenesis	DUF4378 domain protein	blastp_trinity:ZAN_HUMAN|55.8;	pfam:ZAN_HUMAN|55.8;	3
SteCoe_6418		hypothetical protein	hypothetical protein			3
SteCoe_674		Anaphase promoting complex ANAPC8	ANAPC8 domain protein	blastp_trinity:CDC23_ARATH|368;	pfam:CDC23_ARATH|368;	3
SteCoe_7015		CTD small phosphatase-like protein 2	NIF domain protein	blastp_trinity:CTSL2_HUMAN|159;	pfam:CTSL2_HUMAN|159;	3
SteCoe_7106		AGC kinase	AGC kinase	blastp_trinity:PK3_DICDI|205;	pfam:PK3_DICDI|205;	3
SteCoe_7202		MORN domain PI5 kinase	MORN domain protein	blastp_trinity:PI5K2_ARATH|114;	pfam:PI5K2_ARATH|114;	3
SteCoe_725		hypothetical protein	hypothetical protein			3
SteCoe_7271		hypothetical protein	ADIP domain protein	blastp_trinity:ADIPB_XENLA|68.6;	pfam:ADIPB_XENLA|68.6;	3
SteCoe_7455		hypothetical protein	hypothetical protein			3
SteCoe_7568	unaffected in CHX	hypothetical protein	hypothetical protein			3
SteCoe_8699		hypothetical protein	hypothetical protein			3
SteCoe_8941		RCC1	RCC1 domain protein	blastp_trinity:HERC2_HUMAN|87.8;	pfam:HERC2_HUMAN|87.8;	3
SteCoe_9313		CEP44	CEP44 domain protein	blastp_trinity:CEP44_BOVIN|112;	pfam:CEP44_BOVIN|112;	3
SteCoe_9761		SERINE/THREONINE-PROTEIN PHOSPHATASE 2A REGULATORY SUBUNIT	hypothetical protein	blastp_trinity:P2R3C_BOVIN|408;	pfam:P2R3C_BOVIN|408;	3
SteCoe_9841		NEK family kinase	NEK family kinase			3
SteCoe_10532		zinc finger domain protein	zf-C2H2_4 domain protein	blastp_trinity:OZF_MOUSE|85.9;	pfam:OZF_MOUSE|85.9;	4
SteCoe_1133		hypothetical protein	hypothetical protein			4
SteCoe_11822		hypothetical protein	DOT1 domain protein			4
SteCoe_12120		Adenylate/Guanylate Cyclase	Adenylate/Guanylate Cyclase	blastp_trinity:GEFW_DICDI|82.4;	pfam:GEFW_DICDI|82.4;	4
SteCoe_1228		hypothetical protein	hypothetical protein			4
SteCoe_12857		EF-hand_7 domain protein	EF-hand_7 domain protein			4
SteCoe_13154		hypothetical protein	IQ domain protein			4
SteCoe_13619		hypothetical protein	hypothetical protein			4
SteCoe_13685		MORN domain protein	MORN domain protein			4
SteCoe_14699		hypothetical protein	hypothetical protein			4
SteCoe_15680		LRRC45	LRR_6 domain protein	blastp_trinity:LRC45_MOUSE|126;	pfam:LRC45_MOUSE|126;	4
SteCoe_158		kelch domain	Kelch_3 domain protein	blastp_trinity:TEA1_SCHPO|108;	pfam:TEA1_SCHPO|108;	4
SteCoe_1580		FAP16/FAP44	HELP domain protein	blastp_trinity:CTX80_EUPOC|484;	pfam:CTX80_EUPOC|484;	4
SteCoe_16183		Adenylate/Guanylate Cyclase	Adenylate/Guanylate Cyclase	blastp_trinity:CYAA_ANACY|77.0;	pfam:CYAA_ANACY|77.0;	4
SteCoe_16758		hypothetical protein	hypothetical protein			4
SteCoe_16786		hypothetical protein	hypothetical protein			4
SteCoe_1687		Myb-like DNA-binding domain	Myb_DNA-binding domain protein	blastp_trinity:MY118_ARATH|123;	pfam:MY118_ARATH|123;	4
SteCoe_17323		PH domain protein	PH domain protein			4
SteCoe_17621		hypothetical protein	hypothetical protein			4
SteCoe_17786		hypothetical protein	hypothetical protein			4
SteCoe_1807	E2F target	Akt family kinase	Akt family kinase			4
SteCoe_18447		GAS2 domain protein	GAS2 domain protein			4
SteCoe_18544		hypothetical protein	GAS2 domain protein			4
SteCoe_18864		WD40 repeat protein	WD40 domain protein	blastp_trinity:YY46_NOSS1|100;	pfam:YY46_NOSS1|100;	4
SteCoe_19258		kinesin family member	Kinesin domain protein	blastp_trinity:KIF5_DICDI|254;	pfam:KIF5_DICDI|254;	4
SteCoe_19469		Tubulin-tyrosine ligase	TTL domain protein	blastp_trinity:TTLL5_MOUSE|354;	pfam:TTLL5_MOUSE|354;	4
SteCoe_21350		hypothetical protein	hypothetical protein			4
SteCoe_22297		CDPK-like predicted pseudokinase	CDPK-like predicted pseudokinase	blastp_trinity:CDPK1_PLAFK|232;	pfam:CDPK1_PLAFK|232;	4
SteCoe_22756		EF-hand_7 domain protein	EF-hand_7 domain protein	blastp_trinity:CAPSL_MOUSE|158;	pfam:CAPSL_MOUSE|158;	4
SteCoe_22814		hypothetical protein	hypothetical protein			4
SteCoe_23076		E2F/DP dimerization partner	E2F_TDP domain protein			4
SteCoe_23320	unaffected in CHX	hypothetical protein	SHIPPO-rpt domain protein			4
SteCoe_23385		hypothetical protein	hypothetical protein			4
SteCoe_23602		GAS2 domain protein	GAS2 domain protein			4
SteCoe_23673		hypothetical protein	hypothetical protein			4
SteCoe_23847		hypothetical protein	START domain protein			4
SteCoe_23966		EF-hand_7 domain protein	EF-hand_7 domain protein	blastp_trinity:CAPSL_MOUSE|160;	pfam:CAPSL_MOUSE|160;	4
SteCoe_24990		PARP2	WGR domain protein			4
SteCoe_25063		GAS2 domain protein	GAS2 domain protein			4
SteCoe_25093		Dual specificity phosphatase	DSPc domain protein	blastp_trinity:DUSK4_DROME|80.9;	pfam:DUSK4_DROME|80.9;	4
SteCoe_25515		Thioredoxin-like	Thioredoxin_8 domain protein	blastp_trinity:NXN_MOUSE|58.2;	pfam:NXN_MOUSE|58.2;	4
SteCoe_25625		GAS2 domain protein	GAS2 domain protein			4
SteCoe_26238		hypothetical protein	hypothetical protein			4
SteCoe_26756		CDPK family kinase	CDPK family kinase	blastp_trinity:CDPK1_PLAFK|374;	pfam:CDPK1_PLAFK|374;	4
SteCoe_28133		hypothetical protein	hypothetical protein			4
SteCoe_28368		GAS2 domain protein	GAS2 domain protein			4
SteCoe_29163		hypothetical protein	hypothetical protein			4
SteCoe_29664	anticorrelated in CHX	alpha-beta hydrolase	Abhydro_lipase domain protein			4
SteCoe_29753		hypothetical protein	hypothetical protein			4
SteCoe_29887		TPR repeat	RPAP3_C domain protein			4
SteCoe_30134		hypothetical protein	hypothetical protein			4
SteCoe_30681		CDPK-like predicted pseudokinase	CDPK-like predicted pseudokinase	blastp_trinity:CDPK1_PLAFK|305;	pfam:CDPK1_PLAFK|305;	4
SteCoe_31188		hypothetical protein	PLAC8 domain protein			4
SteCoe_31627		arrestin domain protein	Arrestin_N domain protein	blastp_trinity:ARRD5_HUMAN|58.2;	pfam:ARRD5_HUMAN|58.2;	4
SteCoe_31969		DUF1126 domain protein	DUF1126 domain protein	blastp_trinity:EFHC1_HUMAN|314;	pfam:EFHC1_HUMAN|314;	4
SteCoe_32593		serine kinase involved in rRNa processing	RIO family kinase	blastp_trinity:RIOK1_HUMAN|368;	pfam:RIOK1_HUMAN|368;	4
SteCoe_35896		PACRG	hypothetical protein	blastp_trinity:PACRG_MOUSE|295;	pfam:PACRG_MOUSE|295;	4
SteCoe_3609		hypothetical protein	SHIPPO-rpt domain protein			4
SteCoe_3950		hypothetical protein	hypothetical protein			4
SteCoe_4319	pumilio target	Myb-like DNA-binding domain	Myb_DNA-binding domain protein	blastp_trinity:MB3R5_ARATH|129;	pfam:MB3R5_ARATH|129;	4
SteCoe_4939		hypothetical protein	hypothetical protein			4
SteCoe_5146		hypothetical protein	IQ domain protein			4
SteCoe_5147		hypothetical protein	hypothetical protein			4
SteCoe_521		Hsp70	HSP70 domain protein			4
SteCoe_5218		hypothetical protein	DUF4455 domain protein			4
SteCoe_5253		hypothetical protein	hypothetical protein			4
SteCoe_559		PF16	Arm domain protein			4
SteCoe_6188		hypothetical protein	hypothetical protein			4
SteCoe_6542		Piwi domain protein	PAZ domain protein	blastp_trinity:PIWL1_CHICK|344;	pfam:PIWL1_CHICK|344;	4
SteCoe_7209		Calpain family cysteine protease	Peptidase_C2 domain protein			4
SteCoe_7235		Ammonium Transporter	Ammonium_transp domain protein			4
SteCoe_7355		TPR_8 domain protein	TPR_8 domain protein			4
SteCoe_7479		EF-hand_5 domain protein	EF-hand_5 domain protein	blastp_trinity:CML33_ARATH|52.8;	pfam:CML33_ARATH|52.8;	4
SteCoe_7704		hypothetical protein	hypothetical protein			4
SteCoe_8120		hypothetical protein	hypothetical protein			4
SteCoe_8618		hypothetical protein	hypothetical protein			4
SteCoe_8981		hypothetical protein	hypothetical protein			4
SteCoe_9211		hypothetical protein	hypothetical protein			4
SteCoe_970		hypothetical protein	hypothetical protein			4
SteCoe_10366		TPR repeat protein	TPR_8 domain protein	blastp_trinity:SRFR1_ARATH|54.7;	pfam:SRFR1_ARATH|54.7;	5
SteCoe_10658		hypothetical protein	hypothetical protein			5
SteCoe_10836		hypothetical protein	hypothetical protein			5
SteCoe_1089		cofactor of APC complex (CDH1)	ANAPC4_WD40 domain protein			5
SteCoe_11023		hypothetical protein	hypothetical protein			5
SteCoe_11594		hypothetical protein	KIAA1430 domain protein			5
SteCoe_11641		CDPK family kinase	CDPK family kinase	blastp_trinity:CDPK4_PLAYO|402;	pfam:CDPK4_PLAYO|402;	5
SteCoe_11891	unaffected in CHX	hypothetical protein	hypothetical protein			5
SteCoe_1230		D-alanyl-D-alanine carboxypeptidase	Peptidase_S11 domain protein	blastp_trinity:DACB_BACSU|129;	pfam:DACB_BACSU|129;	5
SteCoe_12610		calcium activated chloride channel	Anoctamin domain protein	blastp_trinity:ANO10_HUMAN|189;	pfam:ANO10_HUMAN|189;	5
SteCoe_12673		POC16	DUF667 domain protein			5
SteCoe_13767		hypothetical protein	hypothetical protein			5
SteCoe_14744		hypothetical protein	hypothetical protein			5
SteCoe_14862		myosin V	Myosin_head domain protein	blastp_trinity:Y4A0_ENCCU|85.9;	pfam:Y4A0_ENCCU|85.9;	5
SteCoe_16024		GNAT acetyltransferase 2	DUF1726 domain protein	blastp_trinity:NAT10_DICDI|812;	pfam:NAT10_DICDI|812;	5
SteCoe_16883		hypothetical protein	hypothetical protein			5
SteCoe_1740		Zinc transporter	Zip domain protein	blastp_trinity:S39A3_XENTR|94.7;	pfam:S39A3_XENTR|94.7;	5
SteCoe_17446		hypothetical protein	hypothetical protein			5
SteCoe_1748	pumilio target	EF-hand_7 domain protein	EF-hand_7 domain protein	blastp_trinity:EFCB6_MOUSE|64.7;	pfam:EFCB6_MOUSE|64.7;	5
SteCoe_17874	unaffected in CHX	hypothetical protein	hypothetical protein			5
SteCoe_18686		hypothetical protein	hypothetical protein			5
SteCoe_19042		ef hand 7 domain	EF-hand_7 domain protein	blastp_trinity:EFCB6_MOUSE|63.2;	pfam:EFCB6_MOUSE|63.2;	5
SteCoe_20054		hypothetical protein	hypothetical protein			5
SteCoe_20372		hypothetical protein	hypothetical protein			5
SteCoe_20373		mitochondrial carrier protein	Mito_carr domain protein	blastp_trinity:MPCP_MOUSE|278;	pfam:MPCP_MOUSE|278;	5
SteCoe_21208		Glutamine amidotransferase	GATase_6 domain protein	blastp_trinity:GLMS_PYRFU|355;	pfam:GLMS_PYRFU|355;	5
SteCoe_21613		EF-hand_7 domain protein	EF-hand_7 domain protein	blastp_trinity:CAPSL_MOUSE|164;	pfam:CAPSL_MOUSE|164;	5
SteCoe_21749		hypothetical protein	hypothetical protein			5
SteCoe_22175		hypothetical protein	hypothetical protein			5
SteCoe_22239		hypothetical protein	hypothetical protein			5
SteCoe_23033		hypothetical protein	START domain protein			5
SteCoe_23110		hypothetical protein	hypothetical protein			5
SteCoe_24483		Aminotransferase class IV	Aminotran_4 domain protein	blastp_trinity:BCAT_DICDI|331;	pfam:BCAT_DICDI|331;	5
SteCoe_24756		hypothetical protein	hypothetical protein			5
SteCoe_25066		hypothetical protein	GAS2 domain protein			5
SteCoe_25311		hypothetical protein	hypothetical protein			5
SteCoe_26464		hypothetical protein	SHIPPO-rpt domain protein			5
SteCoe_2698		PLAC8 domain protein	PLAC8 domain protein			5
SteCoe_27457		CLASP_N domain protein	CLASP_N domain protein			5
SteCoe_27667		WD40 repeat protein	WD40 domain protein	blastp_trinity:YY46_NOSS1|132;	pfam:YY46_NOSS1|132;	5
SteCoe_27884		MORN domain PI5 kinase	MORN domain protein	blastp_trinity:PI5K8_ARATH|80.9;	pfam:PI5K8_ARATH|80.9;	5
SteCoe_28122		MORN domain PI5 kinase	MORN domain protein	blastp_trinity:PI5K2_ARATH|55.8;	pfam:PI5K2_ARATH|55.8;	5
SteCoe_28739		ELFV amino acid dehydrogenase	ELFV_dehydrog_N domain protein	blastp_trinity:DHE3_DICDI|434;	pfam:DHE3_DICDI|434;	5
SteCoe_28965		CAMK	CAMK related kinase	blastp_trinity:CDPK4_PLAF7|244;	pfam:CDPK4_PLAF7|244;	5
SteCoe_29475		hypothetical protein	hypothetical protein			5
SteCoe_29828		EF-hand_7 domain protein	EF-hand_7 domain protein	blastp_trinity:CAYP1_HUMAN|157;	pfam:CAYP1_HUMAN|157;	5
SteCoe_29925		hypothetical protein	SHIPPO-rpt domain protein			5
SteCoe_30012	E2F target	hypothetical protein	zf-LITAF-like domain protein			5
SteCoe_30428		DNA polymerase family B	DNA_pol_B_exo1 domain protein			5
SteCoe_3080		Methyltransf_11 domain protein	Methyltransf_11 domain protein			5
SteCoe_31177		hypothetical protein	hypothetical protein	blastp_trinity:NOD1_HUMAN|60.8;	pfam:NOD1_HUMAN|60.8;	5
SteCoe_31576		hypothetical protein	cNMP_binding domain protein			5
SteCoe_32015		hypothetical protein	SAS-6_N domain protein			5
SteCoe_32190	unaffected in CHX	GSK family kinase	GSK family kinase	blastp_trinity:GSK2_ORYSJ|323;	pfam:GSK2_ORYSJ|323;	5
SteCoe_32433		hypothetical protein	hypothetical protein			5
SteCoe_32705		hypothetical protein	hypothetical protein			5
SteCoe_33617		hypothetical protein	hypothetical protein			5
SteCoe_33839		hypothetical protein	hypothetical protein			5
SteCoe_34239	unaffected in CHX	MORN repeat	hypothetical protein			5
SteCoe_34435		ammonium transporter	hypothetical protein	blastp_trinity:RHCG_PIG|296;	pfam:RHCG_PIG|296;	5
SteCoe_34474	unaffected in CHX	hypothetical protein	hypothetical protein			5
SteCoe_34487		CDPK family kinase	CDPK-like predicted pseudokinase	blastp_trinity:CDPK1_PLAFK|307;	pfam:CDPK1_PLAFK|307;	5
SteCoe_35007		hypothetical protein	hypothetical protein			5
SteCoe_35040	pumilio target	FAP77	hypothetical protein	blastp_trinity:CFA77_CHLRE|52.0;	pfam:CFA77_CHLRE|52.0;	5
SteCoe_35339		cyclic nucleotide phosphodiesterase	hypothetical protein	blastp_trinity:PDE4D_MOUSE|181;	pfam:PDE4D_MOUSE|181;	5
SteCoe_35391		Zinc carboxypeptidase	hypothetical protein			5
SteCoe_35879		hypothetical protein	hypothetical protein			5
SteCoe_3605		hypothetical protein	hypothetical protein			5
SteCoe_36556		ef-hand domain 8	EF-hand_8 domain protein	blastp_trinity:CDPK9_ARATH|52.0;	pfam:CDPK9_ARATH|52.0;	5
SteCoe_36849		hypothetical protein	hypothetical protein			5
SteCoe_37037		Guanylate-binding protein	GBP domain protein	blastp_trinity:GBP2_MOUSE|234;	pfam:GBP2_MOUSE|234;	5
SteCoe_3854		N6-adenineMlase domain protein	N6-adenineMlase domain protein			5
SteCoe_3913		EF-hand_8 domain protein	EF-hand_8 domain protein			5
SteCoe_4395		hypothetical protein	hypothetical protein			5
SteCoe_4476		hypothetical protein	hypothetical protein			5
SteCoe_4533		Rieske monooxygenase	Rieske domain protein	blastp_trinity:DAF36_CAEEL|149;	pfam:DAF36_CAEEL|149;	5
SteCoe_4928		glutathione S-transferase	GST_N domain protein	blastp_trinity:GST_NOTSL|109;	pfam:GST_NOTSL|109;	5
SteCoe_5515		zf-RanBP domain protein	zf-RanBP domain protein			5
SteCoe_5731		hypothetical protein	hypothetical protein			5
SteCoe_7107		hypothetical protein	hypothetical protein	blastp_trinity:FAZ1_TRYB9|90.5;		5
SteCoe_7137	pumilio target	CDPK family kinase	CDPK-like predicted pseudokinase	blastp_trinity:CDPK1_PLAFK|318;	pfam:CDPK1_PLAFK|318;	5
SteCoe_7293		SHIPPO-rpt domain protein	SHIPPO-rpt domain protein	blastp_trinity:OD3L2_MOUSE|65.9;	pfam:OD3L2_MOUSE|65.9;	5
SteCoe_7579		hypothetical protein	GAS2 domain protein			5
SteCoe_7931		hypothetical protein	SHIPPO-rpt domain protein			5
SteCoe_8992		hypothetical protein	hypothetical protein			5
SteCoe_9173		hypothetical protein	hypothetical protein			5
SteCoe_9427		hypothetical protein	hypothetical protein			5
SteCoe_9538		hypothetical protein	hypothetical protein			5
