# Supplementary material for: Modular, cascade-like transcriptional program of regeneration in Stentor
Source: eLife. 2022 Aug 4;11:e80778. doi: 10.7554/eLife.80778 (PMC9371601; doi:10.7554/eLife.80778)
Supplement: Supplementary file 2. [file elife-80778-supp2.xlsx]

## Sheet: Sheet1
Gene	cycloheximide_correlation	manual.annotation	StentorDB_Description	blastp_trinity	pfam	Cluster
SteCoe_10021			hypothetical protein	blastp_trinity:NA	pfam:	1
SteCoe_1005			hypothetical protein	blastp_trinity:NA	pfam:	1
SteCoe_10120			WD40 domain protein	blastp_trinity:AT18D_ARATH|149;	pfam:AT18D_ARATH|149;	1
SteCoe_10139			Aminotran_4 domain protein	blastp_trinity:BCAT_DICDI|393;	pfam:BCAT_DICDI|393;	1
SteCoe_10155			Peptidase_C1 domain protein	blastp_trinity:CATB2_GIAIN|194;	pfam:CATB2_GIAIN|194;	1
SteCoe_10231			HSP70 domain protein	blastp_trinity:HSP7C_PETHY|813;	pfam:HSP7C_PETHY|813;	1
SteCoe_10277			Aha1_N domain protein	blastp_trinity:AHSA1_MOUSE|50.8;	pfam:AHSA1_MOUSE|50.8;	1
SteCoe_10278			hypothetical protein	blastp_trinity:NA	pfam:	1
SteCoe_10473			PH domain protein	blastp_trinity:NA	pfam:	1
SteCoe_10544			FHA domain protein	blastp_trinity:NA	pfam:	1
SteCoe_10560			kinase domain containing protein	blastp_trinity:YODA_ARATH|87.8;	pfam:YODA_ARATH|87.8;	1
SteCoe_10728			Carb_anhydrase domain protein	blastp_trinity:ATCA8_ARATH|99.0;	pfam:ATCA8_ARATH|99.0;	1
SteCoe_10730			UBA_4 domain protein	blastp_trinity:FAF2B_XENLA|77.0;	pfam:FAF2B_XENLA|77.0;	1
SteCoe_10757			hypothetical protein			1
SteCoe_10767			Amidohydro_1 domain protein	blastp_trinity:ALLB_STRCO|110;	pfam:ALLB_STRCO|110;	1
SteCoe_10828			WD40 domain protein	blastp_trinity:YY46_NOSS1|122;	pfam:YY46_NOSS1|122;	1
SteCoe_10869			hypothetical protein			1
SteCoe_10899			DUF3657 domain protein			1
SteCoe_10955	high	DUF1015 domain	DUF1015 domain protein	blastp_trinity:NA	pfam:	1
SteCoe_10979			EF-hand_6 domain protein	blastp_trinity:CATR5_PARTE|164;	pfam:CATR5_PARTE|164;	1
SteCoe_10996			TPH domain protein			1
SteCoe_11015			Kinesin domain protein	blastp_trinity:KINH_SYNRA|60.5;	pfam:KINH_SYNRA|60.5;	1
SteCoe_11030			WD40 domain protein	blastp_trinity:YY46_NOSS1|120;	pfam:YY46_NOSS1|120;	1
SteCoe_11063			TRM domain protein	blastp_trinity:TRM1_HUMAN|259;	pfam:TRM1_HUMAN|259;	1
SteCoe_11086			VWA domain protein	blastp_trinity:UBC4_MIMIV|193;	pfam:UBC4_MIMIV|193;	1
SteCoe_11101			SAPS domain protein	blastp_trinity:PP6R3_CHICK|127;	pfam:PP6R3_CHICK|127;	1
SteCoe_11122			CK1 kinase			1
SteCoe_11132			VWA domain protein	blastp_trinity:Y103_SYNY3|84.0;	pfam:Y103_SYNY3|84.0;	1
SteCoe_11178			DEAD domain protein	blastp_trinity:RH6_ORYSJ|593;	pfam:RH6_ORYSJ|593;	1
SteCoe_11215			ArfGap domain protein	blastp_trinity:ARFG3_MOUSE|87.0;	pfam:ARFG3_MOUSE|87.0;	1
SteCoe_11270			hypothetical protein			1
SteCoe_11321			Thiolase_N domain protein	blastp_trinity:THIB_CANTR|199;	pfam:THIB_CANTR|199;	1
SteCoe_11430			AlaDh_PNT_N domain protein	blastp_trinity:AASS_ARATH|305;	pfam:AASS_ARATH|305;	1
SteCoe_11548			ATP-grasp_2 domain protein	blastp_trinity:SUCB1_DICDI|374;	pfam:SUCB1_DICDI|374;	1
SteCoe_11638			hypothetical protein	blastp_trinity:NA	pfam:	1
SteCoe_11644			hypothetical protein			1
SteCoe_11702			hypothetical protein	blastp_trinity:PI5PA_MOUSE|92.4;	pfam:PI5PA_MOUSE|92.4;	1
SteCoe_11706			hypothetical protein			1
SteCoe_11727	high		Dynamin_N domain protein	blastp_trinity:VPS1_YEAST|494;	pfam:VPS1_YEAST|494;	1
SteCoe_11728			WD40 domain protein	blastp_trinity:YY46_NOSS1|184;	pfam:YY46_NOSS1|184;	1
SteCoe_11765			Ras domain protein	blastp_trinity:RAB31_HUMAN|189;	pfam:RAB31_HUMAN|189;	1
SteCoe_11850			EF-hand_6 domain protein	blastp_trinity:UBP34_HUMAN|245;	pfam:UBP34_HUMAN|245;	1
SteCoe_11908			hypothetical protein	blastp_trinity:NA	pfam:	1
SteCoe_12006			STIL_N domain protein	blastp_trinity:STIL_HUMAN|89.4;	pfam:STIL_HUMAN|89.4;	1
SteCoe_12019			HSF_DNA-bind domain protein	blastp_trinity:HSF_DROME|62.8;	pfam:HSF_DROME|62.8;	1
SteCoe_12103			Aminotran_3 domain protein	blastp_trinity:OAT_DROME|519;	pfam:OAT_DROME|519;	1
SteCoe_12106			UPF1_Zn_bind domain protein	blastp_trinity:RENT1_HUMAN|116;	pfam:RENT1_HUMAN|116;	1
SteCoe_1212			UCH domain protein	blastp_trinity:UBP24_MOUSE|76.3;	pfam:UBP24_MOUSE|76.3;	1
SteCoe_12167			GDI domain protein	blastp_trinity:GDI1_SCHPO|459;	pfam:GDI1_SCHPO|459;	1
SteCoe_12247			hypothetical protein			1
SteCoe_12270			MORN domain protein	blastp_trinity:PI5K8_ARATH|66.6;	pfam:PI5K8_ARATH|66.6;	1
SteCoe_12324			GAF domain protein			1
SteCoe_12525			hypothetical protein	blastp_trinity:PAS1_ARATH|97.8;	pfam:PAS1_ARATH|97.8;	1
SteCoe_12579			hypothetical protein			1
SteCoe_12761			UQ_con domain protein	blastp_trinity:UBC17_CAEEL|96.7;	pfam:UBC17_CAEEL|96.7;	1
SteCoe_12790			2-Hacid_dh domain protein	blastp_trinity:SERA_PIG|208;	pfam:SERA_PIG|208;	1
SteCoe_12820			Aurora family kinase with zf-MYND domain			1
SteCoe_1285			GST_N_3 domain protein	blastp_trinity:GSTT2_RAT|131;	pfam:GSTT2_RAT|131;	1
SteCoe_12905			hypothetical protein			1
SteCoe_12941			EF-hand_8 domain protein	blastp_trinity:NA	pfam:	1
SteCoe_12965			hypothetical protein	blastp_trinity:NA	pfam:	1
SteCoe_12980			hypothetical protein	blastp_trinity:NA	pfam:	1
SteCoe_12999			hypothetical protein			1
SteCoe_1302			PGI domain protein	blastp_trinity:G6PI_OENSH|564;	pfam:G6PI_OENSH|564;	1
SteCoe_13044			hypothetical protein	blastp_trinity:NA	pfam:	1
SteCoe_13185			MORN domain protein	blastp_trinity:PI5K8_ARATH|54.7;	pfam:PI5K8_ARATH|54.7;	1
SteCoe_132	high		hypothetical protein	blastp_trinity:NA	pfam:	1
SteCoe_13323			Mito_carr domain protein	blastp_trinity:UCP3_CANLF|68.6;	pfam:UCP3_CANLF|68.6;	1
SteCoe_13524			hypothetical protein	blastp_trinity:NA	pfam:	1
SteCoe_1361			hypothetical protein	blastp_trinity:NA	pfam:	1
SteCoe_13624			His_Phos_1 domain protein	blastp_trinity:GPMA_METI4|210;	pfam:GPMA_METI4|210;	1
SteCoe_13659			hypothetical protein	blastp_trinity:FKB62_ARATH|110;	pfam:FKB62_ARATH|110;	1
SteCoe_13722			Aldedh domain protein	blastp_trinity:AL3A2_HUMAN|362;	pfam:AL3A2_HUMAN|362;	1
SteCoe_13738			WD40 domain protein	blastp_trinity:YY46_NOSS1|145;	pfam:YY46_NOSS1|145;	1
SteCoe_13877	high		Carboxyl_trans domain protein	blastp_trinity:PCCB_PIG|649;	pfam:PCCB_PIG|649;	1
SteCoe_13900			hypothetical protein	blastp_trinity:NA	pfam:	1
SteCoe_13947			Kinesin domain protein	blastp_trinity:KINH_SYNRA|343;	pfam:KINH_SYNRA|343;	1
SteCoe_14020			CDPK family kinase	blastp_trinity:CDPK1_PLAFK|412;	pfam:CDPK1_PLAFK|412;	1
SteCoe_14075			zf-C2H2 domain protein			1
SteCoe_14094			hypothetical protein			1
SteCoe_14110			hypothetical protein			1
SteCoe_14153			kinase domain containing protein	blastp_trinity:NRKB_TRYBB|86.3;	pfam:NRKB_TRYBB|86.3;	1
SteCoe_14186			hypothetical protein	blastp_trinity:FRAS1_HUMAN|63.9;	pfam:NA	1
SteCoe_1423	high		MMR_HSR1 domain protein	blastp_trinity:ERF3_DEBHA|114;	pfam:ERF3_DEBHA|114;	1
SteCoe_14307			hypothetical protein			1
SteCoe_14363			hypothetical protein			1
SteCoe_1437			Aurora family kinase	blastp_trinity:IPL1_DEBHA|211;	pfam:IPL1_DEBHA|211;	1
SteCoe_1439			Bac_surface_Ag domain protein	blastp_trinity:NA	pfam:	1
SteCoe_14408			hypothetical protein	blastp_trinity:NA	pfam:	1
SteCoe_14412			WASH-7_N domain protein	blastp_trinity:WASC4_DICDI|600;	pfam:WASC4_DICDI|600;	1
SteCoe_14425			NIF domain protein	blastp_trinity:CTSL2_DICDI|171;	pfam:CTSL2_DICDI|171;	1
SteCoe_14469			DUF726 domain protein	blastp_trinity:TMCO4_MOUSE|137;	pfam:TMCO4_MOUSE|137;	1
SteCoe_14499			GATase domain protein	blastp_trinity:GGP4_ARATH|87.0;	pfam:GGP4_ARATH|87.0;	1
SteCoe_14728			CAP_GLY domain protein	blastp_trinity:DCTN1_CHICK|130;	pfam:DCTN1_CHICK|130;	1
SteCoe_14765			hypothetical protein	blastp_trinity:MS5_ARATH|68.2;	pfam:MS5_ARATH|68.2;	1
SteCoe_1481			ANAPC4_WD40 domain protein	blastp_trinity:WDR5_XENTR|77.8;	pfam:WDR5_XENTR|77.8;	1
SteCoe_14951			PNP_UDP_1 domain protein	blastp_trinity:DEOD_OCEIH|74.3;	pfam:DEOD_OCEIH|74.3;	1
SteCoe_15048			DEAD domain protein	blastp_trinity:DEXHE_ARATH|1612;	pfam:DEXHE_ARATH|1612;	1
SteCoe_15126			Gln-synt_N domain protein	blastp_trinity:GLNA_VIGAC|435;	pfam:GLNA_VIGAC|435;	1
SteCoe_15139			GalKase_gal_bdg domain protein	blastp_trinity:GALK_DICDI|290;	pfam:GALK_DICDI|290;	1
SteCoe_15395			DnaJ domain protein	blastp_trinity:DNJC8_RAT|100;	pfam:DNJC8_RAT|100;	1
SteCoe_15401			Kinesin domain protein	blastp_trinity:KIF28_RAT|431;	pfam:KIF28_RAT|431;	1
SteCoe_15467			hypothetical protein	blastp_trinity:NA	pfam:	1
SteCoe_15566			hypothetical protein	blastp_trinity:NA	pfam:	1
SteCoe_15575			hypothetical protein			1
SteCoe_15633			hypothetical protein	blastp_trinity:NA	pfam:	1
SteCoe_15695			hypothetical protein			1
SteCoe_15807			PLK family kinase	blastp_trinity:CCR1_MAIZE|564;	pfam:CCR1_MAIZE|564;	1
SteCoe_15885			PSI domain protein	blastp_trinity:NA	pfam:	1
SteCoe_15919			PhoLip_ATPase_N domain protein	blastp_trinity:ATP9B_DANRE|874;	pfam:ATP9B_DANRE|874;	1
SteCoe_15931			Peptidase_M20 domain protein	blastp_trinity:DUG1_CANAL|70.1;	pfam:DUG1_CANAL|70.1;	1
SteCoe_1601			AAA domain protein	blastp_trinity:Y1297_ARCFU|141;	pfam:Y1297_ARCFU|141;	1
SteCoe_16059			hypothetical protein	blastp_trinity:NA	pfam:	1
SteCoe_16066			hypothetical protein			1
SteCoe_16152			DUSP domain protein	blastp_trinity:UBP1_SCHPO|281;	pfam:UBP1_SCHPO|281;	1
SteCoe_16226			adh_short domain protein	blastp_trinity:HSDL2_XENLA|315;	pfam:HSDL2_XENLA|315;	1
SteCoe_16309			MIF4G domain protein	blastp_trinity:CWC22_CRYNB|560;	pfam:CWC22_CRYNB|560;	1
SteCoe_16323			Ion_trans domain protein	blastp_trinity:KCNH1_RAT|100;	pfam:KCNH1_RAT|100;	1
SteCoe_16380			Enolase_N domain protein	blastp_trinity:ENO_ORYSJ|659;	pfam:ENO_ORYSJ|659;	1
SteCoe_16382			CN_hydrolase domain protein	blastp_trinity:NADE_DICDI|621;	pfam:NADE_DICDI|621;	1
SteCoe_16449			CDPK family kinase	blastp_trinity:CDPK1_PLAFK|404;	pfam:CDPK1_PLAFK|404;	1
SteCoe_16470			kinase domain containing protein	blastp_trinity:HIPPO_DROME|79.7;	pfam:HIPPO_DROME|79.7;	1
SteCoe_16491			Carboxyl_trans domain protein	blastp_trinity:MCCB_DROME|691;	pfam:MCCB_DROME|691;	1
SteCoe_16493			Rubis-subs-bind domain protein	blastp_trinity:RBCMT_ARATH|53.1;	pfam:RBCMT_ARATH|53.1;	1
SteCoe_16630			hypothetical protein	blastp_trinity:ABPF_DICDI|129;	pfam:NA	1
SteCoe_16695			hypothetical protein	blastp_trinity:NA	pfam:	1
SteCoe_16706			Sod_Fe_N domain protein	blastp_trinity:SODM_CHLRE|214;	pfam:SODM_CHLRE|214;	1
SteCoe_16801			hypothetical protein			1
SteCoe_16810			Kinesin domain protein	blastp_trinity:KINH_SYNRA|55.8;	pfam:KINH_SYNRA|55.8;	1
SteCoe_16837			NAD_binding_5 domain protein	blastp_trinity:INO1_HUMAN|633;	pfam:INO1_HUMAN|633;	1
SteCoe_16862			hypothetical protein	blastp_trinity:NA	pfam:	1
SteCoe_16969			Peptidase_M22 domain protein	blastp_trinity:OSGEP_DROME|482;	pfam:OSGEP_DROME|482;	1
SteCoe_17125			RINGv domain protein	blastp_trinity:DOA10_YEAST|53.9;	pfam:DOA10_YEAST|53.9;	1
SteCoe_17195			WWE domain protein	blastp_trinity:XYNB_NEOPA|86.3;	pfam:XYNB_NEOPA|86.3;	1
SteCoe_17221			Actin domain protein	blastp_trinity:ACT1_ACACA|622;	pfam:ACT1_ACACA|622;	1
SteCoe_17229			Na_H_Exchanger domain protein			1
SteCoe_17479			MIP-T3 domain protein	blastp_trinity:MIPT3_RAT|93.2;	pfam:MIPT3_RAT|93.2;	1
SteCoe_17483			UPF1_Zn_bind domain protein	blastp_trinity:RENT1_ARATH|898;	pfam:RENT1_ARATH|898;	1
SteCoe_17527			hypothetical protein			1
SteCoe_17533			FMO-like domain protein	blastp_trinity:FMO3_MACMU|124;	pfam:FMO3_MACMU|124;	1
SteCoe_17571			Thioredoxin domain protein			1
SteCoe_17586			CLAMP domain protein			1
SteCoe_17612			Peptidase_C97 domain protein	blastp_trinity:DESI1_HUMAN|117;	pfam:DESI1_HUMAN|117;	1
SteCoe_17613			Thiolase_N domain protein	blastp_trinity:THIC2_ARATH|366;	pfam:THIC2_ARATH|366;	1
SteCoe_17620			hypothetical protein	blastp_trinity:NA	pfam:	1
SteCoe_1763	high		MMR_HSR1 domain protein	blastp_trinity:Y3913_DICDI|77.0;	pfam:Y3913_DICDI|77.0;	1
SteCoe_17678			GAF domain protein	blastp_trinity:PDE11_DROME|55.8;	pfam:PDE11_DROME|55.8;	1
SteCoe_17707			Dynamin_N domain protein	blastp_trinity:DYNA_DICDI|77.8;	pfam:DYNA_DICDI|77.8;	1
SteCoe_17728			pseudokinase domain containing protein	blastp_trinity:NA	pfam:	1
SteCoe_17785			hypothetical protein	blastp_trinity:NA	pfam:	1
SteCoe_17798			TCR domain protein			1
SteCoe_17799			hypothetical protein			1
SteCoe_17846			hypothetical protein			1
SteCoe_17868			VWA domain protein	blastp_trinity:WAV3_ARATH|85.5;	pfam:WAV3_ARATH|85.5;	1
SteCoe_17907			Sina domain protein			1
SteCoe_18028			MORN domain protein			1
SteCoe_18064			hypothetical protein			1
SteCoe_1822			hypothetical protein			1
SteCoe_18240			hypothetical protein	blastp_trinity:KMT2D_MOUSE|54.3;	pfam:NA	1
SteCoe_18258			hypothetical protein	blastp_trinity:NA	pfam:	1
SteCoe_18280			hypothetical protein	blastp_trinity:NA	pfam:	1
SteCoe_18320			WD40 domain protein	blastp_trinity:ARC1A_MOUSE|171;	pfam:ARC1A_MOUSE|171;	1
SteCoe_18374			Piezo_RRas_bdg domain protein	blastp_trinity:PIEZO_ARATH|142;	pfam:PIEZO_ARATH|142;	1
SteCoe_18453			CD36 domain protein	blastp_trinity:SNMP1_MAMBR|57.0;	pfam:SNMP1_MAMBR|57.0;	1
SteCoe_1846			PAZ domain protein	blastp_trinity:PIWL1_CHICK|375;	pfam:PIWL1_CHICK|375;	1
SteCoe_18478			hypothetical protein	blastp_trinity:NA	pfam:	1
SteCoe_18564			hypothetical protein			1
SteCoe_18574			hypothetical protein	blastp_trinity:NA	pfam:	1
SteCoe_18621	high		WD40 domain protein	blastp_trinity:YY46_NOSS1|109;	pfam:YY46_NOSS1|109;	1
SteCoe_18725			hypothetical protein			1
SteCoe_1877			hypothetical protein			1
SteCoe_18831			Kelch_4 domain protein	blastp_trinity:TENX_HUMAN|75.9;	pfam:TENX_HUMAN|75.9;	1
SteCoe_18880	high		Ldh_1_N domain protein	blastp_trinity:MDHC_MAIZE|378;	pfam:MDHC_MAIZE|378;	1
SteCoe_18893			Nucleoporin_N domain protein			1
SteCoe_18941			HECT domain protein	blastp_trinity:HERC1_HUMAN|201;	pfam:HERC1_HUMAN|201;	1
SteCoe_19050			Dynein_light domain protein			1
SteCoe_19063			hypothetical protein			1
SteCoe_19108			zf-RING_2 domain protein	blastp_trinity:RN183_MOUSE|50.4;	pfam:RN183_MOUSE|50.4;	1
SteCoe_19261			Abhydrolase_2 domain protein	blastp_trinity:APTH1_YEAST|82.8;	pfam:APTH1_YEAST|82.8;	1
SteCoe_19297			NMD3 domain protein	blastp_trinity:NMD3_SCHPO|302;	pfam:NMD3_SCHPO|302;	1
SteCoe_19321			hypothetical protein			1
SteCoe_19374			NEK family kinase			1
SteCoe_19375			hypothetical protein	blastp_trinity:NA	pfam:	1
SteCoe_19386			Adaptin_N domain protein			1
SteCoe_19429			CS domain protein	blastp_trinity:NA	pfam:	1
SteCoe_19712			hypothetical protein	blastp_trinity:NA	pfam:	1
SteCoe_19714			adh_short domain protein	blastp_trinity:DHB4_HUMAN|349;	pfam:DHB4_HUMAN|349;	1
SteCoe_19743			hypothetical protein			1
SteCoe_19830		zf-Sec23_Sec24 domain protein	zf-Sec23_Sec24 domain protein	blastp_trinity:CPAS1_DICDI|84.0;	pfam:CPAS1_DICDI|84.0;	1
SteCoe_19844			ThiF domain protein	blastp_trinity:UBA1_HUMAN|825;	pfam:UBA1_HUMAN|825;	1
SteCoe_19853			Esterase_phd domain protein	blastp_trinity:NA	pfam:	1
SteCoe_1989			His_Phos_1 domain protein	blastp_trinity:PGAM_DICDI|338;	pfam:PGAM_DICDI|338;	1
SteCoe_19989			Aldo_ket_red domain protein	blastp_trinity:KCAB_ARATH|189;	pfam:KCAB_ARATH|189;	1
SteCoe_1999			DnaJ domain protein	blastp_trinity:DNAJ_ROSS1|285;	pfam:DNAJ_ROSS1|285;	1
SteCoe_20153			hypothetical protein			1
SteCoe_20190			C2 domain protein	blastp_trinity:CPNE3_MOUSE|410;	pfam:CPNE3_MOUSE|410;	1
SteCoe_20208			WD40 domain protein	blastp_trinity:YY46_NOSS1|89.4;	pfam:YY46_NOSS1|89.4;	1
SteCoe_2021			UCH domain protein			1
SteCoe_20213			hypothetical protein			1
SteCoe_20224			GST_N domain protein	blastp_trinity:MAAI2_DROME|206;	pfam:MAAI2_DROME|206;	1
SteCoe_20243			CoA_trans domain protein	blastp_trinity:SCOT_DICDI|552;	pfam:SCOT_DICDI|552;	1
SteCoe_20305			VWA domain protein	blastp_trinity:Y103_SYNY3|69.3;	pfam:Y103_SYNY3|69.3;	1
SteCoe_20321			hypothetical protein	blastp_trinity:ODA1_CHLRE|240;	pfam:ODA1_CHLRE|240;	1
SteCoe_20415			hypothetical protein			1
SteCoe_20659			hypothetical protein			1
SteCoe_20668			zf-C2H2_6 domain protein	blastp_trinity:ZN567_BOVIN|47.8;	pfam:ZN567_BOVIN|47.8;	1
SteCoe_20762			ENTH domain protein	blastp_trinity:NA	pfam:	1
SteCoe_20770			SBF2 domain protein			1
SteCoe_20796			PAZ domain protein	blastp_trinity:PIWL1_CHICK|334;	pfam:PIWL1_CHICK|334;	1
SteCoe_20919			GBP domain protein	blastp_trinity:GBP2_HUMAN|68.2;	pfam:GBP2_HUMAN|68.2;	1
SteCoe_20958			CS domain protein	blastp_trinity:P23A_BRANA|54.3;	pfam:P23A_BRANA|54.3;	1
SteCoe_20986			FPL domain protein			1
SteCoe_21			Myb_DNA-binding domain protein			1
SteCoe_21034			Porin_3 domain protein			1
SteCoe_21126			hypothetical protein	blastp_trinity:NA	pfam:	1
SteCoe_21248			Chorein_N domain protein	blastp_trinity:VPS13_DROME|95.1;	pfam:VPS13_DROME|95.1;	1
SteCoe_21289			Cation_ATPase_N domain protein	blastp_trinity:AT2B4_BOVIN|558;	pfam:AT2B4_BOVIN|558;	1
SteCoe_21294			zf-B_box domain protein	blastp_trinity:Y1372_DICDI|52.8;	pfam:Y1372_DICDI|52.8;	1
SteCoe_21319			hypothetical protein			1
SteCoe_21329			DnaJ domain protein	blastp_trinity:DNJB3_MOUSE|148;	pfam:DNJB3_MOUSE|148;	1
SteCoe_2134			MIP domain protein	blastp_trinity:AQP_AEDAE|62.0;	pfam:AQP_AEDAE|62.0;	1
SteCoe_21351			Ank_2 domain protein			1
SteCoe_21381			hypothetical protein			1
SteCoe_21452			Nuc_sug_transp domain protein	blastp_trinity:S35F6_HUMAN|186;	pfam:S35F6_HUMAN|186;	1
SteCoe_21468			PH domain protein	blastp_trinity:NA	pfam:	1
SteCoe_21479			MCM_N domain protein	blastp_trinity:MCM5_ORYSJ|625;	pfam:MCM5_ORYSJ|625;	1
SteCoe_21550			zf-DHHC domain protein	blastp_trinity:ZDH20_ARATH|127;	pfam:ZDH20_ARATH|127;	1
SteCoe_21565			Aminotran_3 domain protein	blastp_trinity:OAT_DROME|523;	pfam:OAT_DROME|523;	1
SteCoe_21608			HELP domain protein	blastp_trinity:EMAL6_HUMAN|317;	pfam:EMAL6_HUMAN|317;	1
SteCoe_21652			hypothetical protein	blastp_trinity:K1324_HUMAN|109;	pfam:K1324_HUMAN|109;	1
SteCoe_21662			Pro_isomerase domain protein	blastp_trinity:CP19A_ARATH|151;	pfam:CP19A_ARATH|151;	1
SteCoe_21693			hypothetical protein			1
SteCoe_21743			PrmA domain protein			1
SteCoe_2175			hypothetical protein			1
SteCoe_21790			CK1 kinase			1
SteCoe_21809			zf-CCCH domain protein	blastp_trinity:C3H11_ORYSJ|192;	pfam:C3H11_ORYSJ|192;	1
SteCoe_21819			Ras domain protein	blastp_trinity:YPTV4_VOLCA|264;	pfam:YPTV4_VOLCA|264;	1
SteCoe_21845			Bromo domain protein	blastp_trinity:GTE4_ARATH|76.6;	pfam:GTE4_ARATH|76.6;	1
SteCoe_21862			Cation_ATPase_N domain protein	blastp_trinity:AT2B3_RAT|625;	pfam:AT2B3_RAT|625;	1
SteCoe_21863			Laminin_G_3 domain protein	blastp_trinity:PCSK6_HUMAN|56.6;	pfam:PCSK6_HUMAN|56.6;	1
SteCoe_21886			hypothetical protein			1
SteCoe_22053			Pyridoxal_deC domain protein			1
SteCoe_22070			Myb_DNA-binding domain protein	blastp_trinity:MYB_MOUSE|125;	pfam:MYB_MOUSE|125;	1
SteCoe_22095			Aminotran_1_2 domain protein	blastp_trinity:AAT2_ARATH|369;	pfam:AAT2_ARATH|369;	1
SteCoe_22192			Actin domain protein	blastp_trinity:ACT_CRYNH|622;	pfam:ACT_CRYNH|622;	1
SteCoe_22200			hypothetical protein			1
SteCoe_22217			hypothetical protein	blastp_trinity:TTN1_CAEEL|55.5;	pfam:NA	1
SteCoe_22285			Glyoxalase domain protein	blastp_trinity:HPPD_RAT|458;	pfam:HPPD_RAT|458;	1
SteCoe_22310			Ras domain protein	blastp_trinity:RABF1_ARATH|164;	pfam:RABF1_ARATH|164;	1
SteCoe_22335			PSI domain protein	blastp_trinity:NA	pfam:	1
SteCoe_22421			FtsJ domain protein	blastp_trinity:CMTR1_RAT|83.2;	pfam:CMTR1_RAT|83.2;	1
SteCoe_22455			adh_short domain protein	blastp_trinity:DHB4_HUMAN|352;	pfam:DHB4_HUMAN|352;	1
SteCoe_22513			Aminotran_1_2 domain protein	blastp_trinity:KAT_DICDI|290;	pfam:KAT_DICDI|290;	1
SteCoe_22520			hypothetical protein			1
SteCoe_22744			hypothetical protein	blastp_trinity:NA	pfam:	1
SteCoe_22779			hypothetical protein			1
SteCoe_22830			Cullin domain protein	blastp_trinity:CUL4A_HUMAN|402;	pfam:CUL4A_HUMAN|402;	1
SteCoe_22840			RasGEF_N domain protein	blastp_trinity:RGRF1_HUMAN|102;	pfam:RGRF1_HUMAN|102;	1
SteCoe_22906			hypothetical protein	blastp_trinity:ZN382_HUMAN|49.7;	pfam:ZN382_HUMAN|49.7;	1
SteCoe_22934			IMPDH domain protein	blastp_trinity:IMDH_DICDI|600;	pfam:IMDH_DICDI|600;	1
SteCoe_23005			Vps26 domain protein	blastp_trinity:VP26B_XENTR|335;	pfam:VP26B_XENTR|335;	1
SteCoe_23064			hypothetical protein			1
SteCoe_23090			hypothetical protein			1
SteCoe_23098			UQ_con domain protein	blastp_trinity:BIRC6_HUMAN|98.2;	pfam:BIRC6_HUMAN|98.2;	1
SteCoe_23191		CDC42	WNK family kinase			1
SteCoe_23199			HD domain protein			1
SteCoe_23291	high		kinase domain containing protein	blastp_trinity:ST32A_MOUSE|68.6;	pfam:ST32A_MOUSE|68.6;	1
SteCoe_23318			hypothetical protein	blastp_trinity:NA	pfam:	1
SteCoe_23359			hypothetical protein			1
SteCoe_2336	high		GDI domain protein	blastp_trinity:GDI1_SCHPO|465;	pfam:GDI1_SCHPO|465;	1
SteCoe_23484			PA domain protein	blastp_trinity:VSR1_PEA|155;	pfam:VSR1_PEA|155;	1
SteCoe_23610			ELFV_dehydrog_N domain protein	blastp_trinity:DHE3_DICDI|421;	pfam:DHE3_DICDI|421;	1
SteCoe_23638			TPR_12 domain protein			1
SteCoe_23648			hypothetical protein	blastp_trinity:NA	pfam:	1
SteCoe_23676			ThiF domain protein	blastp_trinity:UBA1_RABIT|422;	pfam:UBA1_RABIT|422;	1
SteCoe_23699			Actin domain protein	blastp_trinity:ACT1_ACACA|622;	pfam:ACT1_ACACA|622;	1
SteCoe_23770			predicted pseudokinase related to CAMK kinases	blastp_trinity:CDPK1_PLAFK|161;	pfam:CDPK1_PLAFK|161;	1
SteCoe_23809			hypothetical protein	blastp_trinity:NA	pfam:	1
SteCoe_23861			hypothetical protein			1
SteCoe_23888			WD40 domain protein	blastp_trinity:YY46_NOSS1|268;	pfam:YY46_NOSS1|268;	1
SteCoe_23934			Guanylate Cyclase with N-terminal phospholipid ATPase domain	blastp_trinity:ALA12_ARATH|361;	pfam:ALA12_ARATH|361;	1
SteCoe_23955			IBR domain protein	blastp_trinity:Y5521_DICDI|134;	pfam:Y5521_DICDI|134;	1
SteCoe_23961			Flavodoxin_1 domain protein	blastp_trinity:NCPR_DROME|117;	pfam:NCPR_DROME|117;	1
SteCoe_23970			RabGAP-TBC domain protein	blastp_trinity:GRTP1_XENTR|80.9;	pfam:GRTP1_XENTR|80.9;	1
SteCoe_23986			hypothetical protein	blastp_trinity:NA	pfam:	1
SteCoe_23987			hypothetical protein	blastp_trinity:NA	pfam:	1
SteCoe_24092			hypothetical protein	blastp_trinity:NA	pfam:	1
SteCoe_24108			hypothetical protein			1
SteCoe_24142			Aminotran_1_2 domain protein			1
SteCoe_24189			Telomere_Sde2 domain protein	blastp_trinity:SDE2_XENLA|73.2;	pfam:SDE2_XENLA|73.2;	1
SteCoe_24279			pseudokinase domain containing protein	blastp_trinity:DST2_DICDI|92.8;	pfam:DST2_DICDI|92.8;	1
SteCoe_24287			WD40 domain protein	blastp_trinity:HETE1_PODAS|65.9;	pfam:HETE1_PODAS|65.9;	1
SteCoe_24366			hypothetical protein			1
SteCoe_24455			AKAP7_NLS domain protein	blastp_trinity:NA	pfam:	1
SteCoe_24567			hypothetical protein			1
SteCoe_24598			DHC_N1 domain protein			1
SteCoe_24719			hypothetical protein			1
SteCoe_24758			PAZ domain protein	blastp_trinity:PIWL1_CHICK|373;	pfam:PIWL1_CHICK|373;	1
SteCoe_24800			Biopterin_H domain protein	blastp_trinity:PH4H_DICDI|362;	pfam:PH4H_DICDI|362;	1
SteCoe_24823			BTB domain protein	blastp_trinity:Y3623_ARATH|66.6;	pfam:Y3623_ARATH|66.6;	1
SteCoe_24907			PB1 domain protein	blastp_trinity:NBR1_ARATH|97.8;	pfam:NBR1_ARATH|97.8;	1
SteCoe_24971			hypothetical protein	blastp_trinity:NA	pfam:	1
SteCoe_2520			hypothetical protein	blastp_trinity:NA	pfam:	1
SteCoe_25201	high		AMP-binding domain protein	blastp_trinity:LACS7_ARATH|476;	pfam:LACS7_ARATH|476;	1
SteCoe_25257			hypothetical protein	blastp_trinity:NA	pfam:	1
SteCoe_25429			zf-C3HC4_3 domain protein	blastp_trinity:RC3H2_MOUSE|58.2;	pfam:RC3H2_MOUSE|58.2;	1
SteCoe_25516			hypothetical protein			1
SteCoe_25627			hypothetical protein	blastp_trinity:PAP2_YEAST|70.9;	pfam:PAP2_YEAST|70.9;	1
SteCoe_25682			hypothetical protein	blastp_trinity:NA	pfam:	1
SteCoe_25726			hypothetical protein	blastp_trinity:NA	pfam:	1
SteCoe_2582	high		hypothetical protein	blastp_trinity:FRAS1_MOUSE|63.5;	pfam:NA	1
SteCoe_25831			Septin domain protein	blastp_trinity:SEPT1_MOUSE|137;	pfam:SEPT1_MOUSE|137;	1
SteCoe_25861			hypothetical protein	blastp_trinity:NA	pfam:	1
SteCoe_25898			PI3 kinase	blastp_trinity:PI3K2_DICDI|420;	pfam:PI3K2_DICDI|420;	1
SteCoe_25934			Cation_ATPase_N domain protein	blastp_trinity:AT2B3_HUMAN|712;	pfam:AT2B3_HUMAN|712;	1
SteCoe_25973			hypothetical protein			1
SteCoe_25998			Pro_dh domain protein	blastp_trinity:PROD2_ARATH|168;	pfam:PROD2_ARATH|168;	1
SteCoe_2601			Clathrin domain protein	blastp_trinity:VPS11_HUMAN|398;	pfam:VPS11_HUMAN|398;	1
SteCoe_26044			DnaJ domain protein	blastp_trinity:DNJH_CUCSA|284;	pfam:DNJH_CUCSA|284;	1
SteCoe_26061			hypothetical protein			1
SteCoe_26084			Peptidase_M24 domain protein	blastp_trinity:PEPD_MOUSE|347;	pfam:PEPD_MOUSE|347;	1
SteCoe_26117			Memo domain protein	blastp_trinity:MEMO1_XENLA|285;	pfam:MEMO1_XENLA|285;	1
SteCoe_26134			Ion_trans_2 domain protein	blastp_trinity:KCNN2_RAT|64.7;	pfam:KCNN2_RAT|64.7;	1
SteCoe_26228	high		hypothetical protein	blastp_trinity:NA	pfam:	1
SteCoe_26251			hypothetical protein			1
SteCoe_26263			kinase domain containing protein	blastp_trinity:NEKL3_CAEEL|79.7;	pfam:NEKL3_CAEEL|79.7;	1
SteCoe_26277			hypothetical protein			1
SteCoe_26285			Methyltransf_12 domain protein	blastp_trinity:METL6_HUMAN|181;	pfam:METL6_HUMAN|181;	1
SteCoe_2629			DNAPK			1
SteCoe_26303			Ank_4 domain protein			1
SteCoe_26311			hypothetical protein			1
SteCoe_26373			hypothetical protein			1
SteCoe_26384			hypothetical protein	blastp_trinity:NA	pfam:	1
SteCoe_26430			RRM_1 domain protein	blastp_trinity:PABP_SCHPO|221;	pfam:PABP_SCHPO|221;	1
SteCoe_26449			hypothetical protein			1
SteCoe_26472			Nudc_N domain protein	blastp_trinity:NUDC_CHICK|208;	pfam:NUDC_CHICK|208;	1
SteCoe_26501			Peptidase_C12 domain protein	blastp_trinity:UCHL_APLCA|73.2;	pfam:UCHL_APLCA|73.2;	1
SteCoe_2660			MORN domain protein	blastp_trinity:PI5K9_ARATH|53.5;	pfam:PI5K9_ARATH|53.5;	1
SteCoe_26744			CDPK family kinase	blastp_trinity:MYLKA_DICDI|182;	pfam:MYLKA_DICDI|182;	1
SteCoe_26793			AAA_28 domain protein			1
SteCoe_26950			hypothetical protein			1
SteCoe_26974			Kinesin domain protein			1
SteCoe_27015			hypothetical protein			1
SteCoe_27026			LRR_6 domain protein	blastp_trinity:NLRC5_MOUSE|59.7;	pfam:NLRC5_MOUSE|59.7;	1
SteCoe_27049			hypothetical protein	blastp_trinity:NA	pfam:	1
SteCoe_27094			CLASP_N domain protein	blastp_trinity:TGRM1_MOUSE|125;	pfam:TGRM1_MOUSE|125;	1
SteCoe_27133			Dopey_N domain protein	blastp_trinity:DOP1_DROPS|94.7;	pfam:DOP1_DROPS|94.7;	1
SteCoe_27150			ABC_tran domain protein	blastp_trinity:WHITE_ANOGA|259;	pfam:WHITE_ANOGA|259;	1
SteCoe_27204	high		IQ domain protein	blastp_trinity:PI5K2_ARATH|88.6;	pfam:PI5K2_ARATH|88.6;	1
SteCoe_27277			MORN domain protein	blastp_trinity:PI5K9_ARATH|111;	pfam:PI5K9_ARATH|111;	1
SteCoe_27345			zf-DHHC domain protein	blastp_trinity:ZDH18_ARATH|120;	pfam:ZDH18_ARATH|120;	1
SteCoe_27416			Rhodanese domain protein	blastp_trinity:STR2_ARATH|201;	pfam:STR2_ARATH|201;	1
SteCoe_27469			Methyltransf_23 domain protein	blastp_trinity:PEAM3_ARATH|55.5;	pfam:PEAM3_ARATH|55.5;	1
SteCoe_27496			Ubiquitin_2 domain protein	blastp_trinity:TBCB_ARATH|194;	pfam:TBCB_ARATH|194;	1
SteCoe_27548			S1-P1_nuclease domain protein	blastp_trinity:ENDO2_ARATH|82.8;	pfam:ENDO2_ARATH|82.8;	1
SteCoe_27602			IBR domain protein	blastp_trinity:Y5521_DICDI|104;	pfam:Y5521_DICDI|104;	1
SteCoe_27604			UCH domain protein	blastp_trinity:UBP25_MOUSE|117;	pfam:UBP25_MOUSE|117;	1
SteCoe_27631			PCI domain protein	blastp_trinity:CSN3_DICDI|96.7;	pfam:CSN3_DICDI|96.7;	1
SteCoe_2766			hypothetical protein			1
SteCoe_27680			Aldedh domain protein	blastp_trinity:ALDH2_HUMAN|600;	pfam:ALDH2_HUMAN|600;	1
SteCoe_27687			hypothetical protein	blastp_trinity:NA	pfam:	1
SteCoe_27722			hypothetical protein			1
SteCoe_27734			Sod_Fe_N domain protein	blastp_trinity:SODM_STACA|155;	pfam:SODM_STACA|155;	1
SteCoe_27761			CS domain protein	blastp_trinity:SGT1_BOVIN|146;	pfam:SGT1_BOVIN|146;	1
SteCoe_27816			SHIPPO-rpt domain protein			1
SteCoe_27861			Laminin_G_3 domain protein	blastp_trinity:RSPO1_DANRE|56.6;	pfam:RSPO1_DANRE|56.6;	1
SteCoe_28050			hypothetical protein			1
SteCoe_28090			hypothetical protein			1
SteCoe_28121			hypothetical protein			1
SteCoe_28126			PDDEXK_9 domain protein	blastp_trinity:NA	pfam:	1
SteCoe_28142			hypothetical protein			1
SteCoe_28246			hypothetical protein	blastp_trinity:NA	pfam:	1
SteCoe_28255			hypothetical protein			1
SteCoe_2831			hypothetical protein			1
SteCoe_28317			hypothetical protein	blastp_trinity:CX056_HUMAN|58.9;	pfam:CX056_HUMAN|58.9;	1
SteCoe_28335	high		Dynamin_N domain protein	blastp_trinity:SDL5A_SOYBN|288;	pfam:SDL5A_SOYBN|288;	1
SteCoe_28338			EF-hand_7 domain protein	blastp_trinity:CAN5_MOUSE|203;	pfam:CAN5_MOUSE|203;	1
SteCoe_28353			PDEase_I domain protein			1
SteCoe_28365			CTP_transf_like domain protein	blastp_trinity:PCY2_DICDI|111;	pfam:PCY2_DICDI|111;	1
SteCoe_28400	high		Vault domain protein	blastp_trinity:MVPA_DICDI|829;	pfam:MVPA_DICDI|829;	1
SteCoe_2843			adh_short domain protein	blastp_trinity:DHB12_XENTR|152;	pfam:DHB12_XENTR|152;	1
SteCoe_28509			Actin domain protein			1
SteCoe_28543			hypothetical protein	blastp_trinity:RLGPB_MOUSE|99.0;	pfam:NA	1
SteCoe_28784			zf-RING_2 domain protein	blastp_trinity:TRIM3_HUMAN|72.8;	pfam:TRIM3_HUMAN|72.8;	1
SteCoe_28841			HgmA domain protein	blastp_trinity:HGD_DICDI|468;	pfam:HGD_DICDI|468;	1
SteCoe_2886			kinase domain containing protein	blastp_trinity:MELK_MOUSE|71.6;	pfam:MELK_MOUSE|71.6;	1
SteCoe_28958			pseudokinase domain containing protein	blastp_trinity:DST2_DICDI|86.3;	pfam:DST2_DICDI|86.3;	1
SteCoe_28970			Kelch_4 domain protein	blastp_trinity:AFK_PHYPO|56.6;	pfam:AFK_PHYPO|56.6;	1
SteCoe_28973			VIT domain protein	blastp_trinity:Y2016_DICDI|199;	pfam:Y2016_DICDI|199;	1
SteCoe_28975			IBR domain protein			1
SteCoe_28981			Kinesin domain protein	blastp_trinity:KIF3_DICDI|292;	pfam:KIF3_DICDI|292;	1
SteCoe_28988			ULK family kinase	blastp_trinity:ATG1A_ARATH|170;	pfam:ATG1A_ARATH|170;	1
SteCoe_29026			Acyl-CoA_dh_N domain protein	blastp_trinity:GCDH_DICDI|491;	pfam:GCDH_DICDI|491;	1
SteCoe_29037			RSN1_TM domain protein	blastp_trinity:CSCL1_MOUSE|116;	pfam:CSCL1_MOUSE|116;	1
SteCoe_29038			Adenylsucc_synt domain protein	blastp_trinity:PURA_PARTE|514;	pfam:PURA_PARTE|514;	1
SteCoe_29056	high		zf-DHHC domain protein	blastp_trinity:ZDH20_ARATH|121;	pfam:ZDH20_ARATH|121;	1
SteCoe_29089			hypothetical protein			1
SteCoe_291			hypothetical protein			1
SteCoe_29106			hypothetical protein	blastp_trinity:NA	pfam:	1
SteCoe_29153			hypothetical protein			1
SteCoe_29243			Pep3_Vps18 domain protein	blastp_trinity:VPS18_DANRE|365;	pfam:VPS18_DANRE|365;	1
SteCoe_29257			hypothetical protein	blastp_trinity:NA	pfam:	1
SteCoe_29405			RCK family kinase	blastp_trinity:MAK_HUMAN|397;	pfam:MAK_HUMAN|397;	1
SteCoe_29484			PH_BEACH domain protein	blastp_trinity:NBEL2_DANRE|264;	pfam:NBEL2_DANRE|264;	1
SteCoe_29497			hypothetical protein	blastp_trinity:NA	pfam:	1
SteCoe_29669			hypothetical protein	blastp_trinity:NA	pfam:	1
SteCoe_297			WWE domain protein	blastp_trinity:NA	pfam:	1
SteCoe_29702			hypothetical protein			1
SteCoe_29721			EF-hand_7 domain protein	blastp_trinity:CATR_DUNSA|54.7;	pfam:CATR_DUNSA|54.7;	1
SteCoe_29723			hypothetical protein	blastp_trinity:NA	pfam:	1
SteCoe_29776			AMP-binding domain protein	blastp_trinity:ACBG2_CHICK|537;	pfam:ACBG2_CHICK|537;	1
SteCoe_29794			MMR_HSR1 domain protein	blastp_trinity:DRG2_ARATH|490;	pfam:DRG2_ARATH|490;	1
SteCoe_29841			PP2C domain protein	blastp_trinity:P2C59_ARATH|131;	pfam:P2C59_ARATH|131;	1
SteCoe_2996			ABC_membrane domain protein	blastp_trinity:ABCB5_HUMAN|111;	pfam:ABCB5_HUMAN|111;	1
SteCoe_29981			VWA domain protein	blastp_trinity:WAVH2_ARATH|73.2;	pfam:WAVH2_ARATH|73.2;	1
SteCoe_29997			Chorein_N domain protein	blastp_trinity:VP13E_DICDI|60.1;	pfam:VP13E_DICDI|60.1;	1
SteCoe_30032			Strumpellin domain protein	blastp_trinity:WASC5_XENTR|910;	pfam:WASC5_XENTR|910;	1
SteCoe_30220			hypothetical protein	blastp_trinity:NA	pfam:	1
SteCoe_30247			Drf_GBD domain protein	blastp_trinity:FMN2_MOUSE|106;	pfam:FMN2_MOUSE|106;	1
SteCoe_3054			CDPK family kinase	blastp_trinity:CDPK1_PLAFK|415;	pfam:CDPK1_PLAFK|415;	1
SteCoe_3059			ABC_tran domain protein	blastp_trinity:WHITE_DROME|303;	pfam:WHITE_DROME|303;	1
SteCoe_30610			COMM_ domain protein	blastp_trinity:COMD9_BOVIN|76.3;	pfam:COMD9_BOVIN|76.3;	1
SteCoe_30655			DUSP domain protein	blastp_trinity:UBP4_MOUSE|142;	pfam:UBP4_MOUSE|142;	1
SteCoe_30659			hypothetical protein	blastp_trinity:NA	pfam:	1
SteCoe_30735			Acyl-CoA_dh_N domain protein	blastp_trinity:ACAD8_HUMAN|390;	pfam:ACAD8_HUMAN|390;	1
SteCoe_30804			pseudokinase domain containing protein	blastp_trinity:MPH1L_SCHPO|66.2;	pfam:MPH1L_SCHPO|66.2;	1
SteCoe_30817			hypothetical protein			1
SteCoe_30895			hypothetical protein			1
SteCoe_309			MORN domain protein	blastp_trinity:PI5K6_ARATH|75.5;	pfam:PI5K6_ARATH|75.5;	1
SteCoe_3091			hypothetical protein	blastp_trinity:NA	pfam:	1
SteCoe_30910			hypothetical protein			1
SteCoe_30969			SPRY domain protein	blastp_trinity:HERC2_MOUSE|87.4;	pfam:HERC2_MOUSE|87.4;	1
SteCoe_31143			RabGAP-TBC domain protein	blastp_trinity:EVI5_DROME|115;	pfam:EVI5_DROME|115;	1
SteCoe_31149			WD40 domain protein	blastp_trinity:ARC1A_MOUSE|168;	pfam:ARC1A_MOUSE|168;	1
SteCoe_31194			PH domain protein	blastp_trinity:NA	pfam:	1
SteCoe_31203			Ribonuclease_3 domain protein			1
SteCoe_31231			hypothetical protein	blastp_trinity:NA	pfam:	1
SteCoe_31307			Spc97_Spc98 domain protein			1
SteCoe_31338			TPP_enzyme_N domain protein	blastp_trinity:PPD_STRHY|202;	pfam:PPD_STRHY|202;	1
SteCoe_31367			hypothetical protein			1
SteCoe_31402			Biopterin_H domain protein	blastp_trinity:PH4H_DICDI|360;	pfam:PH4H_DICDI|360;	1
SteCoe_31428			DUF4201 domain protein			1
SteCoe_31455			PX domain protein	blastp_trinity:NA	pfam:	1
SteCoe_31533			hypothetical protein	blastp_trinity:SHIP2_MOUSE|91.7;	pfam:NA	1
SteCoe_31580	high		Aminotran_1_2 domain protein	blastp_trinity:AAT2_ARATH|454;	pfam:AAT2_ARATH|454;	1
SteCoe_31581			CBM_48 domain protein	blastp_trinity:GLGB_RHIID|772;	pfam:GLGB_RHIID|772;	1
SteCoe_31582			kinase domain containing protein	blastp_trinity:CIPKB_ARATH|81.3;	pfam:CIPKB_ARATH|81.3;	1
SteCoe_31759			ArfGap domain protein	blastp_trinity:AGD7_ARATH|121;	pfam:AGD7_ARATH|121;	1
SteCoe_31864			RSN1_TM domain protein			1
SteCoe_319			Peptidase_C2 domain protein	blastp_trinity:DEK1_ORYSJ|221;	pfam:DEK1_ORYSJ|221;	1
SteCoe_32075			Metallophos domain protein	blastp_trinity:PP2BA_DICDI|454;	pfam:PP2BA_DICDI|454;	1
SteCoe_32135			WD40 domain protein			1
SteCoe_32143			hypothetical protein	blastp_trinity:NA	pfam:	1
SteCoe_32248			Kelch_4 domain protein	blastp_trinity:NA	pfam:	1
SteCoe_3226			Glyco_hydro_47 domain protein			1
SteCoe_32342			hypothetical protein			1
SteCoe_32376			SNARE_assoc domain protein	blastp_trinity:Y305_SYNY3|72.0;	pfam:Y305_SYNY3|72.0;	1
SteCoe_32639			hypothetical protein			1
SteCoe_32643			hypothetical protein			1
SteCoe_3265			WWE domain protein	blastp_trinity:NA	pfam:	1
SteCoe_32667			hypothetical protein			1
SteCoe_32782			hypothetical protein	blastp_trinity:GRP3_DAUCA|58.2;	pfam:GRP3_DAUCA|58.2;	1
SteCoe_32804			hypothetical protein	blastp_trinity:GLN13_ARATH|434;	pfam:GLN13_ARATH|434;	1
SteCoe_3281			H_PPase domain protein	blastp_trinity:AVP_HORVU|736;	pfam:AVP_HORVU|736;	1
SteCoe_32834			hypothetical protein	blastp_trinity:LBP_MOUSE|61.6;	pfam:LBP_MOUSE|61.6;	1
SteCoe_33041			hypothetical protein			1
SteCoe_33045			hypothetical protein			1
SteCoe_33103			hypothetical protein			1
SteCoe_33242			hypothetical protein	blastp_trinity:UBPE_DROME|356;	pfam:UBPE_DROME|356;	1
SteCoe_33275			hypothetical protein	blastp_trinity:TNKS1_CAEEL|57.8;	pfam:TNKS1_CAEEL|57.8;	1
SteCoe_33425			hypothetical protein	blastp_trinity:U2AFB_ORYSJ|231;	pfam:U2AFB_ORYSJ|231;	1
SteCoe_33427			hypothetical protein	blastp_trinity:ODF3B_DANRE|55.5;	pfam:ODF3B_DANRE|55.5;	1
SteCoe_33644			hypothetical protein			1
SteCoe_33646			hypothetical protein			1
SteCoe_33656			hypothetical protein	blastp_trinity:TE80_TETTH|96.3;	pfam:TE80_TETTH|96.3;	1
SteCoe_3369			pseudokinase domain containing protein	blastp_trinity:CDPKF_ORYSJ|58.2;	pfam:CDPKF_ORYSJ|58.2;	1
SteCoe_33692			hypothetical protein	blastp_trinity:UVR8_ARATH|73.6;	pfam:UVR8_ARATH|73.6;	1
SteCoe_33718			hypothetical protein			1
SteCoe_33728			hypothetical protein	blastp_trinity:PP2C3_PARTE|307;	pfam:PP2C3_PARTE|307;	1
SteCoe_33801			hypothetical protein	blastp_trinity:HUTH_MOUSE|498;	pfam:HUTH_MOUSE|498;	1
SteCoe_33946			hypothetical protein	blastp_trinity:NA	pfam:	1
SteCoe_33976			hypothetical protein			1
SteCoe_34000			hypothetical protein			1
SteCoe_34092			hypothetical protein	blastp_trinity:DYHC_PARTE|4481;	pfam:DYHC_PARTE|4481;	1
SteCoe_34116			hypothetical protein	blastp_trinity:SF3B1_XENLA|1317;	pfam:SF3B1_XENLA|1317;	1
SteCoe_34228			hypothetical protein	blastp_trinity:NA	pfam:	1
SteCoe_34275			hypothetical protein	blastp_trinity:ALAXL_PYRHO|88.2;	pfam:ALAXL_PYRHO|88.2;	1
SteCoe_34328			hypothetical protein	blastp_trinity:ADCA_DICDI|57.4;	pfam:ADCA_DICDI|57.4;	1
SteCoe_34335			hypothetical protein	blastp_trinity:GDE_HORSE|335;	pfam:GDE_HORSE|335;	1
SteCoe_34401			hypothetical protein	blastp_trinity:UBP11_ARATH|160;	pfam:UBP11_ARATH|160;	1
SteCoe_34408			hypothetical protein	blastp_trinity:LIPG_BOVIN|241;	pfam:LIPG_BOVIN|241;	1
SteCoe_34433			hypothetical protein	blastp_trinity:Y1931_DICDI|62.8;	pfam:Y1931_DICDI|62.8;	1
SteCoe_34449			hypothetical protein			1
SteCoe_34508			hypothetical protein	blastp_trinity:NA	pfam:	1
SteCoe_34677			hypothetical protein	blastp_trinity:NA	pfam:	1
SteCoe_3469			hypothetical protein			1
SteCoe_34713			hypothetical protein			1
SteCoe_34741			kinase domain containing protein	blastp_trinity:NEK6_MOUSE|109;	pfam:NEK6_MOUSE|109;	1
SteCoe_34845			hypothetical protein			1
SteCoe_34847			hypothetical protein	blastp_trinity:NADE_DICDI|465;	pfam:NADE_DICDI|465;	1
SteCoe_34934			hypothetical protein	blastp_trinity:PHS1_DICDI|896;	pfam:PHS1_DICDI|896;	1
SteCoe_35122			hypothetical protein			1
SteCoe_35254			hypothetical protein	blastp_trinity:CCA1_ARATH|67.8;	pfam:CCA1_ARATH|67.8;	1
SteCoe_35260			hypothetical protein	blastp_trinity:NA	pfam:	1
SteCoe_35379			hypothetical protein	blastp_trinity:NA	pfam:	1
SteCoe_35451			hypothetical protein			1
SteCoe_35497			hypothetical protein			1
SteCoe_35504			hypothetical protein			1
SteCoe_35515			hypothetical protein	blastp_trinity:DDX3X_HUMAN|412;	pfam:DDX3X_HUMAN|412;	1
SteCoe_35552			hypothetical protein			1
SteCoe_35561			hypothetical protein			1
SteCoe_35607			hypothetical protein	blastp_trinity:DNJC7_DICDI|76.6;	pfam:DNJC7_DICDI|76.6;	1
SteCoe_35632			hypothetical protein			1
SteCoe_35641			hypothetical protein	blastp_trinity:AB1A_ARATH|823;	pfam:AB1A_ARATH|823;	1
SteCoe_35770			hypothetical protein	blastp_trinity:UBP4_RAT|320;	pfam:UBP4_RAT|320;	1
SteCoe_35805			hypothetical protein			1
SteCoe_35833			hypothetical protein	blastp_trinity:HDA5_ARATH|230;	pfam:HDA5_ARATH|230;	1
SteCoe_35886			hypothetical protein	blastp_trinity:ARFG3_RAT|104;	pfam:ARFG3_RAT|104;	1
SteCoe_35947			hypothetical protein	blastp_trinity:NA	pfam:	1
SteCoe_35953			hypothetical protein	blastp_trinity:SCOT_DICDI|494;	pfam:SCOT_DICDI|494;	1
SteCoe_3600			Ras domain protein	blastp_trinity:RAH1E_ARATH|257;	pfam:RAH1E_ARATH|257;	1
SteCoe_36040			hypothetical protein			1
SteCoe_36074			hypothetical protein	blastp_trinity:RNF14_HUMAN|67.0;	pfam:RNF14_HUMAN|67.0;	1
SteCoe_36094			hypothetical protein	blastp_trinity:NA	pfam:	1
SteCoe_36126			Akt family kinase	blastp_trinity:SGK1_FUNHE|305;	pfam:SGK1_FUNHE|305;	1
SteCoe_36138			hypothetical protein	blastp_trinity:P2C35_ARATH|125;	pfam:P2C35_ARATH|125;	1
SteCoe_36246			hypothetical protein	blastp_trinity:NA	pfam:	1
SteCoe_36247			hypothetical protein			1
SteCoe_3627			ECH_1 domain protein	blastp_trinity:AUHM_DICDI|247;	pfam:AUHM_DICDI|247;	1
SteCoe_3636			Nucleoporin_FG domain protein	blastp_trinity:NUP98_DICDI|63.5;	pfam:NUP98_DICDI|63.5;	1
SteCoe_36369			pseudokinase domain containing protein	blastp_trinity:MKK1_YEAST|68.9;	pfam:MKK1_YEAST|68.9;	1
SteCoe_364			Clathrin domain protein	blastp_trinity:TGFA1_BOVIN|186;	pfam:TGFA1_BOVIN|186;	1
SteCoe_36448			Akt family kinase	blastp_trinity:PK2_DICDI|337;	pfam:PK2_DICDI|337;	1
SteCoe_3649			hypothetical protein	blastp_trinity:NA	pfam:	1
SteCoe_36774			hypothetical protein	blastp_trinity:NA	pfam:	1
SteCoe_36781			EF-hand_7 domain protein	blastp_trinity:CML4_ORYSJ|53.9;	pfam:CML4_ORYSJ|53.9;	1
SteCoe_36797			NIF domain protein			1
SteCoe_36926			hypothetical protein	blastp_trinity:NA	pfam:	1
SteCoe_36964			EF-hand_5 domain protein			1
SteCoe_37016	high		hypothetical protein	blastp_trinity:NA	pfam:	1
SteCoe_37034			hypothetical protein	blastp_trinity:IPO5_MOUSE|221;	pfam:IPO5_MOUSE|221;	1
SteCoe_37075			hypothetical protein	blastp_trinity:ABPF_DICDI|73.9;	pfam:NA	1
SteCoe_37306			hypothetical protein	blastp_trinity:NA	pfam:	1
SteCoe_37388			hypothetical protein			1
SteCoe_37398			hypothetical protein	blastp_trinity:TI214_CUSRE|53.5;	pfam:TI214_CUSRE|53.5;	1
SteCoe_37460			hypothetical protein			1
SteCoe_37477			C2 domain protein	blastp_trinity:CPNE8_MOUSE|355;	pfam:CPNE8_MOUSE|355;	1
SteCoe_37478			Methyltransf_31 domain protein	blastp_trinity:Y912_HAEIN|50.1;	pfam:Y912_HAEIN|50.1;	1
SteCoe_37489			adh_short domain protein	blastp_trinity:DRS7B_RAT|166;	pfam:DRS7B_RAT|166;	1
SteCoe_3755			hypothetical protein			1
SteCoe_37558			Myb_DNA-binding domain protein	blastp_trinity:MY115_ARATH|106;	pfam:MY115_ARATH|106;	1
SteCoe_37618			Cyclin	blastp_trinity:CCYL1_DANRE|130;	pfam:CCYL1_DANRE|130;	1
SteCoe_37669			PP2C domain protein	blastp_trinity:PP2C3_PARTE|313;	pfam:PP2C3_PARTE|313;	1
SteCoe_37804			PB1 domain protein	blastp_trinity:REF2P_DROME|60.5;	pfam:REF2P_DROME|60.5;	1
SteCoe_37871			hypothetical protein	blastp_trinity:NA	pfam:	1
SteCoe_37931			hypothetical protein	blastp_trinity:NA	pfam:	1
SteCoe_38048			hypothetical protein			1
SteCoe_38100			Ras domain protein	blastp_trinity:YPTC4_CHLRE|262;	pfam:YPTC4_CHLRE|262;	1
SteCoe_38290			Ribul_P_3_epim domain protein	blastp_trinity:RPE1_ORYSJ|232;	pfam:RPE1_ORYSJ|232;	1
SteCoe_38339			hypothetical protein			1
SteCoe_38409			Arf domain protein	blastp_trinity:ARFK_DICDI|130;	pfam:ARFK_DICDI|130;	1
SteCoe_38521			hypothetical protein			1
SteCoe_38535	high		Amidase domain protein	blastp_trinity:FAAH1_MOUSE|221;	pfam:FAAH1_MOUSE|221;	1
SteCoe_386			NAD_binding_2 domain protein	blastp_trinity:3HID1_ARATH|320;	pfam:3HID1_ARATH|320;	1
SteCoe_3946			hypothetical protein			1
SteCoe_3983			UPF1_Zn_bind domain protein	blastp_trinity:RENT1_ARATH|892;	pfam:RENT1_ARATH|892;	1
SteCoe_4022			zf-Sec23_Sec24 domain protein	blastp_trinity:CPAS1_DICDI|225;	pfam:CPAS1_DICDI|225;	1
SteCoe_4070			CDPK family kinase	blastp_trinity:CDPK4_PLAYO|292;	pfam:CDPK4_PLAYO|292;	1
SteCoe_4080			IQ domain protein			1
SteCoe_4154			hypothetical protein	blastp_trinity:NA	pfam:	1
SteCoe_4177			ABC_membrane domain protein	blastp_trinity:MRP4_HUMAN|681;	pfam:MRP4_HUMAN|681;	1
SteCoe_419			PNTB domain protein	blastp_trinity:PNTB_SHIFL|468;	pfam:PNTB_SHIFL|468;	1
SteCoe_4214			Arginase domain protein	blastp_trinity:ARGI_LITCT|168;	pfam:ARGI_LITCT|168;	1
SteCoe_4276			TPR_1 domain protein			1
SteCoe_4389			hypothetical protein	blastp_trinity:NA	pfam:	1
SteCoe_44			hypothetical protein			1
SteCoe_4429			ULK family kinase	blastp_trinity:ULK3_XENLA|170;	pfam:ULK3_XENLA|170;	1
SteCoe_4431			Ras domain protein	blastp_trinity:RABF1_ARATH|169;	pfam:RABF1_ARATH|169;	1
SteCoe_4453			Myb_DNA-bind_6 domain protein	blastp_trinity:MYBB_CHICK|57.4;	pfam:MYBB_CHICK|57.4;	1
SteCoe_4496			Enolase_N domain protein	blastp_trinity:ENO_SOLLC|645;	pfam:ENO_SOLLC|645;	1
SteCoe_4519			LANC_like domain protein	blastp_trinity:LANC2_HUMAN|188;	pfam:LANC2_HUMAN|188;	1
SteCoe_455			WWE domain protein	blastp_trinity:NA	pfam:	1
SteCoe_4661			Sugar_tr domain protein	blastp_trinity:IOLT_BACSU|165;	pfam:IOLT_BACSU|165;	1
SteCoe_4672			cNMP_binding domain protein	blastp_trinity:KAPR_BLAEM|245;	pfam:KAPR_BLAEM|245;	1
SteCoe_4827			C2 domain protein	blastp_trinity:CPNE8_HUMAN|424;	pfam:CPNE8_HUMAN|424;	1
SteCoe_4842			Pyr_redox_2 domain protein	blastp_trinity:TRXR1_BOVIN|530;	pfam:TRXR1_BOVIN|530;	1
SteCoe_4878			WD40 domain protein	blastp_trinity:YY46_NOSS1|106;	pfam:YY46_NOSS1|106;	1
SteCoe_494			RRM_1 domain protein	blastp_trinity:RNP1_ARATH|60.8;	pfam:RNP1_ARATH|60.8;	1
SteCoe_5002			UCH domain protein	blastp_trinity:UBP26_ORYSI|104;	pfam:UBP26_ORYSI|104;	1
SteCoe_5143			hypothetical protein	blastp_trinity:NA	pfam:	1
SteCoe_5235			hypothetical protein			1
SteCoe_5258			Kinesin domain protein	blastp_trinity:KIF4_DICDI|250;	pfam:KIF4_DICDI|250;	1
SteCoe_5272			MORN domain protein	blastp_trinity:PI5K2_ARATH|89.4;	pfam:PI5K2_ARATH|89.4;	1
SteCoe_5279			zf-B_box domain protein	blastp_trinity:NA	pfam:	1
SteCoe_5281			RCC1 domain protein			1
SteCoe_5343			SAM_2 domain protein			1
SteCoe_5345			C2 domain protein	blastp_trinity:CPNE7_RAT|374;	pfam:CPNE7_RAT|374;	1
SteCoe_5362			PB1 domain protein	blastp_trinity:BAG_STRAG|73.2;	pfam:BAG_STRAG|73.2;	1
SteCoe_5412			PB1 domain protein	blastp_trinity:NA	pfam:	1
SteCoe_5600			hypothetical protein	blastp_trinity:NA	pfam:	1
SteCoe_5604			hypothetical protein			1
SteCoe_5663			CDPK family kinase	blastp_trinity:CDPK1_PLAYO|175;	pfam:CDPK1_PLAYO|175;	1
SteCoe_5672			Peptidase_M20 domain protein	blastp_trinity:CNDP2_BOVIN|81.6;	pfam:CNDP2_BOVIN|81.6;	1
SteCoe_5695			Pyr_redox_2 domain protein	blastp_trinity:DLDH_SCHPO|514;	pfam:DLDH_SCHPO|514;	1
SteCoe_5747			Peptidase_C2 domain protein	blastp_trinity:DEK1_ARATH|159;	pfam:DEK1_ARATH|159;	1
SteCoe_5770	high		FKBP_C domain protein	blastp_trinity:PPID_BOVIN|70.9;	pfam:PPID_BOVIN|70.9;	1
SteCoe_5774			Nudc_N domain protein	blastp_trinity:NUDC_CHICK|200;	pfam:NUDC_CHICK|200;	1
SteCoe_5895	high		DIOX_N domain protein	blastp_trinity:NA	pfam:	1
SteCoe_597			hypothetical protein			1
SteCoe_600			WD40 domain protein	blastp_trinity:YY46_NOSS1|244;	pfam:YY46_NOSS1|244;	1
SteCoe_6073	high		Mitofilin domain protein	blastp_trinity:MIC60_PARBD|68.2;	pfam:MIC60_PARBD|68.2;	1
SteCoe_6125			hypothetical protein	blastp_trinity:NA	pfam:	1
SteCoe_617			hypothetical protein	blastp_trinity:NA	pfam:	1
SteCoe_6230			hypothetical protein	blastp_trinity:R213A_DANRE|374;	pfam:R213A_DANRE|374;	1
SteCoe_6237			hypothetical protein			1
SteCoe_6291			hypothetical protein			1
SteCoe_6373			hypothetical protein			1
SteCoe_6377			DUF1152 domain protein	blastp_trinity:NA	pfam:	1
SteCoe_6427			tRNA-synt_1g domain protein	blastp_trinity:SYMC_ARATH|703;	pfam:SYMC_ARATH|703;	1
SteCoe_6518			FAA_hydrolase_N domain protein	blastp_trinity:FAAA_DICDI|414;	pfam:FAAA_DICDI|414;	1
SteCoe_6538			hypothetical protein	blastp_trinity:NA	pfam:	1
SteCoe_6556			Glyco_transf_5 domain protein	blastp_trinity:GLGA_KOSOT|127;	pfam:GLGA_KOSOT|127;	1
SteCoe_6596			zf-RING_2 domain protein	blastp_trinity:ATL6_ARATH|61.6;	pfam:ATL6_ARATH|61.6;	1
SteCoe_6611			PK domain protein	blastp_trinity:KPYK_EIMTE|548;	pfam:KPYK_EIMTE|548;	1
SteCoe_6624			UQ_con domain protein	blastp_trinity:UBC17_CAEEL|167;	pfam:UBC17_CAEEL|167;	1
SteCoe_6637			hypothetical protein			1
SteCoe_667			hypothetical protein			1
SteCoe_6684			Citrate_synt domain protein	blastp_trinity:CISY1_AEDAE|427;	pfam:CISY1_AEDAE|427;	1
SteCoe_6689			Patatin domain protein	blastp_trinity:NA	pfam:	1
SteCoe_6691			MORN domain protein	blastp_trinity:PI5K3_ARATH|59.7;	pfam:PI5K3_ARATH|59.7;	1
SteCoe_6712			hypothetical protein	blastp_trinity:NA	pfam:	1
SteCoe_6720			Actin domain protein			1
SteCoe_6736			ELFV_dehydrog_N domain protein	blastp_trinity:DHE3_DICDI|424;	pfam:DHE3_DICDI|424;	1
SteCoe_6869			hypothetical protein			1
SteCoe_691			hypothetical protein			1
SteCoe_6918			DUF812 domain protein	blastp_trinity:CCD22_HUMAN|150;	pfam:CCD22_HUMAN|150;	1
SteCoe_706			Chitin_synth_1 domain protein	blastp_trinity:CHSA_AMPQU|280;	pfam:CHSA_AMPQU|280;	1
SteCoe_713			MORN domain protein	blastp_trinity:PI5K8_ARATH|65.5;	pfam:PI5K8_ARATH|65.5;	1
SteCoe_7146			hypothetical protein			1
SteCoe_7158			PPDK_N domain protein	blastp_trinity:GWD2_ARATH|526;	pfam:GWD2_ARATH|526;	1
SteCoe_7167			hypothetical protein			1
SteCoe_7177			WD40 domain protein	blastp_trinity:HETE1_PODAS|56.6;	pfam:HETE1_PODAS|56.6;	1
SteCoe_721			Vps35 domain protein	blastp_trinity:VP35B_ARATH|511;	pfam:VP35B_ARATH|511;	1
SteCoe_7211			hypothetical protein	blastp_trinity:NA	pfam:	1
SteCoe_7238			Kelch_4 domain protein			1
SteCoe_7239			PLK family kinase	blastp_trinity:CCR1_MAIZE|187;	pfam:CCR1_MAIZE|187;	1
SteCoe_7270			DUF2804 domain protein			1
SteCoe_7333			hypothetical protein	blastp_trinity:NA	pfam:	1
SteCoe_7366			WD40 domain protein	blastp_trinity:YY46_NOSS1|64.7;	pfam:YY46_NOSS1|64.7;	1
SteCoe_7424			hypothetical protein			1
SteCoe_7467			hDGE_amylase domain protein	blastp_trinity:GDE_HUMAN|769;	pfam:GDE_HUMAN|769;	1
SteCoe_7471			hypothetical protein			1
SteCoe_7519			hypothetical protein	blastp_trinity:NA	pfam:	1
SteCoe_7525			hypothetical protein			1
SteCoe_7591			PPR domain protein			1
SteCoe_7649			CLASP_N domain protein	blastp_trinity:CKAP5_HUMAN|469;	pfam:CKAP5_HUMAN|469;	1
SteCoe_7812			RINGv domain protein	blastp_trinity:NA	pfam:	1
SteCoe_7851			E1_dh domain protein	blastp_trinity:ODPA_DICDI|380;	pfam:ODPA_DICDI|380;	1
SteCoe_7913			hypothetical protein	blastp_trinity:NA	pfam:	1
SteCoe_7956			CAMK related kinase	blastp_trinity:CIPKB_ORYSJ|172;	pfam:CIPKB_ORYSJ|172;	1
SteCoe_8089			CDPK family kinase	blastp_trinity:CDPK2_PLAFK|369;	pfam:CDPK2_PLAFK|369;	1
SteCoe_8125			hypothetical protein	blastp_trinity:NA	pfam:	1
SteCoe_8132			IBN_N domain protein	blastp_trinity:XPO2_XENLA|53.5;	pfam:XPO2_XENLA|53.5;	1
SteCoe_821			DUF572 domain protein	blastp_trinity:YJU2_DICDI|174;	pfam:YJU2_DICDI|174;	1
SteCoe_828			Metallophos domain protein			1
SteCoe_8287			DUSP domain protein	blastp_trinity:UBP11_ARATH|81.6;	pfam:UBP11_ARATH|81.6;	1
SteCoe_8336			hypothetical protein			1
SteCoe_8517			hypothetical protein	blastp_trinity:2AAA_CAEEL|342;	pfam:2AAA_CAEEL|342;	1
SteCoe_8542			IQ domain protein			1
SteCoe_859			hypothetical protein			1
SteCoe_8607			Hist_deacetyl domain protein	blastp_trinity:HDAC1_CHICK|481;	pfam:HDAC1_CHICK|481;	1
SteCoe_8609			MORN domain protein	blastp_trinity:PI5K4_ARATH|66.6;	pfam:PI5K4_ARATH|66.6;	1
SteCoe_8616			hypothetical protein	blastp_trinity:NA	pfam:	1
SteCoe_8677			hypothetical protein			1
SteCoe_8822			Aminotran_4 domain protein	blastp_trinity:BCAT_DICDI|389;	pfam:BCAT_DICDI|389;	1
SteCoe_8923			hypothetical protein			1
SteCoe_9068			Kinesin domain protein	blastp_trinity:KINH_SYNRA|401;	pfam:KINH_SYNRA|401;	1
SteCoe_9191			CAMK related kinase	blastp_trinity:CDPK4_PLABA|315;	pfam:CDPK4_PLABA|315;	1
SteCoe_9273			Notch domain protein	blastp_trinity:LECB_PHYAM|71.2;	pfam:LECB_PHYAM|71.2;	1
SteCoe_9323			Ank_4 domain protein	blastp_trinity:NA	pfam:	1
SteCoe_9438			ATP-cone domain protein	blastp_trinity:RIR1_ARATH|1047;	pfam:RIR1_ARATH|1047;	1
SteCoe_9509			Arrestin_N domain protein	blastp_trinity:ADCA_DICDI|70.9;	pfam:ADCA_DICDI|70.9;	1
SteCoe_9533			Mito_carr domain protein			1
SteCoe_9537			hypothetical protein	blastp_trinity:NA	pfam:	1
SteCoe_9551			EF-hand_8 domain protein			1
SteCoe_9561			WD40 domain protein	blastp_trinity:YY46_NOSS1|53.1;	pfam:YY46_NOSS1|53.1;	1
SteCoe_9609			C2 domain protein	blastp_trinity:C2D2A_MOUSE|58.9;	pfam:C2D2A_MOUSE|58.9;	1
SteCoe_9629			2-Hacid_dh domain protein	blastp_trinity:SERA_PIG|208;	pfam:SERA_PIG|208;	1
SteCoe_9692		pumilio	PUF domain protein	blastp_trinity:PUM12_ARATH|155;	pfam:PUM12_ARATH|155;	1
SteCoe_9759			UCH domain protein	blastp_trinity:UBP24_HUMAN|246;	pfam:UBP24_HUMAN|246;	1
SteCoe_978			Gp_dh_N domain protein	blastp_trinity:G3P_RHIMI|476;	pfam:G3P_RHIMI|476;	1
SteCoe_9869			GATase_6 domain protein	blastp_trinity:GLMS_CLOAB|271;	pfam:GLMS_CLOAB|271;	1
SteCoe_9879	high		H_PPase domain protein	blastp_trinity:AVP_HORVU|741;	pfam:AVP_HORVU|741;	1
SteCoe_9895			hypothetical protein	blastp_trinity:CPAS1_DICDI|190;	pfam:CPAS1_DICDI|190;	1
SteCoe_9941			Dopey_N domain protein	blastp_trinity:DOP1_MOUSE|107;	pfam:DOP1_MOUSE|107;	1
SteCoe_10047			Akt family kinase	blastp_trinity:KRAC_DICDI|239;	pfam:KRAC_DICDI|239;	2
SteCoe_10059			ubiquitin domain protein	blastp_trinity:P4KG2_ARATH|197;	pfam:P4KG2_ARATH|197;	2
SteCoe_10082			WD40 domain protein	blastp_trinity:KTNB1_STRPU|69.3;	pfam:KTNB1_STRPU|69.3;	2
SteCoe_10117			zf-C3HC4_3 domain protein	blastp_trinity:NA	pfam:	2
SteCoe_10142			Nucleopor_Nup85 domain protein	blastp_trinity:NUP85_HUMAN|67.4;	pfam:NUP85_HUMAN|67.4;	2
SteCoe_10165			hypothetical protein	blastp_trinity:NA	pfam:	2
SteCoe_1032			zf-RING_2 domain protein	blastp_trinity:RNG1L_ARATH|77.0;	pfam:RNG1L_ARATH|77.0;	2
SteCoe_10355			hypothetical protein	blastp_trinity:NA	pfam:	2
SteCoe_10373			hypothetical protein	blastp_trinity:NA	pfam:	2
SteCoe_10389			hypothetical protein	blastp_trinity:HERC5_HUMAN|72.4;	pfam:HERC5_HUMAN|72.4;	2
SteCoe_10477			RabGAP-TBC domain protein	blastp_trinity:TBD2A_MOUSE|90.5;	pfam:TBD2A_MOUSE|90.5;	2
SteCoe_10561			WD40 domain protein	blastp_trinity:HETE1_PODAS|101;	pfam:HETE1_PODAS|101;	2
SteCoe_10578			hypothetical protein	blastp_trinity:NA	pfam:	2
SteCoe_10635			ANAPC5 domain protein	blastp_trinity:NA	pfam:	2
SteCoe_10690			Rxt3 domain protein	blastp_trinity:RXT3_SCHPO|54.7;	pfam:RXT3_SCHPO|54.7;	2
SteCoe_10711			hypothetical protein	blastp_trinity:SRFR1_ARATH|62.4;	pfam:SRFR1_ARATH|62.4;	2
SteCoe_10737			MAPK family kinase	blastp_trinity:ERK1_DICDI|399;	pfam:ERK1_DICDI|399;	2
SteCoe_1081			KIAA1430 domain protein	blastp_trinity:NA	pfam:	2
SteCoe_10835			hypothetical protein	blastp_trinity:NA	pfam:	2
SteCoe_10861			KH_1 domain protein			2
SteCoe_10870			CDPK family kinase	blastp_trinity:CDPK1_PLAYO|310;	pfam:CDPK1_PLAYO|310;	2
SteCoe_10909			Nup84_Nup100 domain protein	blastp_trinity:NU107_HUMAN|69.7;	pfam:NU107_HUMAN|69.7;	2
SteCoe_10927			hypothetical protein			2
SteCoe_10958			Vac14_Fab1_bd domain protein	blastp_trinity:TORL2_ARATH|107;	pfam:TORL2_ARATH|107;	2
SteCoe_11014			ALMS_motif domain protein	blastp_trinity:NA	pfam:	2
SteCoe_11057			NEK family kinase	blastp_trinity:NEK1_MOUSE|223;	pfam:NEK1_MOUSE|223;	2
SteCoe_11061			hypothetical protein			2
SteCoe_11075			Methyltransf_11 domain protein			2
SteCoe_11080			hypothetical protein			2
SteCoe_11093			zf-RING_UBOX domain protein	blastp_trinity:NA	pfam:	2
SteCoe_11112			hypothetical protein			2
SteCoe_11124			Adenylate/Guanylate Cyclase			2
SteCoe_11129			CAF1A domain protein	blastp_trinity:NA	pfam:	2
SteCoe_11213			hypothetical protein	blastp_trinity:NA	pfam:	2
SteCoe_11234			Aurora family kinase	blastp_trinity:ARK1_SCHPO|225;	pfam:ARK1_SCHPO|225;	2
SteCoe_11275			hypothetical protein	blastp_trinity:NA	pfam:	2
SteCoe_11289			hypothetical protein	blastp_trinity:NA	pfam:	2
SteCoe_11312			Kinesin domain protein	blastp_trinity:KN14Q_ARATH|216;	pfam:KN14Q_ARATH|216;	2
SteCoe_11352			hypothetical protein	blastp_trinity:NA	pfam:	2
SteCoe_11409			AZUL domain protein	blastp_trinity:UBE3A_MOUSE|342;	pfam:UBE3A_MOUSE|342;	2
SteCoe_11420		WD40 domain	WD40 domain protein	blastp_trinity:WDR7_HUMAN|60.8;	pfam:WDR7_HUMAN|60.8;	2
SteCoe_11432			hypothetical protein			2
SteCoe_11441			hypothetical protein			2
SteCoe_11449			hypothetical protein	blastp_trinity:NA	pfam:	2
SteCoe_11511			DYRK family kinase	blastp_trinity:POM1_SCHPO|228;	pfam:POM1_SCHPO|228;	2
SteCoe_11542		FAP52	WD40 domain protein	blastp_trinity:CFA52_HUMAN|177;	pfam:CFA52_HUMAN|177;	2
SteCoe_1157			hypothetical protein	blastp_trinity:NA	pfam:	2
SteCoe_11660			Adenylate/Guanylate Cyclase	blastp_trinity:CYAA_ANACY|75.1;	pfam:CYAA_ANACY|75.1;	2
SteCoe_11741			hypothetical protein	blastp_trinity:NA	pfam:	2
SteCoe_11753	high	hypothetical	hypothetical protein	blastp_trinity:C2CD3_MOUSE|53.5;	pfam:NA	2
SteCoe_11829			Aurora family kinase	blastp_trinity:IPL1_CANGA|221;	pfam:IPL1_CANGA|221;	2
SteCoe_11875			TTL domain protein			2
SteCoe_1190		Thiosulfate sulfurtransferase	Rhodanese domain protein	blastp_trinity:CE41A_XENLA|90.9;	pfam:CE41A_XENLA|90.9;	2
SteCoe_12007			hypothetical protein	blastp_trinity:NA	pfam:	2
SteCoe_12057			hypothetical protein	blastp_trinity:NA	pfam:	2
SteCoe_12078			hypothetical protein			2
SteCoe_12085			COPI_assoc domain protein	blastp_trinity:NA	pfam:	2
SteCoe_12108			hypothetical protein			2
SteCoe_12156			IQ domain protein	blastp_trinity:PI5K2_ARATH|60.5;	pfam:PI5K2_ARATH|60.5;	2
SteCoe_12200			Ank_2 domain protein	blastp_trinity:BRD4_DANRE|80.5;	pfam:BRD4_DANRE|80.5;	2
SteCoe_12258			HATPase_c_3 domain protein	blastp_trinity:PMS1_ARATH|128;	pfam:PMS1_ARATH|128;	2
SteCoe_12264			hypothetical protein	blastp_trinity:NA	pfam:	2
SteCoe_12313			GTP_EFTU domain protein			2
SteCoe_12342			hypothetical protein	blastp_trinity:NA	pfam:	2
SteCoe_12343			hypothetical protein			2
SteCoe_12356			Spc97_Spc98 domain protein	blastp_trinity:GCP2_MOUSE|506;	pfam:GCP2_MOUSE|506;	2
SteCoe_1236			hypothetical protein			2
SteCoe_12375			hypothetical protein	blastp_trinity:IPO5_HUMAN|163;	pfam:IPO5_HUMAN|163;	2
SteCoe_12377			Ank_2 domain protein	blastp_trinity:ANR50_HUMAN|56.2;	pfam:ANR50_HUMAN|56.2;	2
SteCoe_12406			DnaJ domain protein			2
SteCoe_12434			RabGAP-TBC domain protein	blastp_trinity:TBC14_HUMAN|164;	pfam:TBC14_HUMAN|164;	2
SteCoe_1258			zf-C2H2 domain protein	blastp_trinity:ZFP2_MOUSE|141;	pfam:ZFP2_MOUSE|141;	2
SteCoe_12623			hypothetical protein	blastp_trinity:NA	pfam:	2
SteCoe_12672			TCR domain protein	blastp_trinity:TCX6_ARATH|166;	pfam:TCX6_ARATH|166;	2
SteCoe_12696			hypothetical protein	blastp_trinity:NA	pfam:	2
SteCoe_1272			hypothetical protein	blastp_trinity:NA	pfam:	2
SteCoe_12747			RNase_PH domain protein			2
SteCoe_12867			hypothetical protein	blastp_trinity:NA	pfam:	2
SteCoe_12932			hypothetical protein			2
SteCoe_12954			hypothetical protein	blastp_trinity:NA	pfam:	2
SteCoe_13001			Proteasom_Rpn13 domain protein	blastp_trinity:RPN13_ARATH|104;	pfam:RPN13_ARATH|104;	2
SteCoe_13036			IQ domain protein	blastp_trinity:NA	pfam:	2
SteCoe_13111			PCI domain protein			2
SteCoe_13116			hypothetical protein			2
SteCoe_13164			CAMKL family kinase	blastp_trinity:MARK3_HUMAN|175;	pfam:MARK3_HUMAN|175;	2
SteCoe_13165			SNF2_N domain protein	blastp_trinity:RAD54_DROME|403;	pfam:RAD54_DROME|403;	2
SteCoe_13206			PAXNEB domain protein			2
SteCoe_13227			Kinesin domain protein			2
SteCoe_13245			hypothetical protein	blastp_trinity:NU188_MOUSE|63.2;	pfam:NU188_MOUSE|63.2;	2
SteCoe_13285			XPG_N domain protein	blastp_trinity:FEN1_TETTS|228;	pfam:FEN1_TETTS|228;	2
SteCoe_1330			Ins145_P3_rec domain protein	blastp_trinity:ITPR1_BOVIN|82.0;	pfam:ITPR1_BOVIN|82.0;	2
SteCoe_13325			hypothetical protein	blastp_trinity:NA	pfam:	2
SteCoe_13335			Iso_dh domain protein			2
SteCoe_13378			GBP domain protein	blastp_trinity:GBP4_HUMAN|209;	pfam:GBP4_HUMAN|209;	2
SteCoe_13430			WD40 domain protein	blastp_trinity:HETE1_PODAS|85.5;	pfam:HETE1_PODAS|85.5;	2
SteCoe_13481			hypothetical protein			2
SteCoe_13494			DUF4200 domain protein	blastp_trinity:NA	pfam:	2
SteCoe_13516			hypothetical protein	blastp_trinity:NA	pfam:	2
SteCoe_13519			WD40 domain protein			2
SteCoe_13544		TPR domain protein	TPR_8 domain protein	blastp_trinity:TTC6_HUMAN|54.3;	pfam:TTC6_HUMAN|54.3;	2
SteCoe_136			WD40 domain protein	blastp_trinity:YY46_NOSS1|142;	pfam:YY46_NOSS1|142;	2
SteCoe_1362			Cnd3 domain protein	blastp_trinity:CND3_HUMAN|74.7;	pfam:CND3_HUMAN|74.7;	2
SteCoe_13657			hypothetical protein	blastp_trinity:NA	pfam:	2
SteCoe_13708			hypothetical protein	blastp_trinity:NA	pfam:	2
SteCoe_13726			ANTH domain protein	blastp_trinity:CAP10_ARATH|63.9;	pfam:CAP10_ARATH|63.9;	2
SteCoe_13740			hypothetical protein			2
SteCoe_13804			LRR_6 domain protein	blastp_trinity:NLRC3_MOUSE|75.1;	pfam:NLRC3_MOUSE|75.1;	2
SteCoe_13805			hypothetical protein	blastp_trinity:NA	pfam:	2
SteCoe_13862			Prenyltrans domain protein	blastp_trinity:FNTB_HUMAN|240;	pfam:FNTB_HUMAN|240;	2
SteCoe_13869			SAM_2 domain protein	blastp_trinity:BIRC7_HUMAN|59.3;	pfam:BIRC7_HUMAN|59.3;	2
SteCoe_13897			hypothetical protein	blastp_trinity:R1AB_CVHN1|73.2;	pfam:NA	2
SteCoe_13912			hypothetical protein			2
SteCoe_14076			hypothetical protein	blastp_trinity:NA	pfam:	2
SteCoe_14244			RCC1 domain protein	blastp_trinity:HERC2_HUMAN|92.8;	pfam:HERC2_HUMAN|92.8;	2
SteCoe_14326			PEK family kinase	blastp_trinity:GCN2_ARATH|157;	pfam:GCN2_ARATH|157;	2
SteCoe_14380			TTL domain protein	blastp_trinity:TTL6A_TETTS|397;	pfam:TTL6A_TETTS|397;	2
SteCoe_1443			hypothetical protein			2
SteCoe_14467			TPR_16 domain protein			2
SteCoe_14583			CDPK family kinase			2
SteCoe_14601			Dynamin_N domain protein			2
SteCoe_14646			ACT_6 domain protein			2
SteCoe_14700			kinase related to Ciliate-E2-Unclassified subfamily			2
SteCoe_14710			WD40 domain protein	blastp_trinity:YY46_NOSS1|63.2;	pfam:YY46_NOSS1|63.2;	2
SteCoe_14724			MutL_C domain protein	blastp_trinity:MUTL_PELPB|105;	pfam:MUTL_PELPB|105;	2
SteCoe_14770			hypothetical protein	blastp_trinity:NA	pfam:	2
SteCoe_14779			hypothetical protein			2
SteCoe_14780			hypothetical protein			2
SteCoe_14826			hypothetical protein	blastp_trinity:NA	pfam:	2
SteCoe_14848			DNA_primase_lrg domain protein	blastp_trinity:PRI2_MOUSE|191;	pfam:PRI2_MOUSE|191;	2
SteCoe_14874			NIF domain protein			2
SteCoe_14987			hypothetical protein			2
SteCoe_15051			WD40 domain protein	blastp_trinity:Y2124_NOSS1|69.3;	pfam:Y2124_NOSS1|69.3;	2
SteCoe_15100			hypothetical protein			2
SteCoe_15107			hypothetical protein			2
SteCoe_15118			hypothetical protein			2
SteCoe_15149			hypothetical protein	blastp_trinity:NA	pfam:	2
SteCoe_15256			hypothetical protein	blastp_trinity:F172A_DICDI|201;	pfam:F172A_DICDI|201;	2
SteCoe_1532			hypothetical protein			2
SteCoe_15389			ADK domain protein			2
SteCoe_15420			hypothetical protein	blastp_trinity:IMPA4_ARATH|63.9;	pfam:IMPA4_ARATH|63.9;	2
SteCoe_15423			tRNA_anti-codon domain protein	blastp_trinity:RFA1C_ARATH|185;	pfam:RFA1C_ARATH|185;	2
SteCoe_155		NPHP3	TPR_12 domain protein	blastp_trinity:NPHP3_MOUSE|55.5;	pfam:NPHP3_MOUSE|55.5;	2
SteCoe_15527			RdRP domain protein	blastp_trinity:RDR1_ORYSJ|397;	pfam:RDR1_ORYSJ|397;	2
SteCoe_15608			Ndc80_HEC domain protein	blastp_trinity:NDC80_XENLA|107;	pfam:NDC80_XENLA|107;	2
SteCoe_15625			Kinesin domain protein	blastp_trinity:KN13B_ARATH|422;	pfam:KN13B_ARATH|422;	2
SteCoe_15672			Metallophos domain protein	blastp_trinity:PP2BA_DICDI|484;	pfam:PP2BA_DICDI|484;	2
SteCoe_15674			TTL domain protein	blastp_trinity:TTL3A_TETTS|263;	pfam:TTL3A_TETTS|263;	2
SteCoe_15711			hypothetical protein			2
SteCoe_15729			Cation_ATPase_N domain protein	blastp_trinity:ACA11_ARATH|443;	pfam:ACA11_ARATH|443;	2
SteCoe_15846			hypothetical protein	blastp_trinity:NA	pfam:	2
SteCoe_15857			hypothetical protein	blastp_trinity:PP6R2_MOUSE|82.8;	pfam:PP6R2_MOUSE|82.8;	2
SteCoe_15861			hypothetical protein	blastp_trinity:NA	pfam:	2
SteCoe_15988			TPR_11 domain protein	blastp_trinity:RPAP3_XENTR|113;	pfam:RPAP3_XENTR|113;	2
SteCoe_16063			hypothetical protein	blastp_trinity:NA	pfam:	2
SteCoe_16164			C2 domain protein			2
SteCoe_16166		pumilio	PUF domain protein	blastp_trinity:PUM_DROME|73.9;	pfam:PUM_DROME|73.9;	2
SteCoe_16170			RabGAP-TBC domain protein	blastp_trinity:GRT1A_DANRE|90.5;	pfam:GRT1A_DANRE|90.5;	2
SteCoe_16190			TPR_8 domain protein	blastp_trinity:TTC6_HUMAN|79.3;	pfam:TTC6_HUMAN|79.3;	2
SteCoe_16276			CBFD_NFYB_HMF domain protein	blastp_trinity:H2A_PODAS|94.0;	pfam:H2A_PODAS|94.0;	2
SteCoe_16319			hypothetical protein			2
SteCoe_16325			MORN domain protein	blastp_trinity:PI5K6_ARATH|63.2;	pfam:PI5K6_ARATH|63.2;	2
SteCoe_16348			hypothetical protein	blastp_trinity:NA	pfam:	2
SteCoe_16359			Sad1_UNC domain protein	blastp_trinity:SUN3_BOVIN|86.7;	pfam:SUN3_BOVIN|86.7;	2
SteCoe_16360		hypothetical protein	hypothetical protein	blastp_trinity:NA	pfam:	2
SteCoe_16428			hypothetical protein			2
SteCoe_16495			hypothetical protein	blastp_trinity:NA	pfam:	2
SteCoe_16503			PP2C domain protein	blastp_trinity:P2C35_ARATH|157;	pfam:P2C35_ARATH|157;	2
SteCoe_16608			MORN domain protein			2
SteCoe_1663			hypothetical protein	blastp_trinity:K132L_MOUSE|138;	pfam:K132L_MOUSE|138;	2
SteCoe_16635			hypothetical protein	blastp_trinity:NA	pfam:	2
SteCoe_16711			Cyclin	blastp_trinity:CCNE1_CHICK|108;	pfam:CCNE1_CHICK|108;	2
SteCoe_16738			hypothetical protein			2
SteCoe_16761			Sec1 domain protein	blastp_trinity:SEC1_DICDI|202;	pfam:SEC1_DICDI|202;	2
SteCoe_16782			hypothetical protein	blastp_trinity:IMA1_YEAST|119;	pfam:IMA1_YEAST|119;	2
SteCoe_16864	high		hypothetical protein	blastp_trinity:NA	pfam:	2
SteCoe_1688			hypothetical protein	blastp_trinity:NA	pfam:	2
SteCoe_16916			hypothetical protein	blastp_trinity:NA	pfam:	2
SteCoe_1695			Ank_2 domain protein	blastp_trinity:PSD10_DICDI|63.5;	pfam:PSD10_DICDI|63.5;	2
SteCoe_16962			hypothetical protein	blastp_trinity:NA	pfam:	2
SteCoe_17035			hypothetical protein			2
SteCoe_17085			hypothetical protein			2
SteCoe_17086			DSPc domain protein	blastp_trinity:MKP1_ARATH|182;	pfam:MKP1_ARATH|182;	2
SteCoe_1710			hypothetical protein	blastp_trinity:NA	pfam:	2
SteCoe_17118			hypothetical protein			2
SteCoe_1713			ADP_ribosyl_GH domain protein	blastp_trinity:ADPRM_MIMIV|101;	pfam:ADPRM_MIMIV|101;	2
SteCoe_17178			hypothetical protein			2
SteCoe_17249			Abhydrolase_3 domain protein	blastp_trinity:LIPS_RAT|132;	pfam:LIPS_RAT|132;	2
SteCoe_17253			hypothetical protein	blastp_trinity:R1AB_CVHN1|57.4;	pfam:NA	2
SteCoe_17270			Autophagy_N domain protein	blastp_trinity:ATG3_ARATH|237;	pfam:ATG3_ARATH|237;	2
SteCoe_17343			hypothetical protein	blastp_trinity:NA	pfam:	2
SteCoe_17381			hypothetical protein	blastp_trinity:NA	pfam:	2
SteCoe_17410			TPR_8 domain protein			2
SteCoe_17504			MORN domain protein			2
SteCoe_17548			RCC1 domain protein	blastp_trinity:HERC1_HUMAN|55.5;	pfam:HERC1_HUMAN|55.5;	2
SteCoe_1761			hypothetical protein	blastp_trinity:NA	pfam:	2
SteCoe_17650			hypothetical protein	blastp_trinity:NA	pfam:	2
SteCoe_17703			NTP_transf_2 domain protein	blastp_trinity:PAPD5_HUMAN|99.0;	pfam:PAPD5_HUMAN|99.0;	2
SteCoe_17779	high		CAMSAP_CKK domain protein	blastp_trinity:PTRO_DROME|70.5;	pfam:PTRO_DROME|70.5;	2
SteCoe_17805			RCC1 domain protein			2
SteCoe_17829			CDPK-like predicted pseudokinase	blastp_trinity:CDPK4_PLABA|182;	pfam:CDPK4_PLABA|182;	2
SteCoe_17836			hypothetical protein	blastp_trinity:NA	pfam:	2
SteCoe_17904			hypothetical protein	blastp_trinity:NA	pfam:	2
SteCoe_17945			ANF_receptor domain protein	blastp_trinity:GRLE_DICDI|85.1;	pfam:GRLE_DICDI|85.1;	2
SteCoe_17997			UCH domain protein	blastp_trinity:UBP12_ARATH|351;	pfam:UBP12_ARATH|351;	2
SteCoe_18001			hypothetical protein	blastp_trinity:NA	pfam:	2
SteCoe_1806			hypothetical protein	blastp_trinity:NA	pfam:	2
SteCoe_18083		VFL3	hypothetical protein	blastp_trinity:CCD61_RAT|97.4;	pfam:CCD61_RAT|97.4;	2
SteCoe_1816			ANAPC4_WD40 domain protein	blastp_trinity:SRW1_SCHPO|293;	pfam:SRW1_SCHPO|293;	2
SteCoe_1818			STPPase_N domain protein	blastp_trinity:PP1B_XENTR|549;	pfam:PP1B_XENTR|549;	2
SteCoe_18181			hypothetical protein	blastp_trinity:NA	pfam:	2
SteCoe_18241			hypothetical protein			2
SteCoe_18254			hypothetical protein			2
SteCoe_18440			IBN_N domain protein	blastp_trinity:IMB1_ARATH|259;	pfam:IMB1_ARATH|259;	2
SteCoe_18455			hypothetical protein	blastp_trinity:NA	pfam:	2
SteCoe_18552			hypothetical protein	blastp_trinity:NA	pfam:	2
SteCoe_18661			hypothetical protein	blastp_trinity:ARMC2_BOVIN|79.0;	pfam:ARMC2_BOVIN|79.0;	2
SteCoe_18690			hypothetical protein			2
SteCoe_18695			ANF_receptor domain protein	blastp_trinity:NA	pfam:	2
SteCoe_18738			hypothetical protein			2
SteCoe_18742			MORN domain protein	blastp_trinity:PI5K6_ARATH|49.7;	pfam:PI5K6_ARATH|49.7;	2
SteCoe_18768			hypothetical protein	blastp_trinity:NA	pfam:	2
SteCoe_18847			MCM_N domain protein	blastp_trinity:MCM3_ORYSJ|600;	pfam:MCM3_ORYSJ|600;	2
SteCoe_18851			NDR kinase	blastp_trinity:ST38L_HUMAN|375;	pfam:ST38L_HUMAN|375;	2
SteCoe_18896			LRR_6 domain protein	blastp_trinity:NLRC3_HUMAN|52.4;	pfam:NLRC3_HUMAN|52.4;	2
SteCoe_19074			zf-C3HC4_3 domain protein	blastp_trinity:NA	pfam:	2
SteCoe_1908			hypothetical protein	blastp_trinity:CCD77_MOUSE|80.1;	pfam:CCD77_MOUSE|80.1;	2
SteCoe_19093			kinase related to Ciliate-A9 family	blastp_trinity:CAMKI_MACNP|169;	pfam:CAMKI_MACNP|169;	2
SteCoe_19114			hypothetical protein			2
SteCoe_19137			TPR_8 domain protein	blastp_trinity:Y1345_METJA|68.2;	pfam:Y1345_METJA|68.2;	2
SteCoe_19143			hypothetical protein	blastp_trinity:NA	pfam:	2
SteCoe_19219			hypothetical protein	blastp_trinity:NA	pfam:	2
SteCoe_19285			UCH domain protein	blastp_trinity:UBP12_ARATH|295;	pfam:UBP12_ARATH|295;	2
SteCoe_19305			C2 domain protein	blastp_trinity:NA	pfam:	2
SteCoe_19361			Ion_trans domain protein	blastp_trinity:YY46_NOSS1|57.4;	pfam:YY46_NOSS1|57.4;	2
SteCoe_19362			hypothetical protein			2
SteCoe_19366			CDPK family kinase	blastp_trinity:CDPK1_PLAFK|410;	pfam:CDPK1_PLAFK|410;	2
SteCoe_19378			hypothetical protein			2
SteCoe_19417			hypothetical protein			2
SteCoe_19496			PP2C domain protein	blastp_trinity:P2C73_ARATH|164;	pfam:P2C73_ARATH|164;	2
SteCoe_19632			hypothetical protein	blastp_trinity:NA	pfam:	2
SteCoe_19661			hypothetical protein			2
SteCoe_19733			hypothetical protein			2
SteCoe_19772			EF-hand_7 domain protein	blastp_trinity:CATR_SCHDU|249;	pfam:CATR_SCHDU|249;	2
SteCoe_19867			hypothetical protein	blastp_trinity:NA	pfam:	2
SteCoe_19919			cNMP_binding domain protein			2
SteCoe_19930			hypothetical protein	blastp_trinity:NA	pfam:	2
SteCoe_19971			hypothetical protein	blastp_trinity:NA	pfam:	2
SteCoe_20018			hypothetical protein	blastp_trinity:NA	pfam:	2
SteCoe_20027			DUF667 domain protein			2
SteCoe_20035			Motile_Sperm domain protein			2
SteCoe_20095			CDPK family kinase	blastp_trinity:CDPK1_PLAFK|308;	pfam:CDPK1_PLAFK|308;	2
SteCoe_20126			hypothetical protein			2
SteCoe_20165			hypothetical protein	blastp_trinity:NA	pfam:	2
SteCoe_20226			Chorein_N domain protein			2
SteCoe_20311			hypothetical protein	blastp_trinity:NA	pfam:	2
SteCoe_20337			E2F_TDP domain protein	blastp_trinity:DPB_ARATH|77.0;	pfam:DPB_ARATH|77.0;	2
SteCoe_20365			hypothetical protein	blastp_trinity:NA	pfam:	2
SteCoe_20508			hypothetical protein			2
SteCoe_20530			TTL domain protein	blastp_trinity:TTL3E_TETTS|101;	pfam:TTL3E_TETTS|101;	2
SteCoe_20645			hypothetical protein			2
SteCoe_2079			zf-HC5HC2H_2 domain protein			2
SteCoe_20794			hypothetical protein	blastp_trinity:TORL1_ARATH|53.5;	pfam:TORL1_ARATH|53.5;	2
SteCoe_20843			hypothetical protein			2
SteCoe_20861			LRR_6 domain protein			2
SteCoe_20922			C2 domain protein	blastp_trinity:DYSF_BOVIN|100;	pfam:DYSF_BOVIN|100;	2
SteCoe_20952		CEP104	XRCC1_N domain protein	blastp_trinity:CE104_HUMAN|332;	pfam:CE104_HUMAN|332;	2
SteCoe_21085			Cyclin			2
SteCoe_21092			hypothetical protein	blastp_trinity:NA	pfam:	2
SteCoe_21107			hypothetical protein			2
SteCoe_21216			TTL domain protein	blastp_trinity:TTL3B_TETTS|153;	pfam:TTL3B_TETTS|153;	2
SteCoe_21247			RabGAP-TBC domain protein	blastp_trinity:RBG1L_HUMAN|99.4;	pfam:RBG1L_HUMAN|99.4;	2
SteCoe_21283			hypothetical protein	blastp_trinity:NA	pfam:	2
SteCoe_21364			hypothetical protein			2
SteCoe_21380		SUN1	Sad1_UNC domain protein	blastp_trinity:SUN1_MOUSE|70.9;	pfam:SUN1_MOUSE|70.9;	2
SteCoe_21411			hypothetical protein	blastp_trinity:NA	pfam:	2
SteCoe_21561			hypothetical protein			2
SteCoe_21567			Amidohydro_1 domain protein	blastp_trinity:HUTI_DICDI|449;	pfam:HUTI_DICDI|449;	2
SteCoe_21643			hypothetical protein			2
SteCoe_21899			Guanylate Cyclase with N-terminal phospholipid ATPase domain	blastp_trinity:AT8A1_HUMAN|745;	pfam:AT8A1_HUMAN|745;	2
SteCoe_21922			hypothetical protein	blastp_trinity:NA	pfam:	2
SteCoe_21932	high		TPR_1 domain protein	blastp_trinity:SEC_ARATH|98.6;	pfam:SEC_ARATH|98.6;	2
SteCoe_21965			LRR_9 domain protein	blastp_trinity:RU2A_ARATH|150;	pfam:RU2A_ARATH|150;	2
SteCoe_22076			hypothetical protein			2
SteCoe_22096			hypothetical protein	blastp_trinity:NA	pfam:	2
SteCoe_22102			DSPn domain protein			2
SteCoe_2217			START domain protein			2
SteCoe_22177			hypothetical protein			2
SteCoe_2222			DUF4200 domain protein	blastp_trinity:NA	pfam:	2
SteCoe_22274			hypothetical protein			2
SteCoe_22397			NEK family kinase			2
SteCoe_22413			PLK family kinase	blastp_trinity:CCR1_MAIZE|544;	pfam:CCR1_MAIZE|544;	2
SteCoe_22414			zf-RING_UBOX domain protein	blastp_trinity:RC3H1_MOUSE|64.3;	pfam:RC3H1_MOUSE|64.3;	2
SteCoe_22416			Acetyltransf_16 domain protein	blastp_trinity:ATAT_TETTS|171;	pfam:ATAT_TETTS|171;	2
SteCoe_22448			hypothetical protein	blastp_trinity:NA	pfam:	2
SteCoe_22546			ABC2_membrane_3 domain protein	blastp_trinity:ABCA3_HUMAN|207;	pfam:ABCA3_HUMAN|207;	2
SteCoe_22559			EF-hand_7 domain protein			2
SteCoe_22583			FSIP1 domain protein	blastp_trinity:NA	pfam:	2
SteCoe_22591			RCC1 domain protein	blastp_trinity:HERC2_DROME|53.1;	pfam:HERC2_DROME|53.1;	2
SteCoe_22593		ODA1 outer dynein arm docking complex 1	hypothetical protein	blastp_trinity:ODA1_CHLRE|92.0;	pfam:ODA1_CHLRE|92.0;	2
SteCoe_22606			hypothetical protein	blastp_trinity:NA	pfam:	2
SteCoe_2264			hypothetical protein	blastp_trinity:NA	pfam:	2
SteCoe_22714			hypothetical protein			2
SteCoe_22751		TULP3 ciliary trafficking protein	Tub domain protein	blastp_trinity:TULP3_MOUSE|251;	pfam:TULP3_MOUSE|251;	2
SteCoe_22876			hypothetical protein	blastp_trinity:CFA99_CHLRE|119;	pfam:NA	2
SteCoe_2289			hypothetical protein	blastp_trinity:NA	pfam:	2
SteCoe_22958			POT1 domain protein	blastp_trinity:NA	pfam:	2
SteCoe_23007			Vps8 domain protein	blastp_trinity:VPS8_MOUSE|216;	pfam:VPS8_MOUSE|216;	2
SteCoe_2302			Tubulin domain protein			2
SteCoe_23108		CEP76	CEP76-C2 domain protein	blastp_trinity:CEP76_HUMAN|427;	pfam:CEP76_HUMAN|427;	2
SteCoe_23209			hypothetical protein	blastp_trinity:NA	pfam:	2
SteCoe_2324			NEK family kinase	blastp_trinity:NEK1_MOUSE|329;	pfam:NEK1_MOUSE|329;	2
SteCoe_23335			NEK family kinase	blastp_trinity:NEK6_RAT|193;	pfam:NEK6_RAT|193;	2
SteCoe_23422			hypothetical protein			2
SteCoe_23465			RB_A domain protein			2
SteCoe_23507			DUF566 domain protein	blastp_trinity:NA	pfam:	2
SteCoe_23547	high		HATPase_c_3 domain protein	blastp_trinity:MLH1_ARATH|345;	pfam:MLH1_ARATH|345;	2
SteCoe_23631			CAMK related kinase	blastp_trinity:KCC1A_HUMAN|188;	pfam:KCC1A_HUMAN|188;	2
SteCoe_23710			hypothetical protein			2
SteCoe_23783			hypothetical protein	blastp_trinity:IMA1_HUMAN|86.7;	pfam:IMA1_HUMAN|86.7;	2
SteCoe_23797			hypothetical protein	blastp_trinity:NA	pfam:	2
SteCoe_23870			hypothetical protein			2
SteCoe_23967			hypothetical protein			2
SteCoe_24002			hypothetical protein	blastp_trinity:NA	pfam:	2
SteCoe_24070			Topoisom_I_N domain protein	blastp_trinity:TOP1B_ARATH|514;	pfam:TOP1B_ARATH|514;	2
SteCoe_24072			hypothetical protein			2
SteCoe_24182			Telomerase_RBD domain protein	blastp_trinity:TERT_OXYTR|200;	pfam:TERT_OXYTR|200;	2
SteCoe_24201			kinase related to cdc2 subfamily	blastp_trinity:CDK1A_XENLA|381;	pfam:CDK1A_XENLA|381;	2
SteCoe_24233			TPR_8 domain protein	blastp_trinity:TTC16_MOUSE|61.6;	pfam:TTC16_MOUSE|61.6;	2
SteCoe_24243			hypothetical protein	blastp_trinity:NA	pfam:	2
SteCoe_24276			hypothetical protein			2
SteCoe_24301			hypothetical protein			2
SteCoe_24470			adh_short domain protein			2
SteCoe_24471			SPT6_acidic domain protein	blastp_trinity:SPT62_ARATH|322;	pfam:SPT62_ARATH|322;	2
SteCoe_24475			NIF domain protein	blastp_trinity:CPL4_ARATH|199;	pfam:CPL4_ARATH|199;	2
SteCoe_2448			hypothetical protein	blastp_trinity:NA	pfam:	2
SteCoe_24489			TBPIP domain protein	blastp_trinity:HOP2_MOUSE|82.0;	pfam:HOP2_MOUSE|82.0;	2
SteCoe_24518			DUF908 domain protein	blastp_trinity:NA	pfam:	2
SteCoe_24605			14-3-3 domain protein	blastp_trinity:14338_ARATH|258;	pfam:14338_ARATH|258;	2
SteCoe_2462			hypothetical protein	blastp_trinity:NA	pfam:	2
SteCoe_2469			hypothetical protein			2
SteCoe_24724			Kinesin domain protein	blastp_trinity:KRP95_STRPU|334;	pfam:KRP95_STRPU|334;	2
SteCoe_24752			REPA_OB_2 domain protein	blastp_trinity:RFA1B_ARATH|162;	pfam:RFA1B_ARATH|162;	2
SteCoe_24780			HMG_box domain protein	blastp_trinity:NHP6_CANAL|59.7;	pfam:NHP6_CANAL|59.7;	2
SteCoe_24790			Kelch_6 domain protein	blastp_trinity:GEFF_DICDI|80.5;	pfam:GEFF_DICDI|80.5;	2
SteCoe_24931			HSA domain protein	blastp_trinity:DOM_DROME|65.5;	pfam:DOM_DROME|65.5;	2
SteCoe_24967	high		hypothetical protein	blastp_trinity:NA	pfam:	2
SteCoe_24994			hypothetical protein	blastp_trinity:NA	pfam:	2
SteCoe_25012			hypothetical protein			2
SteCoe_25022			hypothetical protein	blastp_trinity:TRAD1_BOVIN|71.2;	pfam:TRAD1_BOVIN|71.2;	2
SteCoe_25121			hypothetical protein			2
SteCoe_25135			Ins145_P3_rec domain protein			2
SteCoe_25184			PKA family kinase	blastp_trinity:PRKX_HUMAN|353;	pfam:PRKX_HUMAN|353;	2
SteCoe_25221			hypothetical protein	blastp_trinity:NA	pfam:	2
SteCoe_25223			hypothetical protein	blastp_trinity:NA	pfam:	2
SteCoe_25255			MORN domain protein			2
SteCoe_25285		Joubert syndrome protein B9D1	B9-C2 domain protein	blastp_trinity:B9D1_MOUSE|160;	pfam:B9D1_MOUSE|160;	2
SteCoe_25362			OHA domain protein	blastp_trinity:NA	pfam:	2
SteCoe_25375			Cyclin	blastp_trinity:CCB15_ORYSJ|75.1;	pfam:CCB15_ORYSJ|75.1;	2
SteCoe_25410			hypothetical protein			2
SteCoe_25413			hypothetical protein	blastp_trinity:IMA4_HUMAN|95.1;	pfam:IMA4_HUMAN|95.1;	2
SteCoe_25414			DYRK family kinase	blastp_trinity:DYRK3_RAT|307;	pfam:DYRK3_RAT|307;	2
SteCoe_25415			ZZ domain protein	blastp_trinity:NA	pfam:	2
SteCoe_25427			hypothetical protein			2
SteCoe_25443			hypothetical protein	blastp_trinity:NA	pfam:	2
SteCoe_25473			hypothetical protein	blastp_trinity:NA	pfam:	2
SteCoe_25484			Ion_trans domain protein	blastp_trinity:SLO_DROME|144;	pfam:SLO_DROME|144;	2
SteCoe_25485			IQ domain protein	blastp_trinity:PI5K1_ARATH|105;	pfam:PI5K1_ARATH|105;	2
SteCoe_25511			hypothetical protein			2
SteCoe_25544			hypothetical protein	blastp_trinity:NA	pfam:	2
SteCoe_25633			hypothetical protein	blastp_trinity:NA	pfam:	2
SteCoe_25637			hypothetical protein	blastp_trinity:IPO5_MOUSE|165;	pfam:IPO5_MOUSE|165;	2
SteCoe_25793			IQ domain protein	blastp_trinity:NA	pfam:	2
SteCoe_25842			Urocanase domain protein			2
SteCoe_25867			hypothetical protein			2
SteCoe_25911			RCC1_2 domain protein	blastp_trinity:HERC4_MOUSE|66.6;	pfam:HERC4_MOUSE|66.6;	2
SteCoe_2595			Laminin_G_3 domain protein	blastp_trinity:FRAS1_MOUSE|87.8;	pfam:FRAS1_MOUSE|87.8;	2
SteCoe_26004			Kelch_1 domain protein			2
SteCoe_26066			hypothetical protein	blastp_trinity:NA	pfam:	2
SteCoe_2616			ARL2_Bind_BART domain protein	blastp_trinity:AR2BP_HUMAN|100;	pfam:AR2BP_HUMAN|100;	2
SteCoe_26221			GRAM domain protein	blastp_trinity:YSP2_YEAST|53.9;	pfam:YSP2_YEAST|53.9;	2
SteCoe_26242			WD40 domain protein	blastp_trinity:CAF4_YEAS7|87.0;	pfam:CAF4_YEAS7|87.0;	2
SteCoe_26290			Glyco_hydro_38 domain protein	blastp_trinity:NA	pfam:	2
SteCoe_26355			Ion_trans domain protein	blastp_trinity:NA	pfam:	2
SteCoe_26356			zf-RanBP domain protein	blastp_trinity:NA	pfam:	2
SteCoe_26380			Ank_2 domain protein	blastp_trinity:MTPN_CHICK|52.0;	pfam:MTPN_CHICK|52.0;	2
SteCoe_26590			SK_channel domain protein			2
SteCoe_26605			Gryzun-like domain protein	blastp_trinity:TPC11_DANRE|108;	pfam:TPC11_DANRE|108;	2
SteCoe_26670			DUF4378 domain protein	blastp_trinity:NA	pfam:	2
SteCoe_26689			HOOK domain protein	blastp_trinity:HOOK_BRAFL|102;	pfam:HOOK_BRAFL|102;	2
SteCoe_26693			ARL2_Bind_BART domain protein	blastp_trinity:AR2BP_CHICK|99.8;	pfam:AR2BP_CHICK|99.8;	2
SteCoe_26722			MIF4G domain protein	blastp_trinity:IF4G_WHEAT|113;	pfam:IF4G_WHEAT|113;	2
SteCoe_2674			hypothetical protein			2
SteCoe_26771			hypothetical protein	blastp_trinity:NA	pfam:	2
SteCoe_26851	high		NIF domain protein	blastp_trinity:PSR2_YEAST|129;	pfam:PSR2_YEAST|129;	2
SteCoe_26852			hypothetical protein	blastp_trinity:IMPA5_ARATH|121;	pfam:IMPA5_ARATH|121;	2
SteCoe_26916			MFS_1 domain protein	blastp_trinity:SPNS2_ARATH|193;	pfam:SPNS2_ARATH|193;	2
SteCoe_26958			AAA_28 domain protein	blastp_trinity:TTD14_DROME|221;	pfam:TTD14_DROME|221;	2
SteCoe_26966			hypothetical protein	blastp_trinity:SIAH2_DANRE|77.8;	pfam:SIAH2_DANRE|77.8;	2
SteCoe_27335			IBN_N domain protein	blastp_trinity:IPO9_MOUSE|198;	pfam:IPO9_MOUSE|198;	2
SteCoe_27381			MORN domain protein			2
SteCoe_27456			hypothetical protein	blastp_trinity:MOR1_ORYSJ|56.6;	pfam:MOR1_ORYSJ|56.6;	2
SteCoe_27477		TULP1 tubby like protein 1	Tub domain protein	blastp_trinity:TUB_HUMAN|255;	pfam:TUB_HUMAN|255;	2
SteCoe_27503			hypothetical protein			2
SteCoe_27519			hypothetical protein			2
SteCoe_27594			hypothetical protein			2
SteCoe_27629			hypothetical protein	blastp_trinity:NA	pfam:	2
SteCoe_27645			hypothetical protein			2
SteCoe_27835			DNA_pol_E_B domain protein	blastp_trinity:DPOA2_HUMAN|88.6;	pfam:DPOA2_HUMAN|88.6;	2
SteCoe_27847			Kinesin domain protein	blastp_trinity:KINH_SYNRA|420;	pfam:KINH_SYNRA|420;	2
SteCoe_27897			hypothetical protein	blastp_trinity:NA	pfam:	2
SteCoe_27924			hypothetical protein	blastp_trinity:TYY2_HUMAN|142;	pfam:TYY2_HUMAN|142;	2
SteCoe_27955			hypothetical protein	blastp_trinity:NA	pfam:	2
SteCoe_27961			hypothetical protein			2
SteCoe_27996			Kelch_1 domain protein	blastp_trinity:KLHL8_CAEEL|56.6;	pfam:KLHL8_CAEEL|56.6;	2
SteCoe_28013			hypothetical protein	blastp_trinity:NA	pfam:	2
SteCoe_2805			hypothetical protein			2
SteCoe_2812			Ldh_1_N domain protein	blastp_trinity:MDH_PSYWF|330;	pfam:MDH_PSYWF|330;	2
SteCoe_2814			hypothetical protein	blastp_trinity:NA	pfam:	2
SteCoe_28222			hypothetical protein	blastp_trinity:NA	pfam:	2
SteCoe_28292			hypothetical protein	blastp_trinity:IMA1A_ORYSJ|97.1;	pfam:IMA1A_ORYSJ|97.1;	2
SteCoe_28362			MFS_1 domain protein	blastp_trinity:NA	pfam:	2
SteCoe_28374		CSE1	IBN_N domain protein	blastp_trinity:XPO2_PAGMA|344;	pfam:XPO2_PAGMA|344;	2
SteCoe_28471			CK2 family kinase	blastp_trinity:CSK2A_SCHPO|327;	pfam:CSK2A_SCHPO|327;	2
SteCoe_28490			hypothetical protein	blastp_trinity:DAAF5_MOUSE|127;	pfam:DAAF5_MOUSE|127;	2
SteCoe_28502			AGC kinase			2
SteCoe_28583			DUF4455 domain protein	blastp_trinity:NA	pfam:	2
SteCoe_28644			NEK family kinase	blastp_trinity:NEK1_MOUSE|326;	pfam:NEK1_MOUSE|326;	2
SteCoe_28660			Cyclin	blastp_trinity:CCNB2_MOUSE|180;	pfam:CCNB2_MOUSE|180;	2
SteCoe_28665		CEP120	hypothetical protein	blastp_trinity:CE120_HUMAN|101;	pfam:CE120_HUMAN|101;	2
SteCoe_2867			hypothetical protein			2
SteCoe_28792			hypothetical protein	blastp_trinity:NA	pfam:	2
SteCoe_28798			hypothetical protein			2
SteCoe_2881			MBF1 domain protein	blastp_trinity:MBF1B_ARATH|95.5;	pfam:MBF1B_ARATH|95.5;	2
SteCoe_28813			Lactamase_B_2 domain protein	blastp_trinity:DCR1B_DANRE|179;	pfam:DCR1B_DANRE|179;	2
SteCoe_28821	high		hypothetical protein	blastp_trinity:NA	pfam:	2
SteCoe_28864			Rubis-subs-bind domain protein	blastp_trinity:RBCMT_ARATH|53.1;	pfam:RBCMT_ARATH|53.1;	2
SteCoe_28918		CSE1	Cse1 domain protein	blastp_trinity:XPO2_ORENI|293;	pfam:XPO2_ORENI|293;	2
SteCoe_28989			Ras domain protein	blastp_trinity:RABF1_ARATH|172;	pfam:RABF1_ARATH|172;	2
SteCoe_28993			Kinesin domain protein	blastp_trinity:KN14E_ORYSJ|372;	pfam:KN14E_ORYSJ|372;	2
SteCoe_29024			hypothetical protein			2
SteCoe_29042			hypothetical protein	blastp_trinity:NA	pfam:	2
SteCoe_29045			eIF-5_eIF-2B domain protein	blastp_trinity:IF5_HUMAN|149;	pfam:IF5_HUMAN|149;	2
SteCoe_29071			hypothetical protein			2
SteCoe_29168			hypothetical protein			2
SteCoe_29236			START domain protein	blastp_trinity:STA10_HUMAN|71.2;	pfam:STA10_HUMAN|71.2;	2
SteCoe_29251			Guanylate Cyclase with N-terminal phospholipid ATPase domain			2
SteCoe_29361			Ferrochelatase domain protein	blastp_trinity:HEMH_BOVIN|275;	pfam:HEMH_BOVIN|275;	2
SteCoe_29438			hypothetical protein			2
SteCoe_29454			LRR_8 domain protein	blastp_trinity:XRRA1_MOUSE|72.0;	pfam:XRRA1_MOUSE|72.0;	2
SteCoe_2950			PP2C domain protein			2
SteCoe_29508			hypothetical protein			2
SteCoe_29541			hypothetical protein			2
SteCoe_29556			SAM_1 domain protein	blastp_trinity:NA	pfam:	2
SteCoe_29571			hypothetical protein			2
SteCoe_29612		CEP131/AZI	hypothetical protein	blastp_trinity:CP131_MOUSE|101;	pfam:CP131_MOUSE|101;	2
SteCoe_29619			Ank_3 domain protein	blastp_trinity:ANK1_HUMAN|57.4;	pfam:ANK1_HUMAN|57.4;	2
SteCoe_2966			SNF2_N domain protein	blastp_trinity:BTAF1_HUMAN|426;	pfam:BTAF1_HUMAN|426;	2
SteCoe_29661	high		GAS2 domain protein	blastp_trinity:NA	pfam:	2
SteCoe_29685			Aminotran_3 domain protein			2
SteCoe_29715			RCK family kinase	blastp_trinity:MAK_MOUSE|347;	pfam:MAK_MOUSE|347;	2
SteCoe_29823			WD40 domain protein	blastp_trinity:DAW1_CHLRE|81.6;	pfam:DAW1_CHLRE|81.6;	2
SteCoe_29863			TTL domain protein	blastp_trinity:TTL6A_TETTS|521;	pfam:TTL6A_TETTS|521;	2
SteCoe_29869			LRR_9 domain protein	blastp_trinity:LRIQ3_MOUSE|79.0;	pfam:LRIQ3_MOUSE|79.0;	2
SteCoe_29890			hypothetical protein	blastp_trinity:NA	pfam:	2
SteCoe_29999			hypothetical protein	blastp_trinity:NA	pfam:	2
SteCoe_30039			Ras domain protein			2
SteCoe_30089			Ank_2 domain protein			2
SteCoe_30232			UCH domain protein	blastp_trinity:UBP12_ARATH|337;	pfam:UBP12_ARATH|337;	2
SteCoe_30288			Cupin_8 domain protein	blastp_trinity:JMJ30_ARATH|65.9;	pfam:JMJ30_ARATH|65.9;	2
SteCoe_303			MORN domain protein	blastp_trinity:PI5K4_ARATH|58.9;	pfam:PI5K4_ARATH|58.9;	2
SteCoe_30317			DYRK family kinase			2
SteCoe_30330			hypothetical protein	blastp_trinity:NA	pfam:	2
SteCoe_30340			pseudokinase domain containing protein	blastp_trinity:IF2_PSEHT|62.4;	pfam:IF2_PSEHT|62.4;	2
SteCoe_30378			EF-hand_7 domain protein	blastp_trinity:NA	pfam:	2
SteCoe_30497			MORN domain protein			2
SteCoe_30518			hypothetical protein	blastp_trinity:NA	pfam:	2
SteCoe_30637			Sina domain protein	blastp_trinity:SINAL_DROME|70.5;	pfam:SINAL_DROME|70.5;	2
SteCoe_30645			cNMP_binding domain protein	blastp_trinity:KAPR_BLAEM|235;	pfam:KAPR_BLAEM|235;	2
SteCoe_30688			hypothetical protein			2
SteCoe_3069			RCC1 domain protein	blastp_trinity:UVR8_ARATH|85.9;	pfam:UVR8_ARATH|85.9;	2
SteCoe_30740			hypothetical protein			2
SteCoe_3082			hypothetical protein	blastp_trinity:NA	pfam:	2
SteCoe_30846			IBN_N domain protein	blastp_trinity:IMB1_ARATH|273;	pfam:IMB1_ARATH|273;	2
SteCoe_30901			RINGv domain protein			2
SteCoe_3092			hypothetical protein	blastp_trinity:NA	pfam:	2
SteCoe_31008			MORN domain protein	blastp_trinity:PI5K2_ARATH|84.7;	pfam:PI5K2_ARATH|84.7;	2
SteCoe_31023			RCK family kinase	blastp_trinity:MAK_MOUSE|334;	pfam:MAK_MOUSE|334;	2
SteCoe_31029			hypothetical protein	blastp_trinity:NA	pfam:	2
SteCoe_31126			hypothetical protein	blastp_trinity:NA	pfam:	2
SteCoe_31246		IDA7 intermediate chain	hypothetical protein	blastp_trinity:WDR63_HUMAN|122;	pfam:WDR63_HUMAN|122;	2
SteCoe_3134			MORN domain protein	blastp_trinity:PI5K4_ARATH|82.4;	pfam:PI5K4_ARATH|82.4;	2
SteCoe_31556			hypothetical protein	blastp_trinity:NA	pfam:	2
SteCoe_31578			hypothetical protein			2
SteCoe_31615			TTL domain protein			2
SteCoe_31656			hypothetical protein	blastp_trinity:NA	pfam:	2
SteCoe_31791			Aurora family kinase	blastp_trinity:ARK1_SCHPO|221;	pfam:ARK1_SCHPO|221;	2
SteCoe_31828			GBP domain protein	blastp_trinity:GBP1_CHLAE|254;	pfam:GBP1_CHLAE|254;	2
SteCoe_31862			hypothetical protein	blastp_trinity:NA	pfam:	2
SteCoe_31894			hypothetical protein			2
SteCoe_31899			Hydrolase_4 domain protein	blastp_trinity:YQKD_BACSU|89.0;	pfam:YQKD_BACSU|89.0;	2
SteCoe_31912			hypothetical protein			2
SteCoe_31923			hypothetical protein			2
SteCoe_31950			Kelch_1 domain protein	blastp_trinity:KLHL4_HUMAN|58.5;	pfam:KLHL4_HUMAN|58.5;	2
SteCoe_31992		FAM161	UPF0564 domain protein	blastp_trinity:F161A_HUMAN|73.2;	pfam:F161A_HUMAN|73.2;	2
SteCoe_32128			hypothetical protein			2
SteCoe_32146			AMPK subfamily kinase	blastp_trinity:KIN11_ARATH|232;	pfam:KIN11_ARATH|232;	2
SteCoe_32152			hypothetical protein	blastp_trinity:NA	pfam:	2
SteCoe_32168			DYRK family kinase	blastp_trinity:DYRK2_CHICK|306;	pfam:DYRK2_CHICK|306;	2
SteCoe_32170	high	CEP164	WW domain protein	blastp_trinity:CE164_MOUSE|114;	pfam:CE164_MOUSE|114;	2
SteCoe_32189			hypothetical protein	blastp_trinity:NA	pfam:	2
SteCoe_32210			hypothetical protein	blastp_trinity:PP4R1_HUMAN|53.9;	pfam:PP4R1_HUMAN|53.9;	2
SteCoe_32278			hypothetical protein	blastp_trinity:NA	pfam:	2
SteCoe_32295			PB1 domain protein	blastp_trinity:NBR1_ARATH|72.0;	pfam:NBR1_ARATH|72.0;	2
SteCoe_32543			hypothetical protein			2
SteCoe_32559		OFD1	hypothetical protein	blastp_trinity:OFD1_DANRE|70.9;	pfam:OFD1_DANRE|70.9;	2
SteCoe_32595			hypothetical protein			2
SteCoe_32600			hypothetical protein			2
SteCoe_32663			hypothetical protein	blastp_trinity:POB3_ASHGO|266;	pfam:POB3_ASHGO|266;	2
SteCoe_32739			hypothetical protein	blastp_trinity:P4KG6_ARATH|50.1;	pfam:P4KG6_ARATH|50.1;	2
SteCoe_32759			hypothetical protein			2
SteCoe_32764			hypothetical protein	blastp_trinity:NA	pfam:	2
SteCoe_32813			hypothetical protein	blastp_trinity:NA	pfam:	2
SteCoe_32965			hypothetical protein	blastp_trinity:NA	pfam:	2
SteCoe_32973			hypothetical protein	blastp_trinity:CAC1M_MUSDO|588;	pfam:CAC1M_MUSDO|588;	2
SteCoe_3305	high		hypothetical protein	blastp_trinity:NA	pfam:	2
SteCoe_33408		POC1	hypothetical protein	blastp_trinity:POC1A_MOUSE|287;	pfam:POC1A_MOUSE|287;	2
SteCoe_33475			hypothetical protein	blastp_trinity:IPO5_MOUSE|106;	pfam:IPO5_MOUSE|106;	2
SteCoe_33509			CAMKK family kinase	blastp_trinity:Y0010_DICDI|136;	pfam:Y0010_DICDI|136;	2
SteCoe_33512			hypothetical protein	blastp_trinity:CC067_MOUSE|147;	pfam:CC067_MOUSE|147;	2
SteCoe_33533			RSK family kinase	blastp_trinity:PK2_DICDI|291;	pfam:PK2_DICDI|291;	2
SteCoe_33558			hypothetical protein	blastp_trinity:FRAS1_MOUSE|62.4;	pfam:FRAS1_MOUSE|62.4;	2
SteCoe_33581		WD40 domain	hypothetical protein	blastp_trinity:WDR90_MOUSE|101;	pfam:WDR90_MOUSE|101;	2
SteCoe_33604			hypothetical protein	blastp_trinity:TLDC2_HUMAN|112;	pfam:TLDC2_HUMAN|112;	2
SteCoe_33606			hypothetical protein	blastp_trinity:PP2C2_CAEEL|134;	pfam:PP2C2_CAEEL|134;	2
SteCoe_33607			hypothetical protein	blastp_trinity:HERC1_HUMAN|85.1;	pfam:HERC1_HUMAN|85.1;	2
SteCoe_3377			ATP_bind_1 domain protein	blastp_trinity:GPN1_HUMAN|280;	pfam:GPN1_HUMAN|280;	2
SteCoe_33808			hypothetical protein	blastp_trinity:CBPO_HUMAN|65.9;	pfam:CBPO_HUMAN|65.9;	2
SteCoe_34069			hypothetical protein	blastp_trinity:NA	pfam:	2
SteCoe_34173			hypothetical protein	blastp_trinity:DAAF5_HUMAN|92.8;	pfam:DAAF5_HUMAN|92.8;	2
SteCoe_34179			hypothetical protein	blastp_trinity:NA	pfam:	2
SteCoe_34261			hypothetical protein	blastp_trinity:NA	pfam:	2
SteCoe_34271			hypothetical protein	blastp_trinity:MSH2_MOUSE|311;	pfam:MSH2_MOUSE|311;	2
SteCoe_34359			hypothetical protein			2
SteCoe_34483			hypothetical protein			2
SteCoe_34485			Aurora family kinase	blastp_trinity:AURKA_HUMAN|216;	pfam:AURKA_HUMAN|216;	2
SteCoe_34559			hypothetical protein	blastp_trinity:IF4G1_MOUSE|127;	pfam:IF4G1_MOUSE|127;	2
SteCoe_34563			PIKK-related kinase	blastp_trinity:ATR_ORYSJ|202;	pfam:ATR_ORYSJ|202;	2
SteCoe_34584			hypothetical protein	blastp_trinity:NA	pfam:	2
SteCoe_34702			hypothetical protein	blastp_trinity:NA	pfam:	2
SteCoe_3480	high		AMPK subfamily kinase	blastp_trinity:KIN10_ARATH|323;	pfam:KIN10_ARATH|323;	2
SteCoe_34947			hypothetical protein			2
SteCoe_34960			hypothetical protein	blastp_trinity:ATG2_EMENI|79.3;	pfam:ATG2_EMENI|79.3;	2
SteCoe_35003			hypothetical protein			2
SteCoe_35198			hypothetical protein	blastp_trinity:NA	pfam:	2
SteCoe_35306			hypothetical protein			2
SteCoe_3535			hypothetical protein	blastp_trinity:MSPS_DROME|72.4;	pfam:MSPS_DROME|72.4;	2
SteCoe_35385			hypothetical protein	blastp_trinity:NA	pfam:	2
SteCoe_35408		OFD1	hypothetical protein	blastp_trinity:OFD1_DANRE|98.2;	pfam:OFD1_DANRE|98.2;	2
SteCoe_35486			hypothetical protein	blastp_trinity:HERC1_HUMAN|62.0;	pfam:HERC1_HUMAN|62.0;	2
SteCoe_35572			hypothetical protein			2
SteCoe_3561			hypothetical protein			2
SteCoe_35705			hypothetical protein	blastp_trinity:RBG1L_PONAB|130;	pfam:RBG1L_PONAB|130;	2
SteCoe_35765			hypothetical protein	blastp_trinity:NA	pfam:	2
SteCoe_35872			hypothetical protein	blastp_trinity:NA	pfam:	2
SteCoe_35910			hypothetical protein	blastp_trinity:NA	pfam:	2
SteCoe_3598			RabGAP-TBC domain protein	blastp_trinity:GYP5_YEAST|105;	pfam:GYP5_YEAST|105;	2
SteCoe_36018			hypothetical protein			2
SteCoe_36039			hypothetical protein	blastp_trinity:NA	pfam:	2
SteCoe_36069			predicted pseudokinase related to STE kinases	blastp_trinity:Y3184_DICDI|103;	pfam:Y3184_DICDI|103;	2
SteCoe_36092			hypothetical protein	blastp_trinity:NA	pfam:	2
SteCoe_3625			zf-DHHC domain protein	blastp_trinity:ZDH20_ARATH|130;	pfam:ZDH20_ARATH|130;	2
SteCoe_36341			hypothetical protein	blastp_trinity:MCE1_SCHPO|133;	pfam:MCE1_SCHPO|133;	2
SteCoe_36400			hypothetical protein			2
SteCoe_36427			hypothetical protein			2
SteCoe_36445			PLK family kinase	blastp_trinity:CCR1_MAIZE|553;	pfam:CCR1_MAIZE|553;	2
SteCoe_36513			hypothetical protein	blastp_trinity:NA	pfam:	2
SteCoe_36544			RRM_1 domain protein	blastp_trinity:PTBP3_ARATH|151;	pfam:PTBP3_ARATH|151;	2
SteCoe_36555			hypothetical protein	blastp_trinity:PD5BB_XENLA|89.7;	pfam:PD5BB_XENLA|89.7;	2
SteCoe_36675			hypothetical protein			2
SteCoe_36822		POC1	WD40 domain protein	blastp_trinity:POC1A_BOVIN|264;	pfam:POC1A_BOVIN|264;	2
SteCoe_36864			NEK family kinase			2
SteCoe_3688			hypothetical protein			2
SteCoe_36924			hypothetical protein	blastp_trinity:NA	pfam:	2
SteCoe_36931			Ephrin_rec_like domain protein	blastp_trinity:SVEP1_RAT|53.1;	pfam:SVEP1_RAT|53.1;	2
SteCoe_36939			RCK family kinase	blastp_trinity:MAK_HUMAN|363;	pfam:MAK_HUMAN|363;	2
SteCoe_36963			zf-RING_2 domain protein	blastp_trinity:PHRF1_HUMAN|77.8;	pfam:PHRF1_HUMAN|77.8;	2
SteCoe_36982			MIF4G domain protein	blastp_trinity:IF4G_WHEAT|132;	pfam:IF4G_WHEAT|132;	2
SteCoe_37086			hypothetical protein	blastp_trinity:NA	pfam:	2
SteCoe_37089			hypothetical protein	blastp_trinity:NA	pfam:	2
SteCoe_37106			XLF domain protein	blastp_trinity:NA	pfam:	2
SteCoe_37196			MFS_1 domain protein	blastp_trinity:S22AF_XENLA|79.7;	pfam:S22AF_XENLA|79.7;	2
SteCoe_3723			hypothetical protein	blastp_trinity:CING_XENTR|92.0;	pfam:CING_XENTR|92.0;	2
SteCoe_37294			MORN domain protein			2
SteCoe_37621			Kinesin domain protein	blastp_trinity:KN12F_ORYSJ|77.0;	pfam:KN12F_ORYSJ|77.0;	2
SteCoe_37683			hypothetical protein			2
SteCoe_377			LRR_9 domain protein	blastp_trinity:LRIQ3_MOUSE|77.8;	pfam:LRIQ3_MOUSE|77.8;	2
SteCoe_37712			hypothetical protein	blastp_trinity:NA	pfam:	2
SteCoe_37747			hypothetical protein			2
SteCoe_37781			VIT domain protein			2
SteCoe_37817			hypothetical protein	blastp_trinity:CATR5_PARTE|67.8;	pfam:CATR5_PARTE|67.8;	2
SteCoe_37836		ODA1 dynein docking complex	hypothetical protein	blastp_trinity:ODA1_CHLRE|262;	pfam:ODA1_CHLRE|262;	2
SteCoe_37855			hypothetical protein	blastp_trinity:NA	pfam:	2
SteCoe_38069			hypothetical protein			2
SteCoe_38137			Kinesin domain protein	blastp_trinity:KINH_SYNRA|68.9;	pfam:KINH_SYNRA|68.9;	2
SteCoe_38173			TK domain protein	blastp_trinity:KITH_DICDI|191;	pfam:KITH_DICDI|191;	2
SteCoe_3825			hypothetical protein			2
SteCoe_38252			TPR_8 domain protein	blastp_trinity:TTC6_HUMAN|54.3;	pfam:TTC6_HUMAN|54.3;	2
SteCoe_3831			hypothetical protein			2
SteCoe_3850			zf-B_box domain protein	blastp_trinity:NA	pfam:	2
SteCoe_3856		PF20 central pair protein	WD40 domain protein	blastp_trinity:PF20_CHLRE|524;	pfam:PF20_CHLRE|524;	2
SteCoe_3873			Peptidase_M14 domain protein	blastp_trinity:CBPC2_XENTR|442;	pfam:CBPC2_XENTR|442;	2
SteCoe_39019			hypothetical protein			2
SteCoe_3949			SH3_2 domain protein	blastp_trinity:NA	pfam:	2
SteCoe_4259			SAM_1 domain protein	blastp_trinity:NA	pfam:	2
SteCoe_4298			BRCT domain protein	blastp_trinity:RFC1_MOUSE|65.9;	pfam:RFC1_MOUSE|65.9;	2
SteCoe_4299			hypothetical protein	blastp_trinity:NA	pfam:	2
SteCoe_4306			DCB domain protein	blastp_trinity:BIG2_HUMAN|663;	pfam:BIG2_HUMAN|663;	2
SteCoe_4393			hypothetical protein	blastp_trinity:NA	pfam:	2
SteCoe_4442			AAA domain protein	blastp_trinity:RFC2_RAT|382;	pfam:RFC2_RAT|382;	2
SteCoe_4458			hypothetical protein			2
SteCoe_4481			STAG domain protein	blastp_trinity:STAG2_HUMAN|99.8;	pfam:STAG2_HUMAN|99.8;	2
SteCoe_4543			EF-hand_8 domain protein	blastp_trinity:NCS1_PONAB|50.4;	pfam:NCS1_PONAB|50.4;	2
SteCoe_4550			hypothetical protein			2
SteCoe_4694			hypothetical protein	blastp_trinity:NA	pfam:	2
SteCoe_4721			CCDC66 domain protein	blastp_trinity:NA	pfam:	2
SteCoe_4725			Arm_3 domain protein	blastp_trinity:IMA2_SCHPO|115;	pfam:IMA2_SCHPO|115;	2
SteCoe_4749			SCO1-SenC domain protein			2
SteCoe_4766			hypothetical protein			2
SteCoe_483			hypothetical protein			2
SteCoe_4833		Dynein heavy chain	DHC_N1 domain protein	blastp_trinity:DYHC2_TRIGR|3539;	pfam:DYHC2_TRIGR|3539;	2
SteCoe_4851			DnaJ domain protein			2
SteCoe_4923			IQ domain protein	blastp_trinity:NA	pfam:	2
SteCoe_4946			hypothetical protein	blastp_trinity:NA	pfam:	2
SteCoe_4981			zf-C3HC4_2 domain protein			2
SteCoe_4982			hypothetical protein	blastp_trinity:NA	pfam:	2
SteCoe_4996			hypothetical protein			2
SteCoe_5048	high		hypothetical protein	blastp_trinity:R1A_CVHN1|79.3;	pfam:NA	2
SteCoe_5068			hypothetical protein			2
SteCoe_5080			hypothetical protein			2
SteCoe_5107			LRR_6 domain protein	blastp_trinity:LR74A_HUMAN|57.4;	pfam:LR74A_HUMAN|57.4;	2
SteCoe_5156			TTL domain protein	blastp_trinity:TTL3A_TETTS|191;	pfam:TTL3A_TETTS|191;	2
SteCoe_5230			CMGC related kinase	blastp_trinity:GSK3_CAEBR|183;	pfam:GSK3_CAEBR|183;	2
SteCoe_5275			Actin domain protein			2
SteCoe_5286			MST subfamily kinase	blastp_trinity:STK4_SQUAC|354;	pfam:STK4_SQUAC|354;	2
SteCoe_5323			EI24 domain protein			2
SteCoe_5504			hypothetical protein	blastp_trinity:PCSK5_HUMAN|129;	pfam:PCSK5_HUMAN|129;	2
SteCoe_5550			predicted pseudokinase related to AGC kinases	blastp_trinity:KAPCB_HUMAN|162;	pfam:KAPCB_HUMAN|162;	2
SteCoe_5556			Myb_DNA-binding domain protein	blastp_trinity:MYBA_HUMAN|60.1;	pfam:MYBA_HUMAN|60.1;	2
SteCoe_5584			hypothetical protein			2
SteCoe_5599			Striatin domain protein	blastp_trinity:STRN_DICDI|65.5;	pfam:STRN_DICDI|65.5;	2
SteCoe_5697			Kinesin domain protein	blastp_trinity:KINUB_ORYSJ|289;	pfam:KINUB_ORYSJ|289;	2
SteCoe_5699			GSK family kinase	blastp_trinity:KSG5_ARATH|488;	pfam:KSG5_ARATH|488;	2
SteCoe_5702			TTL domain protein	blastp_trinity:TTL6A_TETTS|384;	pfam:TTL6A_TETTS|384;	2
SteCoe_574			F-box domain protein	blastp_trinity:NA	pfam:	2
SteCoe_5765			hypothetical protein			2
SteCoe_5766			Hydrolase_4 domain protein	blastp_trinity:YQKD_BACSU|96.7;	pfam:YQKD_BACSU|96.7;	2
SteCoe_5956			hypothetical protein			2
SteCoe_6049			Exo_endo_phos domain protein	blastp_trinity:INP5E_PANTR|140;	pfam:INP5E_PANTR|140;	2
SteCoe_6058			hypothetical protein	blastp_trinity:NA	pfam:	2
SteCoe_6078			ALMS_motif domain protein	blastp_trinity:NA	pfam:	2
SteCoe_610			hypothetical protein	blastp_trinity:NA	pfam:	2
SteCoe_6111			hypothetical protein	blastp_trinity:NA	pfam:	2
SteCoe_6114			DUF4497 domain protein	blastp_trinity:NA	pfam:	2
SteCoe_6316			DUF4524 domain protein	blastp_trinity:NA	pfam:	2
SteCoe_6318			PaaSYMP domain protein			2
SteCoe_6344			hypothetical protein	blastp_trinity:NA	pfam:	2
SteCoe_6364			hypothetical protein			2
SteCoe_6417			hypothetical protein	blastp_trinity:NA	pfam:	2
SteCoe_6469			hypothetical protein	blastp_trinity:NA	pfam:	2
SteCoe_650			hypothetical protein			2
SteCoe_6515			WD40 domain protein	blastp_trinity:YY46_NOSS1|65.1;	pfam:YY46_NOSS1|65.1;	2
SteCoe_6522			ABC_membrane domain protein			2
SteCoe_6552			p25-alpha domain protein	blastp_trinity:NA	pfam:	2
SteCoe_6687			hypothetical protein			2
SteCoe_6735			hypothetical protein	blastp_trinity:NA	pfam:	2
SteCoe_6879			uDENN domain protein			2
SteCoe_6994			DOMON domain protein	blastp_trinity:NA	pfam:	2
SteCoe_7061			Arrestin_N domain protein			2
SteCoe_7068			AAA domain protein			2
SteCoe_7114			Myb_DNA-binding domain protein	blastp_trinity:MYB_XENLA|60.5;	pfam:MYB_XENLA|60.5;	2
SteCoe_7125			hypothetical protein	blastp_trinity:NA	pfam:	2
SteCoe_7126			Kinesin domain protein	blastp_trinity:KN12A_ARATH|129;	pfam:KN12A_ARATH|129;	2
SteCoe_7357			Kinesin domain protein	blastp_trinity:KINH_SYNRA|70.9;	pfam:KINH_SYNRA|70.9;	2
SteCoe_7379			NOT2_3_5 domain protein			2
SteCoe_7427			hypothetical protein			2
SteCoe_7433			Ax_dynein_light domain protein	blastp_trinity:NA	pfam:	2
SteCoe_7473			hypothetical protein	blastp_trinity:NA	pfam:	2
SteCoe_7537			PP2C domain protein	blastp_trinity:P2C72_ARATH|90.1;	pfam:P2C72_ARATH|90.1;	2
SteCoe_7545			PHD domain protein	blastp_trinity:JADE1_DANRE|112;	pfam:JADE1_DANRE|112;	2
SteCoe_763			hypothetical protein			2
SteCoe_7632			PhoPQ_related domain protein			2
SteCoe_7657			MORN domain protein	blastp_trinity:PI5K8_ARATH|58.5;	pfam:PI5K8_ARATH|58.5;	2
SteCoe_7677			ABC1 family kinase	blastp_trinity:ADCK1_MOUSE|271;	pfam:ADCK1_MOUSE|271;	2
SteCoe_7767			Alba domain protein	blastp_trinity:NA	pfam:	2
SteCoe_7908			hypothetical protein	blastp_trinity:NA	pfam:	2
SteCoe_7973			MFS_1 domain protein			2
SteCoe_7978			DNA_pol_A_exo1 domain protein	blastp_trinity:MUT7_HUMAN|86.7;	pfam:MUT7_HUMAN|86.7;	2
SteCoe_7986			hypothetical protein	blastp_trinity:NA	pfam:	2
SteCoe_8030			Kinesin domain protein	blastp_trinity:KN7L_ARATH|327;	pfam:KN7L_ARATH|327;	2
SteCoe_8058			hypothetical protein			2
SteCoe_8152			hypothetical protein	blastp_trinity:NA	pfam:	2
SteCoe_8213			hypothetical protein	blastp_trinity:NA	pfam:	2
SteCoe_8218			Histone domain protein			2
SteCoe_8222			hypothetical protein			2
SteCoe_824			hypothetical protein			2
SteCoe_8290			CDPK family kinase	blastp_trinity:CDPK1_PLAFK|357;	pfam:CDPK1_PLAFK|357;	2
SteCoe_8298			hypothetical protein			2
SteCoe_8396			hypothetical protein			2
SteCoe_8421			hypothetical protein			2
SteCoe_8445			hypothetical protein			2
SteCoe_8448			hypothetical protein	blastp_trinity:NA	pfam:	2
SteCoe_8493			hypothetical protein			2
SteCoe_8556			hypothetical protein	blastp_trinity:NA	pfam:	2
SteCoe_8591			C2 domain protein			2
SteCoe_8600			ULK family kinase	blastp_trinity:RUK_ARATH|149;	pfam:RUK_ARATH|149;	2
SteCoe_8628			CK1 kinase	blastp_trinity:KC1_TOXGO|445;	pfam:KC1_TOXGO|445;	2
SteCoe_8652			MCM_OB domain protein	blastp_trinity:MCM9_ORYSI|325;	pfam:MCM9_ORYSI|325;	2
SteCoe_8673			hypothetical protein			2
SteCoe_8731			hypothetical protein	blastp_trinity:NA	pfam:	2
SteCoe_8755			hypothetical protein	blastp_trinity:NA	pfam:	2
SteCoe_8765			Peptidase_C2 domain protein	blastp_trinity:CAND_DROME|234;	pfam:CAND_DROME|234;	2
SteCoe_8856			hypothetical protein	blastp_trinity:NA	pfam:	2
SteCoe_8869			ADH_N domain protein			2
SteCoe_8930			NTP_transf_2 domain protein	blastp_trinity:PAPD5_HUMAN|101;	pfam:PAPD5_HUMAN|101;	2
SteCoe_8944			hypothetical protein			2
SteCoe_896			hypothetical protein			2
SteCoe_8996			IQ domain protein			2
SteCoe_8997			hypothetical protein	blastp_trinity:NA	pfam:	2
SteCoe_9057			hypothetical protein	blastp_trinity:NA	pfam:	2
SteCoe_9116			TPR_8 domain protein	blastp_trinity:NA	pfam:	2
SteCoe_9137			zf-RING_UBOX domain protein	blastp_trinity:PI5K2_ARATH|63.9;	pfam:PI5K2_ARATH|63.9;	2
SteCoe_9175			ARL2_Bind_BART domain protein	blastp_trinity:CFA36_DANRE|112;	pfam:CFA36_DANRE|112;	2
SteCoe_9348			TCR domain protein	blastp_trinity:TCX6_ARATH|152;	pfam:TCX6_ARATH|152;	2
SteCoe_9382			Acyltransferase domain protein			2
SteCoe_943			WD40 domain protein	blastp_trinity:YY46_NOSS1|63.5;	pfam:YY46_NOSS1|63.5;	2
SteCoe_9511			DEAD domain protein	blastp_trinity:MED34_ARATH|192;	pfam:MED34_ARATH|192;	2
SteCoe_9540			DUF1619 domain protein	blastp_trinity:TECT3_MOUSE|83.2;	pfam:TECT3_MOUSE|83.2;	2
SteCoe_9592			hypothetical protein	blastp_trinity:FCHO1_DANRE|52.8;	pfam:FCHO1_DANRE|52.8;	2
SteCoe_9602			hypothetical protein			2
SteCoe_9604			RCC1_2 domain protein	blastp_trinity:HERC1_HUMAN|69.7;	pfam:HERC1_HUMAN|69.7;	2
SteCoe_964		CEP131/AZI	hypothetical protein	blastp_trinity:CP131_MOUSE|98.6;	pfam:CP131_MOUSE|98.6;	2
SteCoe_9650			hypothetical protein	blastp_trinity:NA	pfam:	2
SteCoe_975			NEK family kinase	blastp_trinity:NEKL3_CAEEL|172;	pfam:NEKL3_CAEEL|172;	2
SteCoe_9925			IQ domain protein	blastp_trinity:NA	pfam:	2
SteCoe_9950			RINGv domain protein	blastp_trinity:MARH7_PONAB|60.8;	pfam:MARH7_PONAB|60.8;	2
SteCoe_10081			DUF667 domain protein	blastp_trinity:CFA20_PARTE|375;	pfam:CFA20_PARTE|375;	3
SteCoe_10160			Kinesin domain protein	blastp_trinity:KN7N_ARATH|253;	pfam:KN7N_ARATH|253;	3
SteCoe_10162			hypothetical protein			3
SteCoe_10164			SMC_N domain protein	blastp_trinity:SMC4_XENLA|601;	pfam:SMC4_XENLA|601;	3
SteCoe_102			hypothetical protein	blastp_trinity:NA	pfam:	3
SteCoe_1022		ODA6 dynein intermediate chain	hypothetical protein	blastp_trinity:DYI3_CHLRE|442;	pfam:DYI3_CHLRE|442;	3
SteCoe_10229			hypothetical protein			3
SteCoe_10298			ERCC4 domain protein			3
SteCoe_10300			PDEase_I domain protein			3
SteCoe_10312			TTL domain protein	blastp_trinity:TTL_BOVIN|155;	pfam:TTL_BOVIN|155;	3
SteCoe_10343			DEAD domain protein			3
SteCoe_10359			hypothetical protein	blastp_trinity:NA	pfam:	3
SteCoe_10372			pseudokinase domain containing protein	blastp_trinity:CDPK9_ARATH|56.2;	pfam:CDPK9_ARATH|56.2;	3
SteCoe_10431			hypothetical protein	blastp_trinity:NA	pfam:	3
SteCoe_10502			hypothetical protein			3
SteCoe_10533			hypothetical protein			3
SteCoe_10645			LRR_6 domain protein	blastp_trinity:NLRC5_MOUSE|76.3;	pfam:NLRC5_MOUSE|76.3;	3
SteCoe_1067			hypothetical protein	blastp_trinity:RINI_MOUSE|56.6;	pfam:RINI_MOUSE|56.6;	3
SteCoe_10706			hypothetical protein			3
SteCoe_10840			hypothetical protein			3
SteCoe_10854		RSP1	MORN domain protein	blastp_trinity:RSP1_CHLRE|59.7;	pfam:RSP1_CHLRE|59.7;	3
SteCoe_10926			CRAL_TRIO domain protein	blastp_trinity:YJX4_SCHPO|78.6;	pfam:YJX4_SCHPO|78.6;	3
SteCoe_10978			hypothetical protein			3
SteCoe_10987			hypothetical protein	blastp_trinity:NA	pfam:	3
SteCoe_11002			hypothetical protein			3
SteCoe_1102		IFT80	WD40 domain protein	blastp_trinity:IFT80_HUMAN|721;	pfam:IFT80_HUMAN|721;	3
SteCoe_11039			hypothetical protein			3
SteCoe_11082			TPR_16 domain protein			3
SteCoe_11091	high		WD40 domain protein	blastp_trinity:YY46_NOSS1|69.3;	pfam:YY46_NOSS1|69.3;	3
SteCoe_11167			DYRK family kinase			3
SteCoe_11210			Thioredoxin domain protein	blastp_trinity:PLP3B_ARATH|141;	pfam:PLP3B_ARATH|141;	3
SteCoe_11226			hypothetical protein			3
SteCoe_11281			AMP-binding domain protein			3
SteCoe_11294			hypothetical protein	blastp_trinity:NA	pfam:	3
SteCoe_11310			hypothetical protein			3
SteCoe_1135			hypothetical protein	blastp_trinity:NA	pfam:	3
SteCoe_1146			Kinesin domain protein	blastp_trinity:KINH_BOTFU|369;	pfam:KINH_BOTFU|369;	3
SteCoe_1147			hypothetical protein			3
SteCoe_1152		ODF3	SHIPPO-rpt domain protein	blastp_trinity:ODF3B_DANRE|53.1;	pfam:ODF3B_DANRE|53.1;	3
SteCoe_11633			Kelch_1 domain protein	blastp_trinity:NA	pfam:	3
SteCoe_11665			IQ domain protein			3
SteCoe_11679		DUF4821 domain protein	DUF4821 domain protein	blastp_trinity:CFA61_TETTS|278;	pfam:CFA61_TETTS|278;	3
SteCoe_11762			hypothetical protein	blastp_trinity:NA	pfam:	3
SteCoe_11786			zf-CCCH domain protein	blastp_trinity:CTH1_YEAST|78.2;	pfam:CTH1_YEAST|78.2;	3
SteCoe_11804			Kinesin domain protein	blastp_trinity:KLP1_CHLRE|495;	pfam:KLP1_CHLRE|495;	3
SteCoe_11857			hypothetical protein	blastp_trinity:NA	pfam:	3
SteCoe_1186			hypothetical protein			3
SteCoe_11872		ef hand 7 domain	EF-hand_7 domain protein	blastp_trinity:CAPSL_MOUSE|113;	pfam:CAPSL_MOUSE|113;	3
SteCoe_11881			BTB domain protein	blastp_trinity:NA	pfam:	3
SteCoe_11882			hypothetical protein	blastp_trinity:NA	pfam:	3
SteCoe_11894			HMG_box_2 domain protein	blastp_trinity:NA	pfam:	3
SteCoe_11932		FAP100	DUF4200 domain protein	blastp_trinity:CP100_CHLRE|90.1;	pfam:CP100_CHLRE|90.1;	3
SteCoe_11938			hypothetical protein	blastp_trinity:NA	pfam:	3
SteCoe_11939			hypothetical protein	blastp_trinity:NA	pfam:	3
SteCoe_11984		SHIPPO-rpt domain protein	SHIPPO-rpt domain protein	blastp_trinity:ODF3B_DANRE|53.5;	pfam:ODF3B_DANRE|53.5;	3
SteCoe_1199			hypothetical protein	blastp_trinity:NA	pfam:	3
SteCoe_11999			Aldedh domain protein			3
SteCoe_12027			hypothetical protein	blastp_trinity:NA	pfam:	3
SteCoe_12083			hypothetical protein	blastp_trinity:NA	pfam:	3
SteCoe_12084			TTL domain protein	blastp_trinity:TTLL1_TETTS|541;	pfam:TTLL1_TETTS|541;	3
SteCoe_12151		FAP54	DUF4486 domain protein	blastp_trinity:CFA54_MOUSE|60.8;	pfam:CFA54_MOUSE|60.8;	3
SteCoe_12160			VWA_2 domain protein	blastp_trinity:PSMD4_ARATH|246;	pfam:PSMD4_ARATH|246;	3
SteCoe_12277		DRC1	NYD-SP28 domain protein	blastp_trinity:DRC1_CHLRE|308;	pfam:DRC1_CHLRE|308;	3
SteCoe_12296			Myb_DNA-binding domain protein			3
SteCoe_1232			TPR_8 domain protein	blastp_trinity:SEC_ARATH|64.7;	pfam:SEC_ARATH|64.7;	3
SteCoe_12335			Ank_2 domain protein	blastp_trinity:SECG_DICDI|55.5;	pfam:SECG_DICDI|55.5;	3
SteCoe_12380		DRC3 dynein regulatory complex protein	LRR_9 domain protein	blastp_trinity:DRC3_CHLRE|79.7;	pfam:DRC3_CHLRE|79.7;	3
SteCoe_12445			ANAPC3 domain protein	blastp_trinity:Y1345_METJA|53.5;	pfam:Y1345_METJA|53.5;	3
SteCoe_12446			ANAPC3 domain protein	blastp_trinity:NA	pfam:	3
SteCoe_12452			PAZ domain protein	blastp_trinity:PIWL1_CHICK|333;	pfam:PIWL1_CHICK|333;	3
SteCoe_12492			CLASP_N domain protein	blastp_trinity:CLAP1_XENTR|69.7;	pfam:CLAP1_XENTR|69.7;	3
SteCoe_12542			hypothetical protein	blastp_trinity:NA	pfam:	3
SteCoe_12555		Rib43a	RIB43A domain protein	blastp_trinity:RIBC2_HUMAN|71.6;	pfam:RIBC2_HUMAN|71.6;	3
SteCoe_1257			hypothetical protein	blastp_trinity:NA	pfam:	3
SteCoe_126			Ank_2 domain protein	blastp_trinity:PSD10_HUMAN|90.9;	pfam:PSD10_HUMAN|90.9;	3
SteCoe_12618			hypothetical protein	blastp_trinity:NA	pfam:	3
SteCoe_1262		Dynein heavy chain	hypothetical protein	blastp_trinity:DYH1A_CHLRE|53.9;	pfam:DYH1A_CHLRE|53.9;	3
SteCoe_12627			HEAT_2 domain protein	blastp_trinity:NA	pfam:	3
SteCoe_12650			HEAT_2 domain protein	blastp_trinity:NA	pfam:	3
SteCoe_12675			hypothetical protein			3
SteCoe_12694			TTL domain protein			3
SteCoe_12698			hypothetical protein	blastp_trinity:NA	pfam:	3
SteCoe_12763			DUF4378 domain protein	blastp_trinity:NA	pfam:	3
SteCoe_12824			hypothetical protein	blastp_trinity:NA	pfam:	3
SteCoe_12862			DYRK family kinase			3
SteCoe_12921		BOP5/inner arm IC	WD40 domain protein	blastp_trinity:WDR78_RAT|305;	pfam:WDR78_RAT|305;	3
SteCoe_12970			DUF229 domain protein			3
SteCoe_13022			Kinesin domain protein	blastp_trinity:KIF2A_PONAB|363;	pfam:KIF2A_PONAB|363;	3
SteCoe_13054			hypothetical protein	blastp_trinity:NA	pfam:	3
SteCoe_13073			hypothetical protein			3
SteCoe_13135			CDK family kinase			3
SteCoe_13255			Med26 domain protein	blastp_trinity:IWS1_HUMAN|111;	pfam:IWS1_HUMAN|111;	3
SteCoe_13263			NtCtMGAM_N domain protein			3
SteCoe_1333			hypothetical protein	blastp_trinity:NA	pfam:	3
SteCoe_13340			hypothetical protein	blastp_trinity:NA	pfam:	3
SteCoe_13390			PPR domain protein	blastp_trinity:RF1_ORYSI|116;	pfam:RF1_ORYSI|116;	3
SteCoe_13400			hypothetical protein	blastp_trinity:NA	pfam:	3
SteCoe_13414			TKL related kinase			3
SteCoe_1342			UQ_con domain protein			3
SteCoe_13449			Ras domain protein	blastp_trinity:YPTC4_CHLRE|189;	pfam:YPTC4_CHLRE|189;	3
SteCoe_13473			pseudokinase domain containing protein	blastp_trinity:NLRC3_HUMAN|55.8;	pfam:NLRC3_HUMAN|55.8;	3
SteCoe_13490			hypothetical protein	blastp_trinity:NA	pfam:	3
SteCoe_13510			hypothetical protein			3
SteCoe_13535			hypothetical protein	blastp_trinity:NA	pfam:	3
SteCoe_13566			NEK family kinase	blastp_trinity:NEK2_DICDI|363;	pfam:NEK2_DICDI|363;	3
SteCoe_13606			hypothetical protein	blastp_trinity:NA	pfam:	3
SteCoe_13620			CH_2 domain protein	blastp_trinity:SPAT4_PANTR|88.6;	pfam:SPAT4_PANTR|88.6;	3
SteCoe_13621		dynein heavy chain	DHC_N2 domain protein	blastp_trinity:DYH1_MOUSE|3500;	pfam:DYH1_MOUSE|3500;	3
SteCoe_13642			Kinesin domain protein	blastp_trinity:KN7N_ARATH|265;	pfam:KN7N_ARATH|265;	3
SteCoe_13667			hypothetical protein	blastp_trinity:NA	pfam:	3
SteCoe_13752			ERK subfamily kinase	blastp_trinity:ERK1_DICDI|404;	pfam:ERK1_DICDI|404;	3
SteCoe_1376			hypothetical protein			3
SteCoe_13839			hypothetical protein	blastp_trinity:NA	pfam:	3
SteCoe_13882			hypothetical protein	blastp_trinity:NA	pfam:	3
SteCoe_1390			AAA domain protein			3
SteCoe_13954			hypothetical protein			3
SteCoe_13957			hypothetical protein	blastp_trinity:DAAF5_MOUSE|139;	pfam:DAAF5_MOUSE|139;	3
SteCoe_13976			Ins145_P3_rec domain protein	blastp_trinity:ITPR3_MOUSE|159;	pfam:ITPR3_MOUSE|159;	3
SteCoe_13979			Ion_trans domain protein			3
SteCoe_1411			hypothetical protein			3
SteCoe_14119			IQ domain protein	blastp_trinity:NA	pfam:	3
SteCoe_14193			hypothetical protein			3
SteCoe_14316			hypothetical protein	blastp_trinity:NA	pfam:	3
SteCoe_14335			hypothetical protein	blastp_trinity:YAJE_SCHPO|52.0;	pfam:YAJE_SCHPO|52.0;	3
SteCoe_14353			hypothetical protein	blastp_trinity:NA	pfam:	3
SteCoe_14366			hypothetical protein			3
SteCoe_14420			Kinesin domain protein	blastp_trinity:KIF2A_PONAB|370;	pfam:KIF2A_PONAB|370;	3
SteCoe_14550			TPR_12 domain protein			3
SteCoe_14561			hypothetical protein	blastp_trinity:APC1_HUMAN|422;	pfam:APC1_HUMAN|422;	3
SteCoe_14563			hypothetical protein	blastp_trinity:NA	pfam:	3
SteCoe_14599			hypothetical protein	blastp_trinity:NA	pfam:	3
SteCoe_14603			WD40 domain protein			3
SteCoe_1462	high		DUF4378 domain protein	blastp_trinity:NA	pfam:	3
SteCoe_14810			hypothetical protein	blastp_trinity:NA	pfam:	3
SteCoe_14938			EF-hand_7 domain protein	blastp_trinity:CML20_ARATH|58.9;	pfam:CML20_ARATH|58.9;	3
SteCoe_14957			hypothetical protein			3
SteCoe_15017			Cnd3 domain protein	blastp_trinity:CND3_HUMAN|91.7;	pfam:CND3_HUMAN|91.7;	3
SteCoe_15032			hypothetical protein	blastp_trinity:NA	pfam:	3
SteCoe_15039			Ras domain protein			3
SteCoe_15115			Peptidase_M16_C domain protein	blastp_trinity:PREP_DANRE|337;	pfam:PREP_DANRE|337;	3
SteCoe_15122			hypothetical protein			3
SteCoe_15164		DRC1	NYD-SP28 domain protein	blastp_trinity:DRC1_CHLRE|309;	pfam:DRC1_CHLRE|309;	3
SteCoe_15213			hypothetical protein	blastp_trinity:NA	pfam:	3
SteCoe_15246			PLK family kinase	blastp_trinity:CCR1_MAIZE|142;	pfam:CCR1_MAIZE|142;	3
SteCoe_15251			cNMP_binding domain protein	blastp_trinity:KAPR_DICDI|80.5;	pfam:KAPR_DICDI|80.5;	3
SteCoe_15255			hypothetical protein	blastp_trinity:NA	pfam:	3
SteCoe_15341			Kinesin domain protein			3
SteCoe_1537			hypothetical protein			3
SteCoe_15378			hypothetical protein	blastp_trinity:NA	pfam:	3
SteCoe_1538			hypothetical protein			3
SteCoe_1540		hypothetical protein	hypothetical protein	blastp_trinity:NA	pfam:	3
SteCoe_15403			TTL domain protein	blastp_trinity:TTL6A_TETTS|443;	pfam:TTL6A_TETTS|443;	3
SteCoe_15434		TBC1 DOMAIN FAMILY MEMBER GTPASE-ACTIVATING PROTEIN	RabGAP-TBC domain protein	blastp_trinity:RBG1L_PONAB|133;	pfam:RBG1L_PONAB|133;	3
SteCoe_15474		IFT81	hypothetical protein	blastp_trinity:IFT81_MOUSE|330;	pfam:IFT81_MOUSE|330;	3
SteCoe_15483		Dynein heavy chain	DHC_N2 domain protein	blastp_trinity:DYH7_HUMAN|1871;	pfam:DYH7_HUMAN|1871;	3
SteCoe_15520			hypothetical protein			3
SteCoe_15548			NT-C2 domain protein	blastp_trinity:NA	pfam:	3
SteCoe_15597			hypothetical protein			3
SteCoe_1561			LRR_9 domain protein	blastp_trinity:DAAF1_BOVIN|224;	pfam:DAAF1_BOVIN|224;	3
SteCoe_15650			hypothetical protein			3
SteCoe_15678			Ras domain protein	blastp_trinity:RBL2A_PONAB|216;	pfam:RBL2A_PONAB|216;	3
SteCoe_1572			CAF1 domain protein	blastp_trinity:CNOT7_XENTR|257;	pfam:CNOT7_XENTR|257;	3
SteCoe_15751			EF-hand_7 domain protein	blastp_trinity:CATR_SCHDU|247;	pfam:CATR_SCHDU|247;	3
SteCoe_15787			hypothetical protein			3
SteCoe_15849			hypothetical protein	blastp_trinity:NA	pfam:	3
SteCoe_159			hypothetical protein			3
SteCoe_15910			Cullin domain protein	blastp_trinity:CUL3B_ARATH|493;	pfam:CUL3B_ARATH|493;	3
SteCoe_15917			hypothetical protein	blastp_trinity:NA	pfam:	3
SteCoe_1598			TPR_11 domain protein	blastp_trinity:RPAP3_HUMAN|78.2;	pfam:RPAP3_HUMAN|78.2;	3
SteCoe_16023			hypothetical protein	blastp_trinity:NA	pfam:	3
SteCoe_16060			hypothetical protein			3
SteCoe_16080		FAP94	Casc1_N domain protein	blastp_trinity:CASC1_DANRE|60.5;	pfam:CASC1_DANRE|60.5;	3
SteCoe_16112			hypothetical protein	blastp_trinity:NA	pfam:	3
SteCoe_16127			hypothetical protein	blastp_trinity:NA	pfam:	3
SteCoe_16133			hypothetical protein			3
SteCoe_16163			DENN domain protein	blastp_trinity:MTMR5_HUMAN|73.2;	pfam:MTMR5_HUMAN|73.2;	3
SteCoe_16184			CK1 kinase	blastp_trinity:CKL1_ARATH|395;	pfam:CKL1_ARATH|395;	3
SteCoe_16186			hypothetical protein			3
SteCoe_16205			hypothetical protein	blastp_trinity:NA	pfam:	3
SteCoe_16220			Kinesin domain protein	blastp_trinity:KIF15_STRPU|467;	pfam:KIF15_STRPU|467;	3
SteCoe_16321			hypothetical protein			3
SteCoe_16362			C2 domain protein			3
SteCoe_16410			hypothetical protein	blastp_trinity:NA	pfam:	3
SteCoe_16429		SGL domain protein	SGL domain protein	blastp_trinity:SSL10_ARATH|53.1;	pfam:SSL10_ARATH|53.1;	3
SteCoe_16506			hypothetical protein	blastp_trinity:NA	pfam:	3
SteCoe_16513			hypothetical protein	blastp_trinity:NA	pfam:	3
SteCoe_16544		DRC9	hypothetical protein	blastp_trinity:DRC9_CHLRE|70.9;	pfam:DRC9_CHLRE|70.9;	3
SteCoe_16546			hypothetical protein			3
SteCoe_16577		FAP172	BRE1 domain protein	blastp_trinity:CCD40_MOUSE|302;	pfam:CCD40_MOUSE|302;	3
SteCoe_16658			hypothetical protein	blastp_trinity:NA	pfam:	3
SteCoe_16659			hypothetical protein	blastp_trinity:NA	pfam:	3
SteCoe_16660			hypothetical protein	blastp_trinity:NA	pfam:	3
SteCoe_16709			PapD-like domain protein	blastp_trinity:NA	pfam:	3
SteCoe_16724			hypothetical protein	blastp_trinity:NA	pfam:	3
SteCoe_16739			hypothetical protein			3
SteCoe_16797			DUF913 domain protein			3
SteCoe_16805			hypothetical protein			3
SteCoe_16871			hypothetical protein	blastp_trinity:NA	pfam:	3
SteCoe_1690			KIAA1430 domain protein	blastp_trinity:NA	pfam:	3
SteCoe_16963			hypothetical protein	blastp_trinity:CFA46_HUMAN|63.5;	pfam:CFA46_HUMAN|63.5;	3
SteCoe_17099			Kinesin domain protein	blastp_trinity:KIF15_STRPU|423;	pfam:KIF15_STRPU|423;	3
SteCoe_1711			hypothetical protein			3
SteCoe_17194			hypothetical protein	blastp_trinity:NA	pfam:	3
SteCoe_17278			FAM184 domain protein	blastp_trinity:F184A_HUMAN|68.9;	pfam:F184A_HUMAN|68.9;	3
SteCoe_17299			TIP49 domain protein	blastp_trinity:RUVB2_XENLA|721;	pfam:RUVB2_XENLA|721;	3
SteCoe_17300			hypothetical protein			3
SteCoe_17337			hypothetical protein			3
SteCoe_1734			WD40 domain protein	blastp_trinity:HIRA_DROME|231;	pfam:HIRA_DROME|231;	3
SteCoe_17378			hypothetical protein			3
SteCoe_17428			hypothetical protein	blastp_trinity:NA	pfam:	3
SteCoe_17435			TTL domain protein	blastp_trinity:TTLL5_MOUSE|358;	pfam:TTLL5_MOUSE|358;	3
SteCoe_17438			hypothetical protein	blastp_trinity:NA	pfam:	3
SteCoe_17480			hypothetical protein	blastp_trinity:NA	pfam:	3
SteCoe_17509			hypothetical protein	blastp_trinity:NA	pfam:	3
SteCoe_17626			hypothetical protein			3
SteCoe_17659			IQ domain protein	blastp_trinity:NA	pfam:	3
SteCoe_17708			DUF676 domain protein			3
SteCoe_17794			PLK family kinase	blastp_trinity:CCR1_MAIZE|188;	pfam:CCR1_MAIZE|188;	3
SteCoe_17881			hypothetical protein	blastp_trinity:NA	pfam:	3
SteCoe_1789			hypothetical protein			3
SteCoe_17974			hypothetical protein	blastp_trinity:IMA8_BOVIN|97.8;	pfam:IMA8_BOVIN|97.8;	3
SteCoe_17989			zf-C2HC_2 domain protein	blastp_trinity:ZC21A_XENLA|85.1;	pfam:ZC21A_XENLA|85.1;	3
SteCoe_18002			Arm domain protein	blastp_trinity:IMPA3_ARATH|117;	pfam:IMPA3_ARATH|117;	3
SteCoe_18091			p25-alpha domain protein			3
SteCoe_18101			hypothetical protein			3
SteCoe_18115			hypothetical protein	blastp_trinity:NA	pfam:	3
SteCoe_18116			hypothetical protein	blastp_trinity:NA	pfam:	3
SteCoe_18122			ANAPC3 domain protein	blastp_trinity:NA	pfam:	3
SteCoe_18125			hypothetical protein	blastp_trinity:2AAA_BOVIN|345;	pfam:2AAA_BOVIN|345;	3
SteCoe_1817			DnaJ domain protein			3
SteCoe_18226			zf-RING_2 domain protein			3
SteCoe_1823			hypothetical protein	blastp_trinity:NA	pfam:	3
SteCoe_18246			hypothetical protein	blastp_trinity:NA	pfam:	3
SteCoe_1827		IFT88	TPR_8 domain protein	blastp_trinity:IFT88_HUMAN|550;	pfam:IFT88_HUMAN|550;	3
SteCoe_18270			CH domain protein			3
SteCoe_18307			DSPc domain protein	blastp_trinity:DUS1B_ARATH|85.1;	pfam:DUS1B_ARATH|85.1;	3
SteCoe_18317			PKG family kinase			3
SteCoe_18384			DUF3657 domain protein	blastp_trinity:F135A_PONAB|72.4;	pfam:F135A_PONAB|72.4;	3
SteCoe_18385	high		LRR_1 domain protein	blastp_trinity:NLRC3_HUMAN|84.7;	pfam:NLRC3_HUMAN|84.7;	3
SteCoe_18388			PDEase_I domain protein	blastp_trinity:PDE1B_RAT|202;	pfam:PDE1B_RAT|202;	3
SteCoe_18393			TPR_8 domain protein	blastp_trinity:NA	pfam:	3
SteCoe_1840			cNMP_binding domain protein	blastp_trinity:KAPR_APLCA|55.1;	pfam:KAPR_APLCA|55.1;	3
SteCoe_18419			hypothetical protein	blastp_trinity:NA	pfam:	3
SteCoe_1843			GAS domain protein			3
SteCoe_18439			hypothetical protein	blastp_trinity:FRAS1_MOUSE|79.0;	pfam:FRAS1_MOUSE|79.0;	3
SteCoe_18456		TRI37	zf-B_box domain protein	blastp_trinity:TRI37_HUMAN|369;	pfam:TRI37_HUMAN|369;	3
SteCoe_18476			Myb_DNA-bind_6 domain protein			3
SteCoe_18481			Enkurin domain protein			3
SteCoe_18517			hypothetical protein	blastp_trinity:NA	pfam:	3
SteCoe_18546			LRR_6 domain protein	blastp_trinity:NLRC3_MOUSE|54.7;	pfam:NLRC3_MOUSE|54.7;	3
SteCoe_18568			hypothetical protein	blastp_trinity:NA	pfam:	3
SteCoe_18577			ANAPC3 domain protein	blastp_trinity:TT30A_XENTR|409;	pfam:TT30A_XENTR|409;	3
SteCoe_18597			hypothetical protein			3
SteCoe_18640			hypothetical protein			3
SteCoe_18657			zf-C3HC4 domain protein	blastp_trinity:RBRA_DICDI|74.7;	pfam:RBRA_DICDI|74.7;	3
SteCoe_18728			hypothetical protein	blastp_trinity:CML3_ORYSJ|53.1;	pfam:CML3_ORYSJ|53.1;	3
SteCoe_18745			CDPK family kinase	blastp_trinity:CDPK1_PLAFK|315;	pfam:CDPK1_PLAFK|315;	3
SteCoe_18748			hypothetical protein	blastp_trinity:NA	pfam:	3
SteCoe_18763			hypothetical protein	blastp_trinity:RBP2A_PLAF7|57.4;	pfam:RBP2A_PLAF7|57.4;	3
SteCoe_18900			TPR_8 domain protein	blastp_trinity:TTC6_HUMAN|53.1;	pfam:TTC6_HUMAN|53.1;	3
SteCoe_18903			FHA domain protein			3
SteCoe_18905			hypothetical protein			3
SteCoe_18912			TTL domain protein	blastp_trinity:TTL6A_TETTS|491;	pfam:TTL6A_TETTS|491;	3
SteCoe_18966		dynein heavy chain	DUF4496 domain protein	blastp_trinity:DYH7_HUMAN|3379;	pfam:DYH7_HUMAN|3379;	3
SteCoe_19097			Phosphorylase domain protein			3
SteCoe_19225			PHM7_cyt domain protein			3
SteCoe_19241			MIF4G domain protein	blastp_trinity:IF4G_WHEAT|109;	pfam:IF4G_WHEAT|109;	3
SteCoe_19249			CK1 kinase	blastp_trinity:KC1_TOXGO|390;	pfam:KC1_TOXGO|390;	3
SteCoe_19251			TTL domain protein	blastp_trinity:TTL_MOUSE|134;	pfam:TTL_MOUSE|134;	3
SteCoe_19324		FAP57	WD40 domain protein	blastp_trinity:CFA57_MOUSE|323;	pfam:CFA57_MOUSE|323;	3
SteCoe_19353			hypothetical protein	blastp_trinity:NA	pfam:	3
SteCoe_19422	high		TPR_8 domain protein	blastp_trinity:OEP61_ARATH|83.2;	pfam:OEP61_ARATH|83.2;	3
SteCoe_19439			SNF2_N domain protein	blastp_trinity:RA54B_CHICK|441;	pfam:RA54B_CHICK|441;	3
SteCoe_19493			SHIPPO-rpt domain protein			3
SteCoe_19605			hypothetical protein	blastp_trinity:NA	pfam:	3
SteCoe_19621			hypothetical protein			3
SteCoe_19638			EF-hand_8 domain protein	blastp_trinity:CATR_ATRNU|57.8;	pfam:CATR_ATRNU|57.8;	3
SteCoe_19679			hypothetical protein	blastp_trinity:NA	pfam:	3
SteCoe_19835			hypothetical protein	blastp_trinity:NA	pfam:	3
SteCoe_19854			C2 domain protein			3
SteCoe_19977			A_deaminase domain protein	blastp_trinity:ADE_HAHCH|240;	pfam:ADE_HAHCH|240;	3
SteCoe_19990			hypothetical protein	blastp_trinity:NA	pfam:	3
SteCoe_19993			ThiF domain protein			3
SteCoe_20038			Ank_2 domain protein	blastp_trinity:TNKS1_HUMAN|60.5;	pfam:TNKS1_HUMAN|60.5;	3
SteCoe_20062			SAM_1 domain protein	blastp_trinity:NA	pfam:	3
SteCoe_20128			hypothetical protein			3
SteCoe_20229			zf-B_box domain protein	blastp_trinity:TRI37_MOUSE|286;	pfam:TRI37_MOUSE|286;	3
SteCoe_20233			HEAT_2 domain protein	blastp_trinity:NA	pfam:	3
SteCoe_203		FAP234 outer arm light chain	LRR_4 domain protein	blastp_trinity:LRRC9_MOUSE|581;	pfam:LRRC9_MOUSE|581;	3
SteCoe_20319		centrin 3	EF-hand_7 domain protein	blastp_trinity:CETN3_HUMAN|210;	pfam:CETN3_HUMAN|210;	3
SteCoe_20331			Ank_2 domain protein			3
SteCoe_204			Chorein_N domain protein	blastp_trinity:VP13A_MOUSE|65.9;	pfam:VP13A_MOUSE|65.9;	3
SteCoe_20443			hypothetical protein	blastp_trinity:NA	pfam:	3
SteCoe_20569			Kinesin domain protein			3
SteCoe_20571			hypothetical protein	blastp_trinity:NA	pfam:	3
SteCoe_20593			Peptidase_C97 domain protein			3
SteCoe_20605			DUSP domain protein	blastp_trinity:UBP5_ARATH|91.3;	pfam:UBP5_ARATH|91.3;	3
SteCoe_2063			hypothetical protein			3
SteCoe_20682	high		hypothetical protein	blastp_trinity:NA	pfam:	3
SteCoe_20745			Histone domain protein			3
SteCoe_20749			RINGv domain protein	blastp_trinity:MARH2_XENLA|60.1;	pfam:MARH2_XENLA|60.1;	3
SteCoe_20807			hypothetical protein	blastp_trinity:NA	pfam:	3
SteCoe_20877			Ion_trans domain protein			3
SteCoe_20892			hypothetical protein	blastp_trinity:NA	pfam:	3
SteCoe_20893			hypothetical protein	blastp_trinity:NA	pfam:	3
SteCoe_20899			kinase domain containing protein			3
SteCoe_20907			Kinesin domain protein			3
SteCoe_20918			hypothetical protein			3
SteCoe_20947			hypothetical protein			3
SteCoe_20954			IQ domain protein	blastp_trinity:NA	pfam:	3
SteCoe_21026			hypothetical protein	blastp_trinity:NA	pfam:	3
SteCoe_21160			hypothetical protein			3
SteCoe_21177			LRR_6 domain protein	blastp_trinity:NLRC3_HUMAN|106;	pfam:NLRC3_HUMAN|106;	3
SteCoe_21232			hypothetical protein	blastp_trinity:NA	pfam:	3
SteCoe_21260			hypothetical protein			3
SteCoe_21273			hypothetical protein	blastp_trinity:NA	pfam:	3
SteCoe_21274			14-3-3 domain protein	blastp_trinity:1433B_HORVU|249;	pfam:1433B_HORVU|249;	3
SteCoe_21330			WD40 domain protein	blastp_trinity:HETE1_PODAS|56.2;	pfam:HETE1_PODAS|56.2;	3
SteCoe_2135	high		hypothetical protein	blastp_trinity:NA	pfam:	3
SteCoe_21355		LRRC45	hypothetical protein	blastp_trinity:LRC56_MOUSE|56.6;	pfam:LRC56_MOUSE|56.6;	3
SteCoe_21379			hypothetical protein	blastp_trinity:NA	pfam:	3
SteCoe_21392			hypothetical protein	blastp_trinity:NA	pfam:	3
SteCoe_21393			TPR_8 domain protein	blastp_trinity:NA	pfam:	3
SteCoe_21414			RabGAP-TBC domain protein	blastp_trinity:EVI5_DROME|55.8;	pfam:EVI5_DROME|55.8;	3
SteCoe_21427			BAR_3 domain protein	blastp_trinity:ACAP3_HUMAN|130;	pfam:ACAP3_HUMAN|130;	3
SteCoe_21428		EF-hand 8 domain protein	EF-hand_8 domain protein	blastp_trinity:CAYP1_HUMAN|167;	pfam:CAYP1_HUMAN|167;	3
SteCoe_21439			hypothetical protein			3
SteCoe_2157			hypothetical protein	blastp_trinity:NA	pfam:	3
SteCoe_21679			hypothetical protein			3
SteCoe_2177			hypothetical protein	blastp_trinity:NA	pfam:	3
SteCoe_21806		LRRC45	LRR_6 domain protein	blastp_trinity:LRC45_MOUSE|142;	pfam:LRC45_MOUSE|142;	3
SteCoe_21833			PNP_UDP_1 domain protein			3
SteCoe_21950		FAP52	WD40 domain protein	blastp_trinity:CFA52_CHLRE|654;	pfam:CFA52_CHLRE|654;	3
SteCoe_22004			hypothetical protein	blastp_trinity:NA	pfam:	3
SteCoe_22009			SHIPPO-rpt domain protein	blastp_trinity:NA	pfam:	3
SteCoe_22037			DUF667 domain protein	blastp_trinity:CC067_MOUSE|60.8;	pfam:CC067_MOUSE|60.8;	3
SteCoe_22236			hypothetical protein	blastp_trinity:NA	pfam:	3
SteCoe_22278			hypothetical protein	blastp_trinity:NA	pfam:	3
SteCoe_22393			hypothetical protein			3
SteCoe_22438			hypothetical protein	blastp_trinity:NA	pfam:	3
SteCoe_22547			hypothetical protein	blastp_trinity:NA	pfam:	3
SteCoe_22550			zf-RING_2 domain protein	blastp_trinity:NA	pfam:	3
SteCoe_22588			PKD_channel domain protein			3
SteCoe_22589		Importin alpha	hypothetical protein	blastp_trinity:IMA6_DANRE|65.9;	pfam:IMA6_DANRE|65.9;	3
SteCoe_22595			Snf7 domain protein	blastp_trinity:CHMP7_XENTR|52.8;	pfam:CHMP7_XENTR|52.8;	3
SteCoe_22701			RCC1 domain protein	blastp_trinity:HERC1_HUMAN|81.6;	pfam:HERC1_HUMAN|81.6;	3
SteCoe_22787			PNTB domain protein			3
SteCoe_2281			hypothetical protein	blastp_trinity:NA	pfam:	3
SteCoe_22828			hypothetical protein			3
SteCoe_22910			NDR kinase	blastp_trinity:CBK1_CANAL|409;	pfam:CBK1_CANAL|409;	3
SteCoe_23030			hypothetical protein			3
SteCoe_23044			hypothetical protein			3
SteCoe_2305			hypothetical protein	blastp_trinity:NA	pfam:	3
SteCoe_23052			hypothetical protein	blastp_trinity:NA	pfam:	3
SteCoe_23074			Rdx domain protein	blastp_trinity:NA	pfam:	3
SteCoe_23096			hypothetical protein	blastp_trinity:NA	pfam:	3
SteCoe_23101			DUF4378 domain protein			3
SteCoe_23219			GLE1 domain protein	blastp_trinity:NA	pfam:	3
SteCoe_23244			zf-RING_UBOX domain protein			3
SteCoe_23279			WD40 domain protein	blastp_trinity:NA	pfam:	3
SteCoe_23350		inner dynein arm light chain	Ax_dynein_light domain protein	blastp_trinity:IDLC_CHLRE|239;	pfam:IDLC_CHLRE|239;	3
SteCoe_23370			hypothetical protein	blastp_trinity:NA	pfam:	3
SteCoe_23386		FAP251	WD40 domain protein	blastp_trinity:CF251_TETTS|669;	pfam:CF251_TETTS|669;	3
SteCoe_23447		hypothetical protein	hypothetical protein	blastp_trinity:NA	pfam:	3
SteCoe_23544		rsp4	Radial_spoke domain protein	blastp_trinity:RSH4A_HUMAN|174;	pfam:RSH4A_HUMAN|174;	3
SteCoe_23585			hypothetical protein	blastp_trinity:NA	pfam:	3
SteCoe_23654			PapD-like domain protein	blastp_trinity:NA	pfam:	3
SteCoe_23670			IBN_N domain protein	blastp_trinity:IMB1_ARATH|288;	pfam:IMB1_ARATH|288;	3
SteCoe_23678			hypothetical protein	blastp_trinity:NA	pfam:	3
SteCoe_23679			Ank_4 domain protein			3
SteCoe_237			DUF3546 domain protein	blastp_trinity:SRRTA_XENLA|104;	pfam:SRRTA_XENLA|104;	3
SteCoe_23768			WD40 domain protein	blastp_trinity:Y2800_NOSS1|63.2;	pfam:Y2800_NOSS1|63.2;	3
SteCoe_23775			Cyclin	blastp_trinity:CCNE_DROME|105;	pfam:CCNE_DROME|105;	3
SteCoe_23787			C2 domain protein	blastp_trinity:NA	pfam:	3
SteCoe_2379			TTL domain protein	blastp_trinity:TTL3D_TETTS|152;	pfam:TTL3D_TETTS|152;	3
SteCoe_23816			TFIIS_M domain protein	blastp_trinity:BYE1_YARLI|55.8;	pfam:BYE1_YARLI|55.8;	3
SteCoe_23849			hypothetical protein	blastp_trinity:NA	pfam:	3
SteCoe_23881			NDR kinase	blastp_trinity:ST38L_HUMAN|400;	pfam:ST38L_HUMAN|400;	3
SteCoe_23893			Ank_4 domain protein	blastp_trinity:ZDHC2_ARATH|148;	pfam:ZDHC2_ARATH|148;	3
SteCoe_24019			hypothetical protein			3
SteCoe_24076			hypothetical protein			3
SteCoe_24127			TKL related kinase	blastp_trinity:SIS8_ARATH|185;	pfam:SIS8_ARATH|185;	3
SteCoe_24155			hypothetical protein			3
SteCoe_24240		FAP61	DUF4821 domain protein	blastp_trinity:CFA61_TETTS|279;	pfam:CFA61_TETTS|279;	3
SteCoe_24256			Metallophos domain protein	blastp_trinity:PP2B2_DROME|408;	pfam:PP2B2_DROME|408;	3
SteCoe_24258		RJL1	DnaJ domain protein	blastp_trinity:DJC27_DANRE|165;	pfam:DJC27_DANRE|165;	3
SteCoe_24271			TPR_12 domain protein	blastp_trinity:NA	pfam:	3
SteCoe_24292			TPR_16 domain protein	blastp_trinity:SRFR1_ARATH|73.6;	pfam:SRFR1_ARATH|73.6;	3
SteCoe_24347			CDPK family kinase	blastp_trinity:CDPK1_PLAFK|368;	pfam:CDPK1_PLAFK|368;	3
SteCoe_24359			hypothetical protein	blastp_trinity:NA	pfam:	3
SteCoe_24384			hypothetical protein	blastp_trinity:NA	pfam:	3
SteCoe_24396			hypothetical protein	blastp_trinity:NA	pfam:	3
SteCoe_24443			GAF domain protein	blastp_trinity:PDE11_DROME|78.6;	pfam:PDE11_DROME|78.6;	3
SteCoe_24456			hypothetical protein	blastp_trinity:NA	pfam:	3
SteCoe_24494			Methyltransf_11 domain protein	blastp_trinity:EFMT4_HUMAN|132;	pfam:EFMT4_HUMAN|132;	3
SteCoe_24535			hypothetical protein	blastp_trinity:NA	pfam:	3
SteCoe_24536		FAP267 TTL8	TTL domain protein	blastp_trinity:TTLL3_DANRE|140;	pfam:TTLL3_DANRE|140;	3
SteCoe_24561			PP2C domain protein	blastp_trinity:PP2C1_YEAST|140;	pfam:PP2C1_YEAST|140;	3
SteCoe_24597		zinc carboxypeptidase	Peptidase_M14 domain protein	blastp_trinity:CBPC2_XENTR|360;	pfam:CBPC2_XENTR|360;	3
SteCoe_24638		IFT57	IFT57 domain protein	blastp_trinity:IFT57_DANRE|209;	pfam:IFT57_DANRE|209;	3
SteCoe_24639			MKT1_C domain protein	blastp_trinity:NA	pfam:	3
SteCoe_2464			HTH_Tnp_1 domain protein	blastp_trinity:NA	pfam:	3
SteCoe_2467			TPR_10 domain protein	blastp_trinity:NA	pfam:	3
SteCoe_24688			Thioredoxin domain protein	blastp_trinity:PDIA3_CHICK|97.4;	pfam:PDIA3_CHICK|97.4;	3
SteCoe_24792		DRC4	GAS domain protein	blastp_trinity:DRC4_CHLRE|300;	pfam:DRC4_CHLRE|300;	3
SteCoe_24833			Chorein_N domain protein	blastp_trinity:VP13A_MOUSE|63.2;	pfam:VP13A_MOUSE|63.2;	3
SteCoe_24898			DUF4704 domain protein	blastp_trinity:LVSC_DICDI|382;	pfam:LVSC_DICDI|382;	3
SteCoe_24919			hypothetical protein			3
SteCoe_24921			hypothetical protein			3
SteCoe_24929			Nuf2 domain protein	blastp_trinity:NUF2_ARATH|72.0;	pfam:NUF2_ARATH|72.0;	3
SteCoe_24932			Ins145_P3_rec domain protein	blastp_trinity:ITPR3_MOUSE|164;	pfam:ITPR3_MOUSE|164;	3
SteCoe_24939		FAP52	WD40 domain protein	blastp_trinity:CFA52_CHLRE|649;	pfam:CFA52_CHLRE|649;	3
SteCoe_24960			hypothetical protein			3
SteCoe_2499			Homeobox domain protein			3
SteCoe_24993			CLASP_N domain protein			3
SteCoe_2502			hypothetical protein			3
SteCoe_25041			ADK domain protein	blastp_trinity:KAD8_DANRE|186;	pfam:KAD8_DANRE|186;	3
SteCoe_25054			SRPK family kinase	blastp_trinity:DSK1_SCHPO|343;	pfam:DSK1_SCHPO|343;	3
SteCoe_25118			CS domain protein			3
SteCoe_25193			hypothetical protein	blastp_trinity:NA	pfam:	3
SteCoe_2522			DOMON domain protein	blastp_trinity:NCB5R_KLULA|60.1;	pfam:NCB5R_KLULA|60.1;	3
SteCoe_25359			ULK family kinase	blastp_trinity:RUK_ARATH|508;	pfam:RUK_ARATH|508;	3
SteCoe_25391			hypothetical protein	blastp_trinity:NA	pfam:	3
SteCoe_25402			hypothetical protein	blastp_trinity:NA	pfam:	3
SteCoe_25419			hypothetical protein	blastp_trinity:NA	pfam:	3
SteCoe_25425			hypothetical protein			3
SteCoe_25432			NEK family kinase	blastp_trinity:NEK2_DICDI|365;	pfam:NEK2_DICDI|365;	3
SteCoe_25535			hypothetical protein			3
SteCoe_25565			hypothetical protein	blastp_trinity:NA	pfam:	3
SteCoe_25607			LRR_4 domain protein	blastp_trinity:LRIQ1_MOUSE|63.5;	pfam:LRIQ1_MOUSE|63.5;	3
SteCoe_25615		FAP267 TTL8	TTL domain protein	blastp_trinity:TTLL9_RAT|411;	pfam:TTLL9_RAT|411;	3
SteCoe_25698			hypothetical protein	blastp_trinity:NA	pfam:	3
SteCoe_25734			hypothetical protein	blastp_trinity:NA	pfam:	3
SteCoe_25762			hypothetical protein	blastp_trinity:NA	pfam:	3
SteCoe_25764		FAP69	hypothetical protein	blastp_trinity:CFA69_PAPAN|123;	pfam:CFA69_PAPAN|123;	3
SteCoe_25773			hypothetical protein			3
SteCoe_25800		ERD4-related membrane protein	PHM7_cyt domain protein	blastp_trinity:CSC1_HUMAN|79.7;	pfam:CSC1_HUMAN|79.7;	3
SteCoe_25939			hypothetical protein			3
SteCoe_25961			hypothetical protein	blastp_trinity:NA	pfam:	3
SteCoe_2597			hypothetical protein			3
SteCoe_26007			WD40 domain protein	blastp_trinity:Y2800_NOSS1|60.5;	pfam:Y2800_NOSS1|60.5;	3
SteCoe_26093			Myb_DNA-bind_6 domain protein	blastp_trinity:MB3R5_ARATH|158;	pfam:MB3R5_ARATH|158;	3
SteCoe_26100			Enkurin domain protein	blastp_trinity:ENKD1_MOUSE|82.4;	pfam:ENKD1_MOUSE|82.4;	3
SteCoe_26116			RabGAP-TBC domain protein	blastp_trinity:SGSM3_DANRE|73.2;	pfam:SGSM3_DANRE|73.2;	3
SteCoe_26157			hypothetical protein			3
SteCoe_26193			hypothetical protein			3
SteCoe_2624	high		hypothetical protein	blastp_trinity:NA	pfam:	3
SteCoe_26245			Guanylate Cyclase with N-terminal phospholipid ATPase domain	blastp_trinity:AT8A1_HUMAN|761;	pfam:AT8A1_HUMAN|761;	3
SteCoe_26262			Aurora family kinase			3
SteCoe_26282			CDK-like pseudokinase with cyclin domains	blastp_trinity:CDKA2_ORYSJ|166;	pfam:CDKA2_ORYSJ|166;	3
SteCoe_26297		FAP256 / CEP104	XRCC1_N domain protein	blastp_trinity:CE104_HUMAN|317;	pfam:CE104_HUMAN|317;	3
SteCoe_26319			Homeobox domain protein			3
SteCoe_26390			Kinesin domain protein	blastp_trinity:KIF28_MOUSE|445;	pfam:KIF28_MOUSE|445;	3
SteCoe_26402			NEK family kinase	blastp_trinity:NEK2_DICDI|359;	pfam:NEK2_DICDI|359;	3
SteCoe_26477			UCH domain protein	blastp_trinity:UBP24_HUMAN|258;	pfam:UBP24_HUMAN|258;	3
SteCoe_26479			hypothetical protein	blastp_trinity:NA	pfam:	3
SteCoe_26533			hypothetical protein	blastp_trinity:LEA1_APHAV|51.2;	pfam:LEA1_APHAV|51.2;	3
SteCoe_26717			ABC_membrane domain protein			3
SteCoe_26735		FAP127 Meiosis specific nuclear structural protein	TPH domain protein	blastp_trinity:MNS1_MOUSE|122;	pfam:MNS1_MOUSE|122;	3
SteCoe_2675			HMG_box domain protein			3
SteCoe_26784			UCH domain protein	blastp_trinity:UBP54_MOUSE|60.8;	pfam:UBP54_MOUSE|60.8;	3
SteCoe_26792			hypothetical protein			3
SteCoe_26814			DUF4200 domain protein	blastp_trinity:CCD42_HUMAN|57.4;	pfam:CCD42_HUMAN|57.4;	3
SteCoe_26816			Peptidase_C2 domain protein	blastp_trinity:CAN15_MOUSE|256;	pfam:CAN15_MOUSE|256;	3
SteCoe_26963		RIB72	DUF1126 domain protein	blastp_trinity:EFHC1_HUMAN|316;	pfam:EFHC1_HUMAN|316;	3
SteCoe_27005			hypothetical protein	blastp_trinity:GP210_ARATH|81.6;	pfam:GP210_ARATH|81.6;	3
SteCoe_27006			hypothetical protein			3
SteCoe_27013			DUF4549 domain protein	blastp_trinity:NA	pfam:	3
SteCoe_27062			TPH domain protein	blastp_trinity:CC173_MOUSE|64.7;	pfam:CC173_MOUSE|64.7;	3
SteCoe_2707			hypothetical protein	blastp_trinity:NA	pfam:	3
SteCoe_27075			hypothetical protein	blastp_trinity:TRAD1_MOUSE|72.8;	pfam:TRAD1_MOUSE|72.8;	3
SteCoe_27131			hypothetical protein	blastp_trinity:NA	pfam:	3
SteCoe_27189			hypothetical protein			3
SteCoe_27246			hypothetical protein			3
SteCoe_27257			hypothetical protein			3
SteCoe_27326	high		Ras domain protein	blastp_trinity:RAA2A_ARATH|281;	pfam:RAA2A_ARATH|281;	3
SteCoe_27371			Cullin domain protein	blastp_trinity:CUL3B_ARATH|491;	pfam:CUL3B_ARATH|491;	3
SteCoe_27379			WD40 domain protein			3
SteCoe_27484			hypothetical protein	blastp_trinity:NA	pfam:	3
SteCoe_27512			PCI domain protein	blastp_trinity:PSD11_RAT|414;	pfam:PSD11_RAT|414;	3
SteCoe_27517			Nic96 domain protein			3
SteCoe_27531			ubiquitin domain protein	blastp_trinity:RHP23_SCHPO|156;	pfam:RHP23_SCHPO|156;	3
SteCoe_27536			hypothetical protein	blastp_trinity:NA	pfam:	3
SteCoe_2757			cdc2-related pseudokinase with cyclin domains	blastp_trinity:CDK2_XENLA|170;	pfam:CDK2_XENLA|170;	3
SteCoe_27603			LRR_6 domain protein	blastp_trinity:NLRC3_MOUSE|56.6;	pfam:NLRC3_MOUSE|56.6;	3
SteCoe_27611		dynein intermediate chain DIC5	hypothetical protein	blastp_trinity:WDR34_HUMAN|136;	pfam:WDR34_HUMAN|136;	3
SteCoe_27694			CAMKL family kinase	blastp_trinity:MARK4_HUMAN|170;	pfam:MARK4_HUMAN|170;	3
SteCoe_2770			Arrestin_N domain protein	blastp_trinity:ARRD2_HUMAN|62.8;	pfam:ARRD2_HUMAN|62.8;	3
SteCoe_27721			MYCBPAP domain protein			3
SteCoe_27785			hypothetical protein	blastp_trinity:CC151_MOUSE|133;	pfam:CC151_MOUSE|133;	3
SteCoe_27877			hypothetical protein	blastp_trinity:NA	pfam:	3
SteCoe_27891			hypothetical protein	blastp_trinity:2AAB_PIG|217;	pfam:2AAB_PIG|217;	3
SteCoe_27907			hypothetical protein	blastp_trinity:NA	pfam:	3
SteCoe_27936			hypothetical protein	blastp_trinity:NA	pfam:	3
SteCoe_27956			CBM_20 domain protein			3
SteCoe_27958			MORN domain protein	blastp_trinity:RS10B_DANRE|58.2;	pfam:RS10B_DANRE|58.2;	3
SteCoe_27962			hypothetical protein	blastp_trinity:NA	pfam:	3
SteCoe_27963			hypothetical protein	blastp_trinity:NA	pfam:	3
SteCoe_28006		FAP44	hypothetical protein	blastp_trinity:CFA44_HUMAN|353;	pfam:CFA44_HUMAN|353;	3
SteCoe_28020			hypothetical protein	blastp_trinity:NA	pfam:	3
SteCoe_2803			TTL domain protein	blastp_trinity:TTLL5_HUMAN|336;	pfam:TTLL5_HUMAN|336;	3
SteCoe_28111			FOP_dimer domain protein	blastp_trinity:FR1OP_MACFA|57.8;	pfam:FR1OP_MACFA|57.8;	3
SteCoe_28130			hypothetical protein			3
SteCoe_28166			hypothetical protein			3
SteCoe_28200		ODA1 dynein arm docking complex	hypothetical protein	blastp_trinity:ODA1_CHLRE|125;	pfam:ODA1_CHLRE|125;	3
SteCoe_2821			DEAD domain protein			3
SteCoe_2823			hypothetical protein	blastp_trinity:NA	pfam:	3
SteCoe_28248			hypothetical protein	blastp_trinity:NA	pfam:	3
SteCoe_28256			Kelch_4 domain protein	blastp_trinity:BSU1_ARATH|389;	pfam:BSU1_ARATH|389;	3
SteCoe_28315	T-complex protein 10		Tcp10_C domain protein	blastp_trinity:CENPJ_MOUSE|167;	pfam:CENPJ_MOUSE|167;	3
SteCoe_28359			hypothetical protein	blastp_trinity:YIPF2_MOUSE|79.3;	pfam:YIPF2_MOUSE|79.3;	3
SteCoe_28364			hypothetical protein			3
SteCoe_284	high		IBB domain protein	blastp_trinity:IMPA2_ARATH|307;	pfam:IMPA2_ARATH|307;	3
SteCoe_28445			BTB domain protein	blastp_trinity:NA	pfam:	3
SteCoe_2848			hypothetical protein	blastp_trinity:NA	pfam:	3
SteCoe_28540			hypothetical protein			3
SteCoe_28581		MBO2/FAP193	hypothetical protein	blastp_trinity:CC146_HUMAN|294;	pfam:CC146_HUMAN|294;	3
SteCoe_28627			hypothetical protein			3
SteCoe_28652			Abhydrolase_1 domain protein	blastp_trinity:ABHD3_HUMAN|149;	pfam:ABHD3_HUMAN|149;	3
SteCoe_28654			hypothetical protein	blastp_trinity:NA	pfam:	3
SteCoe_2870			hypothetical protein	blastp_trinity:NA	pfam:	3
SteCoe_28715			DUF667 domain protein			3
SteCoe_28780			hypothetical protein			3
SteCoe_28834			ArfGap domain protein	blastp_trinity:AGD5_ARATH|136;	pfam:AGD5_ARATH|136;	3
SteCoe_28839			hypothetical protein			3
SteCoe_28865			hypothetical protein	blastp_trinity:NA	pfam:	3
SteCoe_2894			CLASP_N domain protein	blastp_trinity:CKAP5_HUMAN|473;	pfam:CKAP5_HUMAN|473;	3
SteCoe_28953		FAP267 TTL8	TTL domain protein	blastp_trinity:TTL3B_TETTS|140;	pfam:TTL3B_TETTS|140;	3
SteCoe_2899			hypothetical protein	blastp_trinity:NA	pfam:	3
SteCoe_29059			hypothetical protein			3
SteCoe_29141		FAP267 TTL8	TTL domain protein	blastp_trinity:TTL3D_TETTS|151;	pfam:TTL3D_TETTS|151;	3
SteCoe_29219		CEP164	WW domain protein	blastp_trinity:CE164_MOUSE|124;	pfam:CE164_MOUSE|124;	3
SteCoe_29238			Hydrolase_4 domain protein			3
SteCoe_29262			hypothetical protein	blastp_trinity:NA	pfam:	3
SteCoe_29278			EF-hand_4 domain protein			3
SteCoe_2930			UEV domain protein			3
SteCoe_29312			BRCA-2_helical domain protein	blastp_trinity:BRCA2_RAT|116;	pfam:BRCA2_RAT|116;	3
SteCoe_2933			NUFIP1 domain protein	blastp_trinity:NA	pfam:	3
SteCoe_29409		hypothetical protein	hypothetical protein	blastp_trinity:NA	pfam:	3
SteCoe_29417			zf-RING_2 domain protein	blastp_trinity:FLY1_ARATH|90.1;	pfam:FLY1_ARATH|90.1;	3
SteCoe_29433			hypothetical protein	blastp_trinity:NA	pfam:	3
SteCoe_29463			hypothetical protein			3
SteCoe_295			WD40 domain protein	blastp_trinity:YY46_NOSS1|111;	pfam:YY46_NOSS1|111;	3
SteCoe_29513			hypothetical protein			3
SteCoe_29518			hypothetical protein	blastp_trinity:NA	pfam:	3
SteCoe_29540			hypothetical protein			3
SteCoe_29554		CPC1	CH_2 domain protein	blastp_trinity:SPEF2_RAT|85.9;	pfam:SPEF2_RAT|85.9;	3
SteCoe_29557			Ion_trans domain protein	blastp_trinity:KAT3_ORYSJ|137;	pfam:KAT3_ORYSJ|137;	3
SteCoe_29565			hypothetical protein	blastp_trinity:NA	pfam:	3
SteCoe_2958			hypothetical protein	blastp_trinity:NA	pfam:	3
SteCoe_29607			Enkurin domain protein	blastp_trinity:NA	pfam:	3
SteCoe_29636			NDR kinase			3
SteCoe_2974			hypothetical protein	blastp_trinity:TRAD1_BOVIN|75.1;	pfam:TRAD1_BOVIN|75.1;	3
SteCoe_29788			hypothetical protein			3
SteCoe_29797			hypothetical protein	blastp_trinity:TTC12_HUMAN|111;	pfam:TTC12_HUMAN|111;	3
SteCoe_298			hypothetical protein	blastp_trinity:NA	pfam:	3
SteCoe_29840			Notch domain protein	blastp_trinity:Y1931_DICDI|66.6;	pfam:Y1931_DICDI|66.6;	3
SteCoe_29850			Kelch_1 domain protein			3
SteCoe_29854			RCC1 domain protein	blastp_trinity:HERC1_HUMAN|94.7;	pfam:HERC1_HUMAN|94.7;	3
[truncated: 1,695 more rows]
