# Supplementary material for: Modular, cascade-like transcriptional program of regeneration in Stentor
Source: eLife. 2022 Aug 4;11:e80778. doi: 10.7554/eLife.80778 (PMC9371601; doi:10.7554/eLife.80778)
Supplement: Supplementary file 3. [file elife-80778-supp3.xlsx]

## Sheet: Sheet1
Gene	Manual Annotation	StentorDB_Description	blastp_trinity	pfam	ClusterPlotOrder
SteCoe_3940	papain family cysteine protease	Inhibitor_I29 domain protein	blastp_trinity:XCP1_ARATH|261;	pfam:XCP1_ARATH|261;	1
SteCoe_2117	thioredoxin peroxidase	AhpC-TSA domain protein	blastp_trinity:TDX_CYNPY|229;	pfam:TDX_CYNPY|229;	1
SteCoe_13226	hypothetical protein	Patatin domain protein	blastp_trinity:NA	pfam:	1
SteCoe_29651	serine carboxypeptidase	Peptidase_S28 domain protein	blastp_trinity:PCP_BOVIN|310;	pfam:PCP_BOVIN|310;	1
SteCoe_19697	glycosyl hydrolase	NtCtMGAM_N domain protein	blastp_trinity:LYAG_MOUSE|442;	pfam:LYAG_MOUSE|442;	1
SteCoe_35381	thioredoxin peroxidase	hypothetical protein	blastp_trinity:TDX_CYNPY|223;	pfam:TDX_CYNPY|223;	1
SteCoe_1594	hypothetical protein	hypothetical protein	blastp_trinity:NA	pfam:	1
SteCoe_3538	hypothetical protein	hypothetical protein	blastp_trinity:NA	pfam:	1
SteCoe_10733	hypothetical protein	Patatin domain protein	blastp_trinity:NA	pfam:	1
SteCoe_1624	serine carboxypeptidase	Peptidase_S10 domain protein	blastp_trinity:CBPX_ORYSJ|168;	pfam:CBPX_ORYSJ|168;	1
SteCoe_16003	serine carboxypeptidase	Peptidase_S10 domain protein	blastp_trinity:CPVL_DICDI|171;	pfam:CPVL_DICDI|171;	1
SteCoe_20115	histone H4	CENP-T_C domain protein	blastp_trinity:H4_PYRSA|155;	pfam:H4_PYRSA|155;	1
SteCoe_6848	aspartyl protease	Asp domain protein	blastp_trinity:CARP_ASPFU|67.4;	pfam:CARP_ASPFU|67.4;	1
SteCoe_36156	hypothetical protein	hypothetical protein	blastp_trinity:NA	pfam:	1
SteCoe_25990	carbamoyl-phosphate synthase	Biotin_carb_N domain protein	blastp_trinity:PCCA_MOUSE|646;	pfam:PCCA_MOUSE|646;	1
SteCoe_4526	hypothetical protein	SLT domain protein	blastp_trinity:NA	pfam:	1
SteCoe_17334	glycosyl hydrolase	Glyco_hydro_1 domain protein	blastp_trinity:BGL40_ARATH|419;	pfam:BGL40_ARATH|419;	1
SteCoe_30880	serine carboxypeptidase	Peptidase_S10 domain protein	blastp_trinity:SCP50_ARATH|178;	pfam:SCP50_ARATH|178;	1
SteCoe_28649	hypothetical protein	Patatin domain protein	blastp_trinity:NA	pfam:	1
SteCoe_23114	hypothetical protein	hypothetical protein	blastp_trinity:NA	pfam:	1
SteCoe_24858	Glutathione S-transferase	GST_N domain protein	blastp_trinity:GSTT1_MOUSE|119;	pfam:GSTT1_MOUSE|119;	1
SteCoe_11971	serine carboxypeptidase	Peptidase_S28 domain protein	blastp_trinity:DPP2_RAT|256;	pfam:DPP2_RAT|256;	1
SteCoe_24844	hypothetical protein	hypothetical protein	blastp_trinity:NA	pfam:	1
SteCoe_36702	START domain protein	START domain protein	blastp_trinity:C43BP_DANRE|56.6;	pfam:C43BP_DANRE|56.6;	1
SteCoe_1171	papain family cysteine protease	Inhibitor_I29 domain protein	blastp_trinity:SAG39_ORYSJ|276;	pfam:SAG39_ORYSJ|276;	1
SteCoe_33478	S1P1 nuclease	hypothetical protein	blastp_trinity:ENDO1_ARATH|92.4;	pfam:ENDO1_ARATH|92.4;	1
SteCoe_33761	sulpher transport protein	hypothetical protein	blastp_trinity:Y1893_XYLFT|67.4;	pfam:Y1893_XYLFT|67.4;	1
SteCoe_11381	WD40 domain protein	WD40 domain protein	blastp_trinity:WDR51_CAEEL|59.7;	pfam:WDR51_CAEEL|59.7;	1
SteCoe_19299	Rab GAP	RabGAP-TBC domain protein	blastp_trinity:GRT1A_DANRE|87.0;	pfam:GRT1A_DANRE|87.0;	1
SteCoe_11439	GTP-cyclohydrolase	GTP_cyclohydroI domain protein	blastp_trinity:GCH1_DEIRA|167;	pfam:GCH1_DEIRA|167;	1
SteCoe_13401	mitochondrial superoxide dismutase	Sod_Fe_N domain protein	blastp_trinity:SODM1_LEPBY|174;	pfam:SODM1_LEPBY|174;	1
SteCoe_25711	mitochondrial glutathione oxidoreductase	Pyr_redox_2 domain protein	blastp_trinity:GASHR_MARGR|236;	pfam:GASHR_MARGR|236;	1
SteCoe_11442	hypothetical protein	hypothetical protein	blastp_trinity:NA	pfam:	1
SteCoe_5927	hypothetical protein	DUF1349 domain protein	blastp_trinity:REE1_YEAST|103;	pfam:REE1_YEAST|103;	1
SteCoe_24583	papain family cysteine protease	Inhibitor_I29 domain protein	blastp_trinity:SAG39_ORYSJ|186;	pfam:SAG39_ORYSJ|186;	1
SteCoe_34298	ELFV aminoi acid dehydrogenase	hypothetical protein	blastp_trinity:DHE3_DICDI|413;	pfam:DHE3_DICDI|413;	1
SteCoe_20440	Enoyl-CoA hydratase 2	MaoC_dehydrat_N domain protein	blastp_trinity:DHB4_HUMAN|236;	pfam:DHB4_HUMAN|236;	1
SteCoe_18172	Ubiquitin-activating enzyme E1	ThiF domain protein	blastp_trinity:UBA1_HUMAN|817;	pfam:UBA1_HUMAN|817;	1
SteCoe_11380		WD40 domain protein			1
SteCoe_13963		hypothetical protein			1
SteCoe_14597		hypothetical protein			1
SteCoe_1653		hypothetical protein			1
SteCoe_19389		LRR_6 domain protein			1
SteCoe_1940		hypothetical protein			1
SteCoe_24154		DUF818 domain protein			1
SteCoe_24562		PI4 kinase			1
SteCoe_26579		DYRK family kinase			1
SteCoe_34921		Cyclin			1
SteCoe_35452		hypothetical protein			1
SteCoe_37469		hypothetical protein			1
SteCoe_4541		hypothetical protein			1
SteCoe_533		hypothetical protein			1
SteCoe_8359		hypothetical protein			1
SteCoe_9362		DOMON domain protein			1
SteCoe_9735		Palm_thioest domain protein			1
SteCoe_3923	hypothetical protein	hypothetical protein	blastp_trinity:NA	pfam:	2
SteCoe_37262	hypothetical protein	hypothetical protein	blastp_trinity:NA	pfam:	2
SteCoe_30958	GSK family kinase	GSK family kinase	blastp_trinity:GSK3B_XENLA|463;	pfam:GSK3B_XENLA|463;	2
SteCoe_12287	FAP234	hypothetical protein	blastp_trinity:PP1R7_RAT|67.0;	pfam:PP1R7_RAT|67.0;	2
SteCoe_1303	hypothetical protein	hypothetical protein	blastp_trinity:NA	pfam:	2
SteCoe_17594	hypothetical protein	hypothetical protein	blastp_trinity:NA	pfam:	2
SteCoe_37174	hypothetical protein	hypothetical protein	blastp_trinity:NA	pfam:	2
SteCoe_13622	dual specificity phosphatase	DSPc domain protein	blastp_trinity:SSH_XENLA|111;	pfam:SSH_XENLA|111;	2
SteCoe_4318	hypothetical protein	TPR_16 domain protein	blastp_trinity:SRFR1_ARATH|60.5;	pfam:SRFR1_ARATH|60.5;	2
SteCoe_33668	hypothetical protein	hypothetical protein	blastp_trinity:NA	pfam:	2
SteCoe_23685	topoisomerase ii	HATPase_c domain protein	blastp_trinity:TOP2_ARATH|1145;	pfam:TOP2_ARATH|1145;	2
SteCoe_22374	hypothetical protein	hypothetical protein	blastp_trinity:NA	pfam:	2
SteCoe_38122	hypothetical protein	hypothetical protein	blastp_trinity:NA	pfam:	2
SteCoe_36479	histone H2B	hypothetical protein	blastp_trinity:H2B_EUPCR|168;	pfam:H2B_EUPCR|168;	2
SteCoe_34515	centrin famliy EF hand protein	hypothetical protein	blastp_trinity:CATR_NAEGR|125;	pfam:CATR_NAEGR|125;	2
SteCoe_355	hypothetical protein	hypothetical protein	blastp_trinity:NA	pfam:	2
SteCoe_17819	hypothetical protein	hypothetical protein	blastp_trinity:NA	pfam:	2
SteCoe_23274	hypothetical protein	hypothetical protein	blastp_trinity:NA	pfam:	2
SteCoe_9914	histone H2B	Histone domain protein	blastp_trinity:H2B_EUPCR|166;	pfam:H2B_EUPCR|166;	2
SteCoe_28414	WD40 domain protein related to IFT122	WD40 domain protein	blastp_trinity:IF122_XENTR|1025;	pfam:IF122_XENTR|1025;	2
SteCoe_5460	CDPK family kinase	CDPK family kinase	blastp_trinity:CDPK1_PLAFK|291;	pfam:CDPK1_PLAFK|291;	2
SteCoe_10025	T-complex protein 10	Tcp10_C domain protein	blastp_trinity:CENPJ_PANTR|53.5;	pfam:CENPJ_PANTR|53.5;	2
SteCoe_7089	BBS8 cilia-related TPR protein	TPR_1 domain protein	blastp_trinity:CYC8_DICDI|97.8;	pfam:CYC8_DICDI|97.8;	2
SteCoe_15561	cyclin	Cyclin	blastp_trinity:CCNE_DROME|106;	pfam:CCNE_DROME|106;	2
SteCoe_25328	RCC1	RCC1 domain protein	blastp_trinity:UVR8_ARATH|74.7;	pfam:UVR8_ARATH|74.7;	2
SteCoe_28379	KELCH repeat protein	zf-C3HC4 domain protein	blastp_trinity:KLH12_DANRE|109;	pfam:KLH12_DANRE|109;	2
SteCoe_26284	hypothetical protein	Kelch_6 domain protein	blastp_trinity:NA	pfam:	2
SteCoe_26841	Myb-like DNA binding protein	Myb_DNA-binding domain protein	blastp_trinity:MYBA_MOUSE|120;	pfam:MYBA_MOUSE|120;	2
SteCoe_22078	katanin p60 subunit	AAA domain protein	blastp_trinity:KATL1_DANRE|446;	pfam:KATL1_DANRE|446;	2
SteCoe_8825	hypothetical protein	hypothetical protein	blastp_trinity:NA	pfam:	2
SteCoe_13493	dual specificity phosphatase	DSPc domain protein	blastp_trinity:DUS1B_ARATH|80.9;	pfam:DUS1B_ARATH|80.9;	2
SteCoe_33525	CDK family kinase	CDK family kinase	blastp_trinity:CDK2_HUMAN|311;	pfam:CDK2_HUMAN|311;	2
SteCoe_27682	KELCH repeat protein	zf-C3HC4 domain protein	blastp_trinity:KLH12_DANRE|108;	pfam:KLH12_DANRE|108;	2
SteCoe_28268	MOB1	Mob1_phocein domain protein	blastp_trinity:MOB1A_DICDI|296;	pfam:MOB1A_DICDI|296;	2
SteCoe_37355	B9D2 ciliary protein	B9-C2 domain protein	blastp_trinity:B9D2_HUMAN|148;	pfam:B9D2_HUMAN|148;	2
SteCoe_31601	Phosphoinositide phosphatase	Syja_N domain protein	blastp_trinity:SYJ1_SCHPO|370;	pfam:SYJ1_SCHPO|370;	2
SteCoe_22400	WD40 domain protein	WD40 domain protein	blastp_trinity:YY46_NOSS1|144;	pfam:YY46_NOSS1|144;	2
SteCoe_22298	hypothetical protein	hypothetical protein	blastp_trinity:NA	pfam:	2
SteCoe_10180	kinase related to Ciliate-E2-Unclassified subfamily	kinase related to Ciliate-E2-Unclassified subfamily	blastp_trinity:Y2070_DICDI|223;	pfam:Y2070_DICDI|223;	2
SteCoe_9809	CDPK family kinase	CDPK family kinase	blastp_trinity:CDPK1_PLAFK|352;	pfam:CDPK1_PLAFK|352;	2
SteCoe_10333	PKG family kinase	PKG family kinase	blastp_trinity:KGP1_DROME|62.8;	pfam:KGP1_DROME|62.8;	2
SteCoe_24408	3',5'-cyclic-nucleotide phosphodiesterase	GAF domain protein	blastp_trinity:PDE11_DROME|53.9;	pfam:PDE11_DROME|53.9;	2
SteCoe_28726	ribonucleotide reductase	ATP-cone domain protein	blastp_trinity:RIR1_MOUSE|1062;	pfam:RIR1_MOUSE|1062;	2
SteCoe_36724	POC1	WD40 domain protein	blastp_trinity:POC1A_MOUSE|291;	pfam:POC1A_MOUSE|291;	2
SteCoe_17700	LRR domain protein	LRR_9 domain protein	blastp_trinity:CU002_HUMAN|157;	pfam:CU002_HUMAN|157;	2
SteCoe_6250	MAP kinase family member	ERK7 subfamily kinase	blastp_trinity:ERK2_DICDI|519;	pfam:ERK2_DICDI|519;	2
SteCoe_32265	ULK family kinase	ULK family kinase	blastp_trinity:ATG1B_ARATH|209;	pfam:ATG1B_ARATH|209;	2
SteCoe_22647	zinc finger transcription factor	zf-C2H2 domain protein	blastp_trinity:ZNF32_MOUSE|160;	pfam:ZNF32_MOUSE|160;	2
SteCoe_32173	hypothetical protein	hypothetical protein	blastp_trinity:NA	pfam:	2
SteCoe_26634	hypothetical protein	zf-LITAF-like domain protein	blastp_trinity:NA	pfam:	2
SteCoe_21185	hypothetical protein	JmjC domain protein	blastp_trinity:UTY_HUMAN|134;	pfam:UTY_HUMAN|134;	2
SteCoe_24892	hypothetical protein	hypothetical protein	blastp_trinity:NA	pfam:	2
SteCoe_31074	RNA recognition motif	hypothetical protein	blastp_trinity:SYC_SYNJB|53.1;	pfam:SYC_SYNJB|53.1;	2
SteCoe_20533	Zinc carboxypeptidase	Peptidase_M14 domain protein	blastp_trinity:CBPC2_MACFA|286;	pfam:CBPC2_MACFA|286;	2
SteCoe_7888	hypothetical protein	hypothetical protein	blastp_trinity:NA	pfam:	2
SteCoe_17739	hypothetical protein	hypothetical protein	blastp_trinity:NA	pfam:	2
SteCoe_11152	glycosyl hydrolase	Glyco_hydro_16 domain protein	blastp_trinity:BGBP_PENMO|331;	pfam:BGBP_PENMO|331;	2
SteCoe_25888	E3 UBIQUITIN-PROTEIN LIGASE	zf-RING_2 domain protein	blastp_trinity:TRI72_XENLA|67.0;	pfam:TRI72_XENLA|67.0;	2
SteCoe_2799	RCC1	RCC1 domain protein	blastp_trinity:HERC2_HUMAN|67.4;	pfam:HERC2_HUMAN|67.4;	2
SteCoe_2810	KELCH repeat protein	Kelch_4 domain protein	blastp_trinity:TEA1_SCHPO|60.5;	pfam:TEA1_SCHPO|60.5;	2
SteCoe_6901	hypothetical protein	zf-B_box domain protein	blastp_trinity:NA	pfam:	2
SteCoe_11102	FAP52 (MIP)	hypothetical protein	blastp_trinity:CFA52_CHLRE|247;	pfam:CFA52_CHLRE|247;	2
SteCoe_32586	FAP22	hypothetical protein	blastp_trinity:CLUA1_MOUSE|272;	pfam:CLUA1_MOUSE|272;	2
SteCoe_6704	hypothetical protein	hypothetical protein	blastp_trinity:NA	pfam:	2
SteCoe_33650	14-3-3 protein	hypothetical protein	blastp_trinity:14338_ARATH|271;	pfam:14338_ARATH|271;	2
SteCoe_10145	hypothetical protein	hypothetical protein	blastp_trinity:NA	pfam:	2
SteCoe_373	hypothetical protein	hypothetical protein	blastp_trinity:NA	pfam:	2
SteCoe_26166	PLD like domain protein	PLDc_2 domain protein	blastp_trinity:PLD6_CHLRE|119;	pfam:PLD6_CHLRE|119;	2
SteCoe_3116	calcineurin-like phosphoesterase	Metallophos domain protein	blastp_trinity:PP2B2_DROME|413;	pfam:PP2B2_DROME|413;	2
SteCoe_11769	CDK family kinase	kinase related to cdc2 subfamily	blastp_trinity:CDK1_BOVIN|383;	pfam:CDK1_BOVIN|383;	2
SteCoe_4577	PKG family kinase	PKG family kinase	blastp_trinity:EGL4_CAEEL|70.1;	pfam:EGL4_CAEEL|70.1;	2
SteCoe_8279	hypothetical protein	hypothetical protein	blastp_trinity:SETD3_CALJA|72.8;	pfam:SETD3_CALJA|72.8;	2
SteCoe_10141	Vacuolar Sorting Receptor	PA domain protein	blastp_trinity:VSR7_ARATH|167;	pfam:VSR7_ARATH|167;	2
SteCoe_20641	Glycosyl hydrolase	Glyco_hydro_16 domain protein	blastp_trinity:BGBP_PENMO|327;	pfam:BGBP_PENMO|327;	2
SteCoe_11626	Oxidoreductase molybdopterin binding domain	Cyt-b5 domain protein	blastp_trinity:SUOX_DROME|395;	pfam:SUOX_DROME|395;	2
SteCoe_4927	hypothetical protein	DOT1 domain protein	blastp_trinity:NA	pfam:	2
SteCoe_36028	PHOSPHATIDYLINOSITOL-4-PHOSPHATE 5-KINASE	hypothetical protein	blastp_trinity:PI5K8_ARATH|85.9;	pfam:PI5K8_ARATH|85.9;	2
SteCoe_36365	hypothetical protein	hypothetical protein	blastp_trinity:NA	pfam:	2
SteCoe_1735	hypothetical protein	hypothetical protein	blastp_trinity:NA	pfam:	2
SteCoe_33485	hypothetical protein	hypothetical protein	blastp_trinity:NA	pfam:	2
SteCoe_36851	hypothetical protein	hypothetical protein	blastp_trinity:NA	pfam:	2
SteCoe_15414	hypothetical protein	zf-LITAF-like domain protein	blastp_trinity:NA	pfam:	2
SteCoe_36686	PHOSPHATIDYLINOSITOL-4-PHOSPHATE 5-KINASE	IQ domain protein	blastp_trinity:PI5K4_ARATH|97.1;	pfam:PI5K4_ARATH|97.1;	2
SteCoe_32460	EF hand 7 protein	EF-hand_7 domain protein	blastp_trinity:CALM2_PETHY|140;	pfam:CALM2_PETHY|140;	2
SteCoe_21751	Glycosyl hydrolase	Glyco_hydro_16 domain protein	blastp_trinity:E13B_BACCI|106;	pfam:E13B_BACCI|106;	2
SteCoe_18615	ODA1 outer arm docking complex	hypothetical protein	blastp_trinity:ODA1_CHLRE|303;	pfam:ODA1_CHLRE|303;	2
SteCoe_22497	WD40 domain protein	WD40 domain protein	blastp_trinity:MABP1_MOUSE|434;	pfam:MABP1_MOUSE|434;	2
SteCoe_10891	SET domain protein	zf-HC5HC2H_2 domain protein	blastp_trinity:ATXR3_ARATH|254;	pfam:ATXR3_ARATH|254;	2
SteCoe_4184	hypothetical protein	hypothetical protein	blastp_trinity:NA	pfam:	2
SteCoe_13392	cyclin	Cyclin	blastp_trinity:CCNE1_RAT|110;	pfam:CCNE1_RAT|110;	2
SteCoe_32369	Ras family protein	Ras domain protein	blastp_trinity:RBL2A_PONAB|214;	pfam:RBL2A_PONAB|214;	2
SteCoe_10062	PKD channel protein	PKD_channel domain protein	blastp_trinity:PKD2_DANRE|84.0;	pfam:PKD2_DANRE|84.0;	2
SteCoe_38362	RSP7 radial spoke protein	RIIa domain protein	blastp_trinity:SP17_HUMAN|51.2;	pfam:SP17_HUMAN|51.2;	2
SteCoe_13571	Protein phosphatase 2C	PP2C domain protein	blastp_trinity:PP2C1_YEAST|145;	pfam:PP2C1_YEAST|145;	2
SteCoe_24016	STE11 family kinase	STE11 family kinase	blastp_trinity:NPK1_TOBAC|293;	pfam:NPK1_TOBAC|293;	2
SteCoe_10731		hypothetical protein			2
SteCoe_11373		hypothetical protein			2
SteCoe_13070		hypothetical protein			2
SteCoe_13786		hypothetical protein			2
SteCoe_14484		Hep_59 domain protein			2
SteCoe_19334		C2 domain protein			2
SteCoe_19902		hypothetical protein			2
SteCoe_20465		hypothetical protein			2
SteCoe_20752		ArfGap domain protein			2
SteCoe_20909		hypothetical protein			2
SteCoe_21843		hypothetical protein			2
SteCoe_21853		Alpha family kinase			2
SteCoe_21857		hypothetical protein			2
SteCoe_22114		SHIPPO-rpt domain protein			2
SteCoe_22849		WD40 domain protein			2
SteCoe_23051		hypothetical protein			2
SteCoe_23707		hypothetical protein			2
SteCoe_24217		Ank_2 domain protein			2
SteCoe_25313		Histone domain protein			2
SteCoe_25503		hypothetical protein			2
SteCoe_26052		Citrate_synt domain protein			2
SteCoe_26620		hypothetical protein			2
SteCoe_2687		hypothetical protein			2
SteCoe_27474		XPG_N domain protein			2
SteCoe_27881		hypothetical protein			2
SteCoe_28149		hypothetical protein			2
SteCoe_28515		hypothetical protein			2
SteCoe_29233		Peptidase_M8 domain protein			2
SteCoe_29933		hypothetical protein			2
SteCoe_31865		zf-C3HC4_3 domain protein			2
SteCoe_33047		hypothetical protein			2
SteCoe_34576		DYRK family kinase			2
SteCoe_3532		cNMP_binding domain protein			2
SteCoe_35680		hypothetical protein			2
SteCoe_3589		E2F_TDP domain protein			2
SteCoe_37662		Peptidase_S28 domain protein			2
SteCoe_38697		hypothetical protein			2
SteCoe_5983		Ion_trans domain protein			2
SteCoe_6192		Anoctamin domain protein			2
SteCoe_7236		STPPase_N domain protein			2
SteCoe_7872		hypothetical protein			2
SteCoe_9043		Abhydrolase_1 domain protein			2
SteCoe_9775		Pur_ac_phosph_N domain protein			2
SteCoe_14364	Glutathione S-transferase	GST_N domain protein	blastp_trinity:GST_NOTSL|107;	pfam:GST_NOTSL|107;	3
SteCoe_24086	Phosphatidylinositol-specific phospholipase C	EF-hand_7 domain protein	blastp_trinity:PLD3A_DANRE|312;	pfam:PLD3A_DANRE|312;	3
SteCoe_9744	Cystathionine beta-synthase	PALP domain protein	blastp_trinity:CBS_HUMAN|416;	pfam:CBS_HUMAN|416;	3
SteCoe_27551	hypothetical protein	hypothetical protein	blastp_trinity:NA	pfam:	3
SteCoe_32974	Citrate synthase	hypothetical protein	blastp_trinity:CISY1_RHITR|503;	pfam:CISY1_RHITR|503;	3
SteCoe_19497	hypothetical protein	hypothetical protein	blastp_trinity:NA	pfam:	3
SteCoe_28929	hypothetical protein	hypothetical protein	blastp_trinity:NA	pfam:	3
SteCoe_7327	hypothetical protein	START domain protein	blastp_trinity:NA	pfam:	3
SteCoe_27513	nucleoporin	Nucleoporin2 domain protein	blastp_trinity:NU98B_ARATH|75.1;	pfam:NU98B_ARATH|75.1;	3
SteCoe_18142	SHIPPO-rpt domain protein	SHIPPO-rpt domain protein	blastp_trinity:ODF3B_MOUSE|53.1;	pfam:ODF3B_MOUSE|53.1;	3
SteCoe_8354	AMP-binding enzyme	AMP-binding domain protein	blastp_trinity:ACSL5_HUMAN|233;	pfam:ACSL5_HUMAN|233;	3
SteCoe_15958	CDK family kinase	CDK family kinase	blastp_trinity:CDK1_CANAL|287;	pfam:CDK1_CANAL|287;	3
SteCoe_26614	hypothetical protein	hypothetical protein	blastp_trinity:NA	pfam:	3
SteCoe_9060	hypothetical protein	hypothetical protein	blastp_trinity:NA	pfam:	3
SteCoe_16790	hypothetical protein	hypothetical protein	blastp_trinity:FAZ1_TRYB2|67.8;	pfam:NA	3
SteCoe_17404	cNMP_binding domain protein	cNMP_binding domain protein	blastp_trinity:KAPR_KLULA|63.9;	pfam:KAPR_KLULA|63.9;	3
SteCoe_14474	hypothetical protein	hypothetical protein	blastp_trinity:NA	pfam:	3
SteCoe_28099	hypothetical protein	hypothetical protein	blastp_trinity:NA	pfam:	3
SteCoe_28236	hypothetical protein	hypothetical protein	blastp_trinity:RPGR_HUMAN|58.9;	pfam:RPGR_HUMAN|58.9;	3
SteCoe_3167	hypothetical protein	hypothetical protein	blastp_trinity:NA	pfam:	3
SteCoe_18191	CDPK family kinase	CDPK family kinase	blastp_trinity:CDPK2_PLAFK|310;	pfam:CDPK2_PLAFK|310;	3
SteCoe_11162	KELCH repeat protein	Kelch_3 domain protein	blastp_trinity:TEA1_SCHPO|106;	pfam:TEA1_SCHPO|106;	3
SteCoe_30696	Ammonium Transporter	Ammonium_transp domain protein	blastp_trinity:AMT2_DICDI|99.8;	pfam:AMT2_DICDI|99.8;	3
SteCoe_13881	hypothetical protein	hypothetical protein	blastp_trinity:NA	pfam:	3
SteCoe_15679	Calcium-activated chloride channel	Anoctamin domain protein	blastp_trinity:ANO10_HUMAN|192;	pfam:ANO10_HUMAN|192;	3
SteCoe_15061	Coenzyme A transferase	CoA_trans domain protein	blastp_trinity:SCOT1_RAT|390;	pfam:SCOT1_RAT|390;	3
SteCoe_11394	hypothetical protein	hypothetical protein	blastp_trinity:PLCX2_MOUSE|80.9;	pfam:PLCX2_MOUSE|80.9;	3
SteCoe_26413	kinesin family member	Kinesin domain protein	blastp_trinity:KIF1A_DROPS|485;	pfam:KIF1A_DROPS|485;	3
SteCoe_32046	hypothetical protein	hypothetical protein	blastp_trinity:NA	pfam:	3
SteCoe_5295	Ubiquitin carboxyl-terminal hydrolase	DUSP domain protein	blastp_trinity:UBP5_ARATH|91.7;	pfam:UBP5_ARATH|91.7;	3
SteCoe_26635	ubulin-tyrosine ligase	TTL domain protein	blastp_trinity:TTLL5_MOUSE|290;	pfam:TTLL5_MOUSE|290;	3
SteCoe_29283	hypothetical protein	hypothetical protein	blastp_trinity:NA	pfam:	3
SteCoe_3193	dual specificity phosphatase	DSPc domain protein	blastp_trinity:PTPC1_BOVIN|211;	pfam:PTPC1_BOVIN|211;	3
SteCoe_33829	protein phosphatase 2C	hypothetical protein	blastp_trinity:P2C48_ORYSJ|123;	pfam:P2C48_ORYSJ|123;	3
SteCoe_33168	glutathione S-transferase	hypothetical protein	blastp_trinity:GSTT1_ARATH|139;	pfam:GSTT1_ARATH|139;	3
SteCoe_21768	cyclic nucleotide-binding protein	cNMP_binding domain protein	blastp_trinity:KAPR_BLAEM|242;	pfam:KAPR_BLAEM|242;	3
SteCoe_12505	Amidohydro_1 domain protein	Amidohydro_1 domain protein	blastp_trinity:ALN_ARATH|141;	pfam:ALN_ARATH|141;	3
SteCoe_32337	hypothetical protein	hypothetical protein	blastp_trinity:NA	pfam:	3
SteCoe_3260	hypothetical protein	hypothetical protein	blastp_trinity:NA	pfam:	3
SteCoe_6054	hypothetical protein	hypothetical protein	blastp_trinity:NA	pfam:	3
SteCoe_7175	hypothetical protein	hypothetical protein	blastp_trinity:NA	pfam:	3
SteCoe_13508	RNA recognition motif	RRM_1 domain protein	blastp_trinity:PABP8_ARATH|61.6;	pfam:PABP8_ARATH|61.6;	3
SteCoe_32022	CRAL/TRIO domain	CRAL_TRIO domain protein	blastp_trinity:YJX4_SCHPO|85.5;	pfam:YJX4_SCHPO|85.5;	3
SteCoe_15570	eIF4 gamma	MIF4G domain protein	blastp_trinity:IF4G2_WHEAT|111;	pfam:IF4G2_WHEAT|111;	3
SteCoe_16088	hypothetical protein	VPS9 domain protein	blastp_trinity:NA	pfam:	3
SteCoe_32773	MOT6 Ef hand protein	hypothetical protein	blastp_trinity:CAPSL_MOUSE|152;	pfam:CAPSL_MOUSE|152;	3
SteCoe_19710	KELCH repeat protein	Kelch_5 domain protein	blastp_trinity:LZTR1_PONAB|84.7;	pfam:LZTR1_PONAB|84.7;	3
SteCoe_5099	CDPK family kinase	CDPK family kinase	blastp_trinity:CDPK2_PLAFK|363;	pfam:CDPK2_PLAFK|363;	3
SteCoe_36239	hypothetical protein	hypothetical protein	blastp_trinity:NA	pfam:	3
SteCoe_1086	kinesin family member	Kinesin domain protein	blastp_trinity:KIF9_MOUSE|494;	pfam:KIF9_MOUSE|494;	3
SteCoe_13456	REJ domain protein	REJ domain protein	blastp_trinity:FRAS1_HUMAN|66.2;	pfam:FRAS1_HUMAN|66.2;	3
SteCoe_30920	MORN repeat protein	MORN domain protein	blastp_trinity:RSPH1_MOUSE|60.5;	pfam:RSPH1_MOUSE|60.5;	3
SteCoe_9703	FAP78	hypothetical protein	blastp_trinity:LR74A_HUMAN|54.7;	pfam:LR74A_HUMAN|54.7;	3
SteCoe_26367	Zinc carboxypeptidase	Peptidase_M14 domain protein	blastp_trinity:CBPC3_HUMAN|426;	pfam:CBPC3_HUMAN|426;	3
SteCoe_3836	hypothetical protein	hypothetical protein	blastp_trinity:NA	pfam:	3
SteCoe_35349	hypothetical protein	hypothetical protein	blastp_trinity:NA	pfam:	3
SteCoe_11417	hypothetical protein	hypothetical protein	blastp_trinity:NA	pfam:	3
SteCoe_25360	Bystin family protein	Bystin domain protein	blastp_trinity:BYST_NEMVE|270;	pfam:BYST_NEMVE|270;	3
SteCoe_603	sugar transporter	Sugar_tr domain protein	blastp_trinity:CSBC_BACSU|167;	pfam:CSBC_BACSU|167;	3
SteCoe_9843	hypothetical protein	hypothetical protein	blastp_trinity:NA	pfam:	3
SteCoe_11623	TOG1 microtubule associated protein	CLASP_N domain protein	blastp_trinity:CKAP5_HUMAN|513;	pfam:CKAP5_HUMAN|513;	3
SteCoe_32071	Alcohol dehydrogenase	ADH_N domain protein	blastp_trinity:MECR_ARATH|100;	pfam:MECR_ARATH|100;	3
SteCoe_37173	hypothetical protein	DUF667 domain protein	blastp_trinity:CC067_MOUSE|78.2;	pfam:CC067_MOUSE|78.2;	3
SteCoe_22861	hypothetical protein	hypothetical protein	blastp_trinity:NA	pfam:	3
SteCoe_10625		hypothetical protein			3
SteCoe_1404		hypothetical protein			3
SteCoe_14869		hypothetical protein			3
SteCoe_16027		hypothetical protein			3
SteCoe_18126		AAA domain protein			3
SteCoe_18821		CoA_trans domain protein			3
SteCoe_20672		hypothetical protein			3
SteCoe_21012		Kinesin domain protein			3
SteCoe_22731		PhyH domain protein			3
SteCoe_2456		hypothetical protein			3
SteCoe_24584		WD40 domain protein			3
SteCoe_25482		zf-C3HC4_2 domain protein			3
SteCoe_26523		Peptidase_S10 domain protein			3
SteCoe_26909		NIF domain protein			3
SteCoe_27310		hypothetical protein			3
SteCoe_28590		MORN domain protein			3
SteCoe_28758		hypothetical protein			3
SteCoe_28983		hypothetical protein			3
SteCoe_3064		hypothetical protein			3
SteCoe_30711		hypothetical protein			3
SteCoe_31930		Mito_carr domain protein			3
SteCoe_32057		hypothetical protein			3
SteCoe_3276		GAF domain protein			3
SteCoe_33440		hypothetical protein			3
SteCoe_35241		hypothetical protein			3
SteCoe_36440		hypothetical protein			3
SteCoe_37772		hypothetical protein			3
SteCoe_37793		hypothetical protein			3
SteCoe_4732		hypothetical protein			3
SteCoe_5162		Nucleoporin2 domain protein			3
SteCoe_6197		hypothetical protein			3
SteCoe_6768		MCM_N domain protein			3
SteCoe_6894		GAF domain protein			3
SteCoe_7199		WD40 domain protein			3
SteCoe_7610		hypothetical protein			3
