# Supplementary material for: Modular, cascade-like transcriptional program of regeneration in Stentor
Source: eLife. 2022 Aug 4;11:e80778. doi: 10.7554/eLife.80778 (PMC9371601; doi:10.7554/eLife.80778)
Supplement: Supplementary file 4. [file elife-80778-supp4.xlsx]

## Sheet: Sheet1
gene	annotation	blastp_trinity	pfam	blastp_anc_centriole_genes	blastp_cell_cycle	blastp_chrom_mod	blastp_chrom_remod	blastp_RBPDB	blastp_RNA_Binding	NA	clustMem	ClusterPlotOrder	pre_vals
SteCoe_10203		blastp_trinity:ATAD3_XENTR|441;	pfam:ATAD3_XENTR|441;	blastp_anc_centriole_genes:NA	blastp_cell_cycle:ATAD3_XENTR|441;	blastp_chrom_mod:ATAD3_XENTR|441;	blastp_chrom_remod:ATAD3_XENTR|441;	blastp_RBPDB:NA	blastp_RNA_Binding:ATAD3_XENTR|441;	NA	1	1	28.1494
SteCoe_10330		blastp_trinity:NA	pfam:	blastp_anc_centriole_genes:NA	blastp_cell_cycle:NA	blastp_chrom_mod:NA	blastp_chrom_remod:NA	blastp_RBPDB:NA	blastp_RNA_Binding:NA	NA	1	1	38.3216
SteCoe_10917		blastp_trinity:COLL6_MIMIV|58.5;	pfam:COLL6_MIMIV|58.5;	blastp_anc_centriole_genes:NA	blastp_cell_cycle:NA	blastp_chrom_mod:NA	blastp_chrom_remod:NA	blastp_RBPDB:NA	blastp_RNA_Binding:COLL6_MIMIV|58.5;	NA	1	1	12.1059
SteCoe_11144		blastp_trinity:GSTT1_MOUSE|117;	pfam:GSTT1_MOUSE|117;	blastp_anc_centriole_genes:NA	blastp_cell_cycle:GSTT1_MOUSE|117;	blastp_chrom_mod:NA	blastp_chrom_remod:NA	blastp_RBPDB:NA	blastp_RNA_Binding:NA	NA	1	1	10.746
SteCoe_11579		blastp_trinity:NA	pfam:	blastp_anc_centriole_genes:NA	blastp_cell_cycle:NA	blastp_chrom_mod:NA	blastp_chrom_remod:NA	blastp_RBPDB:NA	blastp_RNA_Binding:NA	NA	1	1	163.972
SteCoe_11860		blastp_trinity:NA	pfam:	blastp_anc_centriole_genes:NA	blastp_cell_cycle:NA	blastp_chrom_mod:NA	blastp_chrom_remod:NA	blastp_RBPDB:NA	blastp_RNA_Binding:NA	NA	1	1	8.50615
SteCoe_12040		blastp_trinity:RHP23_SCHPO|58.9;	pfam:RHP23_SCHPO|58.9;	blastp_anc_centriole_genes:NA	blastp_cell_cycle:NA	blastp_chrom_mod:NA	blastp_chrom_remod:NA	blastp_RBPDB:NA	blastp_RNA_Binding:NA	NA	1	1	10.9155
SteCoe_12575		blastp_trinity:MEMO1_DANRE|251;	pfam:MEMO1_DANRE|251;	blastp_anc_centriole_genes:NA	blastp_cell_cycle:NA	blastp_chrom_mod:NA	blastp_chrom_remod:NA	blastp_RBPDB:NA	blastp_RNA_Binding:NA	NA	1	1	7.80085
SteCoe_13600	SFI1	blastp_trinity:HSF24_SOLPE|90.1;	pfam:HSF24_SOLPE|90.1;	blastp_anc_centriole_genes:HSF24_SOLPE|90.1;	blastp_cell_cycle:HSF24_SOLPE|90.1;	blastp_chrom_mod:HSF24_SOLPE|90.1;	blastp_chrom_remod:NA	blastp_RBPDB:NA	blastp_RNA_Binding:NA	NA	1	1	1.96014
SteCoe_13946		blastp_trinity:AGFG1_RAT|107;	pfam:AGFG1_RAT|107;	blastp_anc_centriole_genes:NA	blastp_cell_cycle:NA	blastp_chrom_mod:NA	blastp_chrom_remod:NA	blastp_RBPDB:NA	blastp_RNA_Binding:NA	NA	1	1	29.4829
SteCoe_13956		blastp_trinity:NT5D1_HUMAN|99.8;	pfam:NT5D1_HUMAN|99.8;	blastp_anc_centriole_genes:NA	blastp_cell_cycle:NA	blastp_chrom_mod:NA	blastp_chrom_remod:NA	blastp_RBPDB:NA	blastp_RNA_Binding:NA	NA	1	1	15.1979
SteCoe_14893		blastp_trinity:CKB1_CAEEL|63.2;	pfam:CKB1_CAEEL|63.2;	blastp_anc_centriole_genes:NA	blastp_cell_cycle:NA	blastp_chrom_mod:NA	blastp_chrom_remod:NA	blastp_RBPDB:NA	blastp_RNA_Binding:NA	NA	1	1	94.8677
SteCoe_1546		blastp_trinity:SCP50_ARATH|176;	pfam:SCP50_ARATH|176;	blastp_anc_centriole_genes:NA	blastp_cell_cycle:NA	blastp_chrom_mod:NA	blastp_chrom_remod:NA	blastp_RBPDB:NA	blastp_RNA_Binding:NA	NA	1	1	20.5149
SteCoe_1617		blastp_trinity:NA	pfam:	blastp_anc_centriole_genes:NA	blastp_cell_cycle:NA	blastp_chrom_mod:NA	blastp_chrom_remod:NA	blastp_RBPDB:NA	blastp_RNA_Binding:NA	NA	1	1	0.843179
SteCoe_16538		blastp_trinity:PPIB_DICDI|201;	pfam:PPIB_DICDI|201;	blastp_anc_centriole_genes:NA	blastp_cell_cycle:PPIB_DICDI|201;	blastp_chrom_mod:PPIB_DICDI|201;	blastp_chrom_remod:NA	blastp_RBPDB:PPIB_DICDI|201;	blastp_RNA_Binding:PPIB_DICDI|201;	NA	1	1	17.6937
SteCoe_16665		blastp_trinity:BSCLH_SCHPO|55.8;	pfam:BSCLH_SCHPO|55.8;	blastp_anc_centriole_genes:NA	blastp_cell_cycle:NA	blastp_chrom_mod:NA	blastp_chrom_remod:NA	blastp_RBPDB:NA	blastp_RNA_Binding:NA	NA	1	1	8.31354
SteCoe_16763		blastp_trinity:DNAJ_THEM4|90.9;	pfam:DNAJ_THEM4|90.9;	blastp_anc_centriole_genes:NA	blastp_cell_cycle:NA	blastp_chrom_mod:NA	blastp_chrom_remod:NA	blastp_RBPDB:NA	blastp_RNA_Binding:DNAJ_THEM4|90.9;	NA	1	1	18.3031
SteCoe_18114		blastp_trinity:NA	pfam:	blastp_anc_centriole_genes:NA	blastp_cell_cycle:NA	blastp_chrom_mod:NA	blastp_chrom_remod:NA	blastp_RBPDB:NA	blastp_RNA_Binding:NA	NA	1	1	53.0836
SteCoe_18970		blastp_trinity:SYFM_ARATH|365;	pfam:SYFM_ARATH|365;	blastp_anc_centriole_genes:NA	blastp_cell_cycle:NA	blastp_chrom_mod:NA	blastp_chrom_remod:NA	blastp_RBPDB:NA	blastp_RNA_Binding:SYFM_ARATH|365;	NA	1	1	16.4646
SteCoe_19555		blastp_trinity:NA	pfam:	blastp_anc_centriole_genes:NA	blastp_cell_cycle:NA	blastp_chrom_mod:NA	blastp_chrom_remod:NA	blastp_RBPDB:NA	blastp_RNA_Binding:NA	NA	1	1	25.6964
SteCoe_20619		blastp_trinity:BPI_HUMAN|55.5;	pfam:BPI_HUMAN|55.5;	blastp_anc_centriole_genes:NA	blastp_cell_cycle:NA	blastp_chrom_mod:NA	blastp_chrom_remod:NA	blastp_RBPDB:NA	blastp_RNA_Binding:NA	NA	1	1	33.6663
SteCoe_23059		blastp_trinity:NA	pfam:	blastp_anc_centriole_genes:NA	blastp_cell_cycle:NA	blastp_chrom_mod:NA	blastp_chrom_remod:NA	blastp_RBPDB:NA	blastp_RNA_Binding:NA	NA	1	1	65.8317
SteCoe_23131		blastp_trinity:ANKR1_CHICK|68.2;	pfam:ANKR1_CHICK|68.2;	blastp_anc_centriole_genes:NA	blastp_cell_cycle:ANKR1_CHICK|68.2;	blastp_chrom_mod:ANKR1_CHICK|68.2;	blastp_chrom_remod:NA	blastp_RBPDB:ANKR1_CHICK|68.2;	blastp_RNA_Binding:NA	NA	1	1	17.4598
SteCoe_23664		blastp_trinity:PI5K8_ARATH|107;	pfam:PI5K8_ARATH|107;	blastp_anc_centriole_genes:PI5K8_ARATH|107;	blastp_cell_cycle:NA	blastp_chrom_mod:PI5K8_ARATH|107;	blastp_chrom_remod:NA	blastp_RBPDB:NA	blastp_RNA_Binding:NA	NA	1	1	1.2191
SteCoe_23725		blastp_trinity:TRPT1_DANRE|162;	pfam:TRPT1_DANRE|162;	blastp_anc_centriole_genes:NA	blastp_cell_cycle:TRPT1_DANRE|162;	blastp_chrom_mod:NA	blastp_chrom_remod:NA	blastp_RBPDB:NA	blastp_RNA_Binding:TRPT1_DANRE|162;	NA	1	1	15.6816
SteCoe_24295		blastp_trinity:UBI2P_PETCR|876;	pfam:UBI2P_PETCR|876;	blastp_anc_centriole_genes:NA	blastp_cell_cycle:UBI2P_PETCR|876;	blastp_chrom_mod:NA	blastp_chrom_remod:NA	blastp_RBPDB:NA	blastp_RNA_Binding:UBI2P_PETCR|876;	NA	1	1	294.14
SteCoe_25263		blastp_trinity:KGP2_HUMAN|116;	pfam:KGP2_HUMAN|116;	blastp_anc_centriole_genes:KGP2_HUMAN|116;	blastp_cell_cycle:KGP2_HUMAN|116;	blastp_chrom_mod:KGP2_HUMAN|116;	blastp_chrom_remod:KGP2_HUMAN|116;	blastp_RBPDB:KGP2_HUMAN|116;	blastp_RNA_Binding:KGP2_HUMAN|116;	NA	1	1	23.8953
SteCoe_26107		blastp_trinity:CKI1_ORYSJ|405;	pfam:CKI1_ORYSJ|405;	blastp_anc_centriole_genes:NA	blastp_cell_cycle:CKI1_ORYSJ|405;	blastp_chrom_mod:CKI1_ORYSJ|405;	blastp_chrom_remod:CKI1_ORYSJ|405;	blastp_RBPDB:NA	blastp_RNA_Binding:CKI1_ORYSJ|405;	NA	1	1	5.8766
SteCoe_26519		blastp_trinity:VWA5A_RAT|189;	pfam:VWA5A_RAT|189;	blastp_anc_centriole_genes:NA	blastp_cell_cycle:NA	blastp_chrom_mod:NA	blastp_chrom_remod:NA	blastp_RBPDB:NA	blastp_RNA_Binding:NA	NA	1	1	6.33994
SteCoe_27052		blastp_trinity:MS5L2_ARATH|59.7;	pfam:MS5L2_ARATH|59.7;	blastp_anc_centriole_genes:NA	blastp_cell_cycle:NA	blastp_chrom_mod:NA	blastp_chrom_remod:NA	blastp_RBPDB:NA	blastp_RNA_Binding:NA	NA	1	1	33.8943
SteCoe_27409		blastp_trinity:CH62_MAIZE|683;	pfam:CH62_MAIZE|683;	blastp_anc_centriole_genes:NA	blastp_cell_cycle:CH62_MAIZE|683;	blastp_chrom_mod:NA	blastp_chrom_remod:NA	blastp_RBPDB:NA	blastp_RNA_Binding:CH62_MAIZE|683;	NA	1	1	429.436
SteCoe_28000		blastp_trinity:F16P2_BRANA|390;	pfam:F16P2_BRANA|390;	blastp_anc_centriole_genes:NA	blastp_cell_cycle:NA	blastp_chrom_mod:NA	blastp_chrom_remod:NA	blastp_RBPDB:NA	blastp_RNA_Binding:NA	NA	1	1	5.65584
SteCoe_29862		blastp_trinity:ACSF3_XENLA|402;	pfam:ACSF3_XENLA|402;	blastp_anc_centriole_genes:NA	blastp_cell_cycle:NA	blastp_chrom_mod:ACSF3_XENLA|402;	blastp_chrom_remod:NA	blastp_RBPDB:NA	blastp_RNA_Binding:ACSF3_XENLA|402;	NA	1	1	10.1128
SteCoe_29888		blastp_trinity:ERF3_OGAPI|104;	pfam:ERF3_OGAPI|104;	blastp_anc_centriole_genes:NA	blastp_cell_cycle:NA	blastp_chrom_mod:NA	blastp_chrom_remod:NA	blastp_RBPDB:NA	blastp_RNA_Binding:ERF3_OGAPI|104;	NA	1	1	11.2408
SteCoe_30146		blastp_trinity:NA	pfam:	blastp_anc_centriole_genes:NA	blastp_cell_cycle:NA	blastp_chrom_mod:NA	blastp_chrom_remod:NA	blastp_RBPDB:NA	blastp_RNA_Binding:NA	NA	1	1	9.27564
SteCoe_30646		blastp_trinity:H2AX_PICAB|189;	pfam:H2AX_PICAB|189;	blastp_anc_centriole_genes:NA	blastp_cell_cycle:H2AX_PICAB|189;	blastp_chrom_mod:H2AX_PICAB|189;	blastp_chrom_remod:H2AX_PICAB|189;	blastp_RBPDB:NA	blastp_RNA_Binding:NA	NA	1	1	590.899
SteCoe_3140		blastp_trinity:NA	pfam:	blastp_anc_centriole_genes:NA	blastp_cell_cycle:NA	blastp_chrom_mod:NA	blastp_chrom_remod:NA	blastp_RBPDB:NA	blastp_RNA_Binding:NA	NA	1	1	5.75888
SteCoe_31502		blastp_trinity:SUA5_PYRAB|181;	pfam:SUA5_PYRAB|181;	blastp_anc_centriole_genes:NA	blastp_cell_cycle:NA	blastp_chrom_mod:NA	blastp_chrom_remod:NA	blastp_RBPDB:NA	blastp_RNA_Binding:SUA5_PYRAB|181;	NA	1	1	11.24
SteCoe_32476		blastp_trinity:GLRX5_MOUSE|129;	pfam:GLRX5_MOUSE|129;	blastp_anc_centriole_genes:NA	blastp_cell_cycle:NA	blastp_chrom_mod:NA	blastp_chrom_remod:NA	blastp_RBPDB:NA	blastp_RNA_Binding:GLRX5_MOUSE|129;	NA	1	1	33.4635
SteCoe_32642		blastp_trinity:DDC_HUMAN|338;	pfam:DDC_HUMAN|338;	blastp_anc_centriole_genes:NA	blastp_cell_cycle:NA	blastp_chrom_mod:NA	blastp_chrom_remod:NA	blastp_RBPDB:NA	blastp_RNA_Binding:NA	NA	1	1	4.35092
SteCoe_32660		blastp_trinity:GSTO2_CAEEL|67.8;	pfam:GSTO2_CAEEL|67.8;	blastp_anc_centriole_genes:NA	blastp_cell_cycle:NA	blastp_chrom_mod:NA	blastp_chrom_remod:NA	blastp_RBPDB:NA	blastp_RNA_Binding:NA	NA	1	1	408.462
SteCoe_32770		blastp_trinity:NA	pfam:	blastp_anc_centriole_genes:NA	blastp_cell_cycle:NA	blastp_chrom_mod:NA	blastp_chrom_remod:NA	blastp_RBPDB:NA	blastp_RNA_Binding:NA	NA	1	1	12.6919
SteCoe_34264		blastp_trinity:NA	pfam:	blastp_anc_centriole_genes:NA	blastp_cell_cycle:NA	blastp_chrom_mod:NA	blastp_chrom_remod:NA	blastp_RBPDB:NA	blastp_RNA_Binding:NA	NA	1	1	48.7847
SteCoe_34830		blastp_trinity:RB_MOUSE|75.9;	pfam:RB_MOUSE|75.9;	blastp_anc_centriole_genes:NA	blastp_cell_cycle:RB_MOUSE|75.9;	blastp_chrom_mod:NA	blastp_chrom_remod:NA	blastp_RBPDB:NA	blastp_RNA_Binding:NA	NA	1	1	4.04785
SteCoe_35976		blastp_trinity:RL40_TETTS|75.9;	pfam:RL40_TETTS|75.9;	blastp_anc_centriole_genes:NA	blastp_cell_cycle:RL40_TETTS|75.9;	blastp_chrom_mod:NA	blastp_chrom_remod:NA	blastp_RBPDB:NA	blastp_RNA_Binding:RL40_TETTS|75.9;	NA	1	1	15.8199
SteCoe_36353		blastp_trinity:UBA1_RABIT|807;	pfam:UBA1_RABIT|807;	blastp_anc_centriole_genes:NA	blastp_cell_cycle:UBA1_RABIT|807;	blastp_chrom_mod:NA	blastp_chrom_remod:NA	blastp_RBPDB:NA	blastp_RNA_Binding:UBA1_RABIT|807;	NA	1	1	14.7696
SteCoe_36778		blastp_trinity:ATG8C_ORYSJ|114;	pfam:ATG8C_ORYSJ|114;	blastp_anc_centriole_genes:NA	blastp_cell_cycle:NA	blastp_chrom_mod:NA	blastp_chrom_remod:NA	blastp_RBPDB:NA	blastp_RNA_Binding:NA	NA	1	1	47.4592
SteCoe_37814		blastp_trinity:VWA5A_RAT|193;	pfam:VWA5A_RAT|193;	blastp_anc_centriole_genes:NA	blastp_cell_cycle:NA	blastp_chrom_mod:NA	blastp_chrom_remod:NA	blastp_RBPDB:NA	blastp_RNA_Binding:NA	NA	1	1	14.7484
SteCoe_37895		blastp_trinity:Y2028_DICDI|154;	pfam:Y2028_DICDI|154;	blastp_anc_centriole_genes:NA	blastp_cell_cycle:NA	blastp_chrom_mod:NA	blastp_chrom_remod:NA	blastp_RBPDB:NA	blastp_RNA_Binding:NA	NA	1	1	13.8789
SteCoe_3795		blastp_trinity:H31_CHLRE|180;	pfam:H31_CHLRE|180;	blastp_anc_centriole_genes:NA	blastp_cell_cycle:H31_CHLRE|180;	blastp_chrom_mod:NA	blastp_chrom_remod:NA	blastp_RBPDB:NA	blastp_RNA_Binding:NA	NA	1	1	20.7531
SteCoe_4252		blastp_trinity:BLMP1_CAEEL|50.1;	pfam:BLMP1_CAEEL|50.1;	blastp_anc_centriole_genes:NA	blastp_cell_cycle:NA	blastp_chrom_mod:NA	blastp_chrom_remod:NA	blastp_RBPDB:NA	blastp_RNA_Binding:NA	NA	1	1	2.61907
SteCoe_4469		blastp_trinity:PI5K8_ARATH|103;	pfam:PI5K8_ARATH|103;	blastp_anc_centriole_genes:PI5K8_ARATH|103;	blastp_cell_cycle:NA	blastp_chrom_mod:PI5K8_ARATH|103;	blastp_chrom_remod:NA	blastp_RBPDB:NA	blastp_RNA_Binding:NA	NA	1	1	9.59784
SteCoe_4516		blastp_trinity:SAD2_ARATH|252;	pfam:SAD2_ARATH|252;	blastp_anc_centriole_genes:SAD2_ARATH|252;	blastp_cell_cycle:NA	blastp_chrom_mod:NA	blastp_chrom_remod:NA	blastp_RBPDB:NA	blastp_RNA_Binding:SAD2_ARATH|252;	NA	1	1	92.7149
SteCoe_787		blastp_trinity:MLEC_DANRE|134;	pfam:MLEC_DANRE|134;	blastp_anc_centriole_genes:NA	blastp_cell_cycle:NA	blastp_chrom_mod:NA	blastp_chrom_remod:NA	blastp_RBPDB:NA	blastp_RNA_Binding:NA	NA	1	1	15.401
SteCoe_8269		blastp_trinity:QTRT2_PONAB|117;	pfam:QTRT2_PONAB|117;	blastp_anc_centriole_genes:NA	blastp_cell_cycle:NA	blastp_chrom_mod:NA	blastp_chrom_remod:NA	blastp_RBPDB:NA	blastp_RNA_Binding:NA	NA	1	1	3.82975
SteCoe_8679		blastp_trinity:SRPRA_DICDI|76.3;	pfam:SRPRA_DICDI|76.3;	blastp_anc_centriole_genes:NA	blastp_cell_cycle:NA	blastp_chrom_mod:NA	blastp_chrom_remod:NA	blastp_RBPDB:NA	blastp_RNA_Binding:SRPRA_DICDI|76.3;	NA	1	1	13.2143
SteCoe_9388		blastp_trinity:P2C59_ORYSJ|141;	pfam:P2C59_ORYSJ|141;	blastp_anc_centriole_genes:NA	blastp_cell_cycle:P2C59_ORYSJ|141;	blastp_chrom_mod:P2C59_ORYSJ|141;	blastp_chrom_remod:NA	blastp_RBPDB:NA	blastp_RNA_Binding:NA	NA	1	1	2.17946
SteCoe_9516		blastp_trinity:NA	pfam:	blastp_anc_centriole_genes:NA	blastp_cell_cycle:NA	blastp_chrom_mod:NA	blastp_chrom_remod:NA	blastp_RBPDB:NA	blastp_RNA_Binding:NA	NA	1	1	90.6229
SteCoe_1095	ribosomal dimethyladenosine transferase	blastp_trinity:DIM1_DROME|370;	pfam:DIM1_DROME|370;	blastp_anc_centriole_genes:NA	blastp_cell_cycle:NA	blastp_chrom_mod:NA	blastp_chrom_remod:NA	blastp_RBPDB:NA	blastp_RNA_Binding:DIM1_DROME|370;	NA	2	2	6.30696
SteCoe_11828	hypothetical	blastp_trinity:NA	pfam:	blastp_anc_centriole_genes:NA	blastp_cell_cycle:NA	blastp_chrom_mod:NA	blastp_chrom_remod:NA	blastp_RBPDB:NA	blastp_RNA_Binding:NA	NA	2	2	23.968
SteCoe_13648	hypothetical	blastp_trinity:NA	pfam:	blastp_anc_centriole_genes:NA	blastp_cell_cycle:NA	blastp_chrom_mod:NA	blastp_chrom_remod:NA	blastp_RBPDB:NA	blastp_RNA_Binding:NA	NA	2	2	0.265867
SteCoe_15440	Lipocalin	blastp_trinity:APOD_HUMAN|97.4;	pfam:APOD_HUMAN|97.4;	blastp_anc_centriole_genes:NA	blastp_cell_cycle:NA	blastp_chrom_mod:NA	blastp_chrom_remod:NA	blastp_RBPDB:NA	blastp_RNA_Binding:NA	NA	2	2	18.6727
SteCoe_28615	hypothetical	blastp_trinity:NA	pfam:	blastp_anc_centriole_genes:NA	blastp_cell_cycle:NA	blastp_chrom_mod:NA	blastp_chrom_remod:NA	blastp_RBPDB:NA	blastp_RNA_Binding:NA	NA	2	2	0.0512526
SteCoe_31867	alpha/beta-hydrolase	blastp_trinity:LIPG_MOUSE|234;	pfam:LIPG_MOUSE|234;	blastp_anc_centriole_genes:NA	blastp_cell_cycle:NA	blastp_chrom_mod:NA	blastp_chrom_remod:NA	blastp_RBPDB:NA	blastp_RNA_Binding:NA	NA	2	2	5.28027
SteCoe_3266	centrin family EF hand protein	blastp_trinity:CATR6_PARTE|206;	pfam:CATR6_PARTE|206;	blastp_anc_centriole_genes:CATR6_PARTE|206;	blastp_cell_cycle:CATR6_PARTE|206;	blastp_chrom_mod:NA	blastp_chrom_remod:NA	blastp_RBPDB:NA	blastp_RNA_Binding:CATR6_PARTE|206;	NA	2	2	36.0965
SteCoe_37495	Pumilio family member	blastp_trinity:PUM12_ARATH|149;	pfam:PUM12_ARATH|149;	blastp_anc_centriole_genes:NA	blastp_cell_cycle:PUM12_ARATH|149;	blastp_chrom_mod:PUM12_ARATH|149;	blastp_chrom_remod:NA	blastp_RBPDB:PUM12_ARATH|149;	blastp_RNA_Binding:PUM12_ARATH|149;	NA	2	2	0.499291
SteCoe_435	Ef-hand 7 protein	blastp_trinity:CALM_BLAEM|51.6;	pfam:CALM_BLAEM|51.6;	blastp_anc_centriole_genes:NA	blastp_cell_cycle:CALM_BLAEM|51.6;	blastp_chrom_mod:NA	blastp_chrom_remod:NA	blastp_RBPDB:NA	blastp_RNA_Binding:NA	NA	2	2	1.44275
SteCoe_6321	hypothetical	blastp_trinity:NA	pfam:	blastp_anc_centriole_genes:NA	blastp_cell_cycle:NA	blastp_chrom_mod:NA	blastp_chrom_remod:NA	blastp_RBPDB:NA	blastp_RNA_Binding:NA	NA	2	2	15.8587
SteCoe_8532	ankyrin domain	blastp_trinity:ANKR1_CHICK|75.9;	pfam:ANKR1_CHICK|75.9;	blastp_anc_centriole_genes:ANKR1_CHICK|75.9;	blastp_cell_cycle:ANKR1_CHICK|75.9;	blastp_chrom_mod:ANKR1_CHICK|75.9;	blastp_chrom_remod:NA	blastp_RBPDB:ANKR1_CHICK|75.9;	blastp_RNA_Binding:ANKR1_CHICK|75.9;	NA	2	2	2.00902
SteCoe_9428	centrin family EF hand protein	blastp_trinity:CATR6_PARTE|209;	pfam:CATR6_PARTE|209;	blastp_anc_centriole_genes:CATR6_PARTE|209;	blastp_cell_cycle:CATR6_PARTE|209;	blastp_chrom_mod:NA	blastp_chrom_remod:NA	blastp_RBPDB:NA	blastp_RNA_Binding:CATR6_PARTE|209;	NA	2	2	42.2963
SteCoe_9594	centrin family EF hand protein	blastp_trinity:CATR1_PARTE|238;	pfam:CATR1_PARTE|238;	blastp_anc_centriole_genes:CATR1_PARTE|238;	blastp_cell_cycle:CATR1_PARTE|238;	blastp_chrom_mod:NA	blastp_chrom_remod:NA	blastp_RBPDB:NA	blastp_RNA_Binding:CATR1_PARTE|238;	NA	2	2	44.7756
