# Supplementary material for: Modular, cascade-like transcriptional program of regeneration in Stentor
Source: eLife. 2022 Aug 4;11:e80778. doi: 10.7554/eLife.80778 (PMC9371601; doi:10.7554/eLife.80778)
Supplement: Supplementary file 5. [file elife-80778-supp5.xlsx]

## Sheet: Sheet1
Gene	Manual Annotation	StentorDB_Description	blastp_trinity	pfam	blastp_anc_centriole_genes	blastp_cell_cycle	blastp_chrom_mod	blastp_chrom_remod	blastp_RBPDB	blastp_RNA_Binding	NA	clustMem	ClusterPlotOrder	pre_vals
SteCoe_34106	TCP-1/cpn60 chaperonin family	hypothetical protein	blastp_trinity:CH62_MAIZE|684;	pfam:CH62_MAIZE|684;	blastp_anc_centriole_genes:NA	blastp_cell_cycle:CH62_MAIZE|684;	blastp_chrom_mod:NA	blastp_chrom_remod:NA	blastp_RBPDB:NA	blastp_RNA_Binding:CH62_MAIZE|684;	NA	1	1	278.758
SteCoe_34818	Hsp70 protein	hypothetical protein	blastp_trinity:DNAK_NITWN|852;	pfam:DNAK_NITWN|852;	blastp_anc_centriole_genes:NA	blastp_cell_cycle:DNAK_NITWN|852;	blastp_chrom_mod:NA	blastp_chrom_remod:NA	blastp_RBPDB:NA	blastp_RNA_Binding:DNAK_NITWN|852;	NA	1	1	69.5635
SteCoe_31800	TCP-1/cpn60 chaperonin family	Cpn60_TCP1 domain protein	blastp_trinity:CH62_CUCMA|652;	pfam:CH62_CUCMA|652;	blastp_anc_centriole_genes:NA	blastp_cell_cycle:CH62_CUCMA|652;	blastp_chrom_mod:NA	blastp_chrom_remod:NA	blastp_RBPDB:NA	blastp_RNA_Binding:CH62_CUCMA|652;	NA	1	1	295.606
SteCoe_19424	Hsp90 protein	HATPase_c_3 domain protein	blastp_trinity:TRAP1_BOVIN|466;	pfam:TRAP1_BOVIN|466;	blastp_anc_centriole_genes:NA	blastp_cell_cycle:TRAP1_BOVIN|466;	blastp_chrom_mod:NA	blastp_chrom_remod:NA	blastp_RBPDB:NA	blastp_RNA_Binding:TRAP1_BOVIN|466;	NA	1	1	106.448
SteCoe_1973	Aminotransferase class-V	Aminotran_5 domain protein	blastp_trinity:SERC_DROME|360;	pfam:SERC_DROME|360;	blastp_anc_centriole_genes:NA	blastp_cell_cycle:NA	blastp_chrom_mod:NA	blastp_chrom_remod:NA	blastp_RBPDB:NA	blastp_RNA_Binding:NA	NA	1	1	69.173
SteCoe_11799	Coenzyme A transferase	CoA_trans domain protein	blastp_trinity:SCOT_DICDI|553;	pfam:SCOT_DICDI|553;	blastp_anc_centriole_genes:NA	blastp_cell_cycle:NA	blastp_chrom_mod:NA	blastp_chrom_remod:NA	blastp_RBPDB:NA	blastp_RNA_Binding:NA	NA	1	1	7.85146
SteCoe_13010	Calreticulin domain protein	Calreticulin domain protein	blastp_trinity:CALR_DICDI|391;	pfam:CALR_DICDI|391;	blastp_anc_centriole_genes:NA	blastp_cell_cycle:CALR_DICDI|391;	blastp_chrom_mod:NA	blastp_chrom_remod:NA	blastp_RBPDB:NA	blastp_RNA_Binding:CALR_DICDI|391;	NA	1	1	66.6266
SteCoe_25929	Acyl-CoA oxidase	Acyl-CoA_dh_M domain protein	blastp_trinity:ACOX3_MOUSE|311;	pfam:ACOX3_MOUSE|311;	blastp_anc_centriole_genes:NA	blastp_cell_cycle:NA	blastp_chrom_mod:NA	blastp_chrom_remod:NA	blastp_RBPDB:NA	blastp_RNA_Binding:NA	NA	1	1	4.76133
SteCoe_33164	hypothetical	hypothetical protein	blastp_trinity:PEAM1_ARATH|68.2;	pfam:PEAM1_ARATH|68.2;	blastp_anc_centriole_genes:NA	blastp_cell_cycle:NA	blastp_chrom_mod:NA	blastp_chrom_remod:NA	blastp_RBPDB:NA	blastp_RNA_Binding:NA	NA	1	1	848.85
SteCoe_8324	hypotheitcal	hypothetical protein	blastp_trinity:RBP2A_PLAF7|56.2;	pfam:NA	blastp_anc_centriole_genes:NA	blastp_cell_cycle:NA	blastp_chrom_mod:NA	blastp_chrom_remod:NA	blastp_RBPDB:NA	blastp_RNA_Binding:NA	NA	1	1	75.8198
SteCoe_34685	ypothetical	hypothetical protein	blastp_trinity:VDAC2_ARATH|53.9;	pfam:VDAC2_ARATH|53.9;	blastp_anc_centriole_genes:NA	blastp_cell_cycle:NA	blastp_chrom_mod:NA	blastp_chrom_remod:NA	blastp_RBPDB:NA	blastp_RNA_Binding:NA	NA	1	1	8.37679
SteCoe_5434	Homocysteine S-methyltransfera	S-methyl_trans domain protein	blastp_trinity:METH_BOVIN|1342;	pfam:METH_BOVIN|1342;	blastp_anc_centriole_genes:NA	blastp_cell_cycle:NA	blastp_chrom_mod:NA	blastp_chrom_remod:NA	blastp_RBPDB:NA	blastp_RNA_Binding:NA	NA	1	1	255.968
SteCoe_34329	Exportin 1-like protein	hypothetical protein	blastp_trinity:XPOT_ARATH|118;	pfam:XPOT_ARATH|118;	blastp_anc_centriole_genes:NA	blastp_cell_cycle:NA	blastp_chrom_mod:NA	blastp_chrom_remod:NA	blastp_RBPDB:NA	blastp_RNA_Binding:XPOT_ARATH|118;	NA	1	1	29.5473
SteCoe_10227	enoyl-CoA hydratase/isomerase	ECH_2 domain protein	blastp_trinity:HIBCH_CHICK|160;	pfam:HIBCH_CHICK|160;	blastp_anc_centriole_genes:NA	blastp_cell_cycle:NA	blastp_chrom_mod:NA	blastp_chrom_remod:NA	blastp_RBPDB:NA	blastp_RNA_Binding:NA	NA	1	1	9.09598
SteCoe_8539	Mitochondrial translatioEF-Tu	GTP_EFTU domain protein	blastp_trinity:EFTU_PSELT|201;	pfam:EFTU_PSELT|201;	blastp_anc_centriole_genes:NA	blastp_cell_cycle:EFTU_PSELT|201;	blastp_chrom_mod:NA	blastp_chrom_remod:NA	blastp_RBPDB:NA	blastp_RNA_Binding:EFTU_PSELT|201;	NA	1	1	31.5758
SteCoe_22428	Mitochondrial translatioEF-Tu	GTP_EFTU domain protein	blastp_trinity:TYPA_HELPJ|481;	pfam:TYPA_HELPJ|481;	blastp_anc_centriole_genes:NA	blastp_cell_cycle:TYPA_HELPJ|481;	blastp_chrom_mod:NA	blastp_chrom_remod:NA	blastp_RBPDB:NA	blastp_RNA_Binding:TYPA_HELPJ|481;	NA	1	1	7.9228
SteCoe_21368	hypothetical	hypothetical protein	blastp_trinity:NA	pfam:	blastp_anc_centriole_genes:NA	blastp_cell_cycle:NA	blastp_chrom_mod:NA	blastp_chrom_remod:NA	blastp_RBPDB:NA	blastp_RNA_Binding:NA	NA	1	1	12.7586
SteCoe_8126	DnaJ domain	DnaJ domain protein	blastp_trinity:DNJH_CUCSA|295;	pfam:DNJH_CUCSA|295;	blastp_anc_centriole_genes:NA	blastp_cell_cycle:NA	blastp_chrom_mod:NA	blastp_chrom_remod:NA	blastp_RBPDB:NA	blastp_RNA_Binding:NA	NA	1	1	219.53
SteCoe_12036	protin disulfide isomerase	Thioredoxin domain protein	blastp_trinity:PDIA6_MOUSE|341;	pfam:PDIA6_MOUSE|341;	blastp_anc_centriole_genes:NA	blastp_cell_cycle:NA	blastp_chrom_mod:NA	blastp_chrom_remod:NA	blastp_RBPDB:NA	blastp_RNA_Binding:PDIA6_MOUSE|341;	NA	1	1	12.4742
SteCoe_10034	superoxide dismutase	Sod_Fe_N domain protein	blastp_trinity:SODM_CHLRE|214;	pfam:SODM_CHLRE|214;	blastp_anc_centriole_genes:NA	blastp_cell_cycle:NA	blastp_chrom_mod:NA	blastp_chrom_remod:NA	blastp_RBPDB:NA	blastp_RNA_Binding:NA	NA	1	1	19.1004
SteCoe_23523	Aminotransferase class-V	Aminotran_5 domain protein	blastp_trinity:SERC_DROME|353;	pfam:SERC_DROME|353;	blastp_anc_centriole_genes:NA	blastp_cell_cycle:NA	blastp_chrom_mod:NA	blastp_chrom_remod:NA	blastp_RBPDB:NA	blastp_RNA_Binding:NA	NA	1	1	29.8179
SteCoe_26987	mitochondrial glycoprotein	MAM33 domain protein	blastp_trinity:MAM33_SCHPO|81.6;	pfam:MAM33_SCHPO|81.6;	blastp_anc_centriole_genes:NA	blastp_cell_cycle:NA	blastp_chrom_mod:NA	blastp_chrom_remod:NA	blastp_RBPDB:NA	blastp_RNA_Binding:NA	NA	1	1	107.485
SteCoe_17154	hypothetical	Thioredoxin domain protein	blastp_trinity:NA	pfam:	blastp_anc_centriole_genes:NA	blastp_cell_cycle:NA	blastp_chrom_mod:NA	blastp_chrom_remod:NA	blastp_RBPDB:NA	blastp_RNA_Binding:NA	NA	1	1	11.0024
SteCoe_28553	aminotransferase	Aminotran_1_2 domain protein	blastp_trinity:AATC_DAUCA|468;	pfam:AATC_DAUCA|468;	blastp_anc_centriole_genes:NA	blastp_cell_cycle:NA	blastp_chrom_mod:NA	blastp_chrom_remod:NA	blastp_RBPDB:NA	blastp_RNA_Binding:AATC_DAUCA|468;	NA	1	1	37.7744
SteCoe_31832	Hsp70 protein	HSP70 domain protein	blastp_trinity:DNAK_NITWN|866;	pfam:DNAK_NITWN|866;	blastp_anc_centriole_genes:NA	blastp_cell_cycle:DNAK_NITWN|866;	blastp_chrom_mod:NA	blastp_chrom_remod:NA	blastp_RBPDB:NA	blastp_RNA_Binding:DNAK_NITWN|866;	NA	1	1	41.4
SteCoe_14295	Hsp90 protein	HATPase_c domain protein	blastp_trinity:HSP82_ORYSJ|964;	pfam:HSP82_ORYSJ|964;	blastp_anc_centriole_genes:NA	blastp_cell_cycle:HSP82_ORYSJ|964;	blastp_chrom_mod:NA	blastp_chrom_remod:NA	blastp_RBPDB:NA	blastp_RNA_Binding:HSP82_ORYSJ|964;	NA	1	1	831.19
SteCoe_1420	hypothetical	hypothetical protein	blastp_trinity:NA	pfam:	blastp_anc_centriole_genes:NA	blastp_cell_cycle:NA	blastp_chrom_mod:NA	blastp_chrom_remod:NA	blastp_RBPDB:NA	blastp_RNA_Binding:NA	NA	1	1	4.80242
SteCoe_29240	choline kinase	Choline_kinase domain protein	blastp_trinity:CHKA_HUMAN|103;	pfam:CHKA_HUMAN|103;	blastp_anc_centriole_genes:NA	blastp_cell_cycle:NA	blastp_chrom_mod:NA	blastp_chrom_remod:NA	blastp_RBPDB:NA	blastp_RNA_Binding:NA	NA	1	1	5.01465
SteCoe_16950	Protein phosphatase 2C	PP2C domain protein	blastp_trinity:P2C35_ARATH|163;	pfam:P2C35_ARATH|163;	blastp_anc_centriole_genes:NA	blastp_cell_cycle:P2C35_ARATH|163;	blastp_chrom_mod:P2C35_ARATH|163;	blastp_chrom_remod:NA	blastp_RBPDB:NA	blastp_RNA_Binding:NA	NA	1	1	8.54381
SteCoe_36146	AAA domain-containing protein 3A/B	hypothetical protein	blastp_trinity:ATD3A_XENLA|436;	pfam:ATD3A_XENLA|436;	blastp_anc_centriole_genes:NA	blastp_cell_cycle:ATD3A_XENLA|436;	blastp_chrom_mod:ATD3A_XENLA|436;	blastp_chrom_remod:ATD3A_XENLA|436;	blastp_RBPDB:NA	blastp_RNA_Binding:ATD3A_XENLA|436;	NA	1	1	3.76254
SteCoe_26024	Ribosomal protein L1p	Ribosomal_L1 domain protein	blastp_trinity:R10AB_DROME|236;	pfam:R10AB_DROME|236;	blastp_anc_centriole_genes:NA	blastp_cell_cycle:R10AB_DROME|236;	blastp_chrom_mod:NA	blastp_chrom_remod:NA	blastp_RBPDB:NA	blastp_RNA_Binding:R10AB_DROME|236;	NA	1	1	63.3106
SteCoe_21486	hypothetical	hypothetical protein	blastp_trinity:PCSK5_RAT|70.1;	pfam:PCSK5_RAT|70.1;	blastp_anc_centriole_genes:NA	blastp_cell_cycle:NA	blastp_chrom_mod:NA	blastp_chrom_remod:NA	blastp_RBPDB:NA	blastp_RNA_Binding:NA	NA	1	1	21.9258
SteCoe_27442	S-adenosylmethionine synthetase	S-AdoMet_synt_N domain protein	blastp_trinity:METK_DICDI|546;	pfam:METK_DICDI|546;	blastp_anc_centriole_genes:NA	blastp_cell_cycle:METK_DICDI|546;	blastp_chrom_mod:NA	blastp_chrom_remod:NA	blastp_RBPDB:NA	blastp_RNA_Binding:NA	NA	1	1	112.835
SteCoe_24949	SecY translocase	Plug_translocon domain protein	blastp_trinity:SC61A_DICDI|667;	pfam:SC61A_DICDI|667;	blastp_anc_centriole_genes:NA	blastp_cell_cycle:NA	blastp_chrom_mod:NA	blastp_chrom_remod:NA	blastp_RBPDB:NA	blastp_RNA_Binding:NA	NA	1	1	82.1268
SteCoe_16523	Glutamine amidotransferases	GATase_6 domain protein	blastp_trinity:GFAT_MIMIV|270;	pfam:GFAT_MIMIV|270;	blastp_anc_centriole_genes:NA	blastp_cell_cycle:NA	blastp_chrom_mod:NA	blastp_chrom_remod:NA	blastp_RBPDB:NA	blastp_RNA_Binding:NA	NA	1	1	31.1887
SteCoe_20934		HSP70 domain protein											1
SteCoe_29645		SRP-alpha_N domain protein											1
SteCoe_29652		hypothetical protein											1
SteCoe_37300		hypothetical protein											1
SteCoe_750		Acyl-CoA_dh_M domain protein											1
SteCoe_8145		Inhibitor_I29 domain protein											1
SteCoe_7443	hypothetical	Kelch_4 domain protein	blastp_trinity:NA	pfam:	blastp_anc_centriole_genes:NA	blastp_cell_cycle:NA	blastp_chrom_mod:NA	blastp_chrom_remod:NA	blastp_RBPDB:NA	blastp_RNA_Binding:NA	NA	2	2	5.04262
SteCoe_591	phosphoglycerate mutase	His_Phos_1 domain protein	blastp_trinity:PGAM_DICDI|332;	pfam:PGAM_DICDI|332;	blastp_anc_centriole_genes:NA	blastp_cell_cycle:NA	blastp_chrom_mod:NA	blastp_chrom_remod:NA	blastp_RBPDB:NA	blastp_RNA_Binding:NA	NA	2	2	67.3451
SteCoe_31827	Apartyl protease	Asp domain protein	blastp_trinity:CATD_DICDI|313;	pfam:CATD_DICDI|313;	blastp_anc_centriole_genes:NA	blastp_cell_cycle:NA	blastp_chrom_mod:NA	blastp_chrom_remod:NA	blastp_RBPDB:NA	blastp_RNA_Binding:NA	NA	2	2	282.08
SteCoe_27981	Serine carboxypeptidase	Peptidase_S10 domain protein	blastp_trinity:SCP20_ARATH|253;	pfam:SCP20_ARATH|253;	blastp_anc_centriole_genes:NA	blastp_cell_cycle:NA	blastp_chrom_mod:NA	blastp_chrom_remod:NA	blastp_RBPDB:NA	blastp_RNA_Binding:NA	NA	2	2	159.844
SteCoe_37819	Aldo/keto reductase family stress induced	Aldo_ket_red domain protein	blastp_trinity:S6PD_MALDO|226;	pfam:S6PD_MALDO|226;	blastp_anc_centriole_genes:NA	blastp_cell_cycle:NA	blastp_chrom_mod:NA	blastp_chrom_remod:NA	blastp_RBPDB:NA	blastp_RNA_Binding:S6PD_MALDO|226;	NA	2	2	43.9428
SteCoe_33569	Serine carboxypeptidase	hypothetical protein	blastp_trinity:SCP21_ARATH|261;	pfam:SCP21_ARATH|261;	blastp_anc_centriole_genes:NA	blastp_cell_cycle:NA	blastp_chrom_mod:NA	blastp_chrom_remod:NA	blastp_RBPDB:NA	blastp_RNA_Binding:NA	NA	2	2	15.907
SteCoe_18848	CAM Kinase	CAMK related kinase	blastp_trinity:KCC1D_MOUSE|169;	pfam:KCC1D_MOUSE|169;	blastp_anc_centriole_genes:KCC1D_MOUSE|169;	blastp_cell_cycle:KCC1D_MOUSE|169;	blastp_chrom_mod:KCC1D_MOUSE|169;	blastp_chrom_remod:KCC1D_MOUSE|169;	blastp_RBPDB:KCC1D_MOUSE|169;	blastp_RNA_Binding:KCC1D_MOUSE|169;	NA	2	2	16.616
SteCoe_2793	glycosyl hydrolase	Glyco_hydro_16 domain protein	blastp_trinity:E13B_BACCI|108;	pfam:E13B_BACCI|108;	blastp_anc_centriole_genes:NA	blastp_cell_cycle:NA	blastp_chrom_mod:NA	blastp_chrom_remod:NA	blastp_RBPDB:NA	blastp_RNA_Binding:NA	NA	2	2	114.944
SteCoe_13816	aspartyl protease	Asp domain protein	blastp_trinity:CATD_DICDI|296;	pfam:CATD_DICDI|296;	blastp_anc_centriole_genes:NA	blastp_cell_cycle:NA	blastp_chrom_mod:NA	blastp_chrom_remod:NA	blastp_RBPDB:NA	blastp_RNA_Binding:NA	NA	2	2	483.099
SteCoe_26694	papain family cysteine protease	Peptidase_C1 domain protein	blastp_trinity:CATB1_GIAIN|133;	pfam:CATB1_GIAIN|133;	blastp_anc_centriole_genes:NA	blastp_cell_cycle:NA	blastp_chrom_mod:NA	blastp_chrom_remod:NA	blastp_RBPDB:NA	blastp_RNA_Binding:NA	NA	2	2	14.9422
SteCoe_26895	glycosyl hydrolase	NtCtMGAM_N domain protein	blastp_trinity:AGLU_ORYSJ|501;	pfam:AGLU_ORYSJ|501;	blastp_anc_centriole_genes:NA	blastp_cell_cycle:NA	blastp_chrom_mod:NA	blastp_chrom_remod:NA	blastp_RBPDB:NA	blastp_RNA_Binding:AGLU_ORYSJ|501;	NA	2	2	49.2691
SteCoe_16970	hypothtical	E1_DerP2_DerF2 domain protein	blastp_trinity:NA	pfam:	blastp_anc_centriole_genes:NA	blastp_cell_cycle:NA	blastp_chrom_mod:NA	blastp_chrom_remod:NA	blastp_RBPDB:NA	blastp_RNA_Binding:NA	NA	2	2	1047.83
SteCoe_19592	Hsp70 protein	HSP70 domain protein	blastp_trinity:HYOU1_RAT|288;	pfam:HYOU1_RAT|288;	blastp_anc_centriole_genes:NA	blastp_cell_cycle:HYOU1_RAT|288;	blastp_chrom_mod:NA	blastp_chrom_remod:NA	blastp_RBPDB:NA	blastp_RNA_Binding:HYOU1_RAT|288;	NA	2	2	35.5125
SteCoe_31133	Serine carboxypeptidase	Peptidase_S10 domain protein	blastp_trinity:SCP50_ARATH|175;	pfam:SCP50_ARATH|175;	blastp_anc_centriole_genes:NA	blastp_cell_cycle:NA	blastp_chrom_mod:NA	blastp_chrom_remod:NA	blastp_RBPDB:NA	blastp_RNA_Binding:NA	NA	2	2	25.7077
SteCoe_22372	hypothetical	hypothetical protein	blastp_trinity:ABPF_DICDI|127;	pfam:NA	blastp_anc_centriole_genes:NA	blastp_cell_cycle:NA	blastp_chrom_mod:NA	blastp_chrom_remod:NA	blastp_RBPDB:NA	blastp_RNA_Binding:NA	NA	2	2	62.5712
SteCoe_21382	importin beta	HEAT domain protein	blastp_trinity:IPO5_MOUSE|356;	pfam:IPO5_MOUSE|356;	blastp_anc_centriole_genes:NA	blastp_cell_cycle:NA	blastp_chrom_mod:NA	blastp_chrom_remod:NA	blastp_RBPDB:NA	blastp_RNA_Binding:IPO5_MOUSE|356;	NA	2	2	380.832
SteCoe_34268	CDPK	CDPK family kinase	blastp_trinity:CDPK2_PLAFK|296;	pfam:CDPK2_PLAFK|296;	blastp_anc_centriole_genes:CDPK2_PLAFK|296;	blastp_cell_cycle:CDPK2_PLAFK|296;	blastp_chrom_mod:CDPK2_PLAFK|296;	blastp_chrom_remod:CDPK2_PLAFK|296;	blastp_RBPDB:CDPK2_PLAFK|296;	blastp_RNA_Binding:CDPK2_PLAFK|296;	NA	2	2	15.9972
SteCoe_34287	von willebrand factor domain calcium activated chloride transporter	hypothetical protein	blastp_trinity:WAV3_ARATH|68.6;	pfam:WAV3_ARATH|68.6;	blastp_anc_centriole_genes:NA	blastp_cell_cycle:NA	blastp_chrom_mod:NA	blastp_chrom_remod:NA	blastp_RBPDB:NA	blastp_RNA_Binding:NA	NA	2	2	36.2534
SteCoe_9522	Acetylserotonin O-methyltransferase	Methyltransf_2 domain protein	blastp_trinity:SFMM3_STRLA|111;	pfam:SFMM3_STRLA|111;	blastp_anc_centriole_genes:NA	blastp_cell_cycle:NA	blastp_chrom_mod:NA	blastp_chrom_remod:NA	blastp_RBPDB:NA	blastp_RNA_Binding:NA	NA	2	2	898.556
SteCoe_2423	hypothetical	hypothetical protein	blastp_trinity:RBP2A_PLAF7|60.1;	pfam:NA	blastp_anc_centriole_genes:NA	blastp_cell_cycle:NA	blastp_chrom_mod:NA	blastp_chrom_remod:NA	blastp_RBPDB:NA	blastp_RNA_Binding:NA	NA	2	2	95.648
SteCoe_24247	hypothetical	hypothetical protein	blastp_trinity:NA	pfam:	blastp_anc_centriole_genes:NA	blastp_cell_cycle:NA	blastp_chrom_mod:NA	blastp_chrom_remod:NA	blastp_RBPDB:NA	blastp_RNA_Binding:NA	NA	2	2	94.8184
SteCoe_15266	hypothetical	hypothetical protein	blastp_trinity:ABPF_DICDI|133;	pfam:ABPF_DICDI|133;	blastp_anc_centriole_genes:NA	blastp_cell_cycle:NA	blastp_chrom_mod:NA	blastp_chrom_remod:NA	blastp_RBPDB:NA	blastp_RNA_Binding:NA	NA	2	2	37.1898
SteCoe_31642	dual specificity protein kinase	DSPc domain protein	blastp_trinity:DUS22_MOUSE|109;	pfam:DUS22_MOUSE|109;	blastp_anc_centriole_genes:NA	blastp_cell_cycle:DUS22_MOUSE|109;	blastp_chrom_mod:NA	blastp_chrom_remod:NA	blastp_RBPDB:NA	blastp_RNA_Binding:DUS22_MOUSE|109;	NA	2	2	19.1177
SteCoe_6626	Cid1 family poly A polymerase	NTP_transf_2 domain protein	blastp_trinity:PAPD5_HUMAN|119;	pfam:PAPD5_HUMAN|119;	blastp_anc_centriole_genes:NA	blastp_cell_cycle:PAPD5_HUMAN|119;	blastp_chrom_mod:NA	blastp_chrom_remod:NA	blastp_RBPDB:NA	blastp_RNA_Binding:PAPD5_HUMAN|119;	NA	2	2	15.5349
SteCoe_18829	TRP1 channel	WD40 domain protein	blastp_trinity:NA	pfam:	blastp_anc_centriole_genes:NA	blastp_cell_cycle:NA	blastp_chrom_mod:NA	blastp_chrom_remod:NA	blastp_RBPDB:NA	blastp_RNA_Binding:NA	NA	2	2	9.99686
SteCoe_17463	Hsp70 protein	HSP70 domain protein	blastp_trinity:MD37A_ARATH|908;	pfam:MD37A_ARATH|908;	blastp_anc_centriole_genes:NA	blastp_cell_cycle:MD37A_ARATH|908;	blastp_chrom_mod:NA	blastp_chrom_remod:NA	blastp_RBPDB:NA	blastp_RNA_Binding:MD37A_ARATH|908;	NA	2	2	374.412
SteCoe_2628	papain family cysteine protease	Inhibitor_I29 domain protein	blastp_trinity:SAG39_ORYSI|282;	pfam:SAG39_ORYSI|282;	blastp_anc_centriole_genes:NA	blastp_cell_cycle:NA	blastp_chrom_mod:NA	blastp_chrom_remod:NA	blastp_RBPDB:NA	blastp_RNA_Binding:NA	NA	2	2	1934.71
SteCoe_9240	cellulase domain protein	Cellulase domain protein	blastp_trinity:GUNA_XANCP|140;	pfam:GUNA_XANCP|140;	blastp_anc_centriole_genes:NA	blastp_cell_cycle:NA	blastp_chrom_mod:NA	blastp_chrom_remod:NA	blastp_RBPDB:NA	blastp_RNA_Binding:NA	NA	2	2	91.9138
SteCoe_8031	ExoIII family purinicapyrimidinic (AP) endonuclease	Exo_endo_phos domain protein	blastp_trinity:APEX1_DANRE|251;	pfam:APEX1_DANRE|251;	blastp_anc_centriole_genes:NA	blastp_cell_cycle:NA	blastp_chrom_mod:NA	blastp_chrom_remod:NA	blastp_RBPDB:NA	blastp_RNA_Binding:APEX1_DANRE|251;	NA	2	2	15.9941
SteCoe_5044	papain family cysteine protease	Inhibitor_I29 domain protein	blastp_trinity:SAG39_ORYSJ|282;	pfam:SAG39_ORYSJ|282;	blastp_anc_centriole_genes:NA	blastp_cell_cycle:NA	blastp_chrom_mod:NA	blastp_chrom_remod:NA	blastp_RBPDB:NA	blastp_RNA_Binding:NA	NA	2	2	287.161
SteCoe_6108	Beta-lactamase superfamily	Lactamase_B_4 domain protein	blastp_trinity:RNZ3_ARATH|255;	pfam:RNZ3_ARATH|255;	blastp_anc_centriole_genes:NA	blastp_cell_cycle:RNZ3_ARATH|255;	blastp_chrom_mod:NA	blastp_chrom_remod:NA	blastp_RBPDB:NA	blastp_RNA_Binding:RNZ3_ARATH|255;	NA	2	2	15.2856
SteCoe_30233	sugar-phosphate isomerase	LacAB_rpiB domain protein	blastp_trinity:RPIB_ECOLI|105;	pfam:RPIB_ECOLI|105;	blastp_anc_centriole_genes:NA	blastp_cell_cycle:NA	blastp_chrom_mod:NA	blastp_chrom_remod:NA	blastp_RBPDB:NA	blastp_RNA_Binding:NA	NA	2	2	9.40341
SteCoe_39062	aspartyl protease	Asp domain protein	blastp_trinity:NA	pfam:	blastp_anc_centriole_genes:NA	blastp_cell_cycle:NA	blastp_chrom_mod:NA	blastp_chrom_remod:NA	blastp_RBPDB:NA	blastp_RNA_Binding:NA	NA	2	2	81.9518
SteCoe_1837		CBM_20 domain protein											2
SteCoe_20625		Asp domain protein											2
SteCoe_23630		zf-met domain protein											2
SteCoe_24342		TauE domain protein											2
SteCoe_26051		Peptidase_S10 domain protein											2
SteCoe_2997		hypothetical protein											2
SteCoe_3102		hypothetical protein											2
SteCoe_3130		hypothetical protein											2
SteCoe_31794		Methyltransf_25 domain protein											2
SteCoe_36821		GTP_EFTU domain protein											2
SteCoe_38039		hypothetical protein											2
SteCoe_9789		PAP2 domain protein											2
SteCoe_37123	carbonic anhydrase	Carb_anhydrase domain protein	blastp_trinity:CAH_NEIGO|94.0;	pfam:CAH_NEIGO|94.0;	blastp_anc_centriole_genes:NA	blastp_cell_cycle:NA	blastp_chrom_mod:NA	blastp_chrom_remod:NA	blastp_RBPDB:NA	blastp_RNA_Binding:NA	NA	3	3	2.1593
SteCoe_3746	Ammonium Transporter Family	Ammonium_transp domain protein	blastp_trinity:AMT2_DICDI|110;	pfam:AMT2_DICDI|110;	blastp_anc_centriole_genes:NA	blastp_cell_cycle:NA	blastp_chrom_mod:NA	blastp_chrom_remod:NA	blastp_RBPDB:NA	blastp_RNA_Binding:NA	NA	3	3	9.60047
SteCoe_43	nucleolar GTP binding protein NOG1	NOG1 domain protein	blastp_trinity:NOG1_ARATH|538;	pfam:NOG1_ARATH|538;	blastp_anc_centriole_genes:NA	blastp_cell_cycle:NOG1_ARATH|538;	blastp_chrom_mod:NA	blastp_chrom_remod:NA	blastp_RBPDB:NA	blastp_RNA_Binding:NOG1_ARATH|538;	NA	3	3	148.001
SteCoe_3760	Ammonium Transporter	Ammonium_transp domain protein	blastp_trinity:AMT2_DICDI|100;	pfam:AMT2_DICDI|100;	blastp_anc_centriole_genes:NA	blastp_cell_cycle:NA	blastp_chrom_mod:NA	blastp_chrom_remod:NA	blastp_RBPDB:NA	blastp_RNA_Binding:NA	NA	3	3	0.453456
SteCoe_168	major facilitator family membrane protein	MFS_1 domain protein	blastp_trinity:PTR36_ARATH|94.7;	pfam:PTR36_ARATH|94.7;	blastp_anc_centriole_genes:NA	blastp_cell_cycle:NA	blastp_chrom_mod:NA	blastp_chrom_remod:NA	blastp_RBPDB:NA	blastp_RNA_Binding:NA	NA	3	3	15.0253
SteCoe_21888	nucleolar protein NGP1NT	NGP1NT domain protein	blastp_trinity:NOG2_MOUSE|493;	pfam:NOG2_MOUSE|493;	blastp_anc_centriole_genes:NA	blastp_cell_cycle:NOG2_MOUSE|493;	blastp_chrom_mod:NA	blastp_chrom_remod:NA	blastp_RBPDB:NA	blastp_RNA_Binding:NOG2_MOUSE|493;	NA	3	3	26.424
SteCoe_12911	hypothetical	CEP19 domain protein	blastp_trinity:NA	pfam:	blastp_anc_centriole_genes:NA	blastp_cell_cycle:NA	blastp_chrom_mod:NA	blastp_chrom_remod:NA	blastp_RBPDB:NA	blastp_RNA_Binding:NA	NA	3	3	8.98132
SteCoe_19883	IFT52	hypothetical protein	blastp_trinity:IFT52_MOUSE|381;	pfam:IFT52_MOUSE|381;	blastp_anc_centriole_genes:IFT52_MOUSE|381;	blastp_cell_cycle:NA	blastp_chrom_mod:NA	blastp_chrom_remod:NA	blastp_RBPDB:NA	blastp_RNA_Binding:NA	NA	3	3	2.75815
SteCoe_27506	ABC transporter	ABC2_membrane_3 domain protein	blastp_trinity:AB1A_ARATH|775;	pfam:AB1A_ARATH|775;	blastp_anc_centriole_genes:NA	blastp_cell_cycle:AB1A_ARATH|775;	blastp_chrom_mod:NA	blastp_chrom_remod:NA	blastp_RBPDB:NA	blastp_RNA_Binding:NA	NA	3	3	28.6229
SteCoe_3073	hypothetical	Cgr1 domain protein	blastp_trinity:NA	pfam:	blastp_anc_centriole_genes:NA	blastp_cell_cycle:NA	blastp_chrom_mod:NA	blastp_chrom_remod:NA	blastp_RBPDB:NA	blastp_RNA_Binding:NA	NA	3	3	45.2179
SteCoe_23573		Aconitase domain protein											3
SteCoe_8973		Calreticulin domain protein											3
