# Supplementary material for: Modular, cascade-like transcriptional program of regeneration in Stentor
Source: eLife. 2022 Aug 4;11:e80778. doi: 10.7554/eLife.80778 (PMC9371601; doi:10.7554/eLife.80778)
Supplement: Supplementary file 6. [file elife-80778-supp6.xlsx]

## Sheet: Sheet1
Gene	annotation	blastp_trinity	pfam	blastp_anc_centriole_genes	blastp_cell_cycle	blastp_chrom_mod	blastp_chrom_remod	blastp_RBPDB	blastp_RNA_Binding	NA	clustMem	ClusterPlotOrder	pre_vals
SteCoe_2044	aconitase	blastp_trinity:ACOC_DICDI|1174;	pfam:ACOC_DICDI|1174;	blastp_anc_centriole_genes:NA	blastp_cell_cycle:NA	blastp_chrom_mod:NA	blastp_chrom_remod:NA	blastp_RBPDB:ACOC_DICDI|1174;	blastp_RNA_Binding:ACOC_DICDI|1174;	NA	1	1	25.038
SteCoe_23436	Zinc-binding dehydrogenase	blastp_trinity:MECR_MOUSE|123;	pfam:MECR_MOUSE|123;	blastp_anc_centriole_genes:NA	blastp_cell_cycle:NA	blastp_chrom_mod:NA	blastp_chrom_remod:NA	blastp_RBPDB:NA	blastp_RNA_Binding:MECR_MOUSE|123;	NA	1	1	38.9948
SteCoe_19793	NAD_binding_10 domain protein	blastp_trinity:YL056_YEAST|66.6;	pfam:YL056_YEAST|66.6;	blastp_anc_centriole_genes:NA	blastp_cell_cycle:NA	blastp_chrom_mod:NA	blastp_chrom_remod:NA	blastp_RBPDB:NA	blastp_RNA_Binding:NA	NA	1	1	27.937
SteCoe_35334	DNAJ like protein	blastp_trinity:DNJC7_DICDI|224;	pfam:DNJC7_DICDI|224;	blastp_anc_centriole_genes:NA	blastp_cell_cycle:NA	blastp_chrom_mod:DNJC7_DICDI|224;	blastp_chrom_remod:NA	blastp_RBPDB:NA	blastp_RNA_Binding:DNJC7_DICDI|224;	NA	1	1	215.031
SteCoe_30592	hypothetical	blastp_trinity:NA	pfam:	blastp_anc_centriole_genes:NA	blastp_cell_cycle:NA	blastp_chrom_mod:NA	blastp_chrom_remod:NA	blastp_RBPDB:NA	blastp_RNA_Binding:NA	NA	1	1	54.7278
SteCoe_23753	Ubiquitin family	blastp_trinity:BAG6_ORNAN|68.9;	pfam:BAG6_ORNAN|68.9;	blastp_anc_centriole_genes:NA	blastp_cell_cycle:NA	blastp_chrom_mod:NA	blastp_chrom_remod:NA	blastp_RBPDB:NA	blastp_RNA_Binding:NA	NA	1	1	76.276
SteCoe_27284	Glycosyl hydrolases	blastp_trinity:LYAG_RAT|442;	pfam:LYAG_RAT|442;	blastp_anc_centriole_genes:NA	blastp_cell_cycle:NA	blastp_chrom_mod:NA	blastp_chrom_remod:NA	blastp_RBPDB:NA	blastp_RNA_Binding:LYAG_RAT|442;	NA	1	1	72.2964
SteCoe_19911	Copine family protein	blastp_trinity:CPNE7_RAT|372;	pfam:CPNE7_RAT|372;	blastp_anc_centriole_genes:NA	blastp_cell_cycle:CPNE7_RAT|372;	blastp_chrom_mod:NA	blastp_chrom_remod:NA	blastp_RBPDB:CPNE7_RAT|372;	blastp_RNA_Binding:CPNE7_RAT|372;	NA	1	1	40.7958
SteCoe_9834	PHOSPHATIDYLINOSITOL-4-PHOSPHATE 5-KINASE	blastp_trinity:PI5K2_ARATH|83.2;	pfam:PI5K2_ARATH|83.2;	blastp_anc_centriole_genes:PI5K2_ARATH|83.2;	blastp_cell_cycle:NA	blastp_chrom_mod:PI5K2_ARATH|83.2;	blastp_chrom_remod:NA	blastp_RBPDB:NA	blastp_RNA_Binding:NA	NA	3	2	5.27608
SteCoe_28750	NPHP4	blastp_trinity:NPHP4_XENLA|188;	pfam:NPHP4_XENLA|188;	blastp_anc_centriole_genes:NPHP4_XENLA|188;	blastp_cell_cycle:NA	blastp_chrom_mod:NA	blastp_chrom_remod:NA	blastp_RBPDB:NA	blastp_RNA_Binding:NA	NA	3	2	6.52761
SteCoe_14992	Alpha/beta hydrolase	blastp_trinity:YQKD_BACSU|80.1;	pfam:YQKD_BACSU|80.1;	blastp_anc_centriole_genes:NA	blastp_cell_cycle:NA	blastp_chrom_mod:NA	blastp_chrom_remod:NA	blastp_RBPDB:NA	blastp_RNA_Binding:NA	NA	3	2	1.5786
SteCoe_31175	kinase related to Ciliate-C1 family	blastp_trinity:KIN10_ARATH|166;	pfam:KIN10_ARATH|166;	blastp_anc_centriole_genes:KIN10_ARATH|166;	blastp_cell_cycle:KIN10_ARATH|166;	blastp_chrom_mod:KIN10_ARATH|166;	blastp_chrom_remod:KIN10_ARATH|166;	blastp_RBPDB:NA	blastp_RNA_Binding:KIN10_ARATH|166;	NA	3	2	2.99487
SteCoe_20125	Rab-GTPase-TBC domain	blastp_trinity:EVI5_DROME|101;	pfam:EVI5_DROME|101;	blastp_anc_centriole_genes:NA	blastp_cell_cycle:NA	blastp_chrom_mod:NA	blastp_chrom_remod:NA	blastp_RBPDB:NA	blastp_RNA_Binding:NA	NA	3	2	4.14636
SteCoe_14127	hypothetical	blastp_trinity:NA	pfam:	blastp_anc_centriole_genes:NA	blastp_cell_cycle:NA	blastp_chrom_mod:NA	blastp_chrom_remod:NA	blastp_RBPDB:NA	blastp_RNA_Binding:NA	NA	3	2	2.78659
SteCoe_29950	kinesin family member	blastp_trinity:KIF15_STRPU|447;	pfam:KIF15_STRPU|447;	blastp_anc_centriole_genes:NA	blastp_cell_cycle:KIF15_STRPU|447;	blastp_chrom_mod:NA	blastp_chrom_remod:NA	blastp_RBPDB:KIF15_STRPU|447;	blastp_RNA_Binding:KIF15_STRPU|447;	NA	4	3	65.5116
SteCoe_16291	D-alanyl-D-alanine carboxypeptidase	blastp_trinity:DACB_BACSU|132;	pfam:DACB_BACSU|132;	blastp_anc_centriole_genes:NA	blastp_cell_cycle:DACB_BACSU|132;	blastp_chrom_mod:NA	blastp_chrom_remod:NA	blastp_RBPDB:NA	blastp_RNA_Binding:NA	NA	4	3	0.7709
SteCoe_27154	Alpha/beta hydrolase	blastp_trinity:YQKD_BACSU|80.5;	pfam:YQKD_BACSU|80.5;	blastp_anc_centriole_genes:NA	blastp_cell_cycle:NA	blastp_chrom_mod:NA	blastp_chrom_remod:NA	blastp_RBPDB:NA	blastp_RNA_Binding:NA	NA	4	3	1.34298
SteCoe_37226	hypothetical	blastp_trinity:HOOK1_CHICK|122;	pfam:HOOK1_CHICK|122;	blastp_anc_centriole_genes:NA	blastp_cell_cycle:NA	blastp_chrom_mod:NA	blastp_chrom_remod:NA	blastp_RBPDB:NA	blastp_RNA_Binding:NA	NA	4	3	4.06883
SteCoe_28522	Acetylserotonin O-methyltransferase	blastp_trinity:6OMT_PAPSO|146;	pfam:6OMT_PAPSO|146;	blastp_anc_centriole_genes:NA	blastp_cell_cycle:NA	blastp_chrom_mod:NA	blastp_chrom_remod:NA	blastp_RBPDB:NA	blastp_RNA_Binding:NA	NA	2	4	0.604423
SteCoe_18146	Hsp90 protein	blastp_trinity:ENPL_RAT|594;	pfam:ENPL_RAT|594;	blastp_anc_centriole_genes:NA	blastp_cell_cycle:ENPL_RAT|594;	blastp_chrom_mod:NA	blastp_chrom_remod:NA	blastp_RBPDB:NA	blastp_RNA_Binding:ENPL_RAT|594;	NA	2	4	6.8678
SteCoe_33364	protein disulfide isomerase	blastp_trinity:PDIA6_RAT|335;	pfam:PDIA6_RAT|335;	blastp_anc_centriole_genes:NA	blastp_cell_cycle:NA	blastp_chrom_mod:NA	blastp_chrom_remod:NA	blastp_RBPDB:NA	blastp_RNA_Binding:PDIA6_RAT|335;	NA	2	4	4.23772
SteCoe_38322	Hsp90 protein	blastp_trinity:ENPL_DICDI|335;	pfam:ENPL_DICDI|335;	blastp_anc_centriole_genes:NA	blastp_cell_cycle:ENPL_DICDI|335;	blastp_chrom_mod:NA	blastp_chrom_remod:NA	blastp_RBPDB:NA	blastp_RNA_Binding:ENPL_DICDI|335;	NA	2	4	23.0439
SteCoe_36006	hypothetical	blastp_trinity:NA	pfam:	blastp_anc_centriole_genes:NA	blastp_cell_cycle:NA	blastp_chrom_mod:NA	blastp_chrom_remod:NA	blastp_RBPDB:NA	blastp_RNA_Binding:NA	NA	2	4	29.2544
SteCoe_29118	CDPK	blastp_trinity:CDPK9_ARATH|57.8;	pfam:CDPK9_ARATH|57.8;	blastp_anc_centriole_genes:NA	blastp_cell_cycle:NA	blastp_chrom_mod:NA	blastp_chrom_remod:NA	blastp_RBPDB:NA	blastp_RNA_Binding:NA	NA	2	4	8.26304
SteCoe_31321	FAP246	blastp_trinity:LRC23_HUMAN|148;	pfam:LRC23_HUMAN|148;	blastp_anc_centriole_genes:LRC23_HUMAN|148;	blastp_cell_cycle:NA	blastp_chrom_mod:NA	blastp_chrom_remod:NA	blastp_RBPDB:NA	blastp_RNA_Binding:NA	NA	2	4	2.61013
