# Supplementary material for: Modular, cascade-like transcriptional program of regeneration in Stentor
Source: eLife. 2022 Aug 4;11:e80778. doi: 10.7554/eLife.80778 (PMC9371601; doi:10.7554/eLife.80778)
Supplement: Supplementary file 7. [file elife-80778-supp7.xlsx]

## Sheet: joined_results_coeruleus_polymo
	S. coeruleus Gene	S coeruleus Gene_Group	Cluster	Sp_transcriptome_ID.x	region.x	ClusterByTime.x	ClusterAssignment.x	Sp_transcriptome_ID.y	region.y	ClusterByTime.y	ClusterAssignment.y	polymorphous_region								now merge etogether all the datasets that came from the anterior or posterior, counting twice if bisection or general
340	SteCoe_25219	OA_specific	3	GGGV01015803.1	anterior	300	4	NA	NA	NA	NA	anterior only				ant	both	post		and for polymorphous, add the "both" to ant and post
441	SteCoe_1580	OA_specific	4	GGGV01041301.1	anterior	180	3	NA	NA	NA	NA	anterior only			OA	4	3	19
456	SteCoe_22297	OA_specific	4	GGGV01005966.1	anterior	180	3	NA	NA	NA	NA	anterior only			sucrose	31	38	210			ant	post
493	SteCoe_5218	OA_specific	4	GGGV01008292.1	anterior	300	4	NA	NA	NA	NA	anterior only			anterior	1	4	23		OA	7	22
723	SteCoe_16801	Sucrose	1	GGGV01012953.1	anterior	180	3	NA	NA	NA	NA	anterior only			tail	3	3	7		sucrose	69	248
976	SteCoe_2843	Sucrose	1	GGGV01008729.1	anterior	90	2	NA	NA	NA	NA	anterior only			bisection	1	3	11		anterior	5	27
1143	SteCoe_37478	Sucrose	1	GGGV01011317.1	anterior	180	3	NA	NA	NA	NA	anterior only			general	0	1	3		tail	6	10
1182	SteCoe_4878	Sucrose	1	GGGV01012426.1	anterior	90	2	NA	NA	NA	NA	anterior only				40	52	273	sum	bisection	4	14
1949	SteCoe_6058	Sucrose	2	GGGV01041609.1	anterior	300	4	NA	NA	NA	NA	anterior only								general	1	4
2036	SteCoe_10081	Sucrose	3	GGGV01038523.1	anterior	300	4	NA	NA	NA	NA	anterior only			total genes upregulated in coeruleus
2287	SteCoe_18577	Sucrose	3	GGGV01010994.1	anterior	300	4	NA	NA	NA	NA	anterior only			in which there are RBH polymorhous genes						Sp
2500	SteCoe_26963	Sucrose	3	GGGV01011622.1	anterior	300	4	NA	NA	NA	NA	anterior only			that are also upregulated:						ant	post
2520	SteCoe_27603	Sucrose	3	GGGV01005550.1	anterior	300	4	NA	NA	NA	NA	anterior only			365					ScPost	17	67
2524	SteCoe_27721	Sucrose	3	GGGV01009362.1	anterior	300	4	NA	NA	NA	NA	anterior only								ScAnt	11	28
2534	SteCoe_28006	Sucrose	3	GGGV01019297.1	anterior	300	4	NA	NA	NA	NA	anterior only
2547	SteCoe_28364	Sucrose	3	GGGV01000518.1	anterior	300	4	NA	NA	NA	NA	anterior only
2590	SteCoe_29797	Sucrose	3	GGGV01034522.1	anterior	300	4	NA	NA	NA	NA	anterior only								ScPost is the OA plus regenerating-anterior plus bisection plus general
2637	SteCoe_32119	Sucrose	3	GGGV01014340.1	anterior	300	4	NA	NA	NA	NA	anterior only								ScAnt is the tail plus bisection plus general
2675	SteCoe_33517	Sucrose	3	GGGV01007510.1	anterior	300	4	NA	NA	NA	NA	anterior only
2683	SteCoe_33755	Sucrose	3	GGGV01004230.1	anterior	300	4	NA	NA	NA	NA	anterior only
2866	SteCoe_79	Sucrose	3	GGGV01035995.1	anterior	300	4	NA	NA	NA	NA	anterior only
2979	SteCoe_1219	Sucrose	4	GGGV01015974.1	anterior	300	4	NA	NA	NA	NA	anterior only
3059	SteCoe_15191	Sucrose	4	GGGV01035217.1	anterior	300	4	NA	NA	NA	NA	anterior only								Fishers exact test P value 0.3600
3074	SteCoe_15883	Sucrose	4	GGGV01011919.1	anterior	300	4	NA	NA	NA	NA	anterior only								so there is no correlation.
3205	SteCoe_2122	Sucrose	4	GGGV01041459.1	anterior	300	4	NA	NA	NA	NA	anterior only
3261	SteCoe_22806	Sucrose	4	GGGV01003899.1	anterior	300	4	NA	NA	NA	NA	anterior only
3401	SteCoe_28397	Sucrose	4	GGGV01025046.1	anterior	300	4	NA	NA	NA	NA	anterior only
3438	SteCoe_29713	Sucrose	4	GGGV01017688.1	anterior	300	4	NA	NA	NA	NA	anterior only
3512	SteCoe_32899	Sucrose	4	GGGV01039654.1	anterior	300	4	NA	NA	NA	NA	anterior only
3543	SteCoe_34308	Sucrose	4	GGGV01003636.1	anterior	300	4	NA	NA	NA	NA	anterior only
3654	SteCoe_5789	Sucrose	4	GGGV01003158.1	anterior	300	4	NA	NA	NA	NA	anterior only
3756	SteCoe_9575	Sucrose	4	GGGV01027614.1	anterior	300	4	NA	NA	NA	NA	anterior only
3900	SteCoe_17664	Sucrose	5	GGGV01020091.1	anterior	300	4	NA	NA	NA	NA	anterior only
4221	SteCoe_6005	Sucrose	5	GGGV01027571.1	anterior	180	3	NA	NA	NA	NA	anterior only
4273	SteCoe_9218	Sucrose	5	GGGV01025772.1	anterior	300	4	NA	NA	NA	NA	anterior only
4413	SteCoe_26166	Anterior	2	GGGV01015959.1	anterior	180	3	NA	NA	NA	NA	anterior only
4584	SteCoe_10203	Tail	1	GGGV01014792.1	anterior	300	4	NA	NA	NA	NA	anterior only
4591	SteCoe_12575	Tail	1	GGGV01013207.1	anterior	180	3	NA	NA	NA	NA	anterior only
4613	SteCoe_27052	Tail	1	GGGV01025606.1	anterior	10	5	NA	NA	NA	NA	anterior only
4721	SteCoe_17463	Bisection	2	GGGV01032840.1	anterior	300	4	NA	NA	NA	NA	anterior only
27	SteCoe_7234	OA_specific	1	GGGV01033604.1	anterior	300	4	GGGV01033604.1	posterior	90	2	anterior and posterior
365	SteCoe_30604	OA_specific	3	GGGV01003398.1	anterior	90	2	GGGV01003398.1	posterior	300	4	anterior and posterior
492	SteCoe_521	OA_specific	4	GGGV01040752.1	anterior	300	4	GGGV01040752.1	posterior	90	2	anterior and posterior
605	SteCoe_10544	Sucrose	1	GGGV01016596.1	anterior	300	4	GGGV01016596.1	posterior	300	4	anterior and posterior
606	SteCoe_10560	Sucrose	1	GGGV01036245.1	anterior	300	4	GGGV01036245.1	posterior	300	4	anterior and posterior
688	SteCoe_14499	Sucrose	1	GGGV01010594.1	anterior	90	2	GGGV01010594.1	posterior	300	4	anterior and posterior
690	SteCoe_14765	Sucrose	1	GGGV01020157.1	anterior	10	5	GGGV01020157.1	posterior	180	3	anterior and posterior
837	SteCoe_22053	Sucrose	1	GGGV01001488.1	anterior	90	2	GGGV01001488.1	posterior	300	4	anterior and posterior
842	SteCoe_22217	Sucrose	1	GGGV01008802.1	anterior	300	4	GGGV01008802.1	posterior	300	4	anterior and posterior
854	SteCoe_22906	Sucrose	1	GGGV01005452.1	anterior	180	3	GGGV01005452.1	posterior	180	3	anterior and posterior
881	SteCoe_23987	Sucrose	1	GGGV01002055.1	anterior	300	4	GGGV01002055.1	posterior	300	4	anterior and posterior
914	SteCoe_26044	Sucrose	1	GGGV01038662.1	anterior	300	4	GGGV01038662.1	posterior	90	2	anterior and posterior
931	SteCoe_26472	Sucrose	1	GGGV01010071.1	anterior	300	4	GGGV01010071.1	posterior	300	4	anterior and posterior
952	SteCoe_27604	Sucrose	1	GGGV01011486.1	anterior	90	2	GGGV01011486.1	posterior	300	4	anterior and posterior
1006	SteCoe_29776	Sucrose	1	GGGV01039050.1	anterior	10	5	GGGV01039050.1	posterior	90	2	anterior and posterior
1184	SteCoe_5002	Sucrose	1	GGGV01031712.1	anterior	180	3	GGGV01031712.1	posterior	300	4	anterior and posterior
1195	SteCoe_5600	Sucrose	1	GGGV01031705.1	anterior	90	2	GGGV01031705.1	posterior	300	4	anterior and posterior
1243	SteCoe_7333	Sucrose	1	GGGV01030633.1	anterior	180	3	GGGV01030633.1	posterior	300	4	anterior and posterior
1275	SteCoe_9323	Sucrose	1	GGGV01011558.1	anterior	90	2	GGGV01011558.1	posterior	180	3	anterior and posterior
1541	SteCoe_20095	Sucrose	2	GGGV01003215.1	anterior	300	4	GGGV01003215.1	posterior	300	4	anterior and posterior
1737	SteCoe_29361	Sucrose	2	GGGV01002681.1	anterior	300	4	GGGV01002681.1	posterior	300	4	anterior and posterior
1741	SteCoe_29508	Sucrose	2	GGGV01015376.1	anterior	180	3	GGGV01015376.1	posterior	300	4	anterior and posterior
1781	SteCoe_3134	Sucrose	2	GGGV01033762.1	anterior	90	2	GGGV01033762.1	posterior	300	4	anterior and posterior
1890	SteCoe_37817	Sucrose	2	GGGV01007758.1	anterior	300	4	GGGV01007758.1	posterior	90	2	anterior and posterior
2013	SteCoe_8869	Sucrose	2	GGGV01024795.1	anterior	300	4	GGGV01024795.1	posterior	300	4	anterior and posterior
2176	SteCoe_15122	Sucrose	3	GGGV01023924.1	anterior	10	5	GGGV01023924.1	posterior	300	4	anterior and posterior
2264	SteCoe_18125	Sucrose	3	GGGV01031105.1	anterior	180	3	GGGV01031105.1	posterior	300	4	anterior and posterior
2307	SteCoe_19422	Sucrose	3	GGGV01010642.1	anterior	300	4	GGGV01010642.1	posterior	180	3	anterior and posterior
2758	SteCoe_37060	Sucrose	3	GGGV01010290.1	anterior	180	3	GGGV01010290.1	posterior	300	4	anterior and posterior
2959	SteCoe_11673	Sucrose	4	GGGV01040277.1	anterior	90	2	GGGV01040277.1	posterior	90	2	anterior and posterior
2993	SteCoe_12582	Sucrose	4	GGGV01030640.1	anterior	10	5	GGGV01030640.1	posterior	90	2	anterior and posterior
3010	SteCoe_13180	Sucrose	4	GGGV01029375.1	anterior	180	3	GGGV01029375.1	posterior	300	4	anterior and posterior
3194	SteCoe_20999	Sucrose	4	GGGV01025563.1	anterior	180	3	GGGV01025563.1	posterior	300	4	anterior and posterior
3274	SteCoe_23192	Sucrose	4	GGGV01011484.1	anterior	10	5	GGGV01011484.1	posterior	90	2	anterior and posterior
3515	SteCoe_33072	Sucrose	4	GGGV01018313.1	anterior	180	3	GGGV01018313.1	posterior	300	4	anterior and posterior
3789	SteCoe_11292	Sucrose	5	GGGV01036617.1	anterior	90	2	GGGV01036617.1	posterior	300	4	anterior and posterior
3965	SteCoe_22466	Sucrose	5	GGGV01032686.1	anterior	300	4	GGGV01032686.1	posterior	90	2	anterior and posterior
4064	SteCoe_29025	Sucrose	5	GGGV01034147.1	anterior	300	4	GGGV01034147.1	posterior	300	4	anterior and posterior
4157	SteCoe_35926	Sucrose	5	GGGV01007880.1	anterior	90	2	GGGV01007880.1	posterior	300	4	anterior and posterior
4167	SteCoe_36785	Sucrose	5	GGGV01002840.1	anterior	10	5	GGGV01002840.1	posterior	300	4	anterior and posterior
4249	SteCoe_7801	Sucrose	5	GGGV01039214.1	anterior	10	5	GGGV01039214.1	posterior	180	3	anterior and posterior
4317	SteCoe_33761	Anterior	1	GGGV01035354.1	anterior	90	2	GGGV01035354.1	posterior	300	4	anterior and posterior
4389	SteCoe_36724	Anterior	2	GGGV01009421.1	anterior	10	5	GGGV01009421.1	posterior	300	4	anterior and posterior
4483	SteCoe_9043	Anterior	2	GGGV01019977.1	anterior	10	5	GGGV01019977.1	posterior	300	4	anterior and posterior
4519	SteCoe_33168	Anterior	3	GGGV01018601.1	anterior	300	4	GGGV01018601.1	posterior	300	4	anterior and posterior
4606	SteCoe_23131	Tail	1	GGGV01017510.1	anterior	180	3	GGGV01017510.1	posterior	180	3	anterior and posterior
4616	SteCoe_29862	Tail	1	GGGV01003384.1	anterior	180	3	GGGV01003384.1	posterior	300	4	anterior and posterior
4631	SteCoe_37814	Tail	1	GGGV01014958.1	anterior	300	4	GGGV01014958.1	posterior	300	4	anterior and posterior
4680	SteCoe_14295	Bisection	1	GGGV01016672.1	anterior	300	4	GGGV01016672.1	posterior	90	2	anterior and posterior
4682	SteCoe_29240	Bisection	1	GGGV01009305.1	anterior	300	4	GGGV01009305.1	posterior	300	4	anterior and posterior
4745	SteCoe_168	Bisection	3	GGGV01041915.1	anterior	180	3	GGGV01041915.1	posterior	300	4	anterior and posterior
4775	SteCoe_36006	General	4	GGGV01000076.1	anterior	10	5	GGGV01000076.1	posterior	90	2	anterior and posterior
1	SteCoe_11507	OA_specific	1	NA	NA	NA	NA	GGGV01020526.1	posterior	300	4	posterior_only
3	SteCoe_12572	OA_specific	1	NA	NA	NA	NA	GGGV01016359.1	posterior	300	4	posterior_only
7	SteCoe_17003	OA_specific	1	NA	NA	NA	NA	GGGV01022670.1	posterior	300	4	posterior_only
8	SteCoe_17020	OA_specific	1	NA	NA	NA	NA	GGGV01027362.1	posterior	300	4	posterior_only
9	SteCoe_19597	OA_specific	1	NA	NA	NA	NA	GGGV01019333.1	posterior	300	4	posterior_only
11	SteCoe_25044	OA_specific	1	NA	NA	NA	NA	GGGV01007756.1	posterior	300	4	posterior_only
14	SteCoe_28597	OA_specific	1	NA	NA	NA	NA	GGGV01032132.1	posterior	300	4	posterior_only
19	SteCoe_30537	OA_specific	1	NA	NA	NA	NA	GGGV01031816.1	posterior	300	4	posterior_only
22	SteCoe_31974	OA_specific	1	NA	NA	NA	NA	GGGV01021526.1	posterior	180	3	posterior_only
24	SteCoe_34506	OA_specific	1	NA	NA	NA	NA	GGGV01019154.1	posterior	300	4	posterior_only
28	SteCoe_8304	OA_specific	1	NA	NA	NA	NA	GGGV01027192.1	posterior	300	4	posterior_only
124	SteCoe_23903	OA_specific	2	NA	NA	NA	NA	GGGV01022234.1	posterior	300	4	posterior_only
233	SteCoe_5035	OA_specific	2	NA	NA	NA	NA	GGGV01023290.1	posterior	300	4	posterior_only
298	SteCoe_1541	OA_specific	3	NA	NA	NA	NA	GGGV01021359.1	posterior	300	4	posterior_only
499	SteCoe_7235	OA_specific	4	NA	NA	NA	NA	GGGV01006795.1	posterior	300	4	posterior_only
517	SteCoe_12610	OA_specific	5	NA	NA	NA	NA	GGGV01029995.1	posterior	300	4	posterior_only
534	SteCoe_21613	OA_specific	5	NA	NA	NA	NA	GGGV01003513.1	posterior	180	3	posterior_only
580	SteCoe_3913	OA_specific	5	NA	NA	NA	NA	GGGV01035678.1	posterior	90	2	posterior_only
595	SteCoe_9538	OA_specific	5	NA	NA	NA	NA	GGGV01009174.1	posterior	90	2	posterior_only
619	SteCoe_11063	Sucrose	1	NA	NA	NA	NA	GGGV01034929.1	posterior	90	2	posterior_only
620	SteCoe_11086	Sucrose	1	NA	NA	NA	NA	GGGV01009664.1	posterior	300	4	posterior_only
638	SteCoe_11908	Sucrose	1	NA	NA	NA	NA	GGGV01002495.1	posterior	300	4	posterior_only
651	SteCoe_12790	Sucrose	1	NA	NA	NA	NA	GGGV01031068.1	posterior	300	4	posterior_only
653	SteCoe_1285	Sucrose	1	NA	NA	NA	NA	GGGV01029321.1	posterior	300	4	posterior_only
655	SteCoe_12941	Sucrose	1	NA	NA	NA	NA	GGGV01024678.1	posterior	300	4	posterior_only
661	SteCoe_13185	Sucrose	1	NA	NA	NA	NA	GGGV01040802.1	posterior	180	3	posterior_only
663	SteCoe_13323	Sucrose	1	NA	NA	NA	NA	GGGV01011196.1	posterior	300	4	posterior_only
670	SteCoe_13877	Sucrose	1	NA	NA	NA	NA	GGGV01025162.1	posterior	180	3	posterior_only
695	SteCoe_15139	Sucrose	1	NA	NA	NA	NA	GGGV01018805.1	posterior	300	4	posterior_only
702	SteCoe_15695	Sucrose	1	NA	NA	NA	NA	GGGV01020471.1	posterior	300	4	posterior_only
706	SteCoe_15931	Sucrose	1	NA	NA	NA	NA	GGGV01042139.1	posterior	300	4	posterior_only
714	SteCoe_16380	Sucrose	1	NA	NA	NA	NA	GGGV01009641.1	posterior	300	4	posterior_only
717	SteCoe_16470	Sucrose	1	NA	NA	NA	NA	GGGV01014621.1	posterior	300	4	posterior_only
719	SteCoe_16493	Sucrose	1	NA	NA	NA	NA	GGGV01040976.1	posterior	300	4	posterior_only
722	SteCoe_16706	Sucrose	1	NA	NA	NA	NA	GGGV01003844.1	posterior	300	4	posterior_only
744	SteCoe_17728	Sucrose	1	NA	NA	NA	NA	GGGV01028343.1	posterior	300	4	posterior_only
749	SteCoe_17868	Sucrose	1	NA	NA	NA	NA	GGGV01025056.1	posterior	300	4	posterior_only
754	SteCoe_18240	Sucrose	1	NA	NA	NA	NA	GGGV01022004.1	posterior	300	4	posterior_only
755	SteCoe_18258	Sucrose	1	NA	NA	NA	NA	GGGV01009699.1	posterior	300	4	posterior_only
757	SteCoe_18320	Sucrose	1	NA	NA	NA	NA	GGGV01006091.1	posterior	300	4	posterior_only
758	SteCoe_18374	Sucrose	1	NA	NA	NA	NA	GGGV01030236.1	posterior	300	4	posterior_only
759	SteCoe_18453	Sucrose	1	NA	NA	NA	NA	GGGV01016380.1	posterior	300	4	posterior_only
782	SteCoe_19714	Sucrose	1	NA	NA	NA	NA	GGGV01027111.1	posterior	300	4	posterior_only
786	SteCoe_19853	Sucrose	1	NA	NA	NA	NA	GGGV01026432.1	posterior	300	4	posterior_only
787	SteCoe_1989	Sucrose	1	NA	NA	NA	NA	GGGV01037814.1	posterior	300	4	posterior_only
796	SteCoe_20243	Sucrose	1	NA	NA	NA	NA	GGGV01024483.1	posterior	300	4	posterior_only
820	SteCoe_21468	Sucrose	1	NA	NA	NA	NA	GGGV01038941.1	posterior	90	2	posterior_only
823	SteCoe_21565	Sucrose	1	NA	NA	NA	NA	GGGV01033423.1	posterior	300	4	posterior_only
824	SteCoe_21608	Sucrose	1	NA	NA	NA	NA	GGGV01025554.1	posterior	300	4	posterior_only
843	SteCoe_22285	Sucrose	1	NA	NA	NA	NA	GGGV01012806.1	posterior	300	4	posterior_only
845	SteCoe_22335	Sucrose	1	NA	NA	NA	NA	GGGV01042299.1	posterior	300	4	posterior_only
859	SteCoe_23098	Sucrose	1	NA	NA	NA	NA	GGGV01038456.1	posterior	90	2	posterior_only
866	SteCoe_23484	Sucrose	1	NA	NA	NA	NA	GGGV01038169.1	posterior	300	4	posterior_only
870	SteCoe_23676	Sucrose	1	NA	NA	NA	NA	GGGV01001543.1	posterior	300	4	posterior_only
877	SteCoe_23955	Sucrose	1	NA	NA	NA	NA	GGGV01010866.1	posterior	300	4	posterior_only
879	SteCoe_23970	Sucrose	1	NA	NA	NA	NA	GGGV01025624.1	posterior	300	4	posterior_only
883	SteCoe_24108	Sucrose	1	NA	NA	NA	NA	GGGV01021940.1	posterior	180	3	posterior_only
894	SteCoe_24800	Sucrose	1	NA	NA	NA	NA	GGGV01005882.1	posterior	90	2	posterior_only
898	SteCoe_2520	Sucrose	1	NA	NA	NA	NA	GGGV01042549.1	posterior	300	4	posterior_only
899	SteCoe_25201	Sucrose	1	NA	NA	NA	NA	GGGV01012800.1	posterior	300	4	posterior_only
900	SteCoe_25257	Sucrose	1	NA	NA	NA	NA	GGGV01027935.1	posterior	300	4	posterior_only
901	SteCoe_25429	Sucrose	1	NA	NA	NA	NA	GGGV01035208.1	posterior	300	4	posterior_only
910	SteCoe_25934	Sucrose	1	NA	NA	NA	NA	GGGV01020063.1	posterior	300	4	posterior_only
913	SteCoe_2601	Sucrose	1	NA	NA	NA	NA	GGGV01023387.1	posterior	300	4	posterior_only
919	SteCoe_26228	Sucrose	1	NA	NA	NA	NA	GGGV01022824.1	posterior	300	4	posterior_only
920	SteCoe_26251	Sucrose	1	NA	NA	NA	NA	GGGV01033963.1	posterior	90	2	posterior_only
921	SteCoe_26263	Sucrose	1	NA	NA	NA	NA	GGGV01002426.1	posterior	300	4	posterior_only
923	SteCoe_26285	Sucrose	1	NA	NA	NA	NA	GGGV01005018.1	posterior	90	2	posterior_only
928	SteCoe_26384	Sucrose	1	NA	NA	NA	NA	GGGV01037076.1	posterior	300	4	posterior_only
943	SteCoe_27150	Sucrose	1	NA	NA	NA	NA	GGGV01017889.1	posterior	300	4	posterior_only
947	SteCoe_27416	Sucrose	1	NA	NA	NA	NA	GGGV01015441.1	posterior	300	4	posterior_only
959	SteCoe_27761	Sucrose	1	NA	NA	NA	NA	GGGV01034762.1	posterior	300	4	posterior_only
967	SteCoe_28246	Sucrose	1	NA	NA	NA	NA	GGGV01000533.1	posterior	300	4	posterior_only
974	SteCoe_28365	Sucrose	1	NA	NA	NA	NA	GGGV01007277.1	posterior	300	4	posterior_only
984	SteCoe_28973	Sucrose	1	NA	NA	NA	NA	GGGV01008271.1	posterior	300	4	posterior_only
985	SteCoe_28975	Sucrose	1	NA	NA	NA	NA	GGGV01017288.1	posterior	300	4	posterior_only
998	SteCoe_29405	Sucrose	1	NA	NA	NA	NA	GGGV01008554.1	posterior	300	4	posterior_only
1001	SteCoe_29669	Sucrose	1	NA	NA	NA	NA	GGGV01012388.1	posterior	300	4	posterior_only
1002	SteCoe_297	Sucrose	1	NA	NA	NA	NA	GGGV01025297.1	posterior	300	4	posterior_only
1010	SteCoe_29981	Sucrose	1	NA	NA	NA	NA	GGGV01018235.1	posterior	300	4	posterior_only
1013	SteCoe_30220	Sucrose	1	NA	NA	NA	NA	GGGV01005716.1	posterior	300	4	posterior_only
1014	SteCoe_30247	Sucrose	1	NA	NA	NA	NA	GGGV01014236.1	posterior	300	4	posterior_only
1026	SteCoe_30910	Sucrose	1	NA	NA	NA	NA	GGGV01023512.1	posterior	180	3	posterior_only
1030	SteCoe_31194	Sucrose	1	NA	NA	NA	NA	GGGV01025442.1	posterior	300	4	posterior_only
1034	SteCoe_31338	Sucrose	1	NA	NA	NA	NA	GGGV01025086.1	posterior	300	4	posterior_only
1039	SteCoe_31533	Sucrose	1	NA	NA	NA	NA	GGGV01037734.1	posterior	300	4	posterior_only
1041	SteCoe_31581	Sucrose	1	NA	NA	NA	NA	GGGV01025958.1	posterior	300	4	posterior_only
1042	SteCoe_31582	Sucrose	1	NA	NA	NA	NA	GGGV01005345.1	posterior	300	4	posterior_only
1055	SteCoe_3265	Sucrose	1	NA	NA	NA	NA	GGGV01004814.1	posterior	300	4	posterior_only
1057	SteCoe_32782	Sucrose	1	NA	NA	NA	NA	GGGV01040982.1	posterior	300	4	posterior_only
1064	SteCoe_33242	Sucrose	1	NA	NA	NA	NA	GGGV01012750.1	posterior	300	4	posterior_only
1093	SteCoe_34741	Sucrose	1	NA	NA	NA	NA	GGGV01005005.1	posterior	300	4	posterior_only
1095	SteCoe_34847	Sucrose	1	NA	NA	NA	NA	GGGV01010539.1	posterior	300	4	posterior_only
1099	SteCoe_35260	Sucrose	1	NA	NA	NA	NA	GGGV01001795.1	posterior	300	4	posterior_only
1109	SteCoe_35641	Sucrose	1	NA	NA	NA	NA	GGGV01026531.1	posterior	300	4	posterior_only
1115	SteCoe_35953	Sucrose	1	NA	NA	NA	NA	GGGV01029815.1	posterior	300	4	posterior_only
1128	SteCoe_36448	Sucrose	1	NA	NA	NA	NA	GGGV01004856.1	posterior	300	4	posterior_only
1144	SteCoe_37489	Sucrose	1	NA	NA	NA	NA	GGGV01038904.1	posterior	180	3	posterior_only
1148	SteCoe_37669	Sucrose	1	NA	NA	NA	NA	GGGV01028694.1	posterior	300	4	posterior_only
1151	SteCoe_37931	Sucrose	1	NA	NA	NA	NA	GGGV01035173.1	posterior	300	4	posterior_only
1154	SteCoe_38290	Sucrose	1	NA	NA	NA	NA	GGGV01040088.1	posterior	90	2	posterior_only
1159	SteCoe_386	Sucrose	1	NA	NA	NA	NA	GGGV01006375.1	posterior	300	4	posterior_only
1178	SteCoe_4661	Sucrose	1	NA	NA	NA	NA	GGGV01036700.1	posterior	300	4	posterior_only
1180	SteCoe_4827	Sucrose	1	NA	NA	NA	NA	GGGV01017625.1	posterior	300	4	posterior_only
1183	SteCoe_494	Sucrose	1	NA	NA	NA	NA	GGGV01034272.1	posterior	300	4	posterior_only
1206	SteCoe_6073	Sucrose	1	NA	NA	NA	NA	GGGV01033530.1	posterior	300	4	posterior_only
1209	SteCoe_6230	Sucrose	1	NA	NA	NA	NA	GGGV01017162.1	posterior	300	4	posterior_only
1214	SteCoe_6427	Sucrose	1	NA	NA	NA	NA	GGGV01012087.1	posterior	300	4	posterior_only
1215	SteCoe_6518	Sucrose	1	NA	NA	NA	NA	GGGV01018319.1	posterior	300	4	posterior_only
1217	SteCoe_6556	Sucrose	1	NA	NA	NA	NA	GGGV01028758.1	posterior	180	3	posterior_only
1219	SteCoe_6611	Sucrose	1	NA	NA	NA	NA	GGGV01002488.1	posterior	300	4	posterior_only
1263	SteCoe_8517	Sucrose	1	NA	NA	NA	NA	GGGV01004370.1	posterior	90	2	posterior_only
1267	SteCoe_8609	Sucrose	1	NA	NA	NA	NA	GGGV01026085.1	posterior	300	4	posterior_only
1273	SteCoe_9191	Sucrose	1	NA	NA	NA	NA	GGGV01032911.1	posterior	300	4	posterior_only
1276	SteCoe_9438	Sucrose	1	NA	NA	NA	NA	GGGV01002821.1	posterior	90	2	posterior_only
1279	SteCoe_9537	Sucrose	1	NA	NA	NA	NA	GGGV01017544.1	posterior	300	4	posterior_only
1289	SteCoe_9895	Sucrose	1	NA	NA	NA	NA	GGGV01031197.1	posterior	300	4	posterior_only
1329	SteCoe_11352	Sucrose	2	NA	NA	NA	NA	GGGV01023646.1	posterior	300	4	posterior_only
1348	SteCoe_12108	Sucrose	2	NA	NA	NA	NA	GGGV01022205.1	posterior	300	4	posterior_only
1357	SteCoe_1236	Sucrose	2	NA	NA	NA	NA	GGGV01005269.1	posterior	180	3	posterior_only
1369	SteCoe_12932	Sucrose	2	NA	NA	NA	NA	GGGV01034474.1	posterior	300	4	posterior_only
1383	SteCoe_13335	Sucrose	2	NA	NA	NA	NA	GGGV01015140.1	posterior	180	3	posterior_only
1385	SteCoe_13430	Sucrose	2	NA	NA	NA	NA	GGGV01002827.1	posterior	300	4	posterior_only
1436	SteCoe_15672	Sucrose	2	NA	NA	NA	NA	GGGV01017065.1	posterior	300	4	posterior_only
1559	SteCoe_21107	Sucrose	2	NA	NA	NA	NA	GGGV01001521.1	posterior	90	2	posterior_only
1622	SteCoe_24470	Sucrose	2	NA	NA	NA	NA	GGGV01008177.1	posterior	300	4	posterior_only
1664	SteCoe_25867	Sucrose	2	NA	NA	NA	NA	GGGV01000890.1	posterior	300	4	posterior_only
1686	SteCoe_26916	Sucrose	2	NA	NA	NA	NA	GGGV01019052.1	posterior	300	4	posterior_only
1765	SteCoe_30497	Sucrose	2	NA	NA	NA	NA	GGGV01022179.1	posterior	180	3	posterior_only
1785	SteCoe_31656	Sucrose	2	NA	NA	NA	NA	GGGV01003068.1	posterior	300	4	posterior_only
1821	SteCoe_33558	Sucrose	2	NA	NA	NA	NA	GGGV01009184.1	posterior	300	4	posterior_only
1850	SteCoe_35572	Sucrose	2	NA	NA	NA	NA	GGGV01002768.1	posterior	180	3	posterior_only
1894	SteCoe_38137	Sucrose	2	NA	NA	NA	NA	GGGV01025164.1	posterior	180	3	posterior_only
1922	SteCoe_4923	Sucrose	2	NA	NA	NA	NA	GGGV01022246.1	posterior	180	3	posterior_only
1928	SteCoe_5068	Sucrose	2	NA	NA	NA	NA	GGGV01011488.1	posterior	300	4	posterior_only
1970	SteCoe_7114	Sucrose	2	NA	NA	NA	NA	GGGV01038574.1	posterior	300	4	posterior_only
1980	SteCoe_763	Sucrose	2	NA	NA	NA	NA	GGGV01001520.1	posterior	180	3	posterior_only
2022	SteCoe_9175	Sucrose	2	NA	NA	NA	NA	GGGV01001545.1	posterior	300	4	posterior_only
2024	SteCoe_9382	Sucrose	2	NA	NA	NA	NA	GGGV01035138.1	posterior	300	4	posterior_only
2046	SteCoe_10343	Sucrose	3	NA	NA	NA	NA	GGGV01033377.1	posterior	300	4	posterior_only
2115	SteCoe_12675	Sucrose	3	NA	NA	NA	NA	GGGV01041777.1	posterior	90	2	posterior_only
2134	SteCoe_1342	Sucrose	3	NA	NA	NA	NA	GGGV01005129.1	posterior	300	4	posterior_only
2163	SteCoe_14550	Sucrose	3	NA	NA	NA	NA	GGGV01040991.1	posterior	180	3	posterior_only
2223	SteCoe_16546	Sucrose	3	NA	NA	NA	NA	GGGV01032281.1	posterior	300	4	posterior_only
2275	SteCoe_18388	Sucrose	3	NA	NA	NA	NA	GGGV01027181.1	posterior	300	4	posterior_only
2293	SteCoe_18748	Sucrose	3	NA	NA	NA	NA	GGGV01022467.1	posterior	300	4	posterior_only
2305	SteCoe_19324	Sucrose	3	NA	NA	NA	NA	GGGV01026218.1	posterior	180	3	posterior_only
2366	SteCoe_21806	Sucrose	3	NA	NA	NA	NA	GGGV01011730.1	posterior	300	4	posterior_only
2394	SteCoe_23244	Sucrose	3	NA	NA	NA	NA	GGGV01013857.1	posterior	300	4	posterior_only
2437	SteCoe_2464	Sucrose	3	NA	NA	NA	NA	GGGV01017118.1	posterior	90	2	posterior_only
2454	SteCoe_25118	Sucrose	3	NA	NA	NA	NA	GGGV01031497.1	posterior	90	2	posterior_only
2496	SteCoe_26784	Sucrose	3	NA	NA	NA	NA	GGGV01025158.1	posterior	300	4	posterior_only
2513	SteCoe_27379	Sucrose	3	NA	NA	NA	NA	GGGV01021680.1	posterior	300	4	posterior_only
2571	SteCoe_2930	Sucrose	3	NA	NA	NA	NA	GGGV01035216.1	posterior	300	4	posterior_only
2607	SteCoe_30635	Sucrose	3	NA	NA	NA	NA	GGGV01033621.1	posterior	300	4	posterior_only
2614	SteCoe_30934	Sucrose	3	NA	NA	NA	NA	GGGV01032026.1	posterior	300	4	posterior_only
2634	SteCoe_32061	Sucrose	3	NA	NA	NA	NA	GGGV01028299.1	posterior	300	4	posterior_only
2660	SteCoe_32959	Sucrose	3	NA	NA	NA	NA	GGGV01028581.1	posterior	180	3	posterior_only
2698	SteCoe_34362	Sucrose	3	NA	NA	NA	NA	GGGV01015416.1	posterior	180	3	posterior_only
2742	SteCoe_3648	Sucrose	3	NA	NA	NA	NA	GGGV01009799.1	posterior	300	4	posterior_only
2749	SteCoe_3670	Sucrose	3	NA	NA	NA	NA	GGGV01027694.1	posterior	180	3	posterior_only
2806	SteCoe_5454	Sucrose	3	NA	NA	NA	NA	GGGV01013395.1	posterior	300	4	posterior_only
2815	SteCoe_5778	Sucrose	3	NA	NA	NA	NA	GGGV01013119.1	posterior	180	3	posterior_only
2844	SteCoe_6806	Sucrose	3	NA	NA	NA	NA	GGGV01022918.1	posterior	300	4	posterior_only
2876	SteCoe_822	Sucrose	3	NA	NA	NA	NA	GGGV01004932.1	posterior	300	4	posterior_only
2936	SteCoe_10607	Sucrose	4	NA	NA	NA	NA	GGGV01020321.1	posterior	300	4	posterior_only
2973	SteCoe_12013	Sucrose	4	NA	NA	NA	NA	GGGV01002011.1	posterior	90	2	posterior_only
3007	SteCoe_13161	Sucrose	4	NA	NA	NA	NA	GGGV01030653.1	posterior	300	4	posterior_only
3067	SteCoe_15531	Sucrose	4	NA	NA	NA	NA	GGGV01026453.1	posterior	300	4	posterior_only
3073	SteCoe_1584	Sucrose	4	NA	NA	NA	NA	GGGV01007241.1	posterior	300	4	posterior_only
3098	SteCoe_16770	Sucrose	4	NA	NA	NA	NA	GGGV01012534.1	posterior	90	2	posterior_only
3142	SteCoe_18667	Sucrose	4	NA	NA	NA	NA	GGGV01011808.1	posterior	180	3	posterior_only
3186	SteCoe_20775	Sucrose	4	NA	NA	NA	NA	GGGV01003023.1	posterior	300	4	posterior_only
3187	SteCoe_20788	Sucrose	4	NA	NA	NA	NA	GGGV01037652.1	posterior	300	4	posterior_only
3188	SteCoe_20790	Sucrose	4	NA	NA	NA	NA	GGGV01011761.1	posterior	300	4	posterior_only
3197	SteCoe_21086	Sucrose	4	NA	NA	NA	NA	GGGV01018687.1	posterior	300	4	posterior_only
3198	SteCoe_21090	Sucrose	4	NA	NA	NA	NA	GGGV01032191.1	posterior	10	1	posterior_only
3199	SteCoe_21090	Sucrose	4	NA	NA	NA	NA	GGGV01032191.1	posterior	300	4	posterior_only
3246	SteCoe_22431	Sucrose	4	NA	NA	NA	NA	GGGV01011505.1	posterior	300	4	posterior_only
3297	SteCoe_23993	Sucrose	4	NA	NA	NA	NA	GGGV01027555.1	posterior	300	4	posterior_only
3319	SteCoe_24736	Sucrose	4	NA	NA	NA	NA	GGGV01026872.1	posterior	90	2	posterior_only
3355	SteCoe_26446	Sucrose	4	NA	NA	NA	NA	GGGV01037143.1	posterior	300	4	posterior_only
3375	SteCoe_27527	Sucrose	4	NA	NA	NA	NA	GGGV01039274.1	posterior	180	3	posterior_only
3387	SteCoe_27941	Sucrose	4	NA	NA	NA	NA	GGGV01005237.1	posterior	300	4	posterior_only
3439	SteCoe_29769	Sucrose	4	NA	NA	NA	NA	GGGV01009403.1	posterior	90	2	posterior_only
3461	SteCoe_3075	Sucrose	4	NA	NA	NA	NA	GGGV01040527.1	posterior	300	4	posterior_only
3471	SteCoe_31162	Sucrose	4	NA	NA	NA	NA	GGGV01035806.1	posterior	90	2	posterior_only
3476	SteCoe_31473	Sucrose	4	NA	NA	NA	NA	GGGV01037364.1	posterior	180	3	posterior_only
3502	SteCoe_32488	Sucrose	4	NA	NA	NA	NA	GGGV01011267.1	posterior	300	4	posterior_only
3593	SteCoe_38014	Sucrose	4	NA	NA	NA	NA	GGGV01031809.1	posterior	90	2	posterior_only
3633	SteCoe_5052	Sucrose	4	NA	NA	NA	NA	GGGV01025801.1	posterior	300	4	posterior_only
3648	SteCoe_5525	Sucrose	4	NA	NA	NA	NA	GGGV01039193.1	posterior	300	4	posterior_only
3700	SteCoe_7223	Sucrose	4	NA	NA	NA	NA	GGGV01002770.1	posterior	300	4	posterior_only
3754	SteCoe_9491	Sucrose	4	NA	NA	NA	NA	GGGV01001449.1	posterior	300	4	posterior_only
3772	SteCoe_10204	Sucrose	5	NA	NA	NA	NA	GGGV01022742.1	posterior	300	4	posterior_only
3801	SteCoe_1174	Sucrose	5	NA	NA	NA	NA	GGGV01032910.1	posterior	180	3	posterior_only
3815	SteCoe_12782	Sucrose	5	NA	NA	NA	NA	GGGV01007328.1	posterior	300	4	posterior_only
3833	SteCoe_14102	Sucrose	5	NA	NA	NA	NA	GGGV01029351.1	posterior	90	2	posterior_only
3856	SteCoe_15110	Sucrose	5	NA	NA	NA	NA	GGGV01039000.1	posterior	300	4	posterior_only
3859	SteCoe_1531	Sucrose	5	NA	NA	NA	NA	GGGV01035055.1	posterior	90	2	posterior_only
3869	SteCoe_15702	Sucrose	5	NA	NA	NA	NA	GGGV01022832.1	posterior	300	4	posterior_only
3876	SteCoe_16269	Sucrose	5	NA	NA	NA	NA	GGGV01023871.1	posterior	180	3	posterior_only
3883	SteCoe_16767	Sucrose	5	NA	NA	NA	NA	GGGV01009536.1	posterior	300	4	posterior_only
3888	SteCoe_16948	Sucrose	5	NA	NA	NA	NA	GGGV01023468.1	posterior	300	4	posterior_only
3893	SteCoe_17310	Sucrose	5	NA	NA	NA	NA	GGGV01004711.1	posterior	300	4	posterior_only
3904	SteCoe_17862	Sucrose	5	NA	NA	NA	NA	GGGV01005694.1	posterior	90	2	posterior_only
3911	SteCoe_1849	Sucrose	5	NA	NA	NA	NA	GGGV01018052.1	posterior	300	4	posterior_only
3934	SteCoe_20211	Sucrose	5	NA	NA	NA	NA	GGGV01015653.1	posterior	300	4	posterior_only
3955	SteCoe_21604	Sucrose	5	NA	NA	NA	NA	GGGV01006485.1	posterior	300	4	posterior_only
3981	SteCoe_2327	Sucrose	5	NA	NA	NA	NA	GGGV01042044.1	posterior	180	3	posterior_only
3993	SteCoe_24211	Sucrose	5	NA	NA	NA	NA	GGGV01034018.1	posterior	90	2	posterior_only
4001	SteCoe_24888	Sucrose	5	NA	NA	NA	NA	GGGV01020383.1	posterior	180	3	posterior_only
4017	SteCoe_25767	Sucrose	5	NA	NA	NA	NA	GGGV01029839.1	posterior	300	4	posterior_only
4020	SteCoe_25873	Sucrose	5	NA	NA	NA	NA	GGGV01041112.1	posterior	90	2	posterior_only
4052	SteCoe_28233	Sucrose	5	NA	NA	NA	NA	GGGV01020764.1	posterior	180	3	posterior_only
4061	SteCoe_28828	Sucrose	5	NA	NA	NA	NA	GGGV01015414.1	posterior	300	4	posterior_only
4062	SteCoe_28831	Sucrose	5	NA	NA	NA	NA	GGGV01010344.1	posterior	300	4	posterior_only
4089	SteCoe_30983	Sucrose	5	NA	NA	NA	NA	GGGV01027240.1	posterior	90	2	posterior_only
4092	SteCoe_31113	Sucrose	5	NA	NA	NA	NA	GGGV01025361.1	posterior	300	4	posterior_only
4099	SteCoe_31389	Sucrose	5	NA	NA	NA	NA	GGGV01037749.1	posterior	90	2	posterior_only
4126	SteCoe_33648	Sucrose	5	NA	NA	NA	NA	GGGV01033816.1	posterior	300	4	posterior_only
4132	SteCoe_34156	Sucrose	5	NA	NA	NA	NA	GGGV01007718.1	posterior	180	3	posterior_only
4164	SteCoe_36255	Sucrose	5	NA	NA	NA	NA	GGGV01015683.1	posterior	300	4	posterior_only
4171	SteCoe_36850	Sucrose	5	NA	NA	NA	NA	GGGV01007688.1	posterior	90	2	posterior_only
4172	SteCoe_3690	Sucrose	5	NA	NA	NA	NA	GGGV01007383.1	posterior	180	3	posterior_only
4190	SteCoe_4187	Sucrose	5	NA	NA	NA	NA	GGGV01009508.1	posterior	300	4	posterior_only
4193	SteCoe_4270	Sucrose	5	NA	NA	NA	NA	GGGV01001782.1	posterior	300	4	posterior_only
4238	SteCoe_7312	Sucrose	5	NA	NA	NA	NA	GGGV01001003.1	posterior	300	4	posterior_only
4244	SteCoe_76	Sucrose	5	NA	NA	NA	NA	GGGV01020720.1	posterior	300	4	posterior_only
4291	SteCoe_3940	Anterior	1	NA	NA	NA	NA	GGGV01006280.1	posterior	300	4	posterior_only
4293	SteCoe_13226	Anterior	1	NA	NA	NA	NA	GGGV01039456.1	posterior	300	4	posterior_only
4294	SteCoe_29651	Anterior	1	NA	NA	NA	NA	GGGV01013152.1	posterior	300	4	posterior_only
4299	SteCoe_10733	Anterior	1	NA	NA	NA	NA	GGGV01020141.1	posterior	300	4	posterior_only
4300	SteCoe_1624	Anterior	1	NA	NA	NA	NA	GGGV01011455.1	posterior	300	4	posterior_only
4303	SteCoe_6848	Anterior	1	NA	NA	NA	NA	GGGV01022969.1	posterior	300	4	posterior_only
4305	SteCoe_25990	Anterior	1	NA	NA	NA	NA	GGGV01009960.1	posterior	300	4	posterior_only
4309	SteCoe_28649	Anterior	1	NA	NA	NA	NA	GGGV01023687.1	posterior	300	4	posterior_only
4310	SteCoe_23114	Anterior	1	NA	NA	NA	NA	GGGV01012323.1	posterior	300	4	posterior_only
4314	SteCoe_36702	Anterior	1	NA	NA	NA	NA	GGGV01039145.1	posterior	300	4	posterior_only
4321	SteCoe_13401	Anterior	1	NA	NA	NA	NA	GGGV01000627.1	posterior	300	4	posterior_only
4326	SteCoe_34298	Anterior	1	NA	NA	NA	NA	GGGV01002136.1	posterior	180	3	posterior_only
4344	SteCoe_9362	Anterior	1	NA	NA	NA	NA	GGGV01004132.1	posterior	300	4	posterior_only
4345	SteCoe_9735	Anterior	1	NA	NA	NA	NA	GGGV01008626.1	posterior	300	4	posterior_only
4419	SteCoe_20641	Anterior	2	NA	NA	NA	NA	GGGV01041733.1	posterior	300	4	posterior_only
4459	SteCoe_25313	Anterior	2	NA	NA	NA	NA	GGGV01028146.1	posterior	10	1	posterior_only
4460	SteCoe_25313	Anterior	2	NA	NA	NA	NA	GGGV01028146.1	posterior	180	3	posterior_only
4475	SteCoe_35680	Anterior	2	NA	NA	NA	NA	GGGV01002294.1	posterior	300	4	posterior_only
4489	SteCoe_32974	Anterior	3	NA	NA	NA	NA	GGGV01026969.1	posterior	180	3	posterior_only
4535	SteCoe_13456	Anterior	3	NA	NA	NA	NA	GGGV01008290.1	posterior	300	4	posterior_only
4546	SteCoe_32071	Anterior	3	NA	NA	NA	NA	GGGV01022727.1	posterior	300	4	posterior_only
4561	SteCoe_26523	Anterior	3	NA	NA	NA	NA	GGGV01002359.1	posterior	300	4	posterior_only
4574	SteCoe_36440	Anterior	3	NA	NA	NA	NA	GGGV01007141.1	posterior	90	2	posterior_only
4608	SteCoe_23725	Tail	1	NA	NA	NA	NA	GGGV01014752.1	posterior	300	4	posterior_only
4615	SteCoe_28000	Tail	1	NA	NA	NA	NA	GGGV01040056.1	posterior	90	2	posterior_only
4637	SteCoe_787	Tail	1	NA	NA	NA	NA	GGGV01013955.1	posterior	300	4	posterior_only
4638	SteCoe_8269	Tail	1	NA	NA	NA	NA	GGGV01027066.1	posterior	300	4	posterior_only
4645	SteCoe_15440	Tail	2	NA	NA	NA	NA	GGGV01011400.1	posterior	300	4	posterior_only
4646	SteCoe_28615	Tail	2	NA	NA	NA	NA	GGGV01024235.1	posterior	300	4	posterior_only
4653	SteCoe_9428	Tail	2	NA	NA	NA	NA	GGGV01006684.1	posterior	300	4	posterior_only
4662	SteCoe_25929	Bisection	1	NA	NA	NA	NA	GGGV01038338.1	posterior	300	4	posterior_only
4678	SteCoe_28553	Bisection	1	NA	NA	NA	NA	GGGV01031144.1	posterior	90	2	posterior_only
4692	SteCoe_29652	Bisection	1	NA	NA	NA	NA	GGGV01001379.1	posterior	300	4	posterior_only
4699	SteCoe_27981	Bisection	2	NA	NA	NA	NA	GGGV01004922.1	posterior	300	4	posterior_only
4704	SteCoe_13816	Bisection	2	NA	NA	NA	NA	GGGV01010012.1	posterior	300	4	posterior_only
4706	SteCoe_26895	Bisection	2	NA	NA	NA	NA	GGGV01009585.1	posterior	300	4	posterior_only
4722	SteCoe_2628	Bisection	2	NA	NA	NA	NA	GGGV01041876.1	posterior	300	4	posterior_only
4723	SteCoe_9240	Bisection	2	NA	NA	NA	NA	GGGV01018970.1	posterior	300	4	posterior_only
4730	SteCoe_20625	Bisection	2	NA	NA	NA	NA	GGGV01028848.1	posterior	300	4	posterior_only
4735	SteCoe_3102	Bisection	2	NA	NA	NA	NA	GGGV01008804.1	posterior	300	4	posterior_only
4741	SteCoe_37123	Bisection	3	NA	NA	NA	NA	GGGV01035342.1	posterior	180	3	posterior_only
4754	SteCoe_23436	General	1	NA	NA	NA	NA	GGGV01034597.1	posterior	300	4	posterior_only
4757	SteCoe_30592	General	1	NA	NA	NA	NA	GGGV01020599.1	posterior	300	4	posterior_only
4759	SteCoe_27284	General	1	NA	NA	NA	NA	GGGV01000528.1	posterior	300	4	posterior_only
