# Supplementary material for: Modular, cascade-like transcriptional program of regeneration in Stentor
Source: eLife. 2022 Aug 4;11:e80778. doi: 10.7554/eLife.80778 (PMC9371601; doi:10.7554/eLife.80778)
Supplement: Supplementary file 8. [file elife-80778-supp8.xlsx]

## Sheet: Sheet1
information from Table S1 of Wenemoser et al . 2012 listing genes upregulated during wound healing and regenereation in S. mediterranea
find V3 sequence from V2 ID by text search at https://planmine.mpibpc.mpg.de/planmine/keywordSearchResults.do?searchTerm=SMED_06551_V2&searchSubmit=Search
then use blatx to search the fasta V3 against the stentor protein database
remove any genes where there was either no V3 hit from the V2 ID or no Stentor hit from the V3 sequence - so number is less than in the original table from Wenemoser
Gene ID	Top human BLAST hit	W class*	Stentor ortholog (blastx)	Stentor gene description	Stentor Regeneration Program
SMED_34297_V2	suppression of tumorigenicity 13 (colon carcinoma) (Hsp70 interacting protein)	W2	SteCoe_11246	TPR_2 domain protein
SMED_10026_V2	small G protein signaling modulator 1	W1	SteCoe_11515	RabGAP-TBC domain protein
SMED_00466_V2	calreticulin	W2	SteCoe_13010	Calreticulin domain protein	bisection 1
SMED_12880_V2	TNF receptor-associated factor 2	W3	SteCoe_13472	zf-C3HC4_2 domain protein
SMED_01947_V2	MYC binding protein 2	W1	SteCoe_14579	zf-RING_2 domain protein
SMED_06912_V2	protein phosphatase 1, regulatory (inhibitor) subunit 3B	W1	SteCoe_14863	hypothetical
SMED_06866_V2	bromodomain and WD repeat domain containing 1	W1	SteCoe_15548	NT-C2 domain protein	sucrose 3
SMED_11730_V2	solute carrier family 35, member B1	W2	SteCoe_16357	UAA domain protein
SMED_08031_V2	enolase 3 (beta, muscle)	W1	SteCoe_16380	enolase	sucrose 1
SMED_10303_V2	B-cell CLL/lymphoma 3	W2	SteCoe_18304	Prp19 domain protein
SMED_27198_V2	peptidoglycan recognition protein 4	W1	SteCoe_18379	Laminin_G_3 domain protein
SMED_31833_V2	follistatin	W2	SteCoe_21650	hypothetical
SMED_20770_V2	solute carrier family 33 (acetyl-CoA transporter), member 1	W2	SteCoe_21895	Acatn domain protein
SMED_09630_V2	pannexin 2	W2	SteCoe_22092	WD40 domain protein
SMED_28394_V2	RAB5B, member RAS oncogene family	W1	SteCoe_22422	Ras domain protein
SMED_19658_V2	ankyrin repeat domain 62	W1	SteCoe_2251	zf-C3HC4_2 domain protein
SMED_23290_V2	fyn-related kinase	W2	SteCoe_22874	TKL related kinase	sucrose 5
SMED_07471_V2	early growth response 1	W1	SteCoe_23356	zf-C2H2_4 domain protein
SMED_03008_V2	GRB2-associated binding protein 3	W1	SteCoe_23698	hypothetical
SMED_05374_V2	receptor tyrosine kinase-like orphan receptor 1	W1	SteCoe_24882	STE11 family kinase
SMED_07433_V2	FYN oncogene related to SRC, FGR, YES	W1	SteCoe_24962	TKL related kinase
SMED_23374_V2	FYN2	W2	SteCoe_24962	TKL related kinase
SMED_13944_V2	SET domain containing 1B	W1	SteCoe_26223	Bromo domain protein
SMED_07335_V2	slit homolog 2 (Drosophila)	W2	SteCoe_263	Ank_2 domain protein
SMED_01480_V2	p21 protein (Cdc42/Rac)-activated kinase 3	W1	SteCoe_26450	PAKA subfamily kinase
SMED_08080_V2	four and a half LIM domains 2	W2	SteCoe_26810	Hist_deacetyl domain protein	sucrose 5
SMED_32367_V2	actin, alpha 2, smooth muscle, aorta	W2	SteCoe_27385	actin	OA 2
SMED_00079_V2	actin, beta	W1	SteCoe_27385	actin	OA 2
SMED_03391_V2	actin, gamma 1	W2	SteCoe_27385	actin	OA 2
SMED_13474_V2	leucine rich repeat and fibronectin type III domain containing 5	W1	SteCoe_28667	Ank_2 domain protein
SMED_06551_V2	pim-3 oncogene-2	W1	SteCoe_28846	AMPK subfamily kinase
SMED_04997_V2	ornithine decarboxylase 1	W2	SteCoe_29813	Orn_Arg_deC_N domain protein
SMED_05460_V2	WAP, follistatin/kazal, immunoglobulin, kunitz and netrin domain containing 2	W2	SteCoe_30228	rve domain protein
SMED_10286_V2	IQ motif and Sec7 domain 1	W2	SteCoe_31343	DCB domain protein
SMED_04273_V2	pim-3 oncogene	W1	SteCoe_32146	AMPK subfamily kinase	sucrose 2
SMED_05022_V2	heparan sulfate proteoglycan 2	W2	SteCoe_32251	Actin domain protein
SMED_00025_V2	prostaglandin D2 synthase, hematopoietic	W1	SteCoe_32901	hypothetical
SMED_20251_V2	early growth response 2 (Krox-20 homolog, Drosophila)	W1	SteCoe_33400	hypothetical
SMED_02317_V2	high-mobility group box 2	W2	SteCoe_33537	hypothetical
SMED_27240_V2	plasminogen	W3	SteCoe_3390	WD40 domain protein
SMED_02872_V2	forkhead box A2	W1	SteCoe_34579	hypothetical
SMED_14072_V2	baculoviral IAP repeat-containing 3	W1	SteCoe_35203	hypothetical
SMED_01516_V2	SWI/SNF related, matrix associated, actin dependent regulator of chromatin, subfamily c, member 2	W1	SteCoe_35755	hypothetical
SMED_07121_V2	TNF receptor-associated factor 6	W2	SteCoe_36501	zf-C3HC4_2 domain protein
SMED_00935_V2	host cell factor C1 (VP16-accessory protein)	W1	SteCoe_36604	Kelch_4 domain protein
SMED_29274_V2	ADAM metallopeptidase with thrombospondin type 1 motif, 20	W2	SteCoe_36997	HATPase_c domain protein	OA 2
SMED_13647_V2	thyroid hormone receptor, beta (erythroblastic leukemia viral (v-erb-a) oncogene homolog 2, avian)	W2	SteCoe_37129	CENP-B_N domain protein
SMED_02705_V2	von Willebrand factor A domain-containing protein 5A isoform 1	W1	SteCoe_3795	VIT domain protein	Tail 1
SMED_02433_V2	mitogen-activated protein kinase kinase kinase 1	W1	SteCoe_38314	STE11 family kinase
SMED_06068_V2	pim-1 oncogene	W1	SteCoe_4237	CAMKL family kinase
SMED_06569_V2	tubulin, alpha 1b	W2	SteCoe_5138	alpha tubulin
SMED_07231_V2	tubulin, alpha 1c	W1	SteCoe_5138	alpha tubulin
SMED_02031_V2	tubulin, alpha 3d	W1	SteCoe_5138	alpha tubulin
SMED_01879_V2	tubulin, alpha 4a	W1	SteCoe_5138	alpha tubulin
SMED_03061_V2	basic leucine zipper transcription factor, ATF-like 3	W1	SteCoe_6391	hypothetical	sucrose 5
SMED_01454_V2	multiple EGF-like-domains 6	W2	SteCoe_803	Kelch_4 domain protein
SMED_09699_V2	surfeit 4	W2	SteCoe_8277	HTH_44 domain protein
SMED_00097_V2	transmembrane protein 111	W1	SteCoe_9122	DUF106 domain protein
W1=wound-induced 1; W2=wound-induced 2; W3=wound-induced 3
for Stentor data cluster 1 for each sample indicates genes that are down-regulated rather than up-regulated
12 of 63 genes show differential expression		0.190476
9 of 63 genes are upregulated in Stentor		0.142857
4775 Stentor genes show differential expression during regeneraiton (up or down)
total Stentor genome is 34494 gene models based on grep -c of the protein file download		so the fraction of genes that are differentialy expressed is			0.13843
so if we pick 63 genes at random, the expected number that will fortuitously show differential expression is 63 * (4775/34494) =				8.72108
