# Supplementary material for: Modular, cascade-like transcriptional program of regeneration in Stentor
Source: eLife. 2022 Aug 4;11:e80778. doi: 10.7554/eLife.80778 (PMC9371601; doi:10.7554/eLife.80778)
Supplement: Supplementary file 9. [file elife-80778-supp9.xlsx]

## Sheet: combined_table_RNAseq
	Gene	Gene_Group	Cluster	ext_gene	ID	LRT_qval	X2dpi.0dpi_qval	X4dpi.0dpi_qval	X7dpi.0dpi_qval	X12dpi.0dpi_qval	X2dpi.0dpi_LFC	X4dpi.0dpi_LFC	X7dpi.0dpi_LFC	X12dpi.0dpi_LFC
4702	SteCoe_29645	Bisection	1	SNRPG	ENSDART00000172069	0.0147533	0.00778694	0.00327835	0.0655866	0.952348	0.452167	0.481062	0.338564	0.0588213
4717	SteCoe_26895	Bisection	2	KIF1B	ENSDART00000165744	0.00127699	0.958207	0.474419	0.00322162	0.00614566	-0.0186859	-0.126033	0.34032	0.347744
4732	SteCoe_17463	Bisection	2	PMM1	ENSDART00000056035	0.0190757	0.0531013	0.00134744	0.00407108	0.649191	-0.318342	-0.457173	-0.421149	-0.159829
4764	SteCoe_8973	Bisection	3	ANKIB1A	ENSDART00000133628	0.00444757	0.00372138	0.0116508	0.000111248	0.206137	0.478884	0.425405	0.598915	0.306729
4754	SteCoe_43	Bisection	3	ARHGAP22	ENSDART00000014922	0.00485329	0.14939	0.0113798	1.22e-05	0.000659521	0.337854	0.496204	0.771444	0.664153
4755	SteCoe_43	Bisection	3	ARHGAP22 (1 OF MANY)	ENSDART00000112032	0.00196784	0.313188	0.00113892	8.34e-07	0.000441868	0.396989	0.894459	1.26478	1.01121
4774	SteCoe_28750	General	2	MCM7	ENSDART00000159300	0.00287623	0.00552581	0.000616562	0.000305854	0.491867	0.714704	0.831682	0.874292	0.339164
7	SteCoe_17003	OA_specific	1	ACSBG2	ENSDART00000124809	4.92e-05	0.206721	1.57e-13	2.58e-14	0.00215865	0.494562	1.91551	1.97909	0.982888
232	SteCoe_5031	OA_specific	2	CCDC22	ENSDART00000099769	0.0128939	0.0107904	0.00486177	0.00246721	0.665871	0.325454	0.346356	0.367425	0.130188
122	SteCoe_23557	OA_specific	2	GPATCH4	ENSDART00000150184	0.00662462	0.000239628	0.00923753	0.00153701	0.776238	0.624444	0.471783	0.550844	0.152734
263	SteCoe_8727	OA_specific	2	PPP3CA	ENSDART00000005929	0.00318926	0.0086869	0.554294	0.97947	0.191285	-0.536939	-0.189476	0.016657	0.377871
264	SteCoe_8727	OA_specific	2	PPP3CA	ENSDART00000166575	0.000363739	0.0351566	0.00841056	0.337242	0.0495587	-0.493388	-0.574193	0.281204	0.517021
226	SteCoe_4146	OA_specific	2	PRMT8B	ENSDART00000059489	0.00072061	0.00252998	0.00293215	8.38e-06	0.914579	-0.385133	-0.375733	-0.525037	0.0654265
77	SteCoe_17585	OA_specific	2	RPL9	ENSDART00000130277	0.000286897	7.81e-07	1.36e-09	2.78e-05	0.644025	0.669628	0.786808	0.580703	0.163432
261	SteCoe_8491	OA_specific	2	RPS6KB1B	ENSDART00000081059	0.042381	0.361501	0.29151	0.00407748	0.422033	0.156748	0.167681	0.344534	0.17499
110	SteCoe_21625	OA_specific	2	TRIM3A	ENSDART00000153657	0.00272178	0.838994	0.0213651	1.83e-05	0.00273417	0.0682356	0.356876	0.585605	0.467601
278	SteCoe_11168	OA_specific	3	ABI1A	ENSDART00000131768	0.0113197	0.00751034	0.00881392	0.000501767	0.389688	0.352423	0.342649	0.429769	0.194499
277	SteCoe_11168	OA_specific	3	ABI1B	ENSDART00000091644	0.0167423	0.529349	0.0710505	0.00103877	0.235265	0.181595	0.359193	0.565696	0.320388
376	SteCoe_32107	OA_specific	3	BBS5	ENSDART00000058255	0.0330372	0.462544	0.0119725	0.00532315	0.751964	-0.15389	-0.35114	-0.380364	-0.123388
302	SteCoe_15529	OA_specific	3	MSRA	ENSDART00000047362	0.00665828	0.921013	0.172146	0.000163684	0.0358357	-0.0318038	-0.196438	-0.422002	-0.295991
321	SteCoe_20110	OA_specific	3	PARP6B	ENSDART00000067066	1.46e-05	0.000282135	0.652029	0.00119111	2.65e-05	-0.443166	0.101161	0.402104	0.516387
350	SteCoe_26063	OA_specific	3	VTI1A	ENSDART00000066256	0.042541	0.368877	0.0991657	0.0033685	0.279	-0.147124	-0.216073	-0.331786	-0.195609
497	SteCoe_559	OA_specific	4	CAMK2D1	ENSDART00000145605	0.0201078	0.936029	0.183375	0.67378	0.00281329	0.0455195	0.325117	0.151136	0.629831
523	SteCoe_14862	OA_specific	5	ATP6V1H	ENSDART00000145681	0.000322013	0.00163775	0.531126	0.793561	0.0524265	0.627378	0.200274	0.109013	-0.483228
530	SteCoe_18686	OA_specific	5	RPS13	ENSDART00000052730	0.00538212	0.00174864	0.000874185	0.117395	0.995297	0.392793	0.40726	0.231403	0.00914818
944	SteCoe_27094	Sucrose	1	ABHD4	ENSDART00000169600	0.00414285	0.430735	0.00120144	0.668173	0.874857	0.160083	0.42368	-0.10396	-0.0849585
696	SteCoe_15048	Sucrose	1	ATP6V0A1B	ENSDART00000041714	0.00148793	0.00581059	0.0116167	0.760069	0.626781	-0.327889	-0.302695	-0.0707001	0.131627
621	SteCoe_11063	Sucrose	1	CABP2A	ENSDART00000172336	0.00714568	0.00618237	0.000312197	0.191163	0.000659521	-0.401439	-0.49197	-0.231849	-0.500015
622	SteCoe_11063	Sucrose	1	CABP2A	ENSDART00000160542	0.0132338	0.0100998	0.000528992	0.25071	0.00814981	-0.310654	-0.386779	-0.172317	-0.340396
894	SteCoe_24598	Sucrose	1	CACNA1BB	ENSDART00000089967	0.0939414	0.609437	0.00878439	0.264449	0.552424	-0.202837	-0.606116	-0.329318	-0.282649
879	SteCoe_23934	Sucrose	1	CAMK2G1	ENSDART00000162595	0.0328094	0.899114	0.00949629	0.334801	0.975672	-0.0457989	-0.362961	-0.180482	0.0325362
982	SteCoe_28784	Sucrose	1	CPA6	ENSDART00000134518	0.0143686	0.0214863	0.00823622	0.00442562	0.485497	-0.382405	-0.418059	-0.443148	-0.210306
666	SteCoe_13323	Sucrose	1	CTSC	ENSDART00000161967	0.000657061	2.72e-07	0.0548074	0.40464	0.892843	1.27978	0.583635	0.32906	-0.157215
1159	SteCoe_38290	Sucrose	1	EEF1G	ENSDART00000078522	0.00148037	0.00110908	5.22e-07	2.5e-05	0.427633	0.462832	0.651008	0.567355	0.209608
920	SteCoe_26117	Sucrose	1	GANAB (1 OF MANY)	ENSDART00000160753	0.0236963	0.99225	0.634574	0.0050779	0.456324	0.0046668	-0.0950163	-0.324325	-0.161685
1180	SteCoe_4496	Sucrose	1	GTPBP1	ENSDART00000146005	0.023051	0.040456	0.0102911	0.00779029	0.333325	0.461505	0.536791	0.55188	0.330029
1236	SteCoe_6918	Sucrose	1	HIBADHA	ENSDART00000160134	0.019496	0.51482	0.397232	0.000202215	0.4932	-0.191259	-0.221221	-0.647202	-0.244609
1036	SteCoe_31307	Sucrose	1	MARK1	ENSDART00000162055	0.00580849	0.900603	0.754684	0.0383136	0.00449219	-0.0537254	0.0998499	0.364173	0.499618
919	SteCoe_26084	Sucrose	1	MYBL1	ENSDART00000066655	0.00566628	0.35587	0.0158035	6.68e-05	0.000802882	-0.25581	-0.487314	-0.72749	-0.668391
652	SteCoe_12579	Sucrose	1	PDE1C	ENSDART00000122716	0.0146864	0.292834	0.00137115	0.000927053	0.0290551	-0.224024	-0.483765	-0.500061	-0.400547
1070	SteCoe_33425	Sucrose	1	RAB6BA	ENSDART00000049177	2.1e-05	1.99e-05	0.613393	0.00145883	1.48e-05	-0.532132	-0.115245	0.417565	0.557715
1069	SteCoe_33425	Sucrose	1	RAB6BB	ENSDART00000042255	0.000105127	0.567185	1.17e-06	2.35e-11	3.47e-08	0.249992	1.13578	1.4982	1.30776
1206	SteCoe_5770	Sucrose	1	SVOPA	ENSDART00000098727	0.0001406	1.12e-05	0.000853471	0.888072	0.971503	-0.499297	-0.394465	0.0410669	0.0319764
1153	SteCoe_37804	Sucrose	1	TAOK1B	ENSDART00000158289	0.0393896	0.480391	0.310915	0.00127406	0.706865	-0.136933	-0.168799	-0.390684	-0.122928
1154	SteCoe_37804	Sucrose	1	TAOK1B	ENSDART00000168850	0.0525921	0.917863	0.690904	0.00833954	0.792644	-0.0446861	-0.116319	-0.429811	-0.132611
888	SteCoe_24189	Sucrose	1	TMEM18	ENSDART00000053310	0.0232722	0.727239	0.843988	0.00903114	0.157967	-0.0916417	-0.0577526	-0.35398	-0.264449
1404	SteCoe_13862	Sucrose	2	AGTPBP1	ENSDART00000159782	0.000322759	0.871068	0.222886	4.62e-06	0.000323547	-0.0447061	0.173624	0.473062	0.407831
1671	SteCoe_25911	Sucrose	2	ASCC3	ENSDART00000124660	0.0109706	0.0149643	0.0213763	0.00228221	0.0986015	0.285037	0.269548	0.334773	0.241795
1839	SteCoe_34271	Sucrose	2	CACNA1DA	ENSDART00000173386	0.0281756	0.681837	0.00758237	0.324228	0.946641	-0.0978622	-0.344689	-0.169986	0.0485645
1687	SteCoe_26722	Sucrose	2	CDK14	ENSDART00000034421	0.0465952	0.29605	0.00526324	0.359676	0.974002	-0.378107	-0.738234	-0.336006	-0.0643272
1735	SteCoe_28993	Sucrose	2	CHKA	ENSDART00000060015	0.00859514	0.402496	0.0275118	2.79e-05	0.415535	-0.144459	-0.274568	-0.456317	-0.171919
1736	SteCoe_28993	Sucrose	2	CHKA	ENSDART00000060184	0.00412076	0.629246	0.00724127	0.000182577	0.609672	-0.101618	-0.321325	-0.420229	-0.136541
1943	SteCoe_5504	Sucrose	2	CLASP1A	ENSDART00000102445	0.0560207	0.0315372	0.00802792	0.431175	0.168009	-0.444419	-0.511465	-0.218814	-0.372606
1578	SteCoe_21965	Sucrose	2	CTSZ	ENSDART00000063251	3.54e-05	4.1e-20	8.66e-05	0.0015638	0.708634	1.11738	0.530774	0.448186	0.142842
1599	SteCoe_22751	Sucrose	2	ENO2	ENSDART00000037126	4.92e-05	0.0235544	0.234173	0.0295789	0.0012926	-0.315373	-0.196767	0.30075	0.433472
1378	SteCoe_13111	Sucrose	2	ILK	ENSDART00000079528	0.00345153	0.00453912	0.00257136	0.0030598	0.969601	0.338564	0.35005	0.346486	0.0320558
1681	SteCoe_26380	Sucrose	2	KIF3CA	ENSDART00000021341	0.00162774	0.671686	0.00217785	6.27e-07	0.00511772	0.127548	0.488322	0.730938	0.492488
1317	SteCoe_10909	Sucrose	2	KRI1	ENSDART00000125397	0.06916	0.0848466	0.14399	0.00614138	0.12481	-0.3183	-0.278223	-0.439933	-0.332259
1464	SteCoe_1663	Sucrose	2	LENG9	ENSDART00000132982	0.00220456	1.92e-06	1.31e-05	0.000900296	0.0599248	3.03147	2.78036	2.2413	1.63448
1465	SteCoe_1663	Sucrose	2	LENG9	ENSDART00000159534	0.00206914	0.0027611	0.000218539	0.428533	0.728145	0.343686	0.401471	0.132926	0.109702
1765	SteCoe_30232	Sucrose	2	NFYAL	ENSDART00000135973	0.00797499	0.193043	0.000606626	0.0568368	0.0110737	0.202128	0.401502	0.256238	0.346886
1847	SteCoe_3480	Sucrose	2	PTPDC1B	ENSDART00000081832	0.000675011	0.00013632	2.46e-06	7.92e-08	0.0364731	0.492409	0.580136	0.651643	0.340423
1718	SteCoe_28374	Sucrose	2	RAP1B	ENSDART00000042250	0.00366503	0.00275288	0.875001	0.952539	0.603419	0.339691	0.0417844	0.0194139	-0.132436
1647	SteCoe_25135	Sucrose	2	SLC2A3A	ENSDART00000134816	0.00067643	0.00194069	0.000438389	0.858616	0.71522	-0.406787	-0.44403	-0.0529581	0.129218
1908	SteCoe_3873	Sucrose	2	USP24	ENSDART00000083890	0.0339762	0.103086	0.137777	0.00427692	0.192983	0.219268	0.201083	0.325421	0.2166
2102	SteCoe_12084	Sucrose	3	ABCC5	ENSDART00000087070	0.0132651	0.813841	0.159783	0.00781118	0.893744	0.063507	-0.209331	-0.331966	-0.0700063
2677	SteCoe_33065	Sucrose	3	ABCG4A	ENSDART00000141444	0.000281821	0.883328	0.170975	7.75e-07	7.57e-06	-0.060113	0.269267	0.721083	0.688158
2602	SteCoe_29840	Sucrose	3	ABHD16A	ENSDART00000110606	0.00167905	0.907807	0.0106406	0.000275065	0.0798385	0.0340683	-0.290276	-0.385495	-0.249442
2548	SteCoe_28130	Sucrose	3	ABL1	ENSDART00000149910	0.0343955	0.768441	0.139252	0.0079589	0.95228	0.0878151	0.252043	0.38582	0.051793
2847	SteCoe_6523	Sucrose	3	ATG16L2	ENSDART00000130297	0.0368646	0.00568047	0.012841	0.24385	0.636414	0.527142	0.480414	0.279349	0.207972
2820	SteCoe_5549	Sucrose	3	ATP8B4	ENSDART00000115343	0.0071523	0.541765	0.00353967	0.00176922	0.999167	-0.126264	-0.363733	-0.385611	-0.00148052
2456	SteCoe_24932	Sucrose	3	CAMK2A	ENSDART00000039571	0.00136348	0.000128128	1.98e-05	0.0126037	0.177183	-0.838498	-0.905374	-0.593079	-0.446883
2310	SteCoe_19241	Sucrose	3	CDC42BPAB	ENSDART00000040456	0.00158757	8.27e-05	0.0800218	0.309555	0.661567	-0.484798	-0.25845	-0.177779	0.139329
2311	SteCoe_19241	Sucrose	3	CDC42BPAB	ENSDART00000113773	0.00236289	0.00163775	0.0507306	0.994164	0.615766	-0.428966	-0.296406	0.0035286	0.157857
2510	SteCoe_26963	Sucrose	3	CMTR1	ENSDART00000049373	0.0674009	0.16644	0.0253238	0.00849	0.306712	3.52973	4.85425	5.48341	3.40866
2462	SteCoe_25041	Sucrose	3	CTSA	ENSDART00000159246	0.00492831	0.00093133	0.00325143	0.354871	0.95949	0.55425	0.498653	0.21946	0.0559757
2440	SteCoe_24494	Sucrose	3	ETFDH	ENSDART00000056712	0.0118913	0.153183	0.0010089	0.00498671	0.688986	0.235637	0.425716	0.377386	0.136575
2433	SteCoe_24292	Sucrose	3	GTPBP4	ENSDART00000026339	0.0480962	0.565129	0.00549793	0.0984358	0.882311	0.113642	0.327641	0.222548	0.0713596
2765	SteCoe_36843	Sucrose	3	KCNB1	ENSDART00000153673	0.00060684	7.34e-05	2.06e-08	0.00449279	0.869612	-0.632197	-0.836187	-0.4811	-0.109365
2291	SteCoe_18481	Sucrose	3	KCNH1A	ENSDART00000029703	1.36e-05	0.00298266	4.97e-20	0.0012067	0.91415	-0.531747	-1.366	-0.565479	0.0919354
2108	SteCoe_12335	Sucrose	3	KCNH4B	ENSDART00000167977	0.0219609	0.0316345	0.024373	0.000319451	0.294918	-0.815042	-0.830195	-1.20019	-0.588369
2109	SteCoe_12335	Sucrose	3	KCNH4B	ENSDART00000089042	0.0281423	0.0620975	0.0430023	0.00054732	0.399856	-0.293363	-0.305962	-0.462057	-0.20746
2277	SteCoe_1827	Sucrose	3	MAP3K13	ENSDART00000007401	0.0195004	0.0738673	0.000871999	0.00314804	0.055183	-0.231844	-0.363439	-0.331819	-0.269325
2544	SteCoe_28006	Sucrose	3	NAPGB	ENSDART00000162403	0.0302782	0.0205358	0.000797497	0.0400716	0.156855	-0.426473	-0.557408	-0.383093	-0.343712
2622	SteCoe_30840	Sucrose	3	STXBP1A	ENSDART00000015629	0.00341349	0.000430772	0.0543369	0.750571	0.943046	-0.407999	-0.254916	-0.0749381	0.0483384
2623	SteCoe_30840	Sucrose	3	STXBP1A	ENSDART00000171306	0.00127784	7.59e-05	0.000641301	0.668371	0.955377	-0.614796	-0.539858	-0.126841	0.05717
2624	SteCoe_30840	Sucrose	3	STXBP1A	ENSDART00000148199	0.00293663	0.000516651	0.000148849	0.120208	0.991399	-0.541285	-0.573795	-0.292067	-0.0206584
2415	SteCoe_237	Sucrose	3	SV2BA	ENSDART00000124676	0.0187908	0.723816	0.0297709	0.00079619	0.637323	-0.120325	-0.401787	-0.561843	-0.191683
2416	SteCoe_237	Sucrose	3	SV2BB	ENSDART00000154748	0.000171543	1.87e-07	2.58e-06	0.0348766	0.850799	-0.593359	-0.5371	-0.285465	0.0871613
2196	SteCoe_15434	Sucrose	3	TMEM230A	ENSDART00000038674	0.00502885	0.0492918	0.0148762	0.00144957	0.000950772	-0.312877	-0.360089	-0.444508	-0.485519
3239	SteCoe_21852	Sucrose	4	CERS2A	ENSDART00000025385	0.00721984	0.00208257	0.000378899	0.00228221	0.705904	0.593684	0.657004	0.583942	0.192392
3147	SteCoe_18346	Sucrose	4	CHMP4BB	ENSDART00000015193	0.00175404	0.00427045	5.93e-06	0.000232664	0.874948	0.349512	0.50022	0.42525	0.0761726
3262	SteCoe_22505	Sucrose	4	DESI2	ENSDART00000034935	0.00953206	0.815081	0.0102911	0.00265396	0.489176	0.0738508	0.377607	0.427285	0.193399
3010	SteCoe_12866	Sucrose	4	DGAT1B	ENSDART00000077185	0.00214722	0.00233098	0.0303606	0.194091	0.500299	0.791384	0.604878	0.419421	-0.346047
3277	SteCoe_23014	Sucrose	4	DGKE	ENSDART00000163394	0.0195218	0.405353	0.0660335	0.00616103	0.0525377	-0.154264	-0.257556	-0.346312	-0.300236
3773	SteCoe_976	Sucrose	4	EIF2AK2	ENSDART00000165066	0.000768304	0.696002	0.24657	4.33e-09	0.687528	0.145137	0.290336	1.00851	0.199275
3030	SteCoe_1365	Sucrose	4	KCNA2A	ENSDART00000027398	2.55e-05	3.67e-11	2.1e-09	0.585691	0.643352	-1.55863	-1.41307	-0.244651	0.296687
3031	SteCoe_1365	Sucrose	4	KCNA2B	ENSDART00000163903	5.03e-05	1.34e-07	1.73e-09	0.360785	0.643108	-1.04161	-1.15073	-0.278605	0.240702
3104	SteCoe_16476	Sucrose	4	NOP2	ENSDART00000114272	0.0223283	0.0100951	0.00223174	0.0242807	0.70054	0.471489	0.531038	0.420889	0.177047
3027	SteCoe_13541	Sucrose	4	PI4KAA	ENSDART00000113162	0.0164747	0.382375	0.00134741	0.0659275	0.995811	-0.14599	-0.358429	-0.235576	-0.00719385
3719	SteCoe_7490	Sucrose	4	VPS33A	ENSDART00000167388	0.0336613	0.373093	0.070228	0.00465173	0.0516564	0.155328	0.245634	0.343008	0.290253
3895	SteCoe_16767	Sucrose	5	CCT5	ENSDART00000066760	0.00484766	0.00624698	5.52e-05	0.000779256	0.4561	0.325276	0.436852	0.379246	0.163513
4077	SteCoe_29078	Sucrose	5	DUSP8B	ENSDART00000057318	0.00103869	8.49e-06	2.63e-08	0.000281217	0.163464	0.806598	0.9621	0.680538	0.386785
3798	SteCoe_11058	Sucrose	5	MFSD10	ENSDART00000129903	0.000409421	4.01e-06	5.55e-05	0.0537618	0.999167	0.819604	0.724514	0.409438	0.00403262
3959	SteCoe_20943	Sucrose	5	RPL18	ENSDART00000043173	0.0050402	0.00117436	0.00436814	0.0903978	0.998033	0.389154	0.34751	0.235541	0.00423952
3791	SteCoe_10588	Sucrose	5	VTA1	ENSDART00000067053	0.00395302	0.0534129	8.09e-06	0.00069316	0.49499	0.243042	0.457631	0.367763	0.149685
3908	SteCoe_17511	Sucrose	5	WDR17	ENSDART00000170546	0.0628573	0.36655	0.303196	0.00549741	0.896582	-0.201427	-0.213427	-0.433784	-0.087288
4604	SteCoe_13946	Tail	1	PPP5C	ENSDART00000129380	0.000402095	1.67e-08	0.773276	0.000760668	0.000380639	0.718885	0.0823095	0.464958	0.512509
4615	SteCoe_20619	Tail	1	RRP12	ENSDART00000034829	0.00217038	1.22e-05	0.000236998	0.00189167	0.796732	0.494057	0.423928	0.372143	0.099319
4606	SteCoe_14893	Tail	1	SHMT1	ENSDART00000141578	0.00245669	0.191578	0.00108855	0.00189167	1	2.36758	4.511	4.35468	-7.25e-16
