# Supplementary material for: Modular, cascade-like transcriptional program of regeneration in Stentor
Source: eLife. 2022 Aug 4;11:e80778. doi: 10.7554/eLife.80778 (PMC9371601; doi:10.7554/eLife.80778)
Supplement: Supplementary file 10. [file elife-80778-supp10.xlsx]

## Sheet: Table_S10_compare_mammalian_cel
mouse cell-cycle specific gene expression from Table S1 of Kowalczyk 2015
Symbol	Significant Population	Early G1	Late G1	S	G2M	max expression	Gene_ID	Regeneration	cluster
Xrcc5	3	1.0603	0.551488	0.598665	-0.231546	early G1	SteCoe_11999	Sucrose	3
Cct5	3	1.32621	1.24253	1.32456	1.08183	early G1	SteCoe_16767	Sucrose	5
Dld	2	1.15464	2.0886	1.56583	2.16184	g2m	SteCoe_10139	Sucrose	1
Nup35	3	0.19349	0.590145	0.682695	1.72707	g2m	SteCoe_1067	Sucrose	3
Asnsd1	2	0.73025	0.912913	1.20878	1.2633	G2M	SteCoe_11971	Anterior	1
Ilk	3	0.0706329	1.08846	1.75287	2.01609	g2M	SteCoe_13111	Sucrose	2
Msra	2	1.1428	1.77107	2.57795	2.96549	g2M	SteCoe_15529	OA_specific	3
Dnajc11	2	1.15464	2.0886	1.56583	2.16184	g2M	SteCoe_16024	OA_specific	5
C2cd3	2	0.0138849	0.547907	1.3109	1.31293	g2M	SteCoe_17708	Sucrose	3
Coq6	5	0.34659	1.50314	1.32025	1.28707	g2M	SteCoe_17794	Sucrose	3
Pigq	2	0.456052	0.487558	1.39671	1.63171	g2M	SteCoe_18240	Sucrose	1
Nek2	6	-0.056986	0.210875	1.07608	2.50894	g2M	SteCoe_18273	OA_specific	2
Cdc23	2	0.916256	0.376116	1.17262	2.27702	g2M	SteCoe_20079	OA_specific	3
Nde1	6	0.787608	1.92491	2.90148	5.17405	g2M	SteCoe_20715	OA_specific	2
Gtpbp4	3	1.54269	1.65366	1.68094	1.72607	g2M	SteCoe_24292	Sucrose	3
Gabpb1	4	1.52235	0.629872	2.13275	2.34035	g2M	SteCoe_25044	OA_specific	1
Mtpap	2	0.203	0.0852234	1.13966	1.39122	g2M	SteCoe_25318	OA_specific	3
Ganab	2	0.628994	0.956027	1.99738	2.22918	g2M	SteCoe_26117	Sucrose	1
Cks2	6	1.07315	2.30272	4.44053	6.8988	g2M	SteCoe_2616	Sucrose	2
Nfyb	5	0.575735	1.51994	2.88002	2.8824	g2M	SteCoe_26735	Sucrose	3
Eif4e2	3	1.26376	1.42261	1.68304	1.87567	g2M	SteCoe_2697	Sucrose	5
Rlim	4	-0.385202	1.0331	1.20313	1.52369	g2M	SteCoe_29276	Sucrose	4
B9d2	3	1.75023	1.9044	2.53277	2.6647	g2M	SteCoe_30969	Sucrose	1
Ccdc113	3	-0.0162354	-0.303918	0.175044	2.67005	g2M	SteCoe_31428	Sucrose	1
Mettl5	2	0.493999	0.94459	0.973579	1.2987	g2M	SteCoe_34719	OA_specific	3
Rangap1	6	0.74931	2.33031	3.30148	4.14159	g2M	SteCoe_36285	OA_specific	3
Zfand4	3	0.37165	0.470253	0.388482	1.15247	g2M	SteCoe_37037	OA_specific	5
Cwc27	2	0.174092	0.220109	0.574832	1.7869	g2M	SteCoe_519	OA_specific	2
Pus10	2	0.374272	1.19428	1.15458	1.86153	g2M	SteCoe_6230	Sucrose	1
Ssna1	5	1.83111	2.35771	3.13335	3.96617	g2M	SteCoe_6434	Sucrose	4
Xpo1	4	0.581715	1.92353	1.83825	2.69362	g2M	SteCoe_6838	Sucrose	3
Polr1d	3	1.58581	1.81582	1.94808	2.24134	g2M	SteCoe_7851	Sucrose	1
Urod	2	0.780072	1.25603	1.04941	1.5575	g2M	SteCoe_9278	Sucrose	4
Ndufs2	4	0.881193	2.06207	2.34523	2.67399	g2M	SteCoe_9528	Sucrose	4
Dhrs7b	3	0.853919	0.816284	1.25668	1.38628	g2M	SteCoe_964	Sucrose	2
Dpm2	2	0.55475	1.05074	0.766265	1.01236	late G1	SteCoe_2134	Sucrose	1
Gpatch4	5	1.56013	2.06057	1.29657	1.18561	late G1	SteCoe_23557	OA_specific	2
Ing5	4	0.969118	1.17817	1.06021	0.527802	late G1	SteCoe_24542	OA_specific	2
Vars	4	0.210212	1.13762	0.997904	1.11209	late G1	SteCoe_2629	Sucrose	1
Got1	3	0.347445	1.38529	0.992048	1.36108	late G1	SteCoe_28689	Sucrose	4
Atg5	2	0.41844	1.13151	1.06368	0.905776	late G1	SteCoe_29797	Sucrose	3
Imp4	4	1.85581	2.85544	2.83115	2.47212	late G1	SteCoe_33071	OA_specific	2
Galk2	2	0.401955	1.39545	1.34831	0.745809	late G1	SteCoe_34225	Sucrose	3
Kars	3	1.37232	2.08293	2.00214	1.95802	late G1	SteCoe_37355	Anterior	2
Gpr89	2	0.108482	0.861604	0.993545	0.948473	late G1	SteCoe_7042	Sucrose	3
Commd10	2	0.798005	1.3115	1.30067	0.934376	late G1	SteCoe_7209	OA_specific	4
Cdk5rap3	2	0.515954	0.928812	2.44383	0.670418	s	SteCoe_10142	Sucrose	2
Timeless	6	4.03804	4.62815	5.0686	2.36427	s	SteCoe_10520	Sucrose	5
Ppm1g	6	0.974602	1.63377	2.99575	1.13798	s	SteCoe_10728	Sucrose	1
Mfsd10	4	1.5347	2.43649	3.11435	1.04903	s	SteCoe_11058	Sucrose	5
Gins2	6	3.77781	6.01491	6.54794	3.91018	s	SteCoe_11886	Sucrose	4
Mlh1	3	0.626009	0.954985	1.30688	1.54374	s	SteCoe_12555	Sucrose	3
Ppp1cb	3	0.734303	1.26602	1.57911	1.04325	s	SteCoe_12950	Sucrose	5
Naa20	3	1.48131	2.36582	3.22637	2.21685	s	SteCoe_13170	Sucrose	4
Pcyt2	2	0.695216	1.26422	2.01588	1.45915	s	SteCoe_13689	Sucrose	4
Shmt1	5	3.56281	5.03122	5.70749	2.10026	s	SteCoe_14893	Tail	1
Nop14	2	0.969494	1.24531	2.14159	0.857668	s	SteCoe_15065	Sucrose	4
Eif4a3	6	1.63344	3.23781	3.69472	2.25668	s	SteCoe_15531	Sucrose	4
Nop2	4	1.72675	2.54136	2.5468	0.385882	s	SteCoe_16476	Sucrose	4
Mrpl17	5	1.12546	2.07742	2.947	0.675661	s	SteCoe_17310	Sucrose	5
Pmm1	2	0.0311902	1.0249	1.49	0.290289	s	SteCoe_17463	Bisection	2
Lyar	5	1.55172	2.82021	3.25404	2.88176	s	SteCoe_17862	Sucrose	5
Vps29	2	0.410421	1.74897	2.22724	1.98179	s	SteCoe_1843	Sucrose	3
Exosc5	3	2.0911	2.93216	3.72028	2.34386	s	SteCoe_19797	Sucrose	5
Rrp12	4	0.956496	1.61082	1.65312	0.672928	s	SteCoe_20619	Tail	1
Fh1	3	1.5979	2.35733	2.57851	2.21781	s	SteCoe_22258	Sucrose	4
Klhdc4	4	0.970054	0.818143	1.69925	1.67102	s	SteCoe_23108	Sucrose	2
Arf2	2	0.73582	1.05291	1.92529	1.86539	s	SteCoe_23216	Sucrose	4
Tmem147	3	2.11527	2.16033	3.18131	1.59936	s	SteCoe_23547	Sucrose	2
Ddx56	4	0.856928	2.10052	3.16295	1.55415	s	SteCoe_25359	Sucrose	3
Vti1a	2	0.562515	0.646577	1.00007	0.701549	s	SteCoe_26063	OA_specific	3
Srrm1	2	0.836372	1.07518	1.10396	0.77019	s	SteCoe_26112	Sucrose	4
Sf3b5	5	2.10436	2.85534	4.38507	3.14917	s	SteCoe_2623	OA_specific	3
Prpf38b	2	1.1009	1.53702	1.59525	0.678865	s	SteCoe_27496	Sucrose	1
Tk1	6	1.09284	4.93935	8.94289	5.16815	s	SteCoe_27531	Sucrose	3
Nae1	4	0.380552	1.22827	1.63454	1.11384	s	SteCoe_27682	Anterior	2
Mcm7	6	5.93777	7.09642	7.26654	4.75988	s	SteCoe_28750	General	2
Cetn3	4	1.66639	2.05555	2.49602	1.45532	s	SteCoe_29038	Sucrose	1
Myg1	5	1.83422	2.77487	3.78645	1.91004	s	SteCoe_2943	Sucrose	4
Snrpg	3	1.91735	2.13727	3.03942	2.56889	s	SteCoe_29645	Bisection	1
Abhd16a	2	0.430803	1.21788	1.2486	0.965368	s	SteCoe_29840	Sucrose	3
Prdx4	6	1.53204	2.09141	2.77196	2.13217	s	SteCoe_31301	OA_specific	2
Tyms	6	1.09592	2.63168	4.58716	2.64771	s	SteCoe_3190	Sucrose	3
Yif1b	4	1.39712	1.54167	3.22808	1.88367	s	SteCoe_32146	Sucrose	2
Ncln	4	0.605201	1.14222	1.44203	1.05653	s	SteCoe_32440	Sucrose	3
Mthfd2	6	0.322314	2.24443	4.28101	2.10554	s	SteCoe_33062	Sucrose	3
Sarnp	2	1.3748	1.39579	2.39071	2.11939	s	SteCoe_33080	Sucrose	3
Rad51ap1	6	0.348948	2.76916	5.01764	3.05258	s	SteCoe_33979	Sucrose	4
Ube2k	3	0.951402	1.54733	2.24983	1.0643	s	SteCoe_33996	Sucrose	4
Anp32a	2	0.978766	1.27211	1.3653	1.12256	s	SteCoe_34046	Sucrose	3
Ift140	2	0.161262	0.731622	1.21326	0.829656	s	SteCoe_34559	Sucrose	2
Sf3b3	5	2.064	2.64575	2.72774	1.95292	s	SteCoe_35408	Sucrose	2
Sin3b	3	0.619876	0.408276	1.56824	1.737	s	SteCoe_35428	OA_specific	3
Pgm1	2	0.749326	0.540431	1.81296	0.887139	s	SteCoe_36724	Anterior	2
Fkbp4	4	2.39773	2.95076	3.66149	1.62802	s	SteCoe_37123	Bisection	3
Litaf	3	1.12333	1.87104	3.00458	1.53472	s	SteCoe_4051	Sucrose	3
Ccdc22	2	0.925427	1.56236	2.25483	1.20451	s	SteCoe_5031	OA_specific	2
Wdr31	5	0.122956	0.571943	1.21205	0.906733	s	SteCoe_5660	Sucrose	4
Timm17a	3	1.21134	2.0974	2.00156	1.65859	s	SteCoe_5774	Sucrose	1
Dnajc9	6	4.57272	5.4039	6.19912	5.38175	s	SteCoe_5789	Sucrose	4
Immt	3	1.38173	1.64763	1.9504	1.40957	s	SteCoe_6073	Sucrose	1
Brd3	3	1.30629	1.54925	1.9636	1.3625	s	SteCoe_7107	OA_specific	5
Enkd1	5	0.548272	0.897095	1.54517	0.671327	s	SteCoe_7169	Sucrose	4
Mrpl15	3	0.873664	1.7615	2.08853	1.40384	s	SteCoe_7956	Sucrose	1
Ncs1	3	1.20554	1.73288	1.82435	-0.0273615	s	SteCoe_828	Sucrose	1
Actl6a	5	2.09583	3.25488	4.13863	2.69816	s	SteCoe_9629	Sucrose	1
Pole	6	0.619072	2.84767	3.70413	1.96775	s	SteCoe_33801	Sucrose	1
