# Supplementary figures and images for: Modular, cascade-like transcriptional program of regeneration in Stentor
Source: eLife journal article supplement (doi:10.7554/elife.80778), 2022-08-04

**A.**

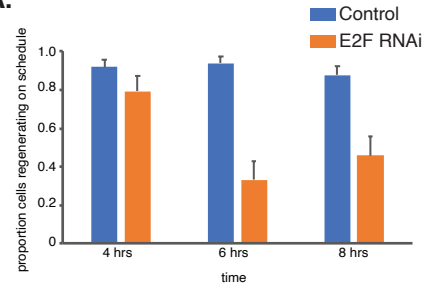

**B.**

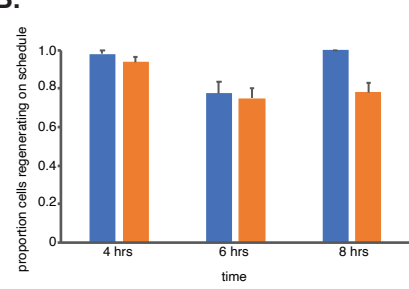

**C.**

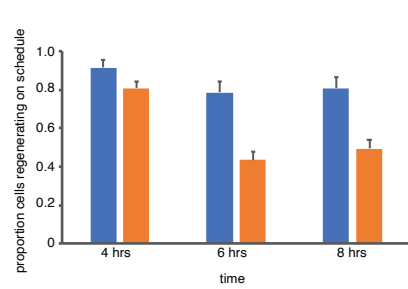

**D.**

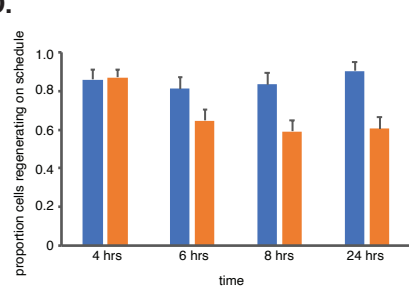

**E.**

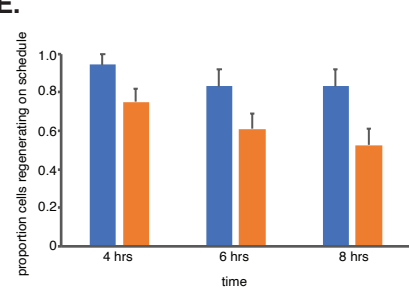

Supplement: supp [file elife-80778-supp-v1.zip]

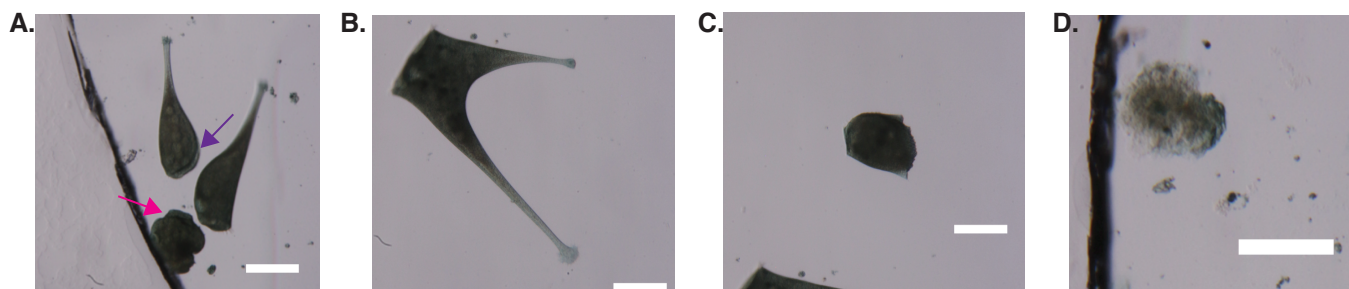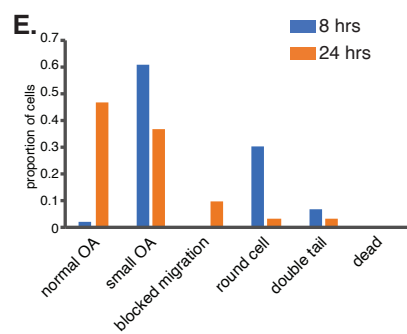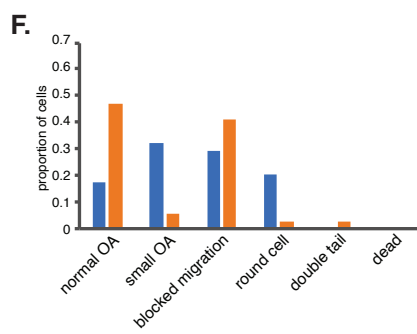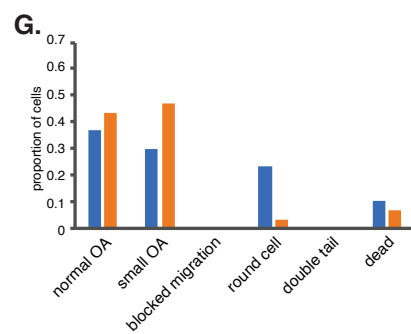

Supplement: supp [file elife-80778-supp-v1.zip]
